# Supplementary material for: A novel method to determine perineal artery occlusion among male bicyclists
Source: PeerJ journal article supplement (doi:10.7717/peerj.1477), 2015-12-21

id=AG0517 seat=easyrider condition=roadride

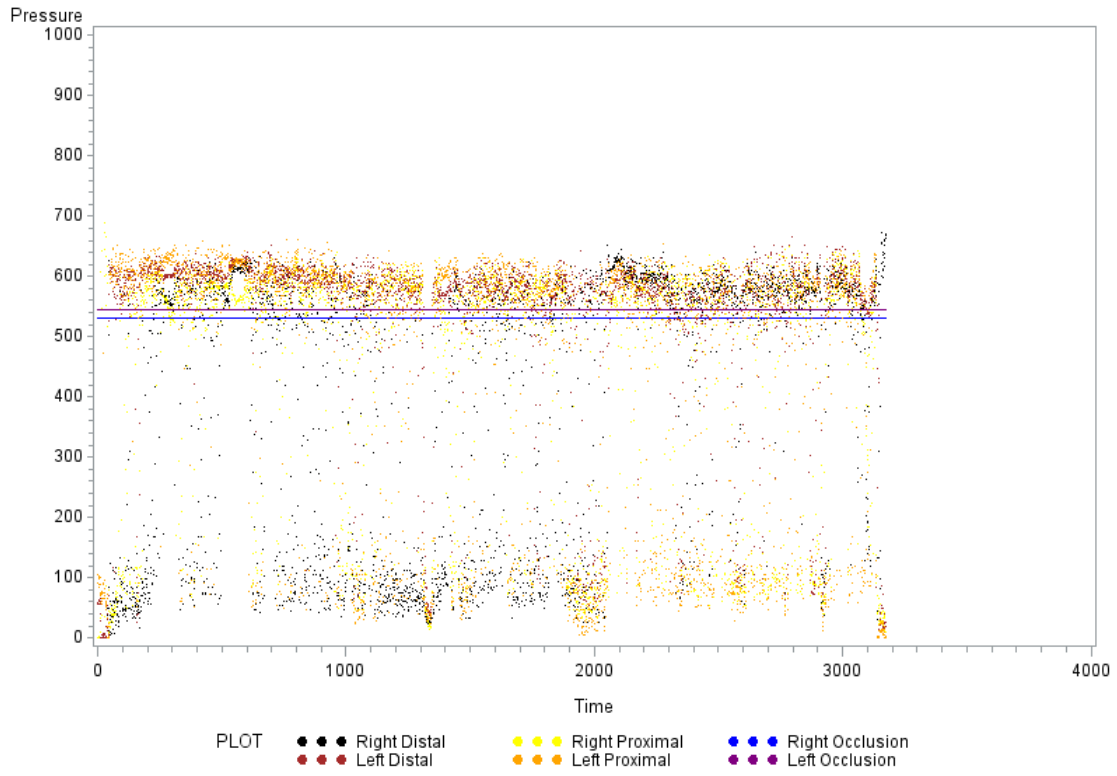

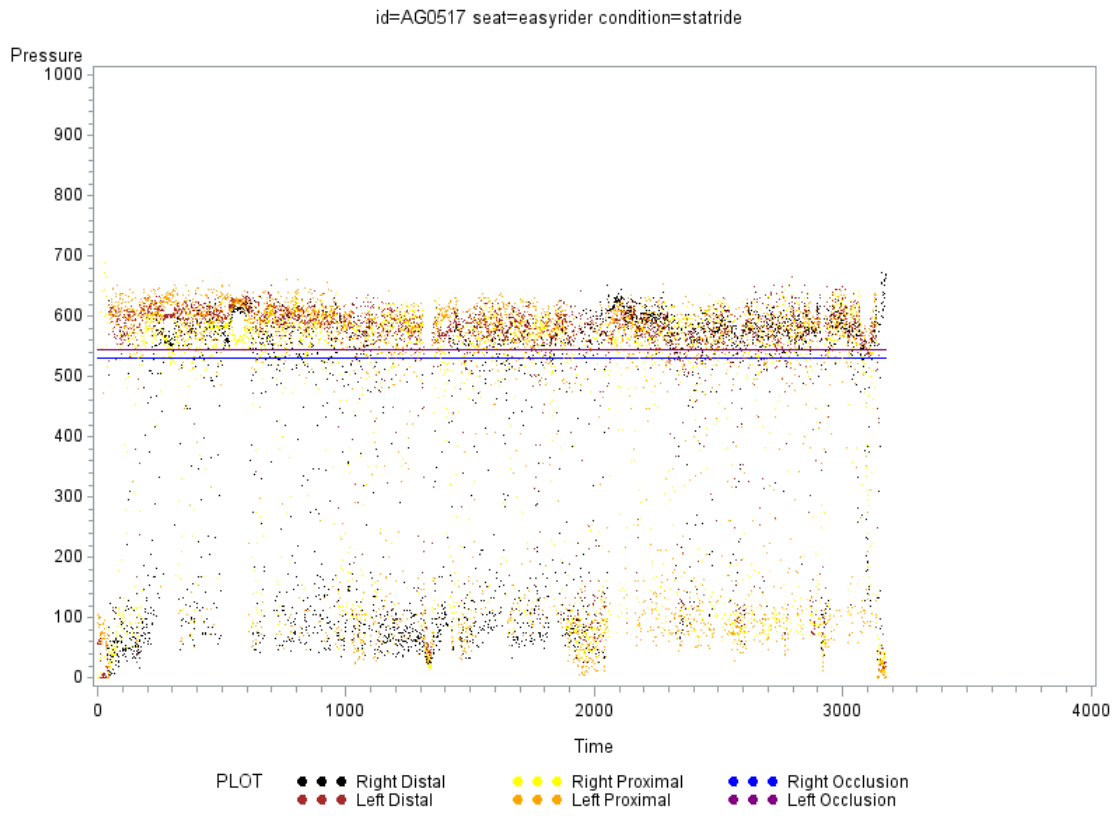

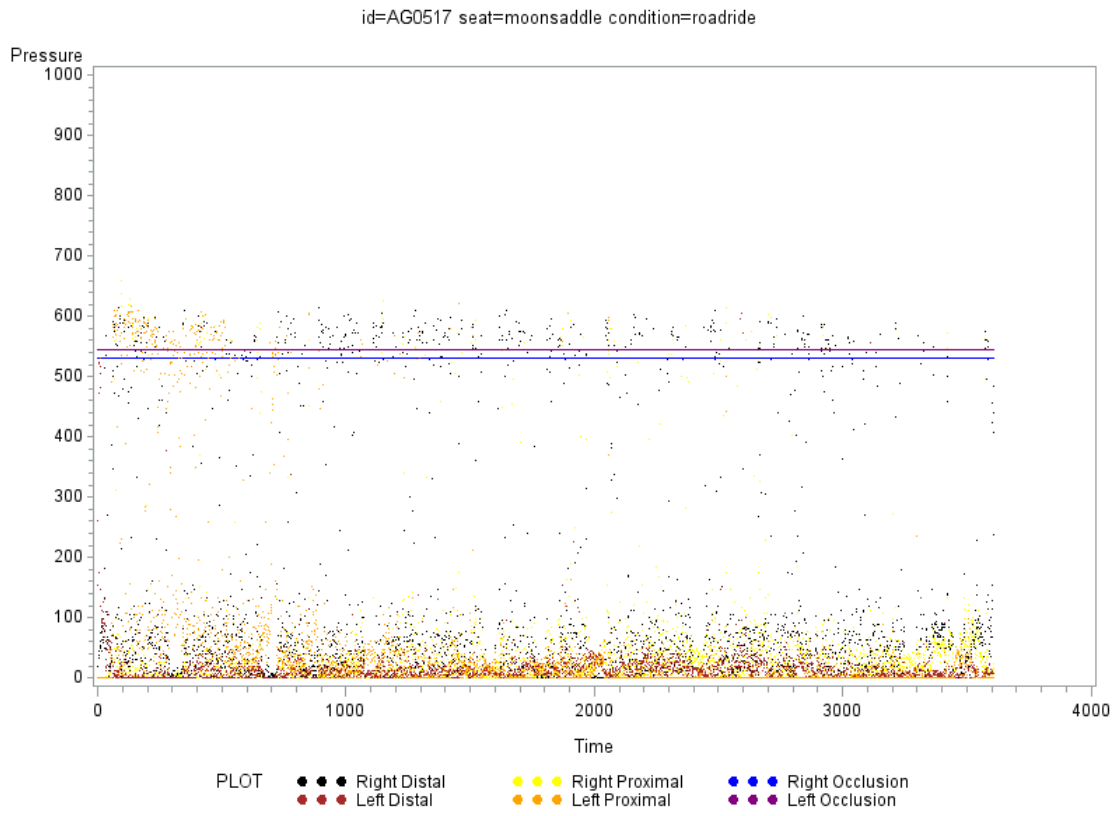

id=AG0517 seat=moonsaddle condition=statride

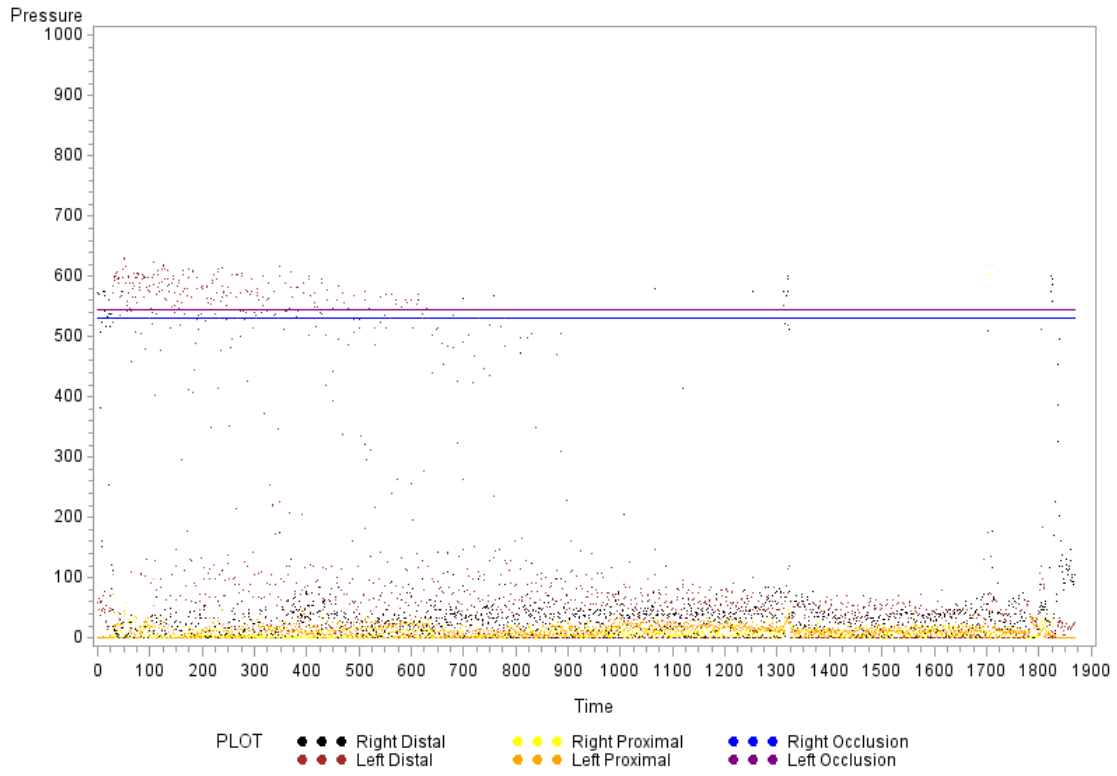

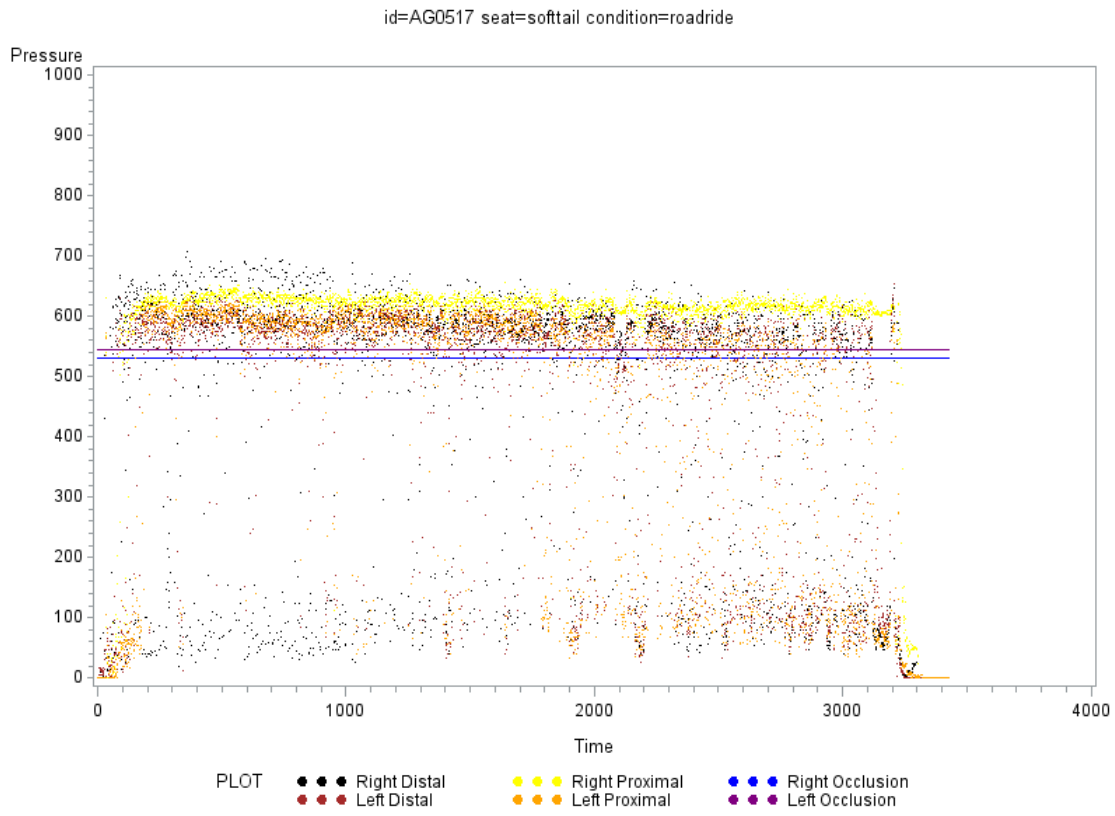

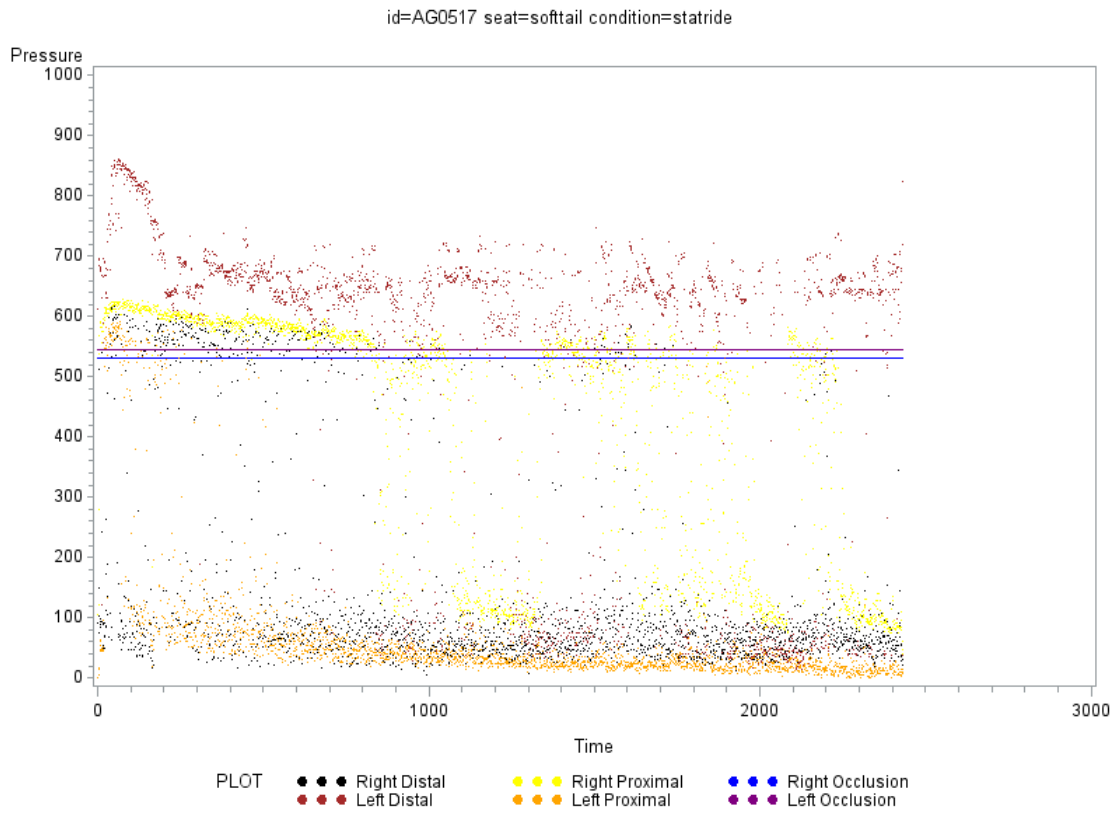

id=AG0517 seat=spiderflex condition=roadride

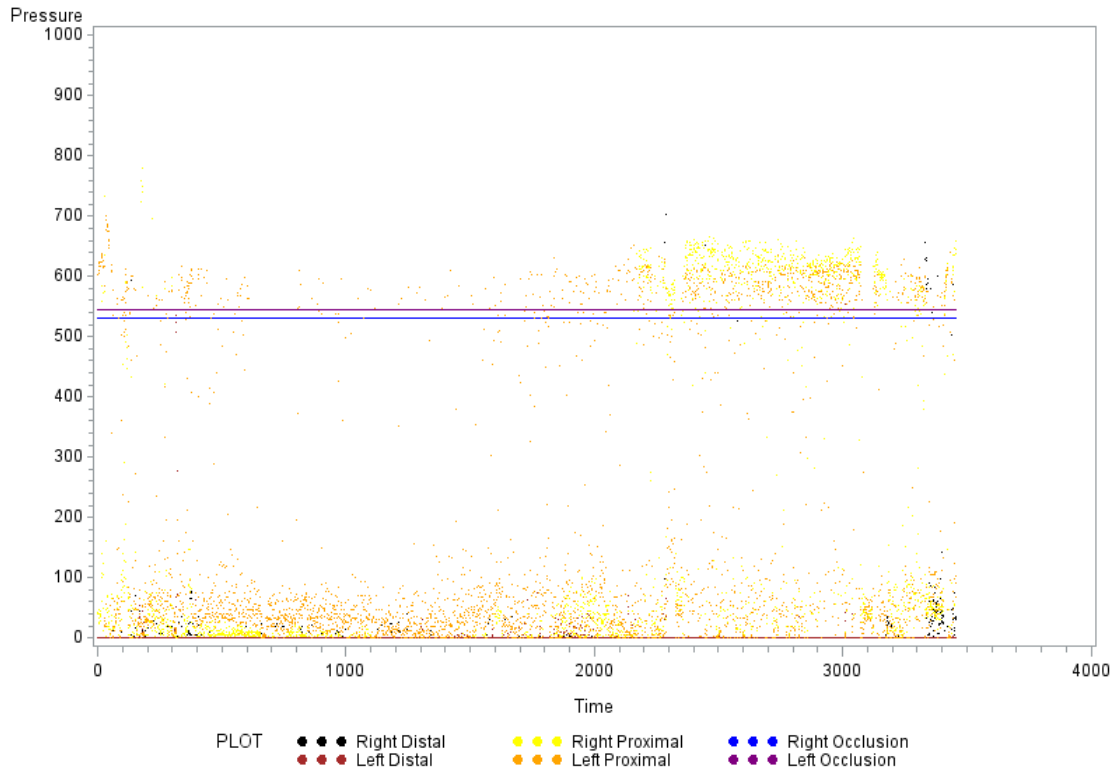

id=AG0517 seat=spiderflex condition=statride

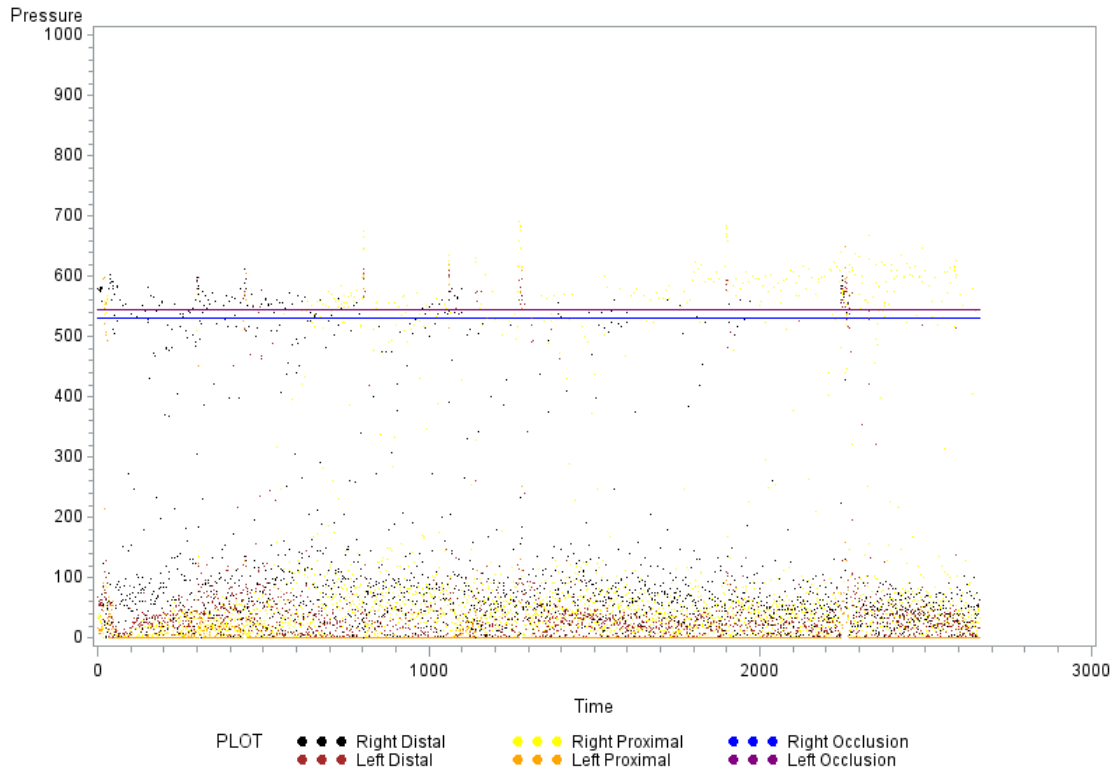



id=AG0517 seat=standard condition=roadride

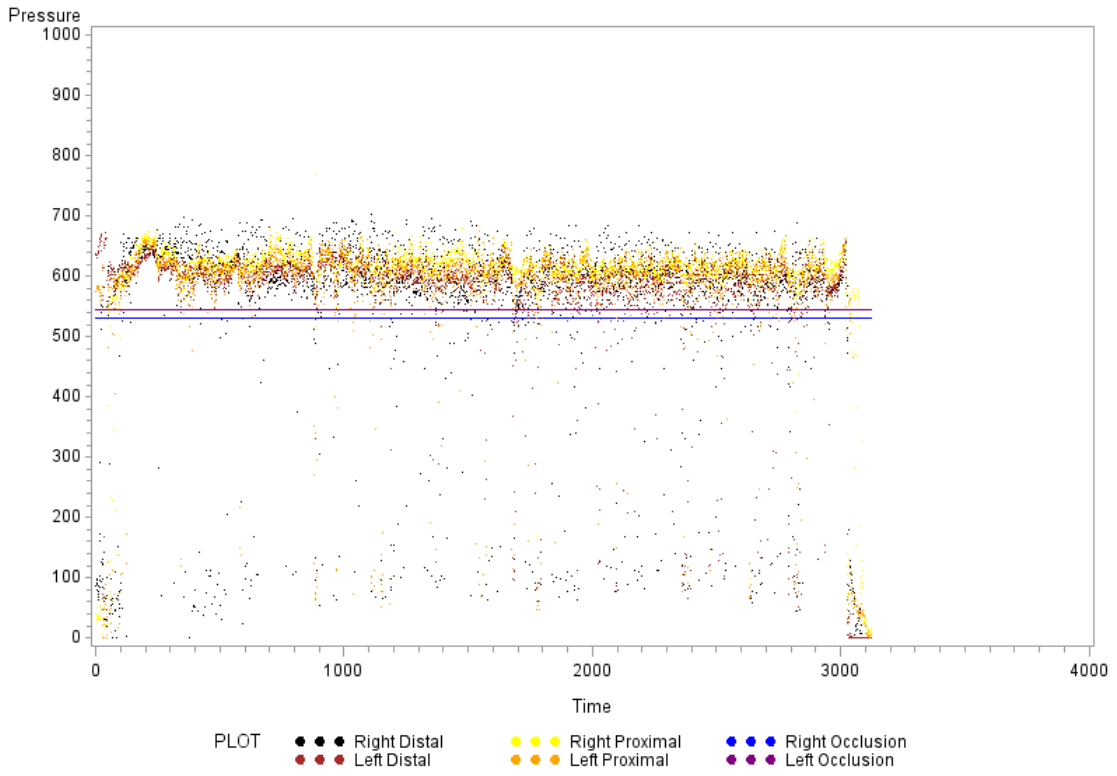

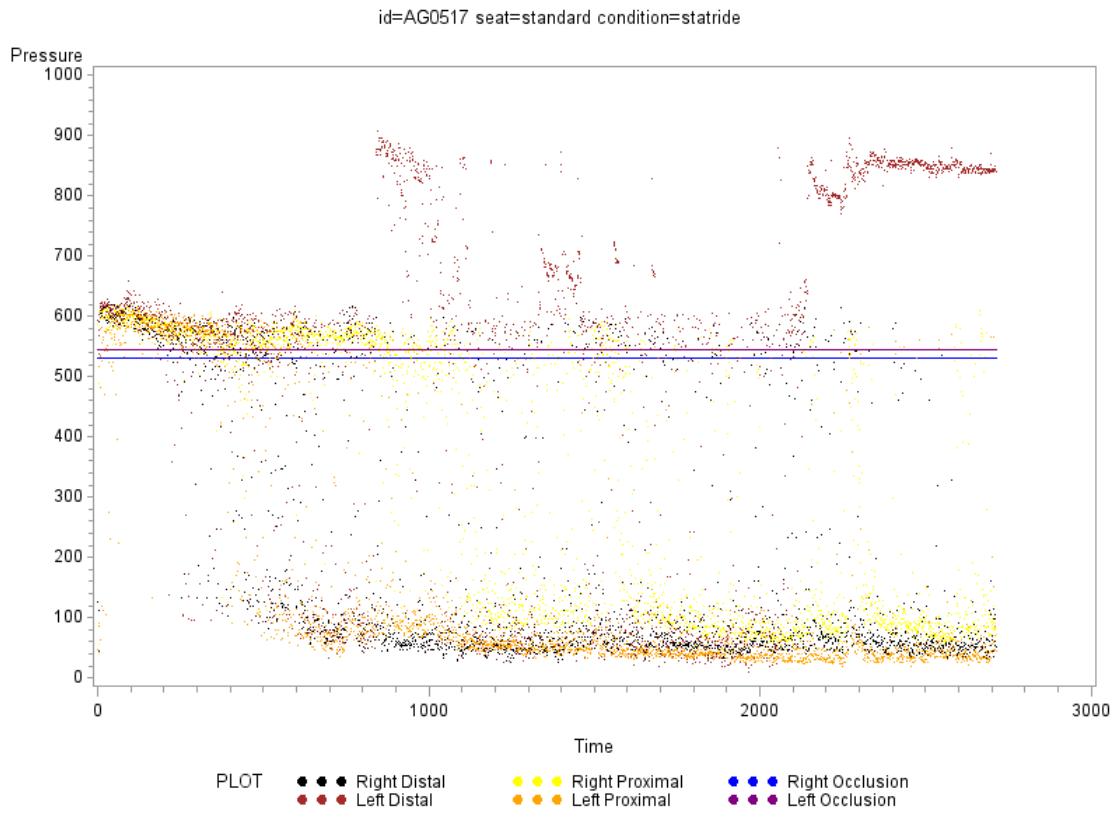

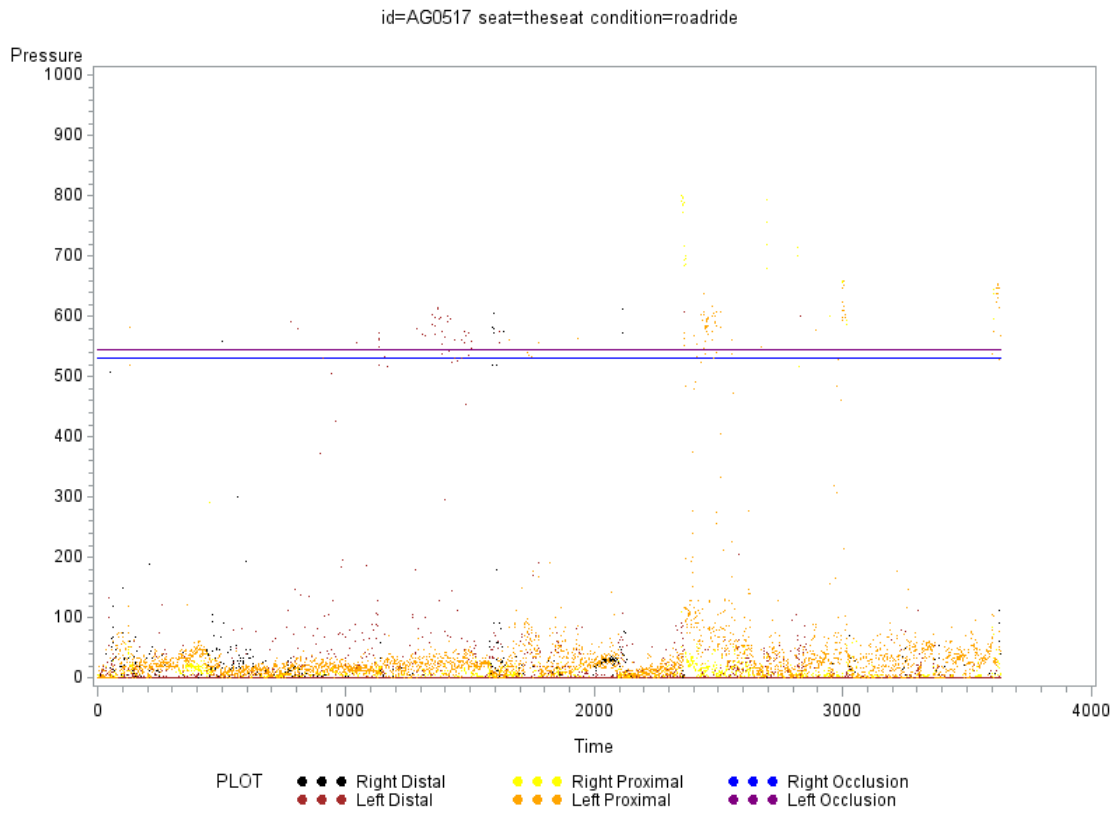

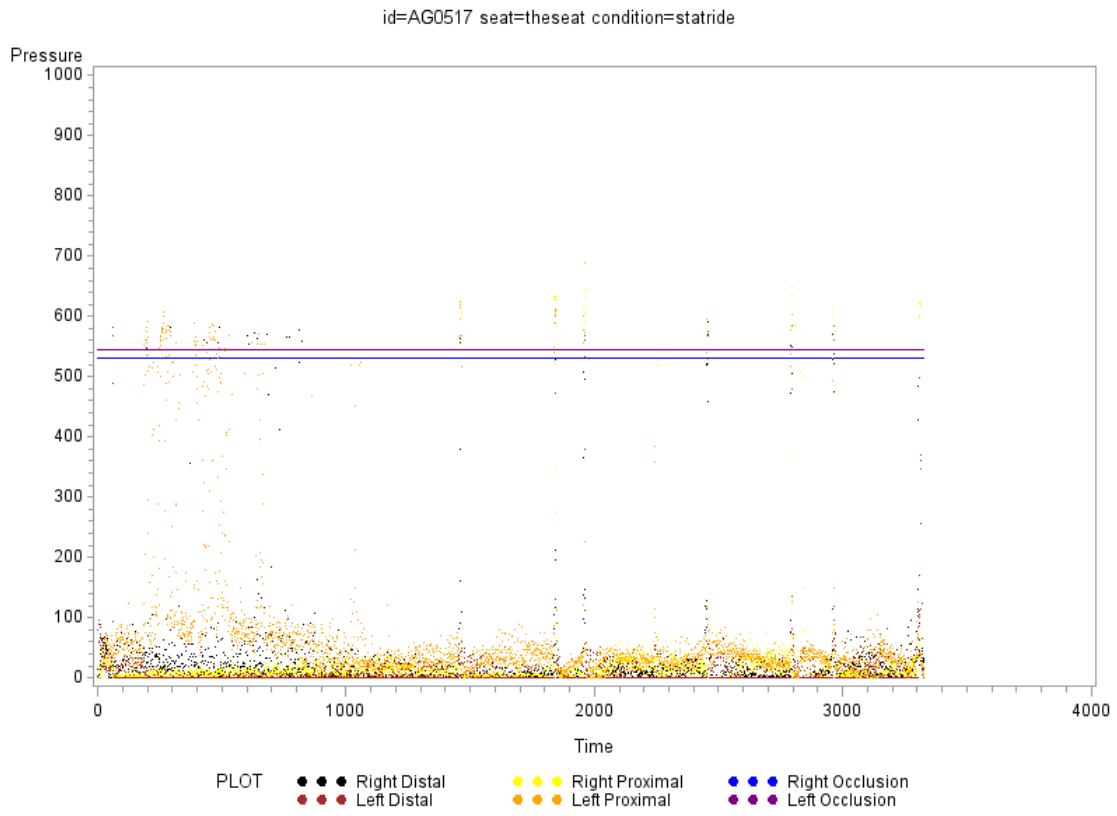

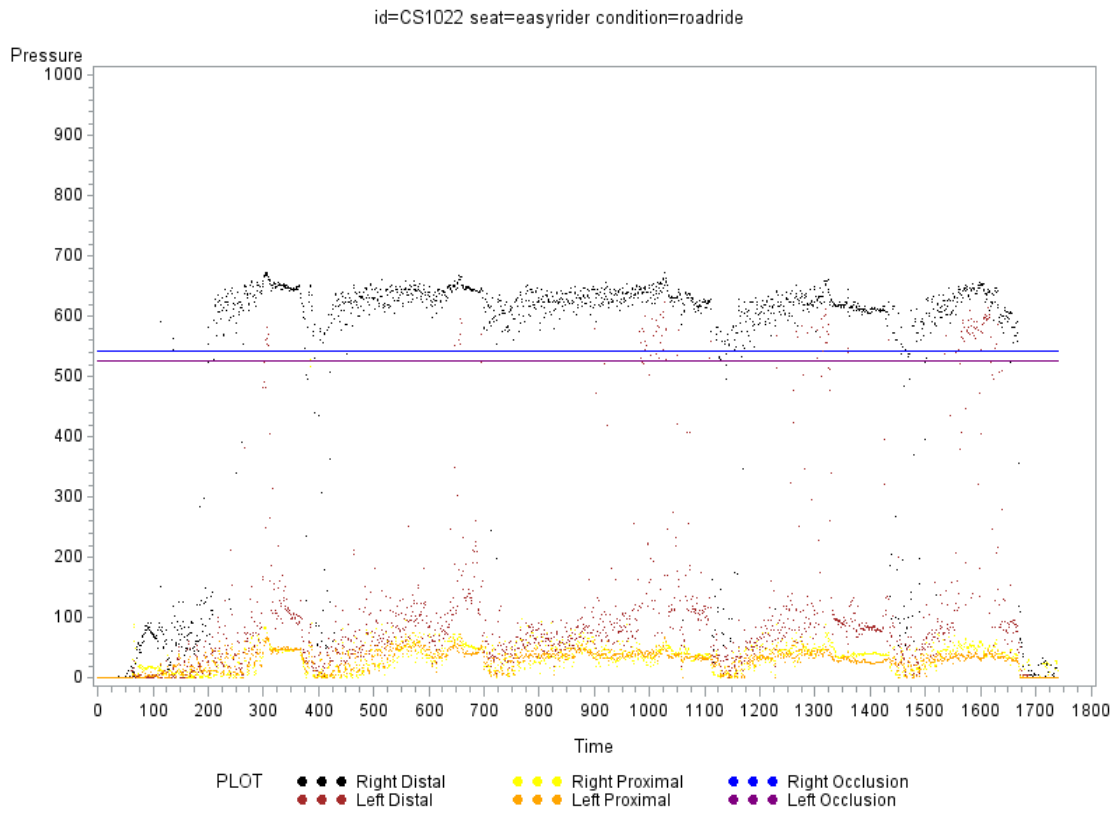

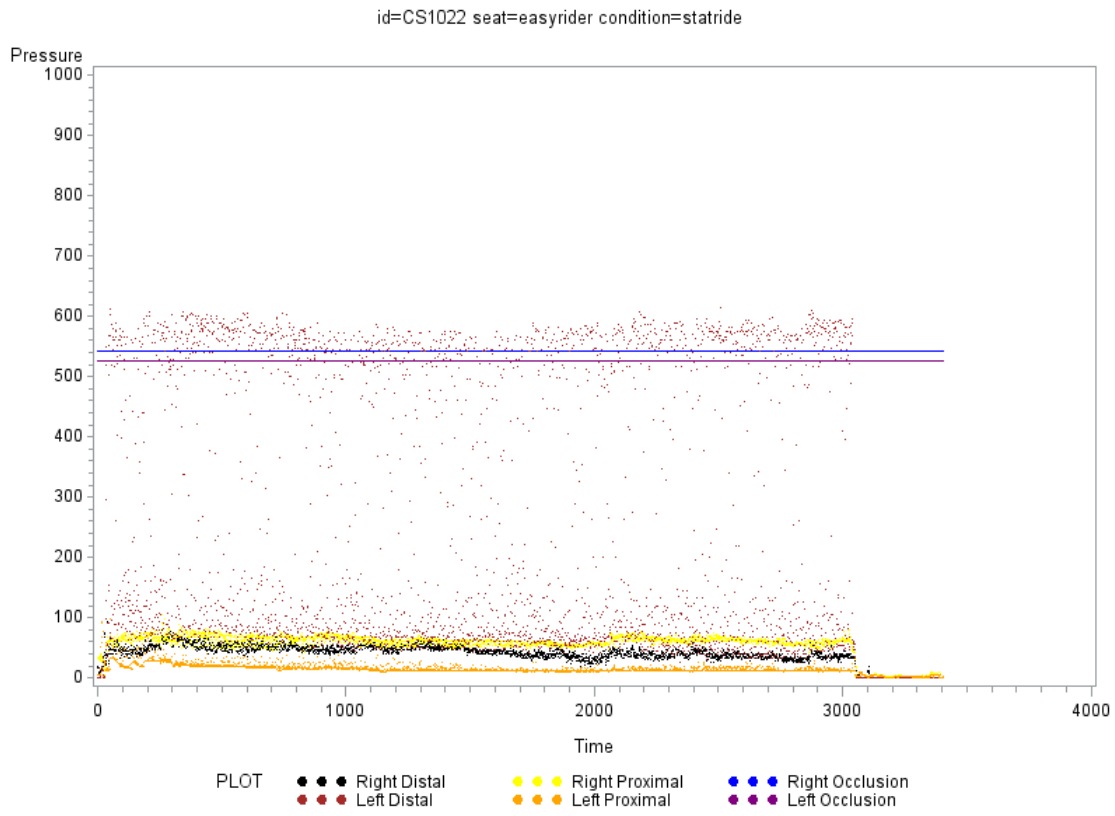

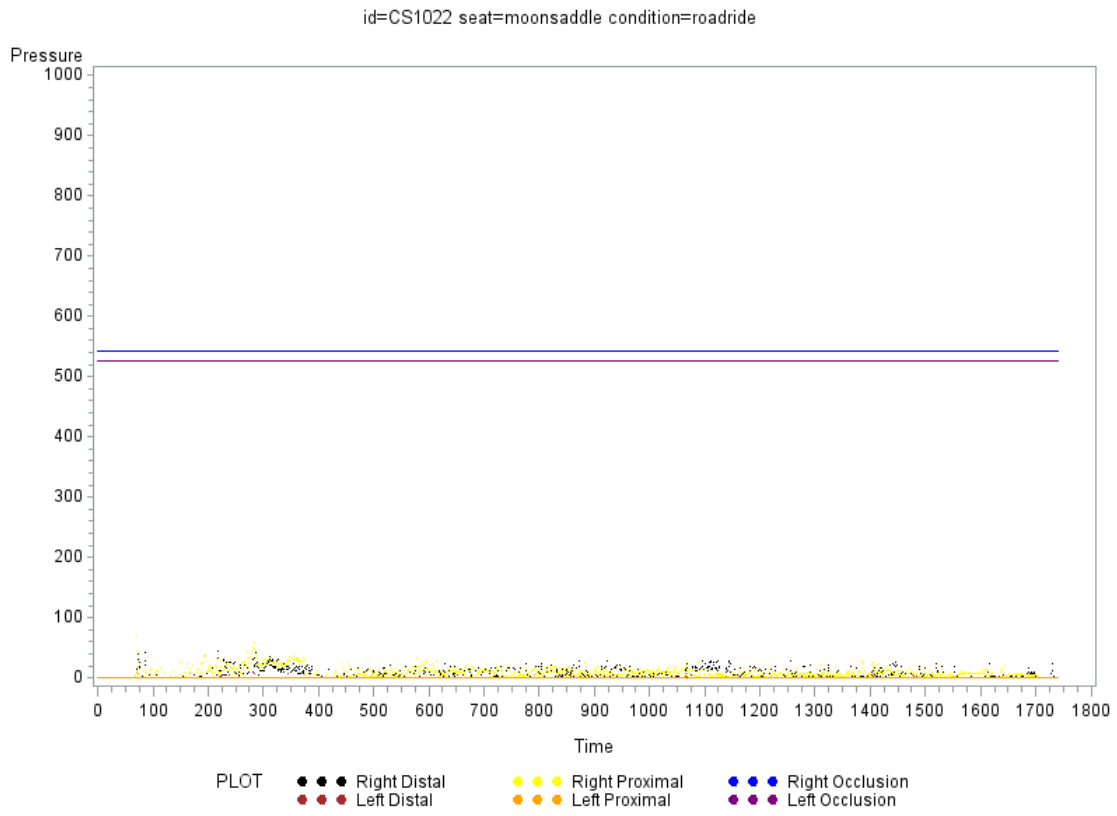

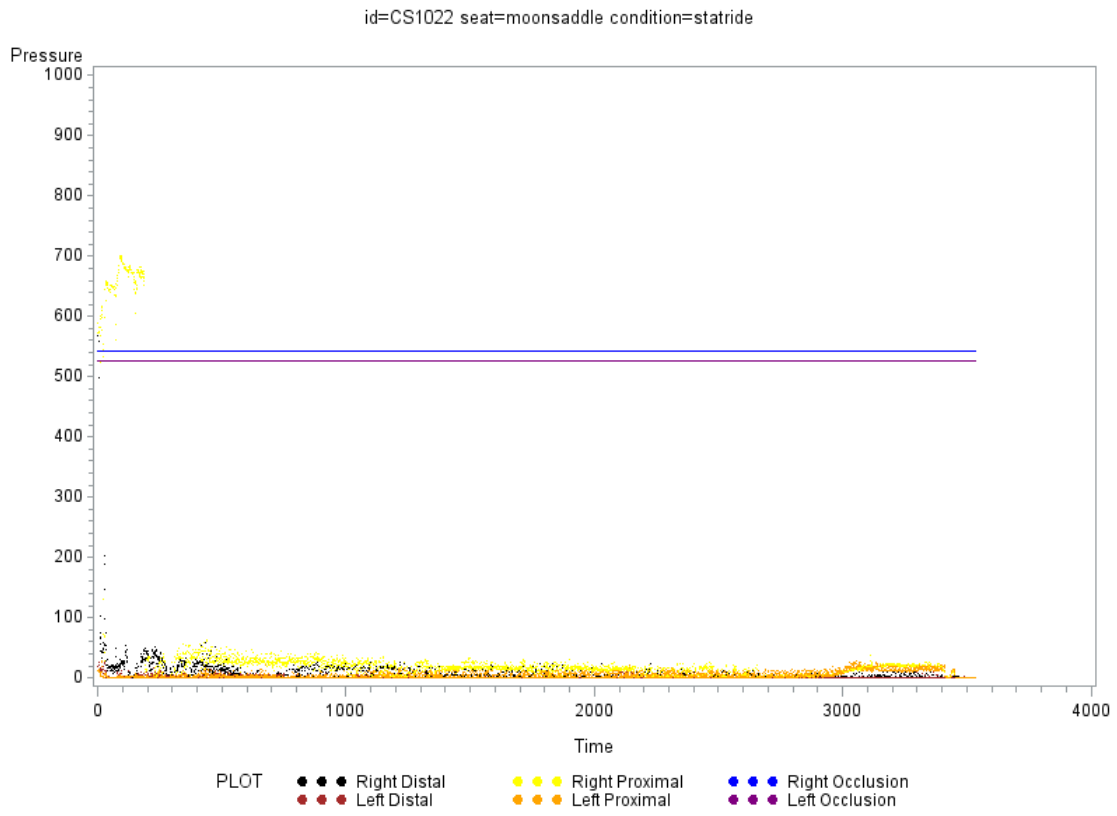



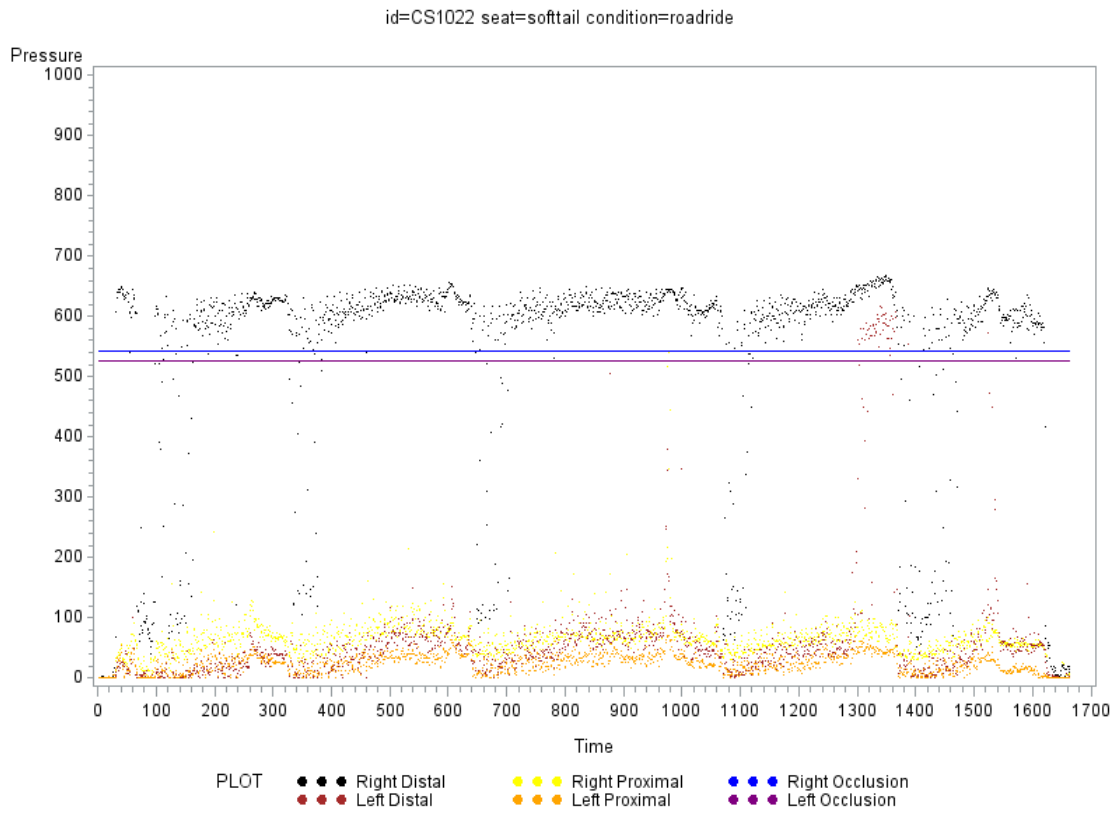

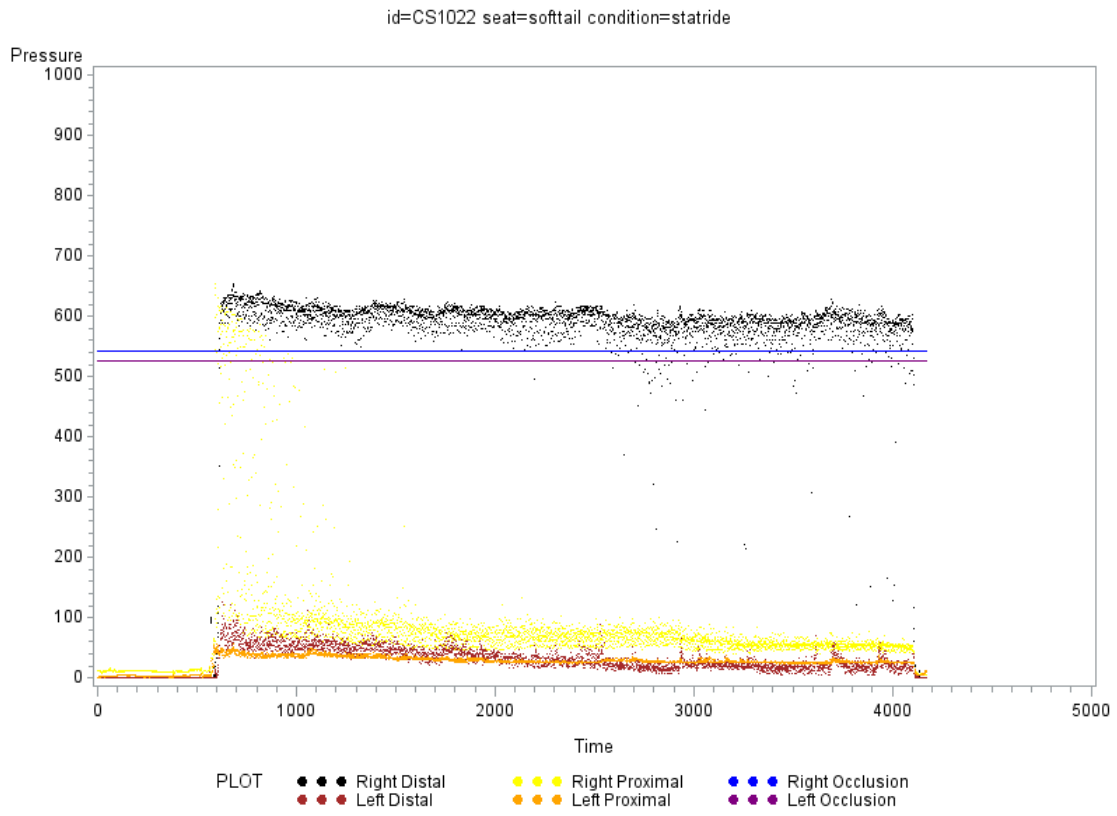

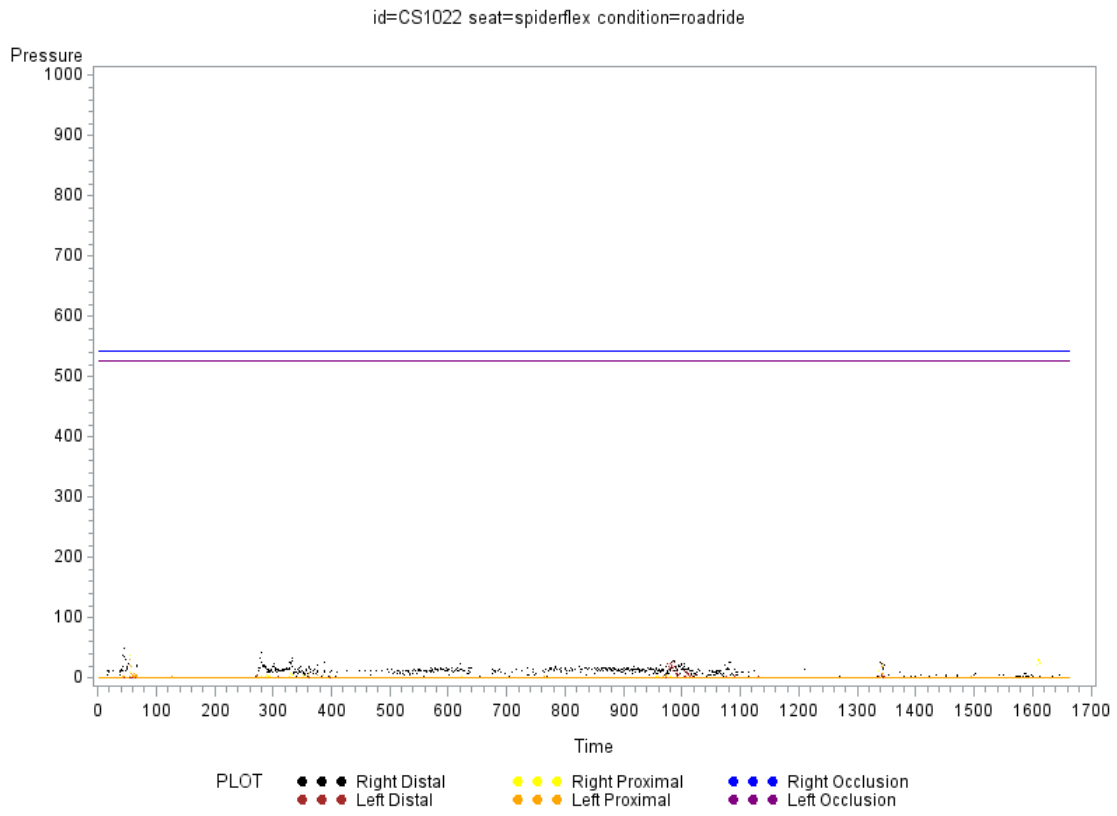

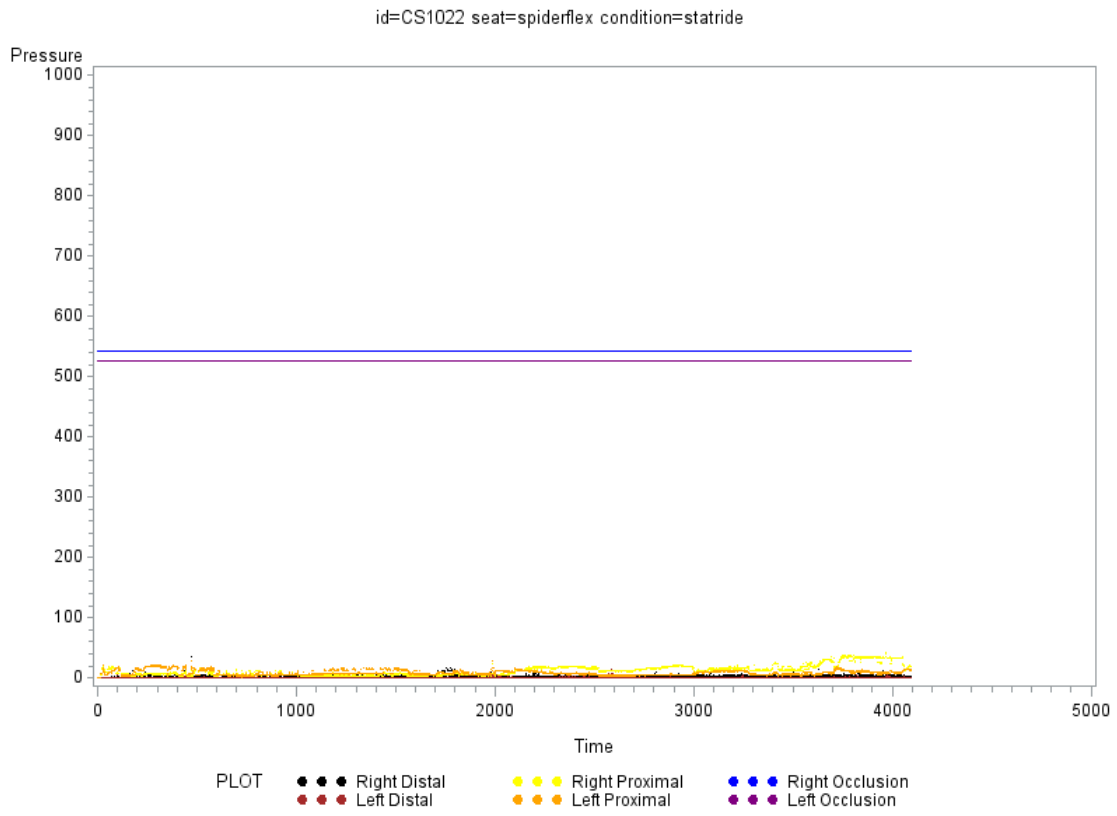

id=CS1022 seat=standard condition=roadride

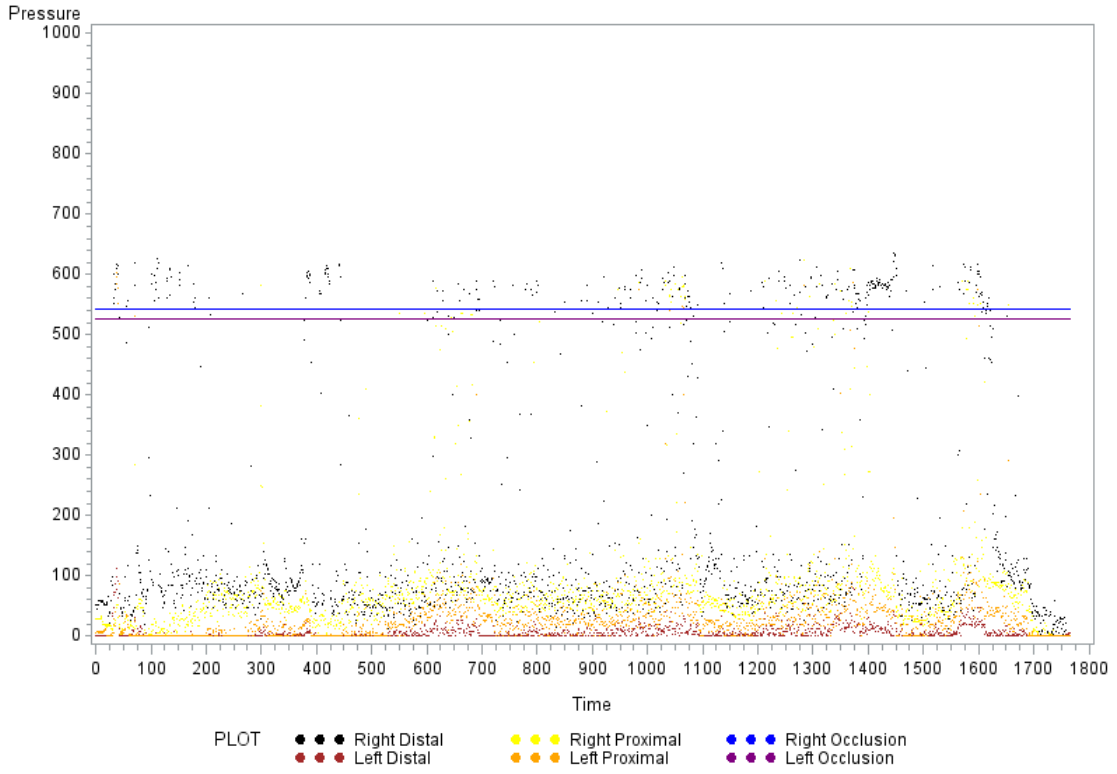

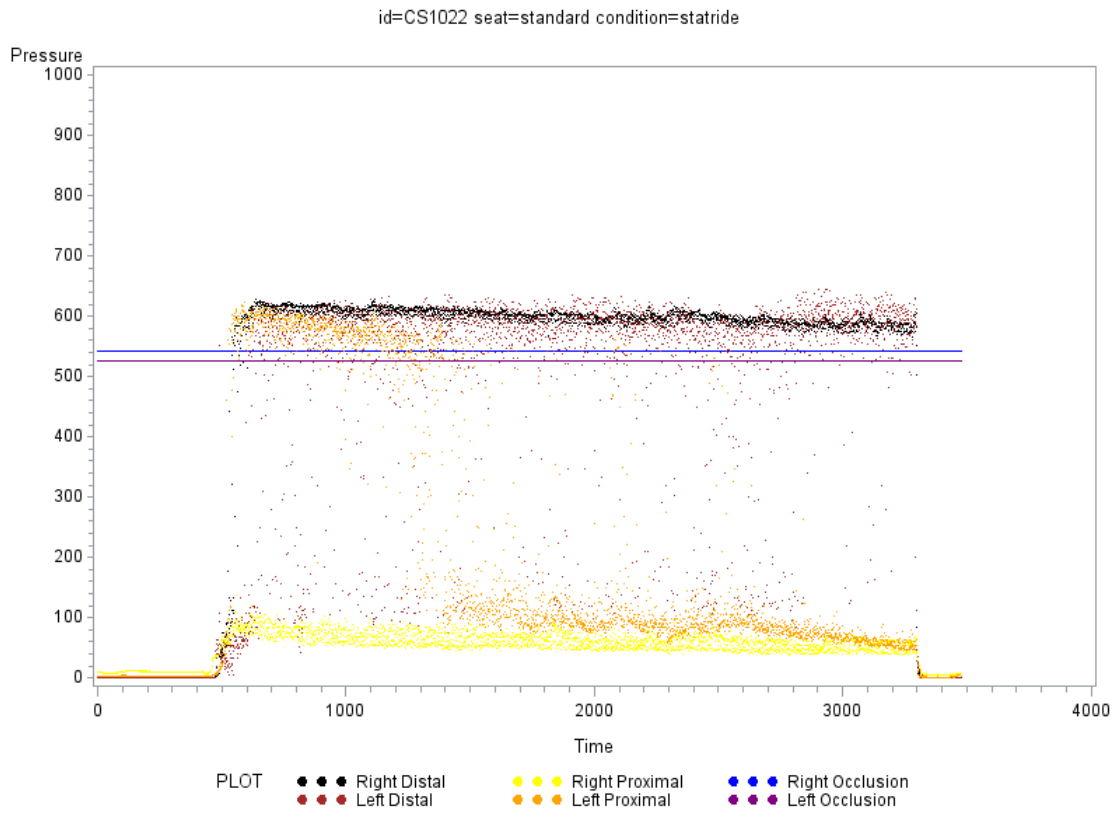

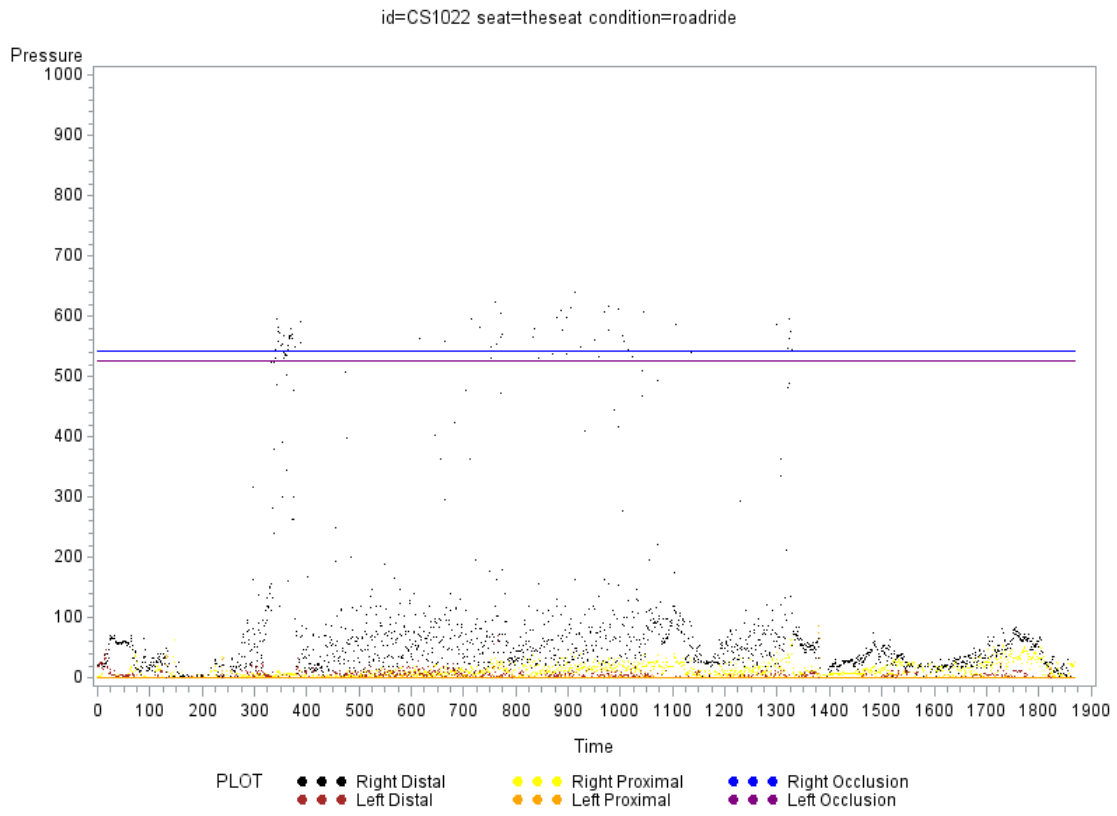

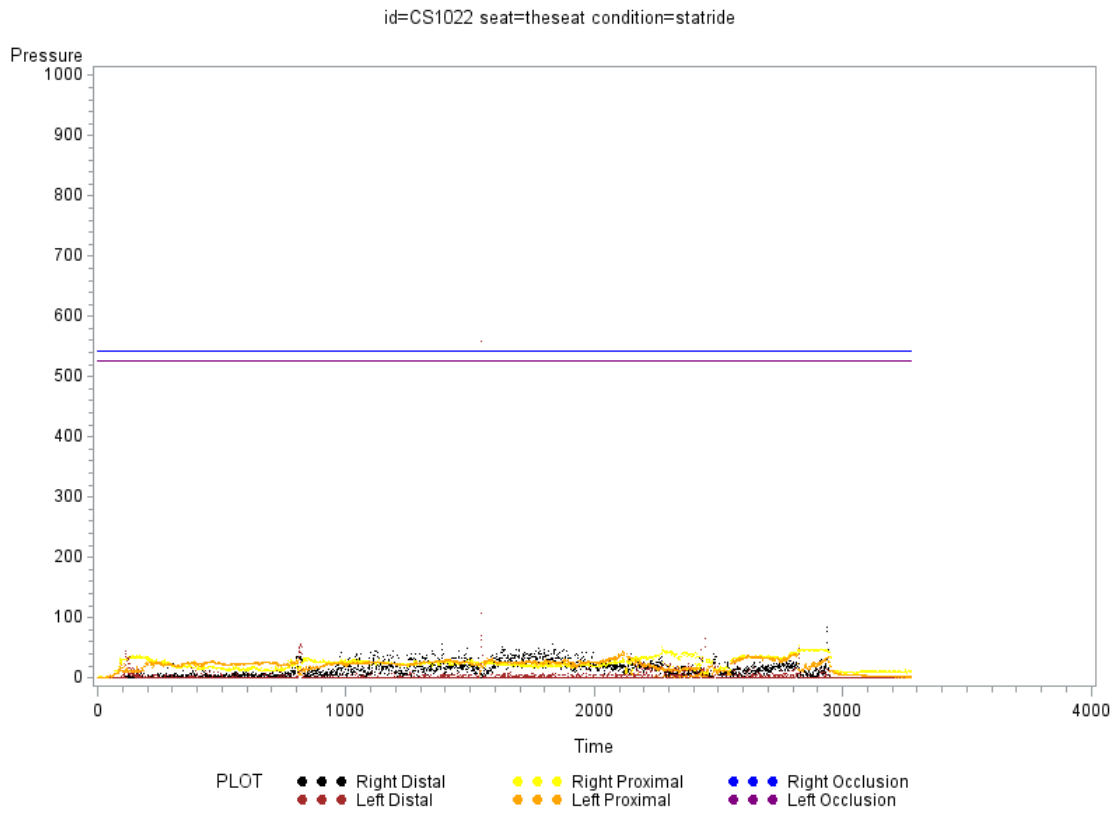



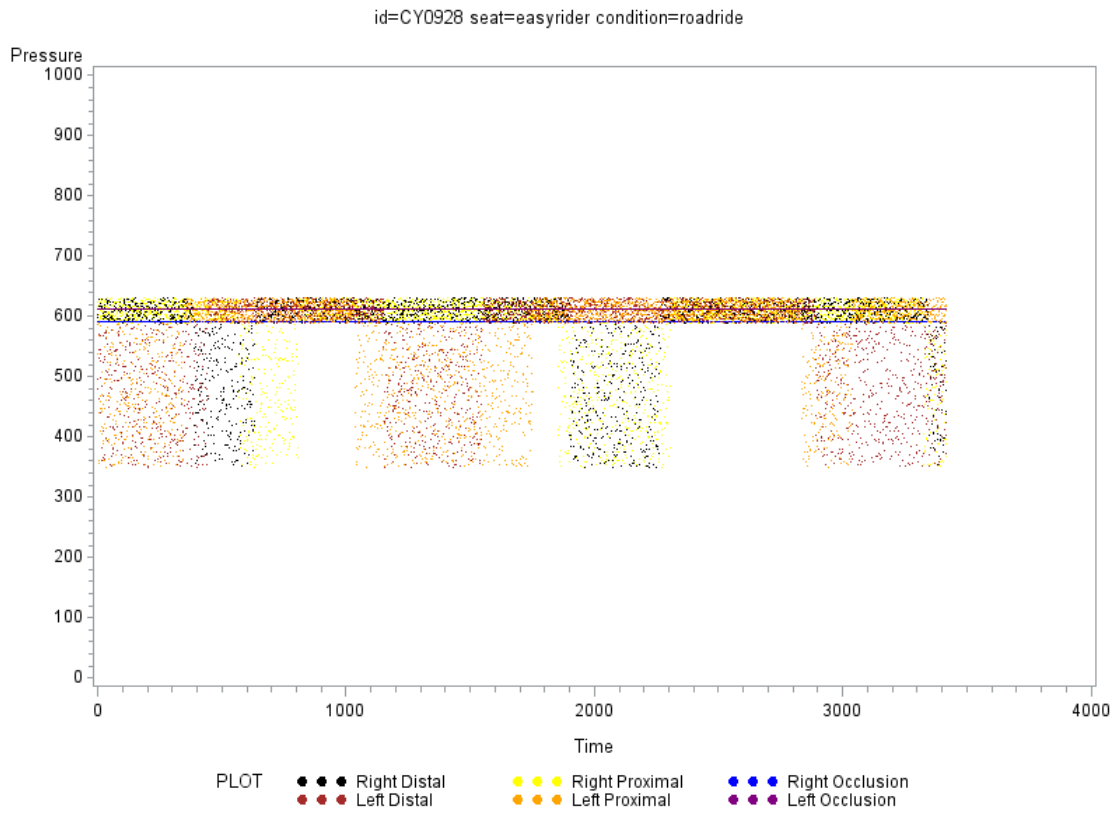

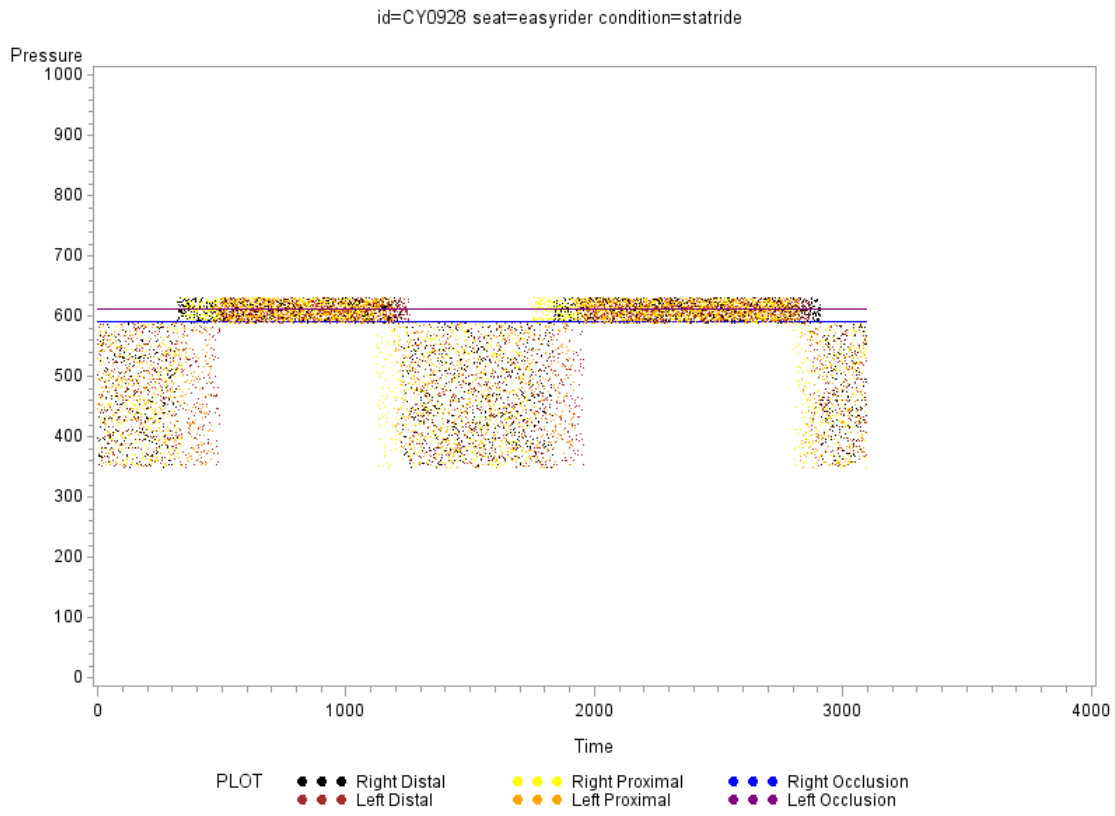

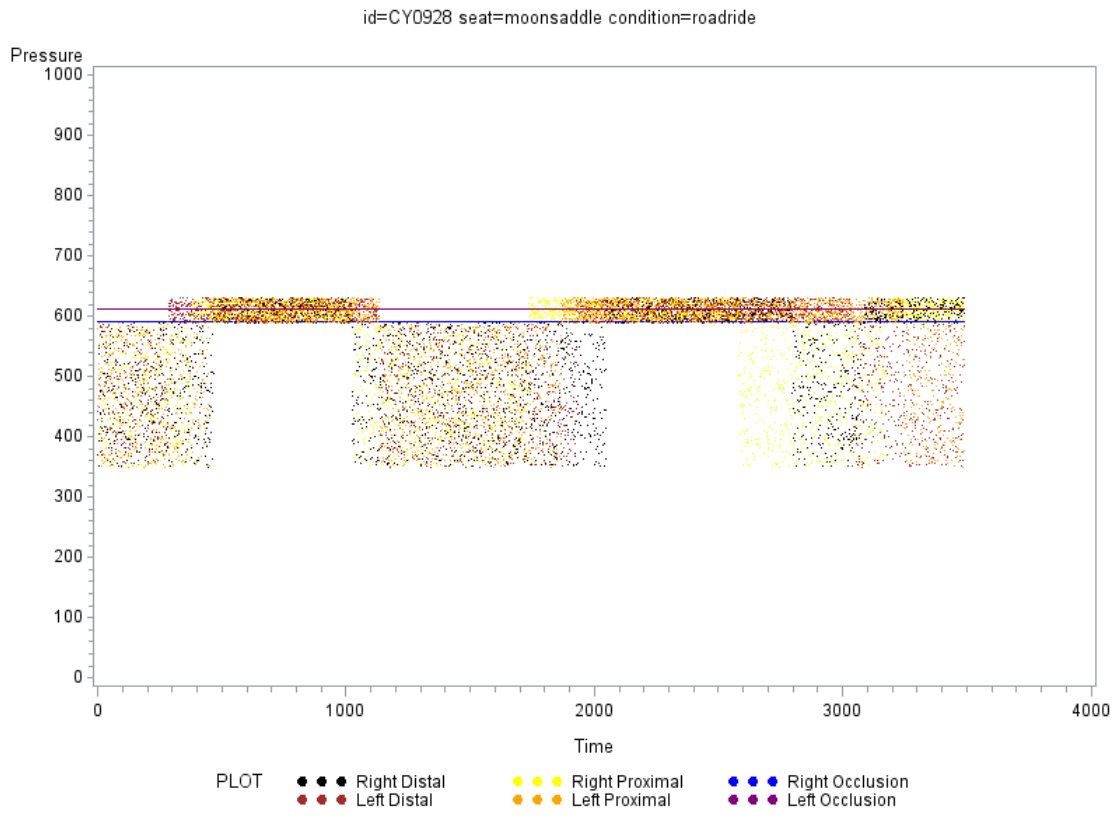

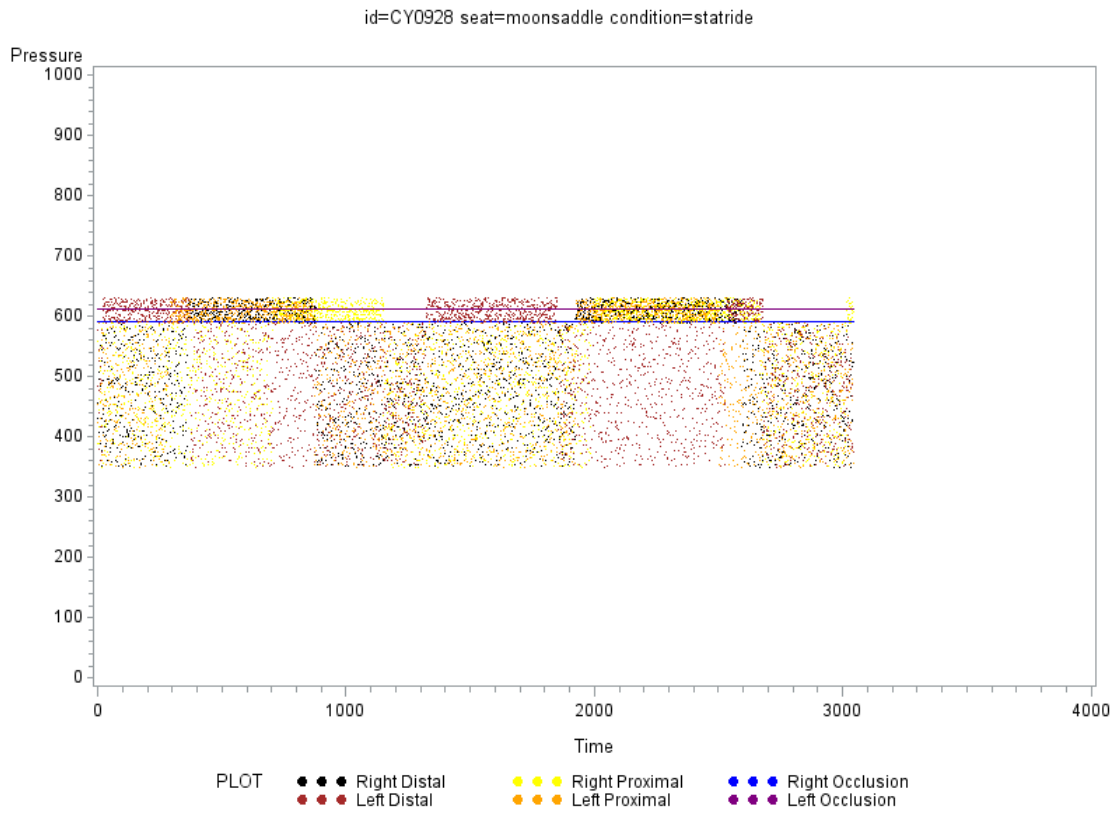

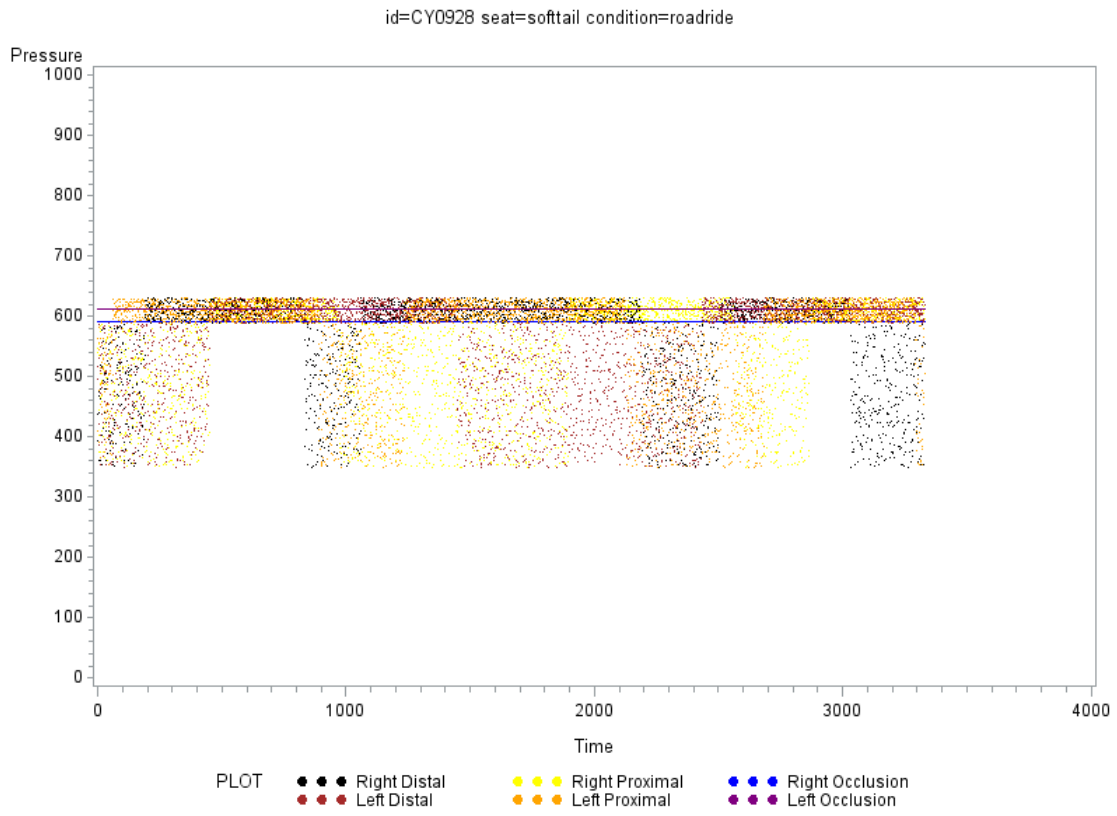

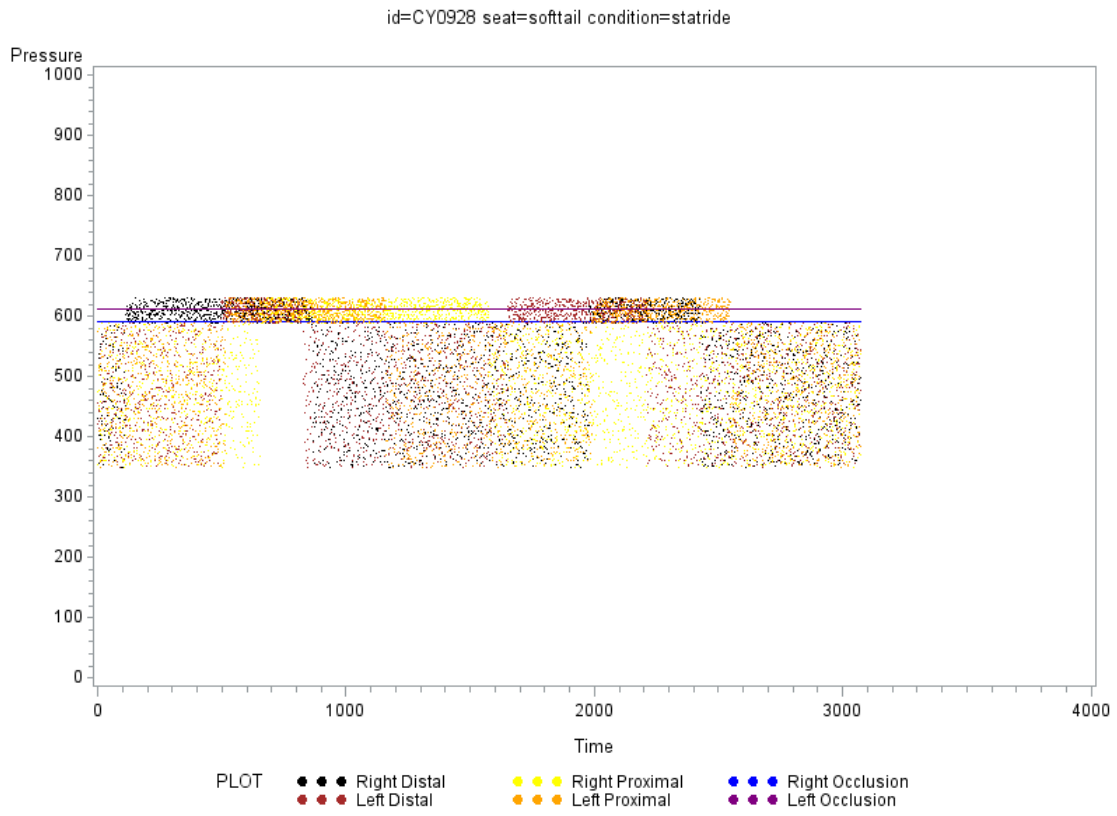

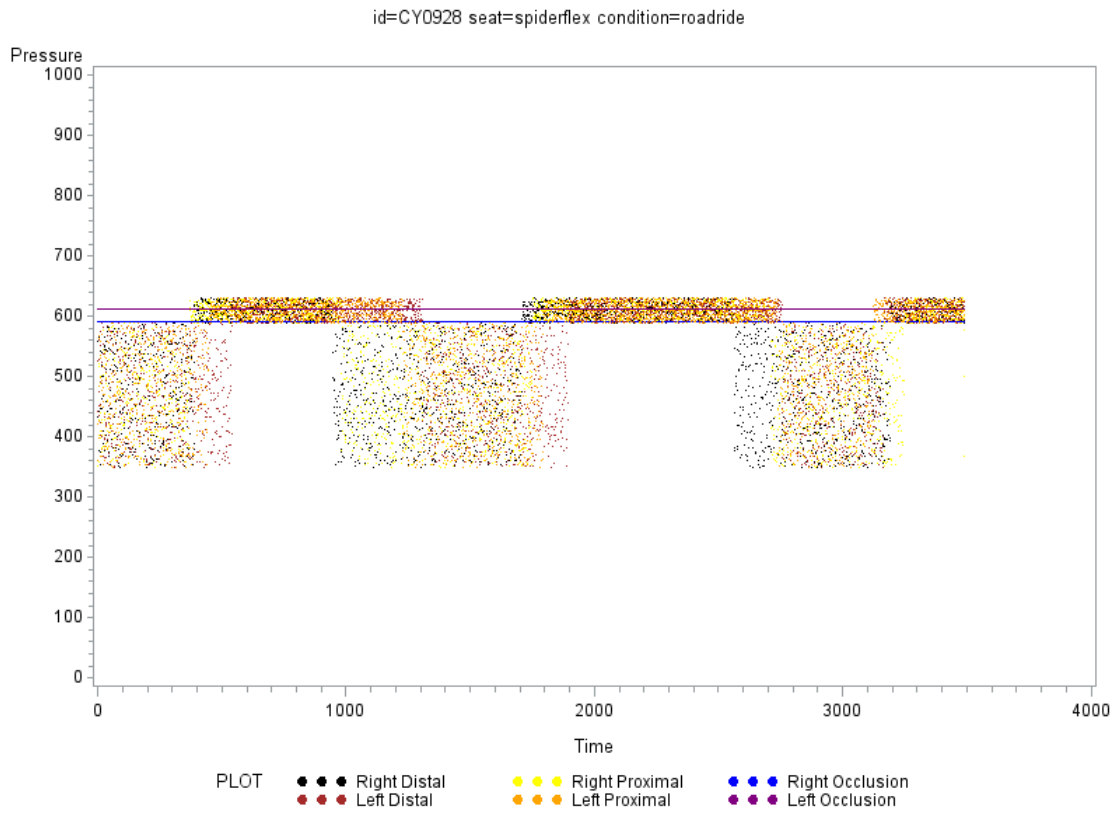

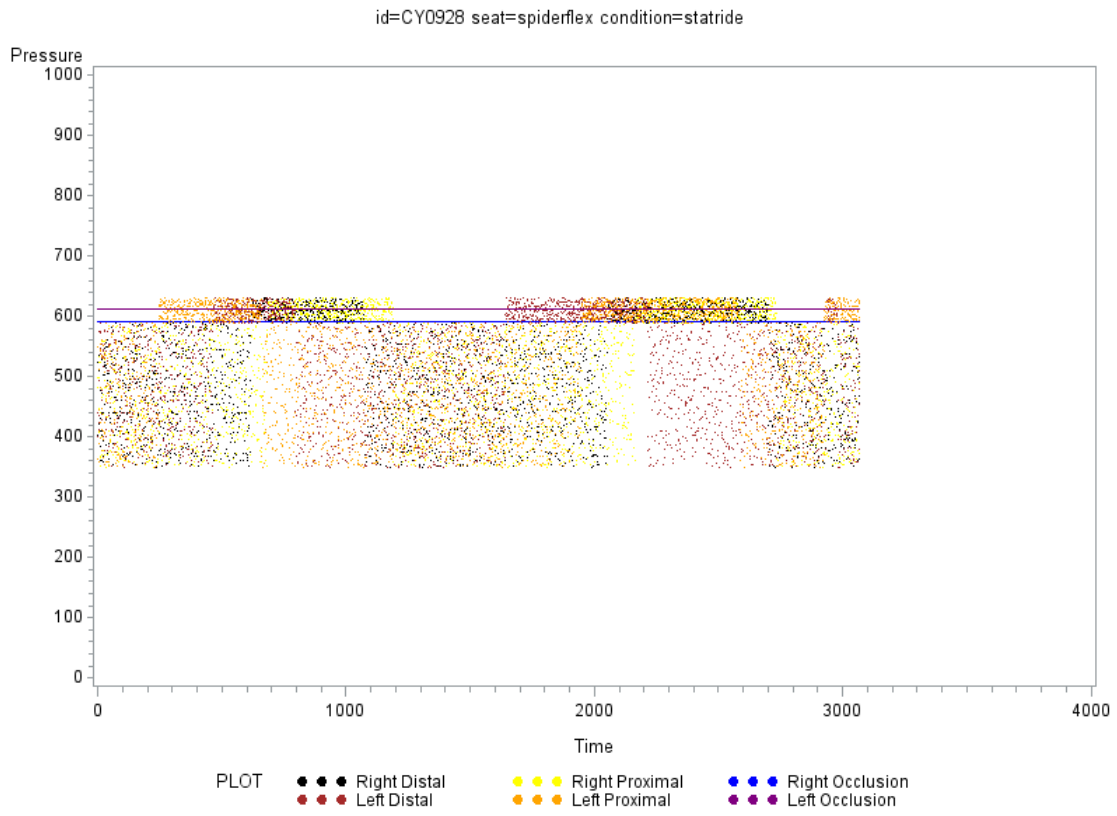



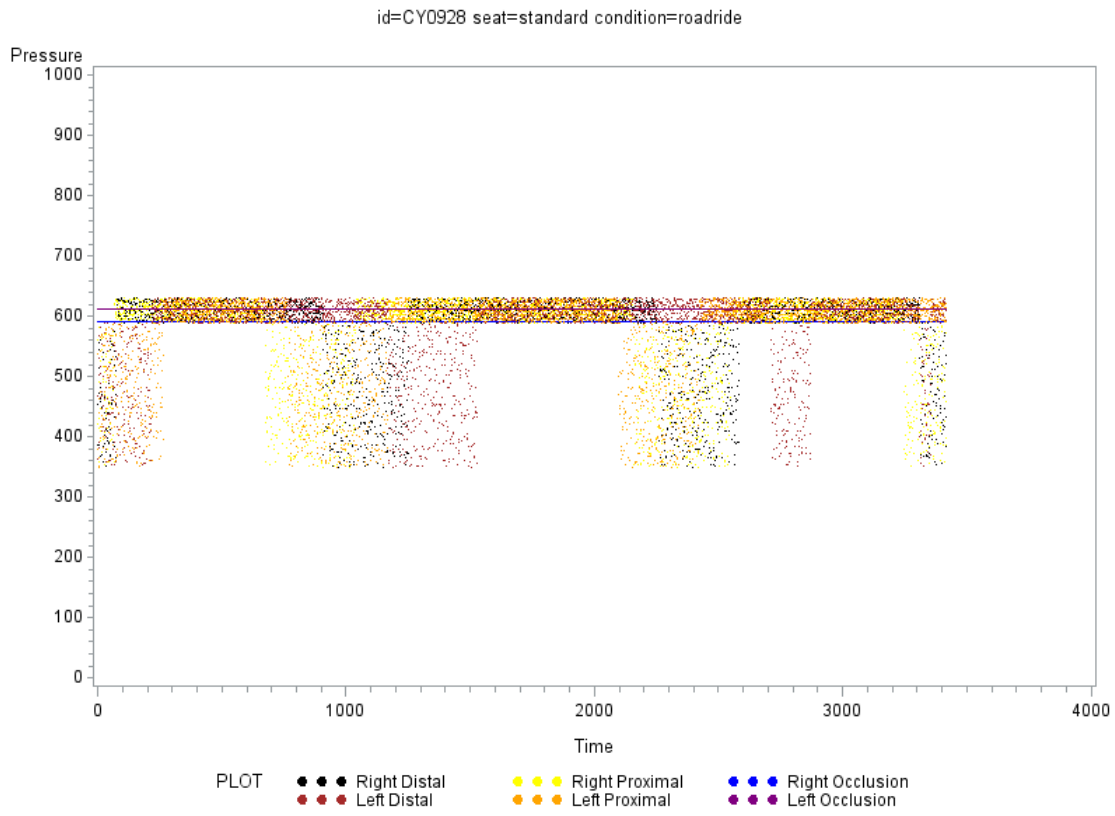

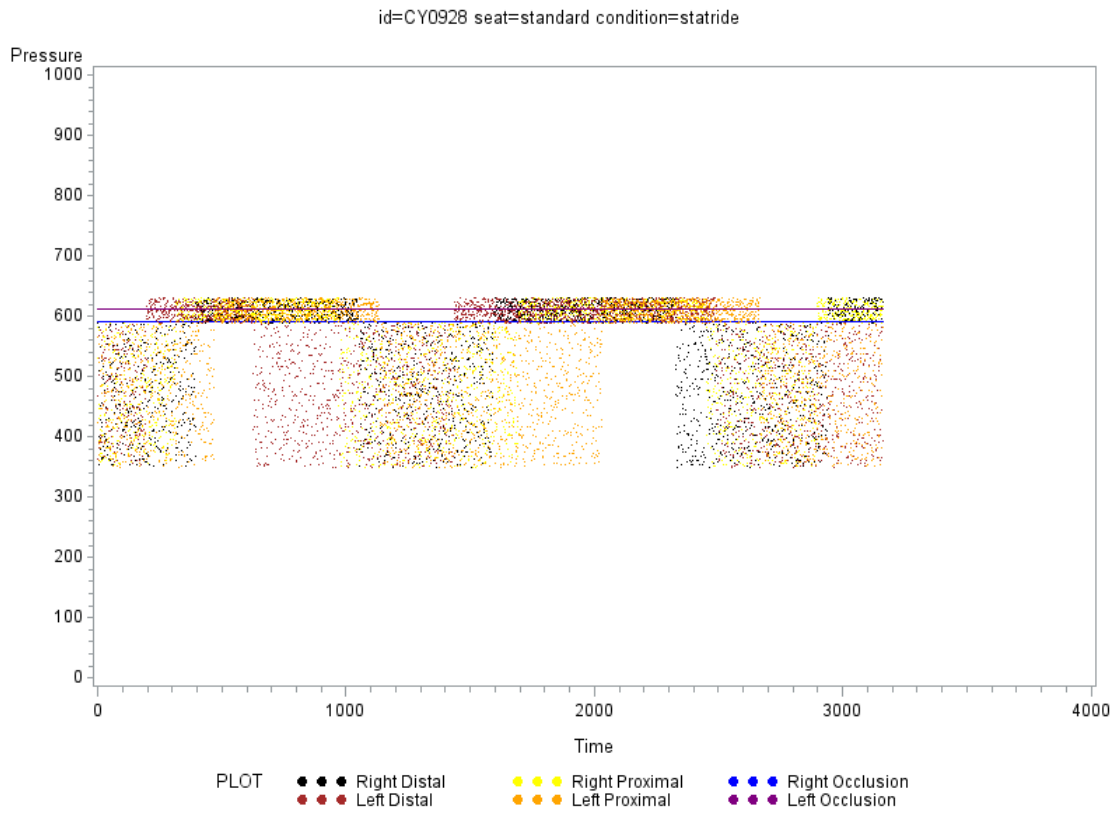

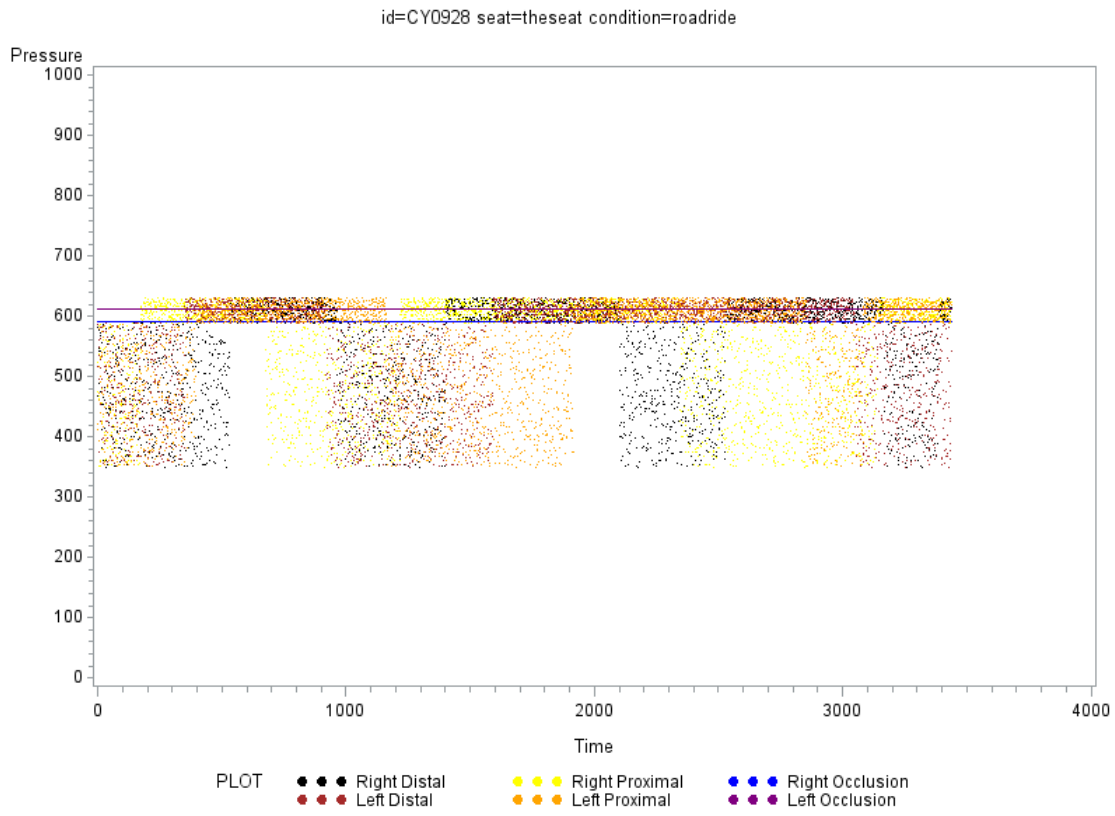

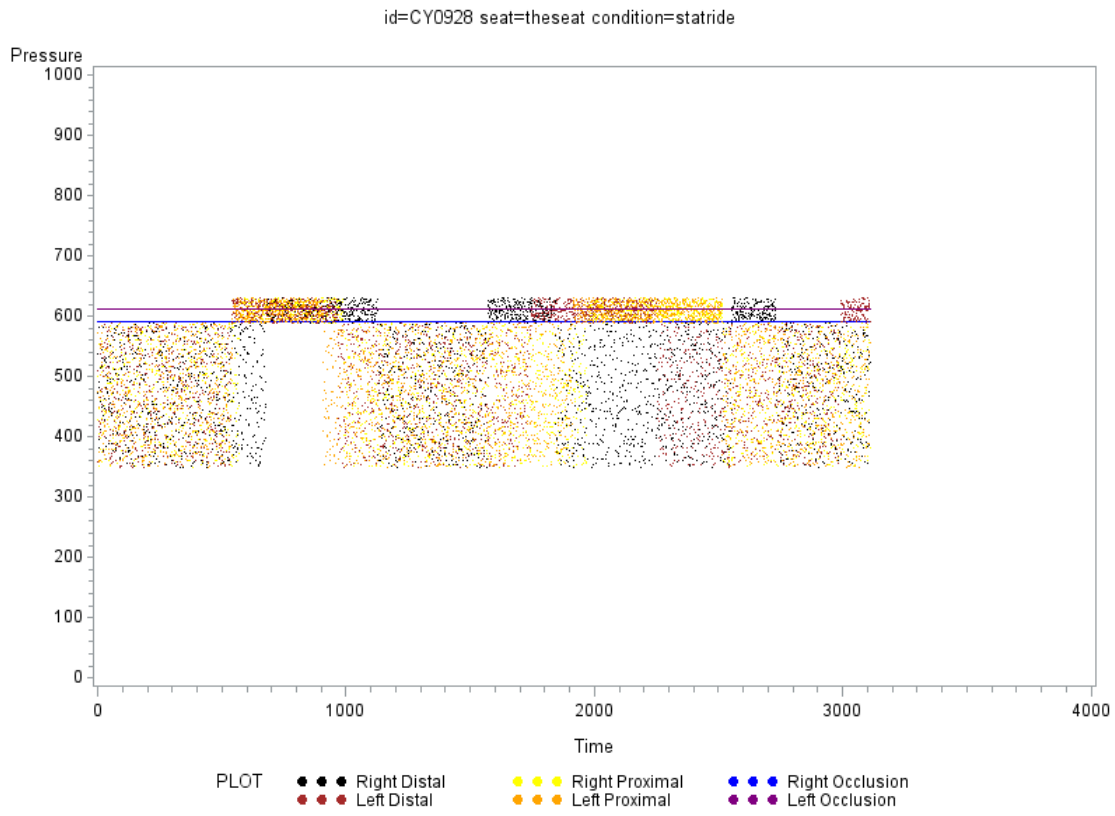

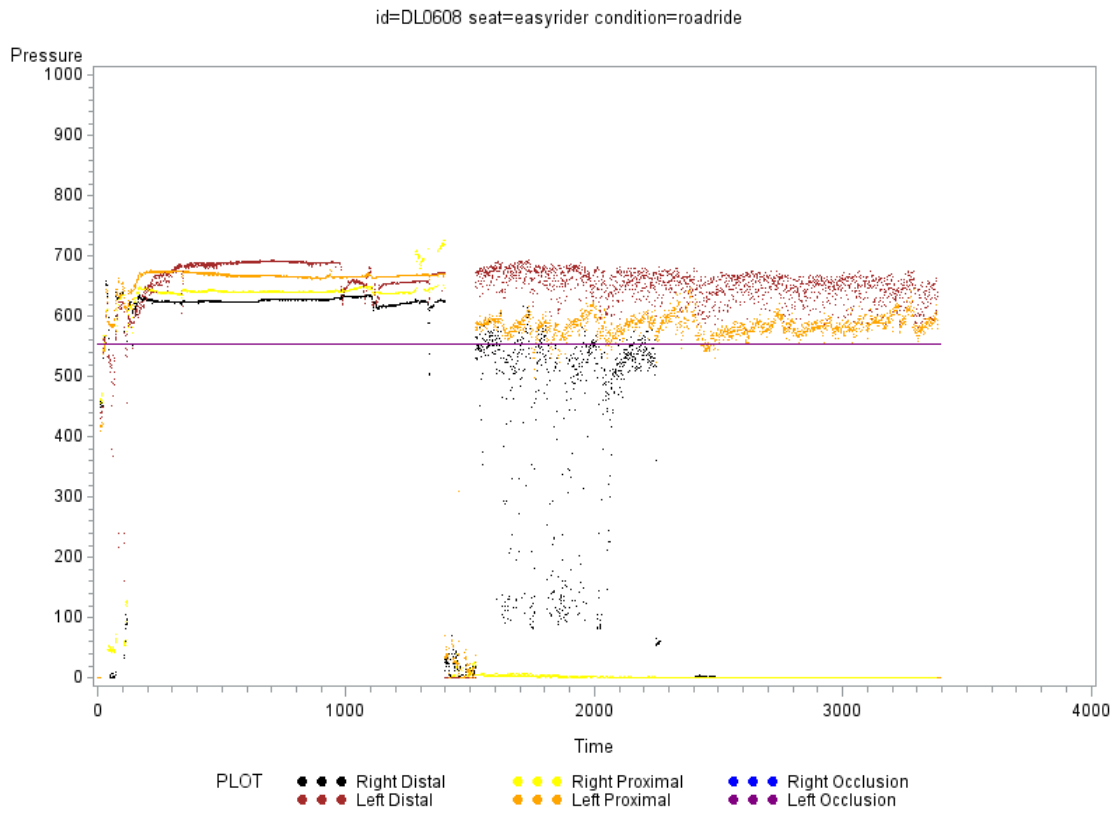

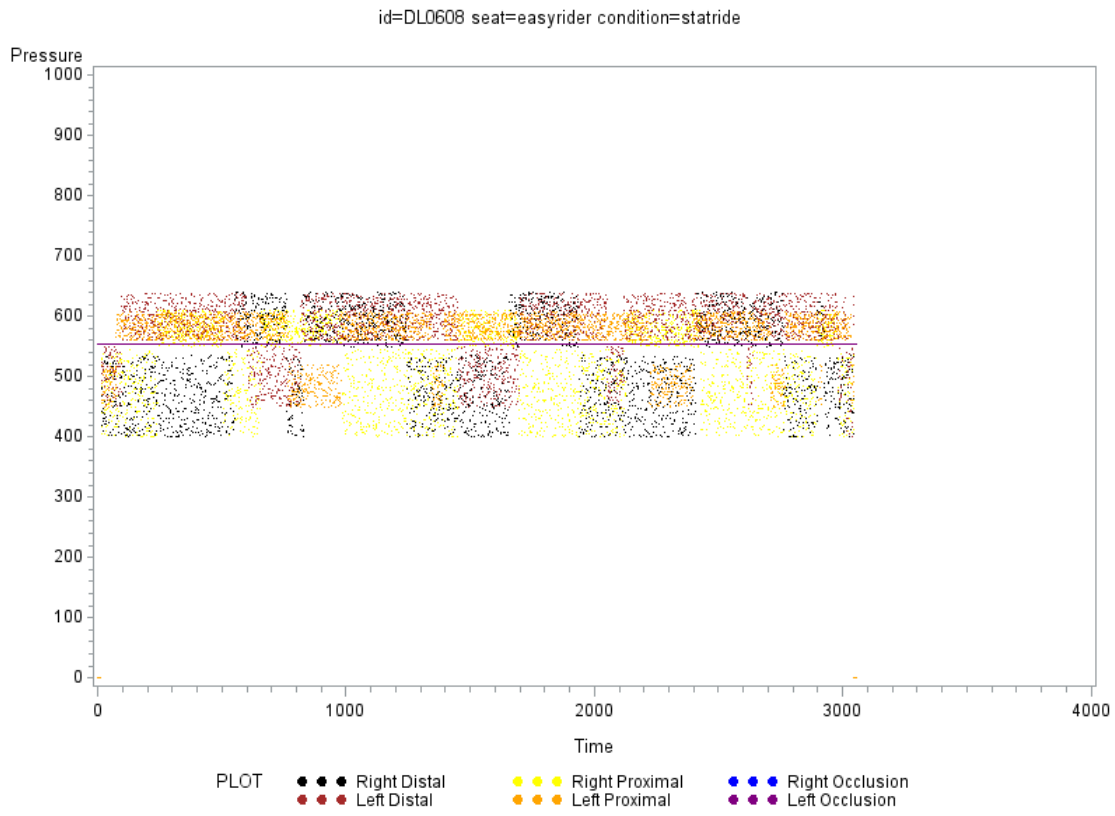

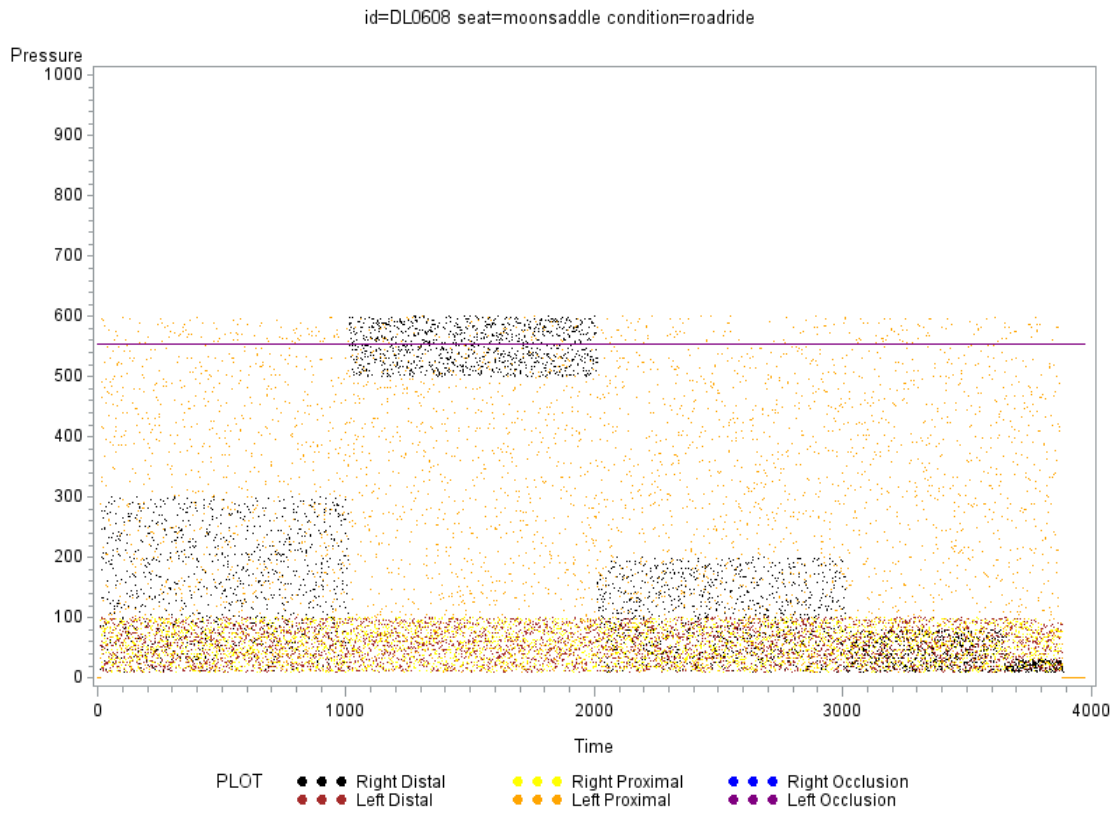

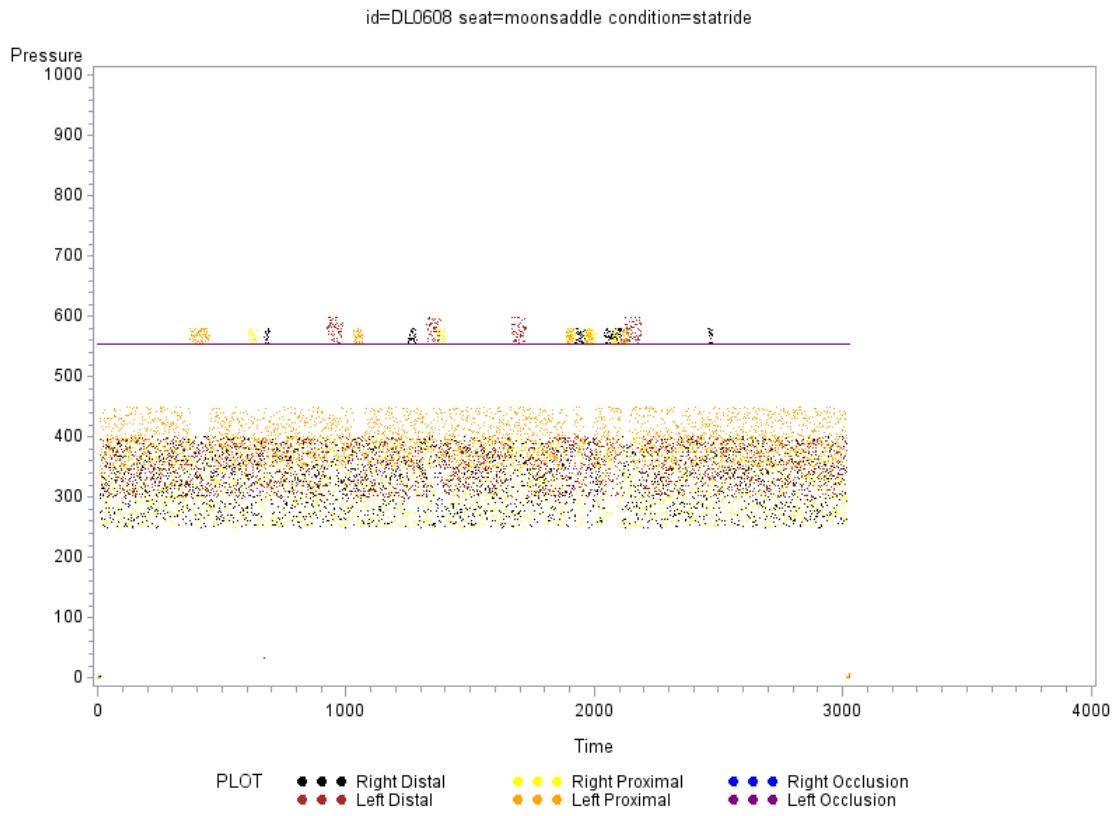



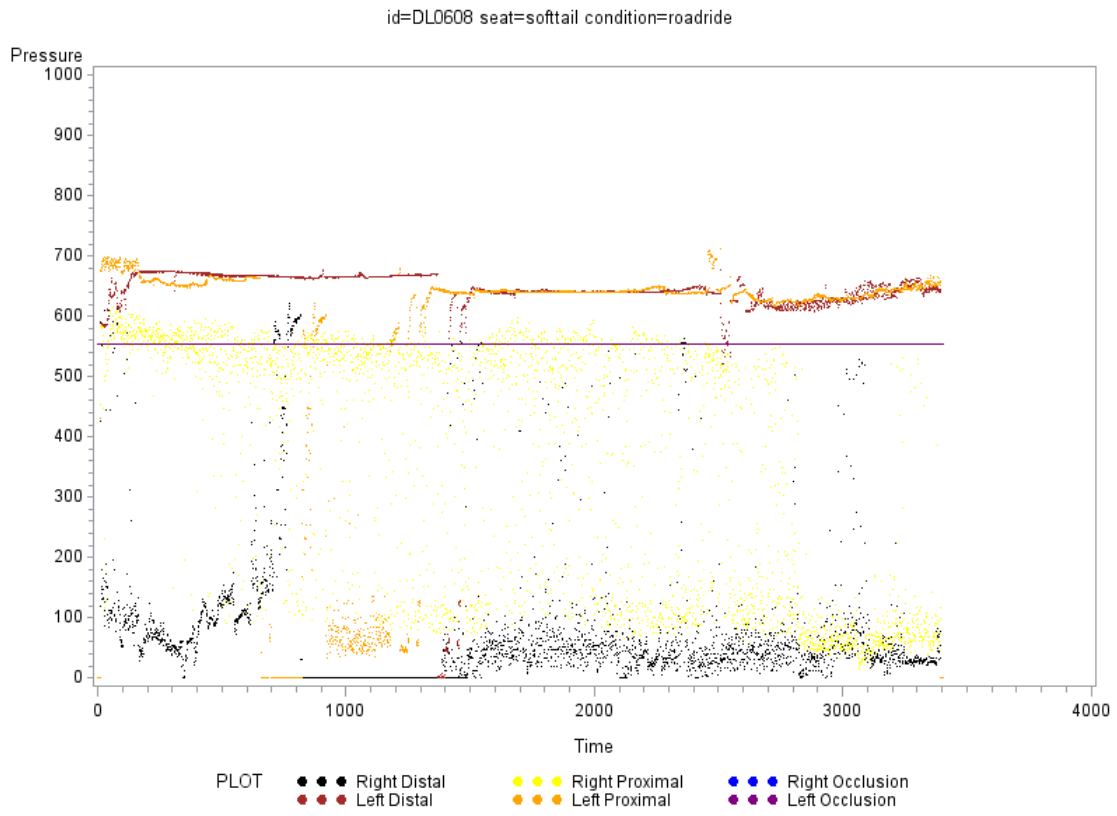

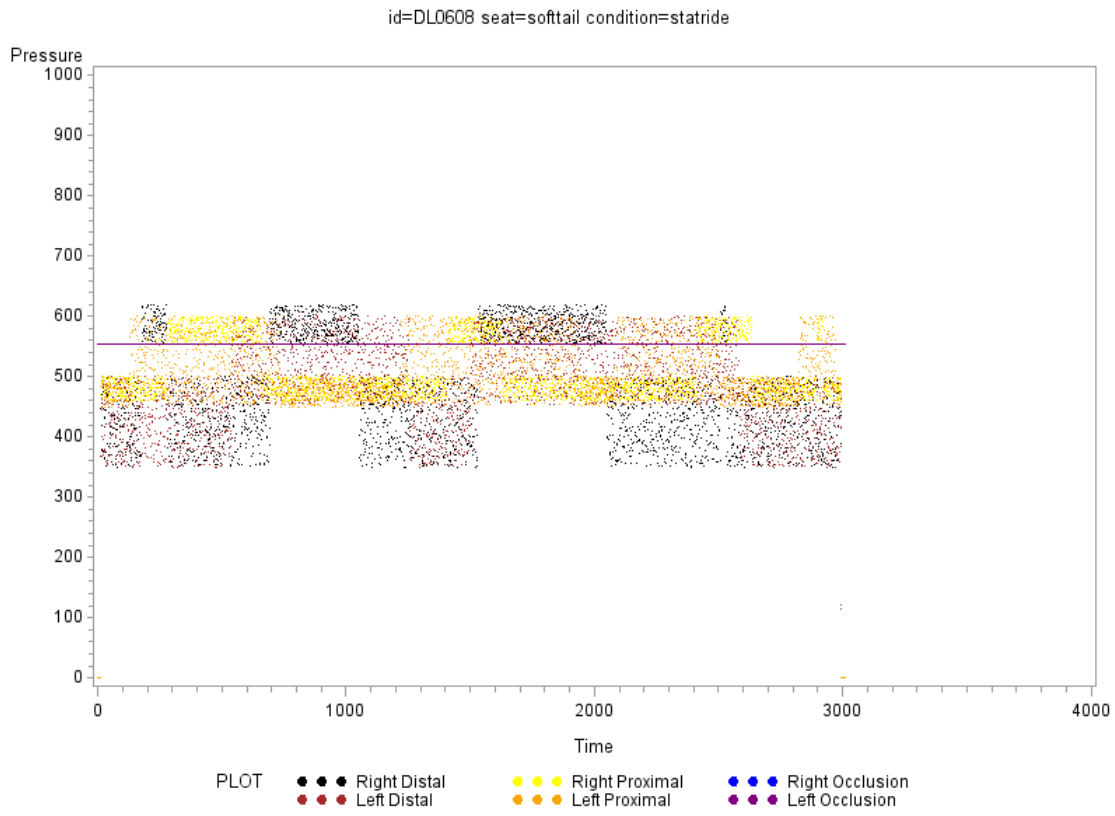

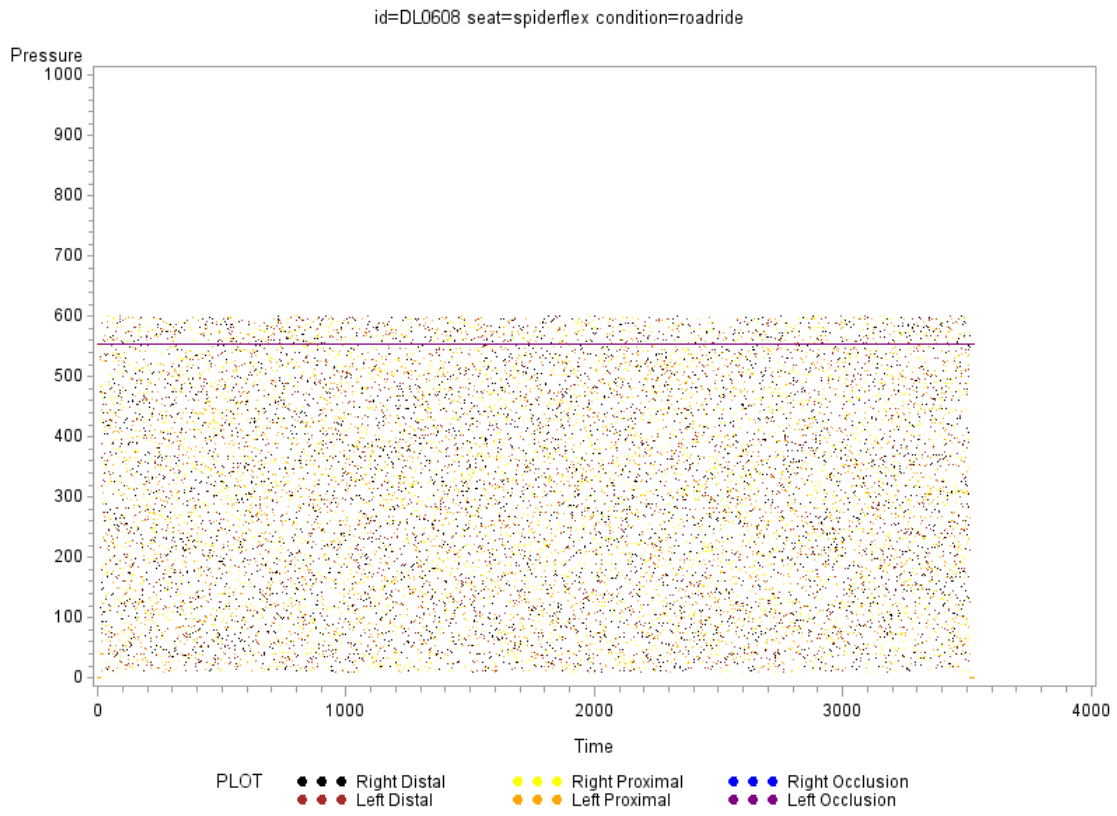

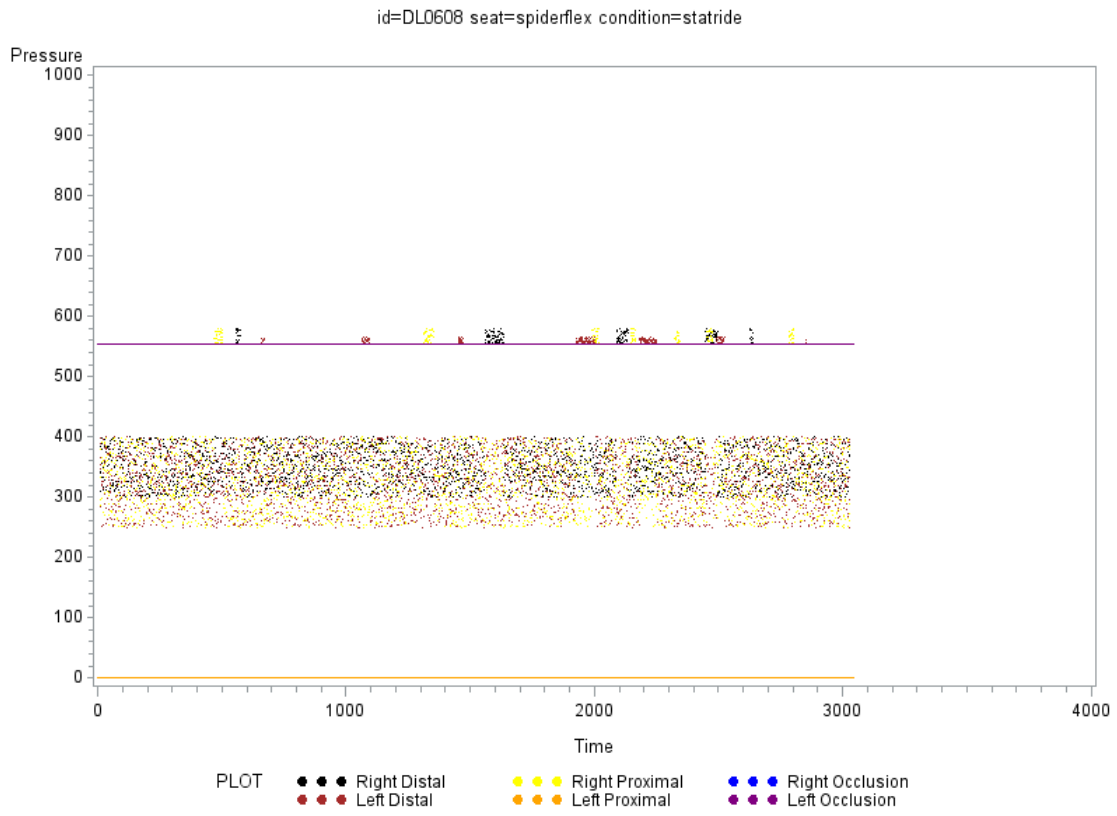

id=DL0608 seat=standard condition=roadride

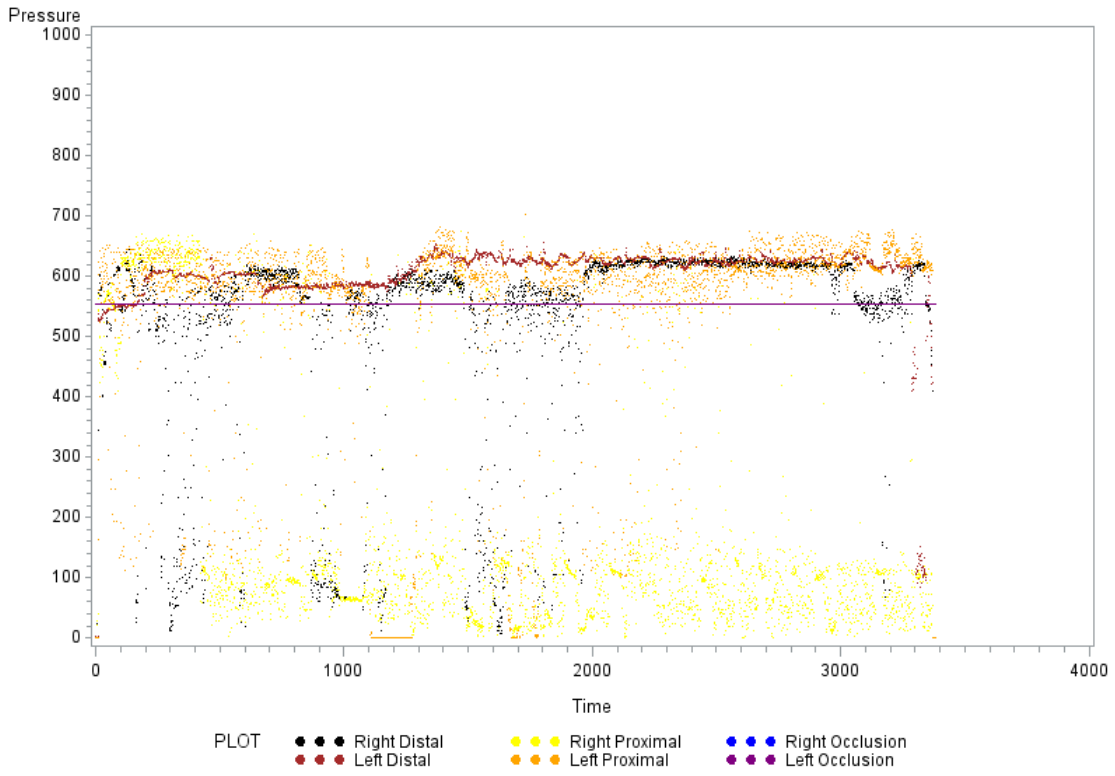

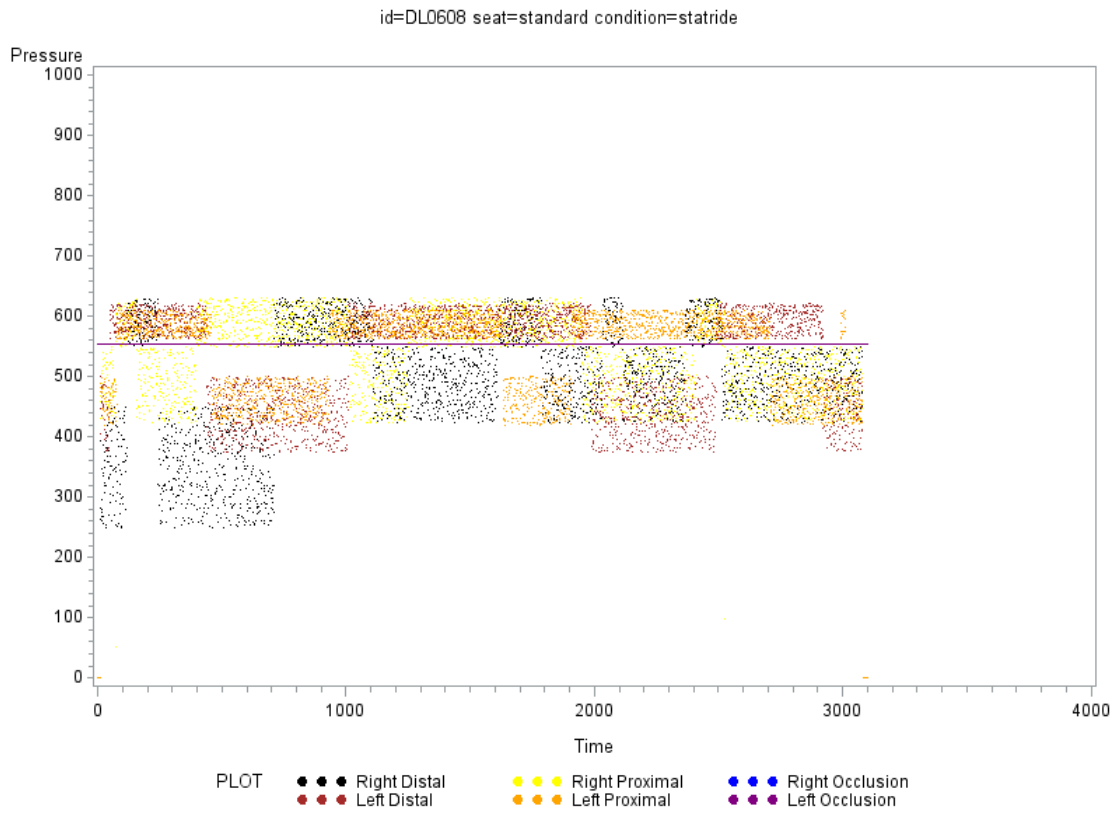

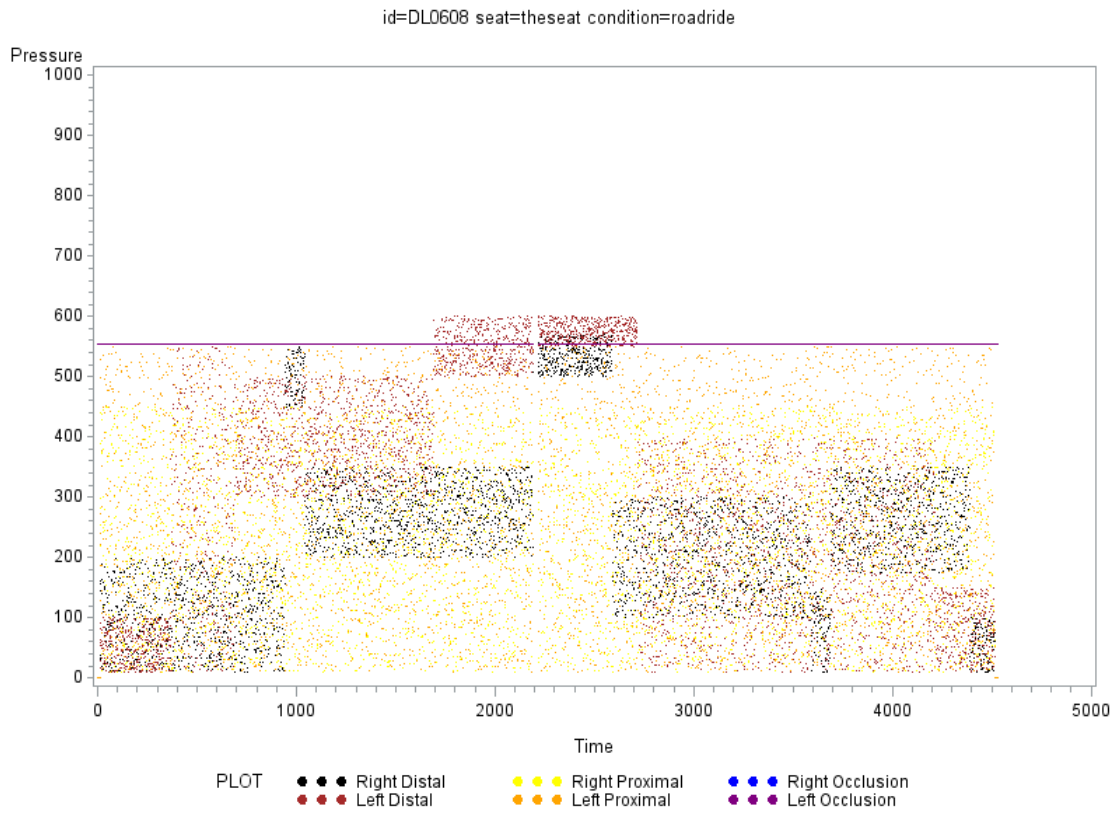

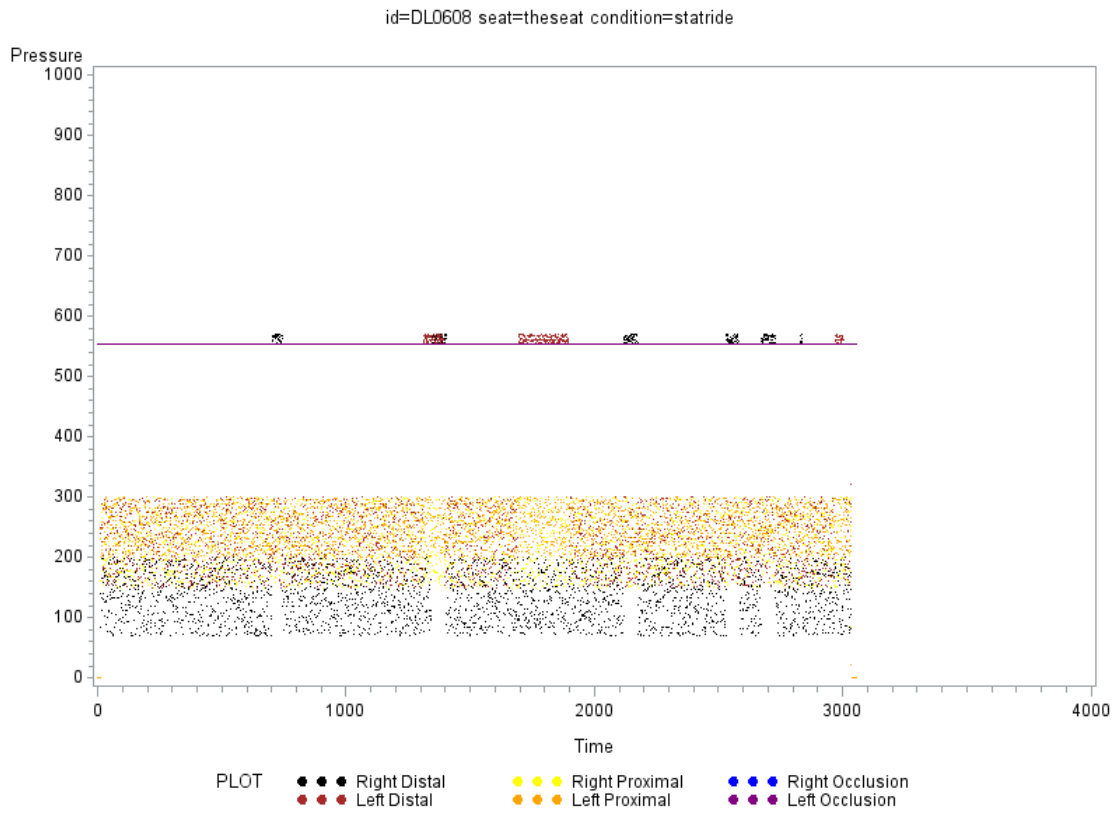



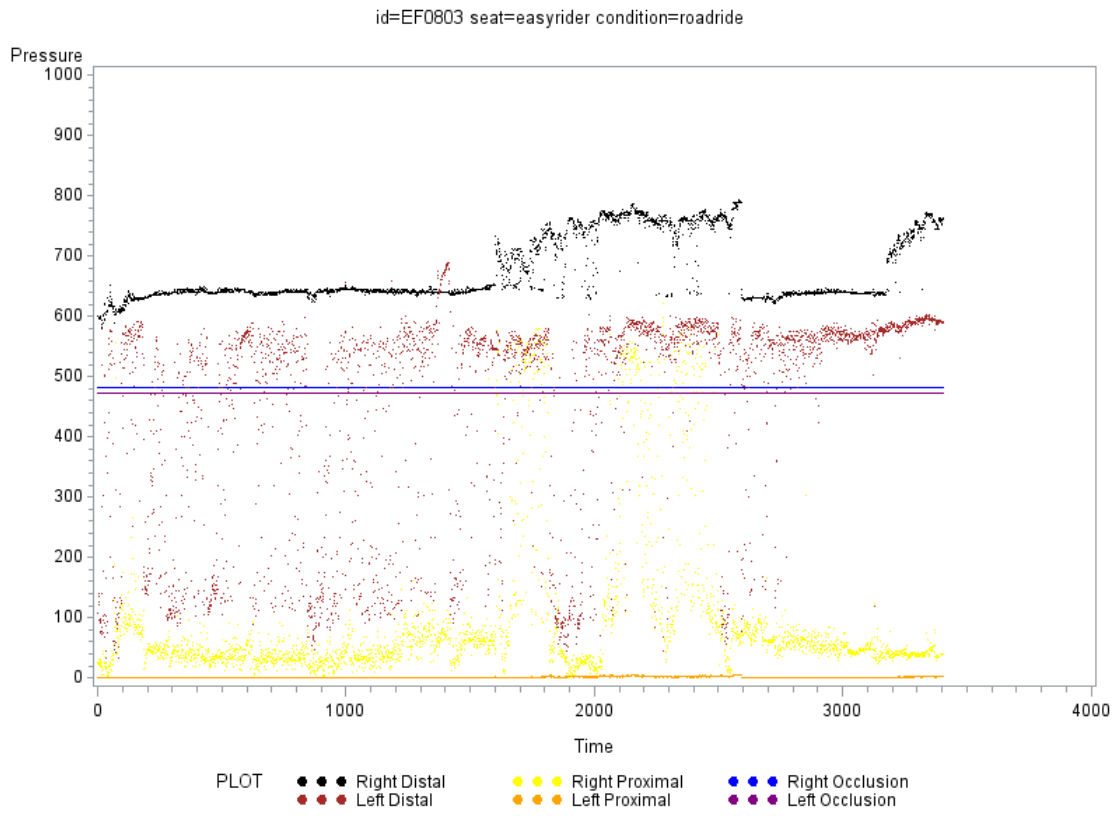

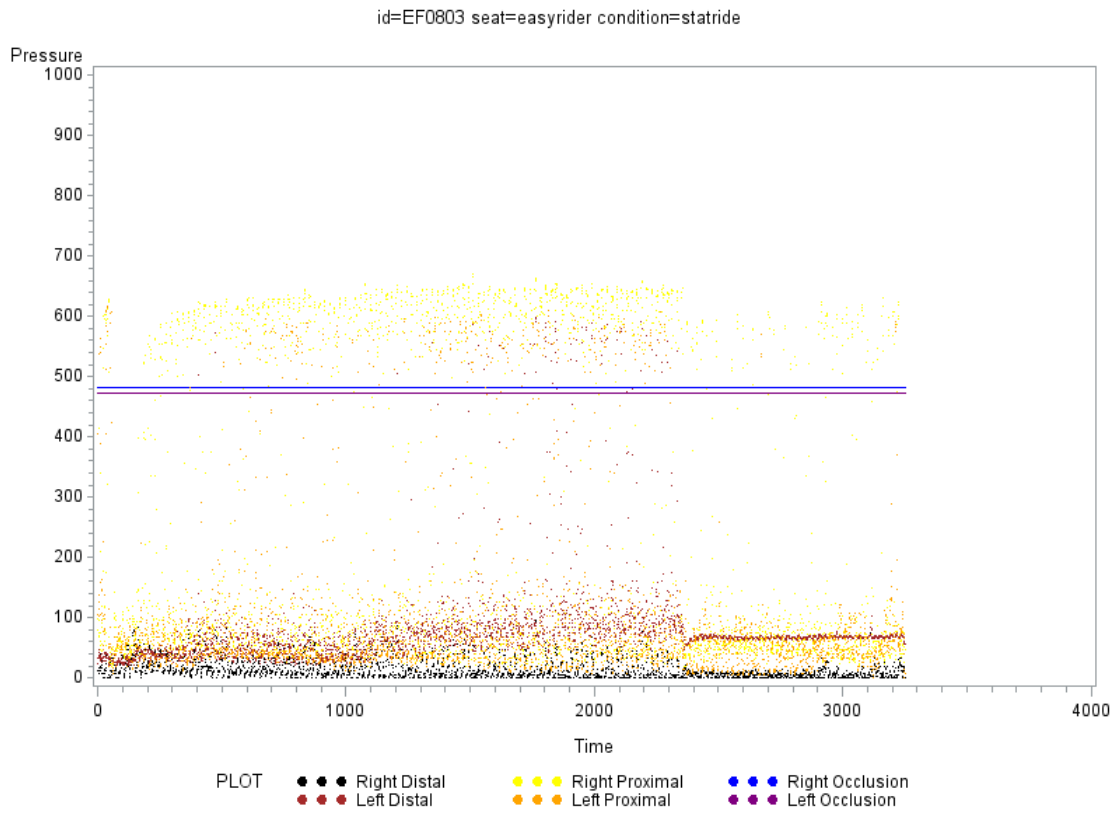

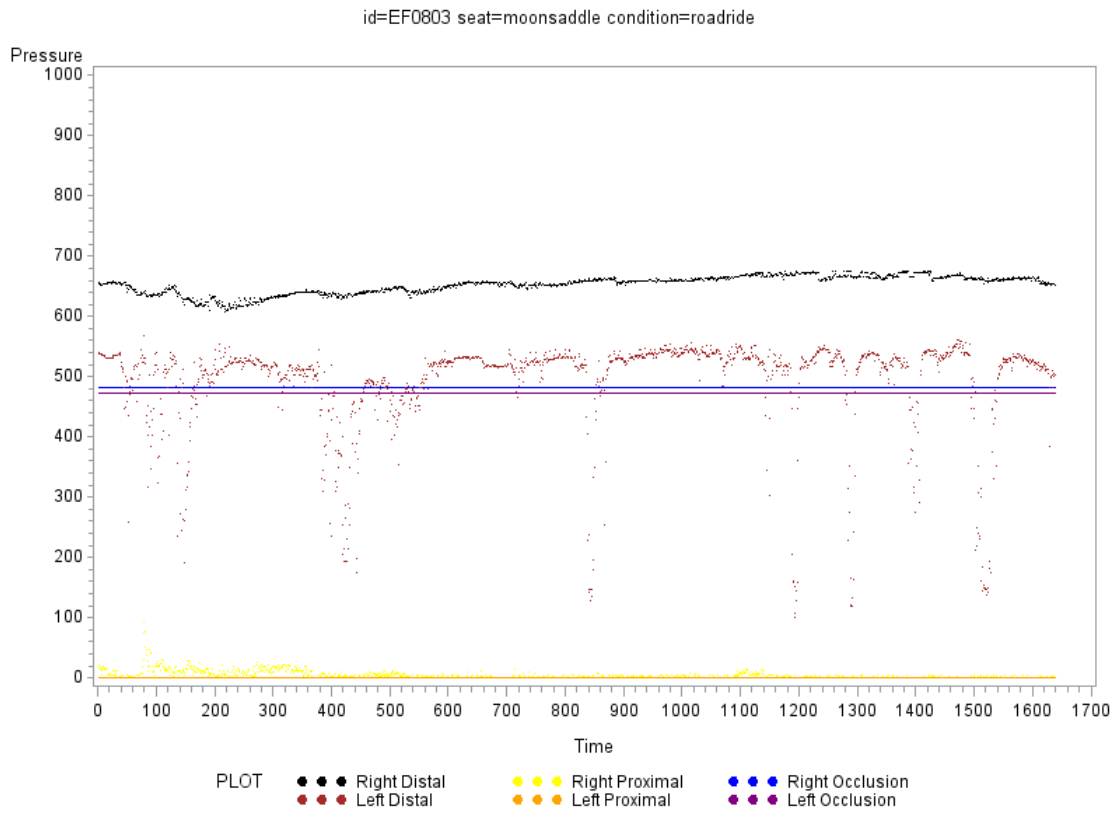

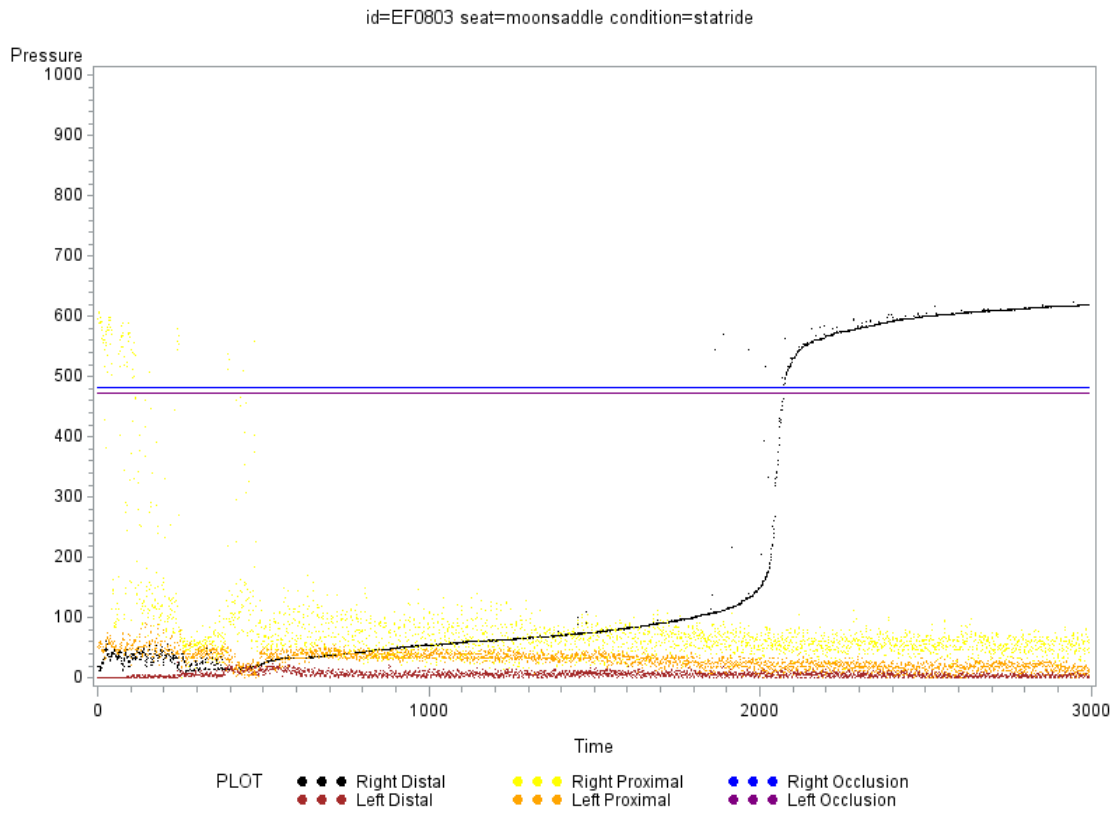

id=EF0803 seat=softtail condition=roadride

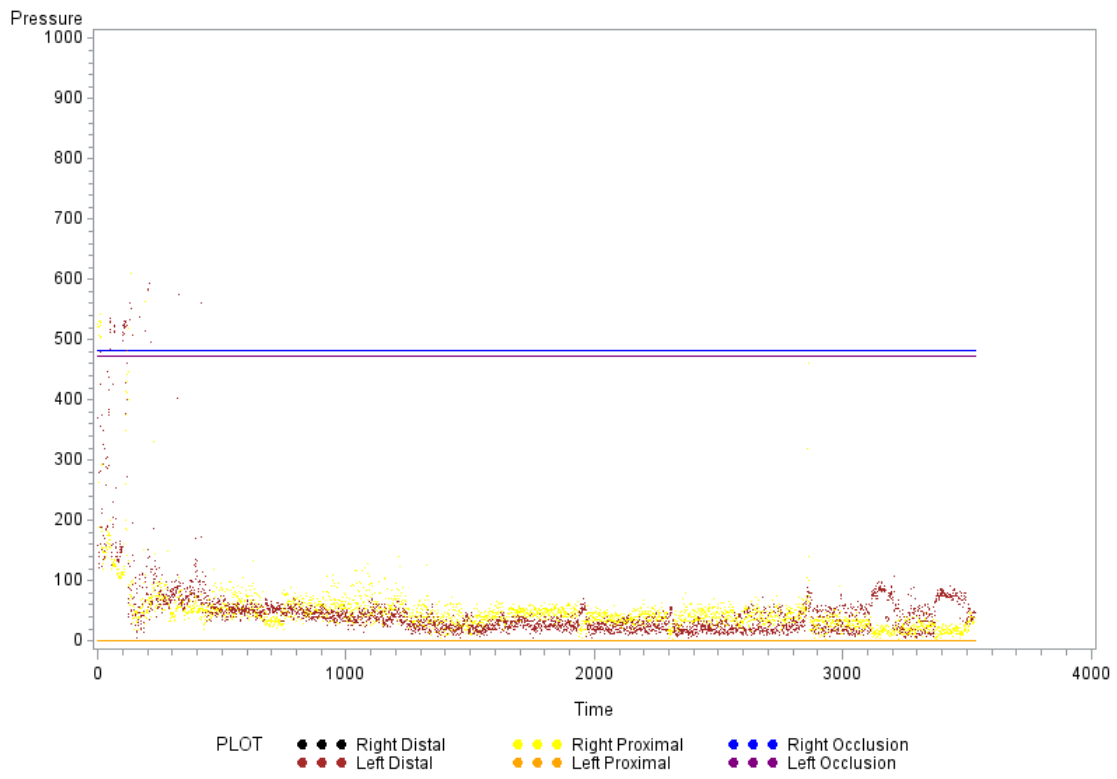

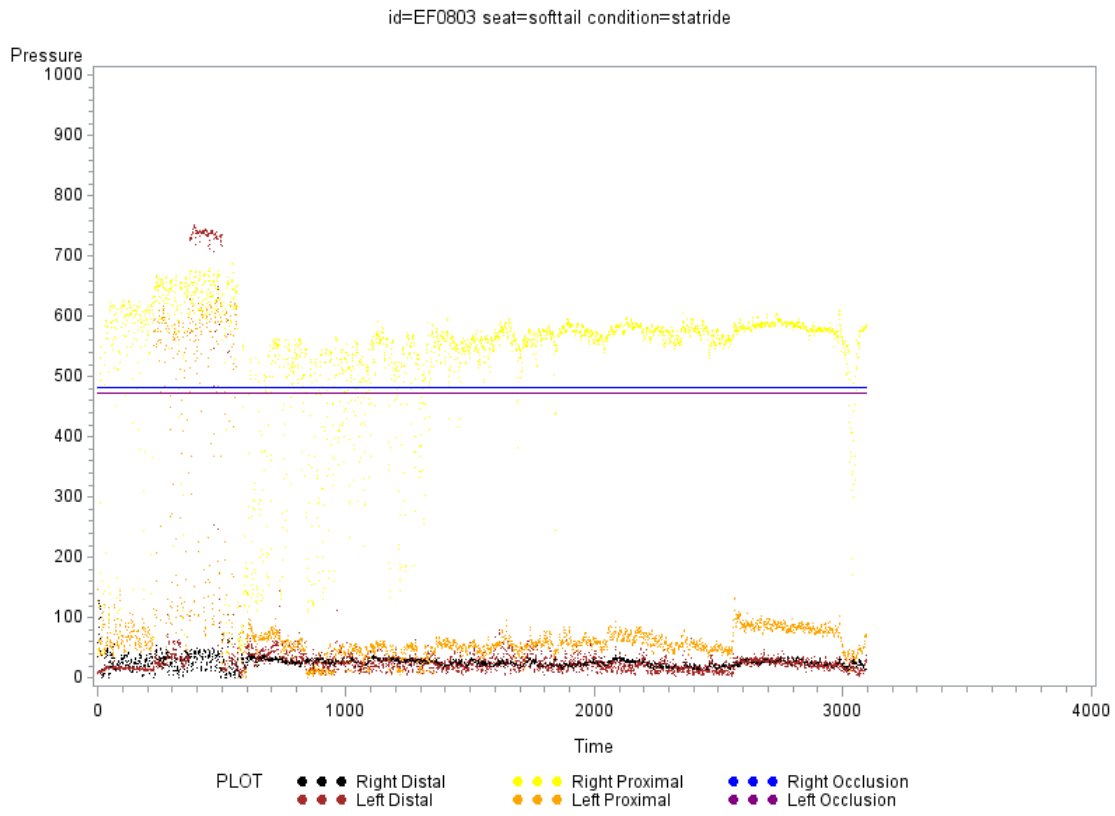

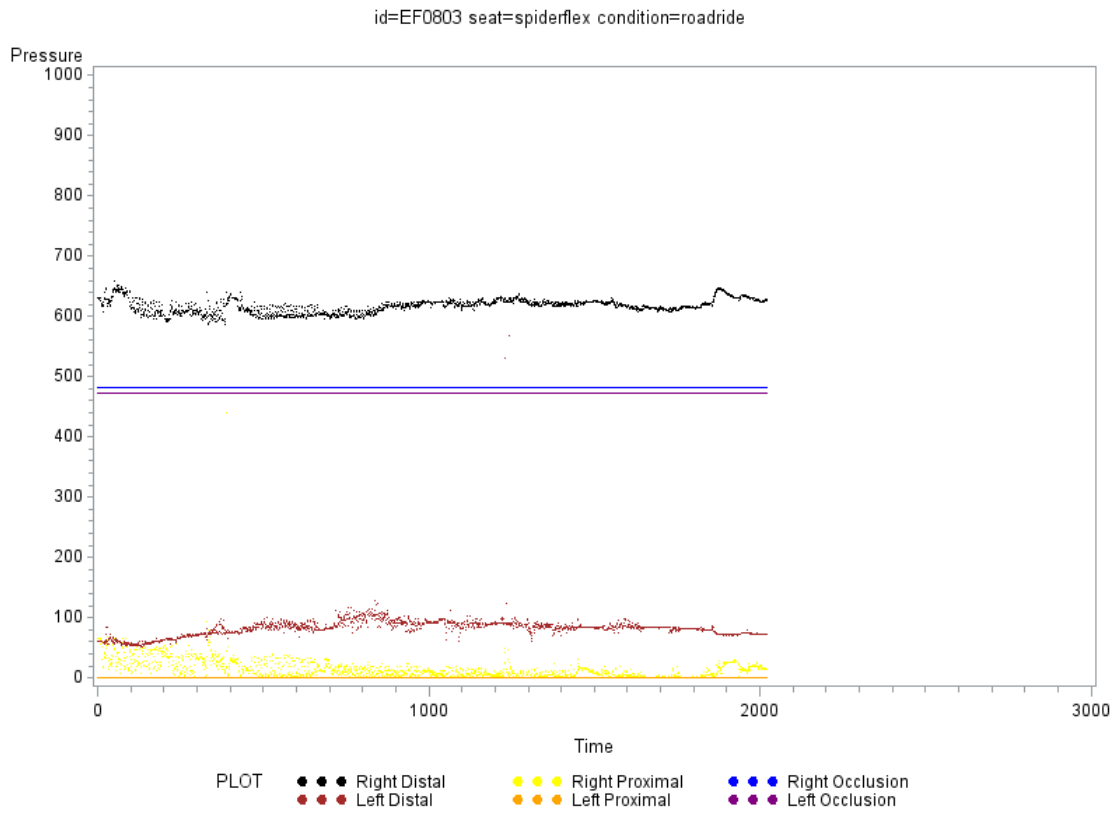

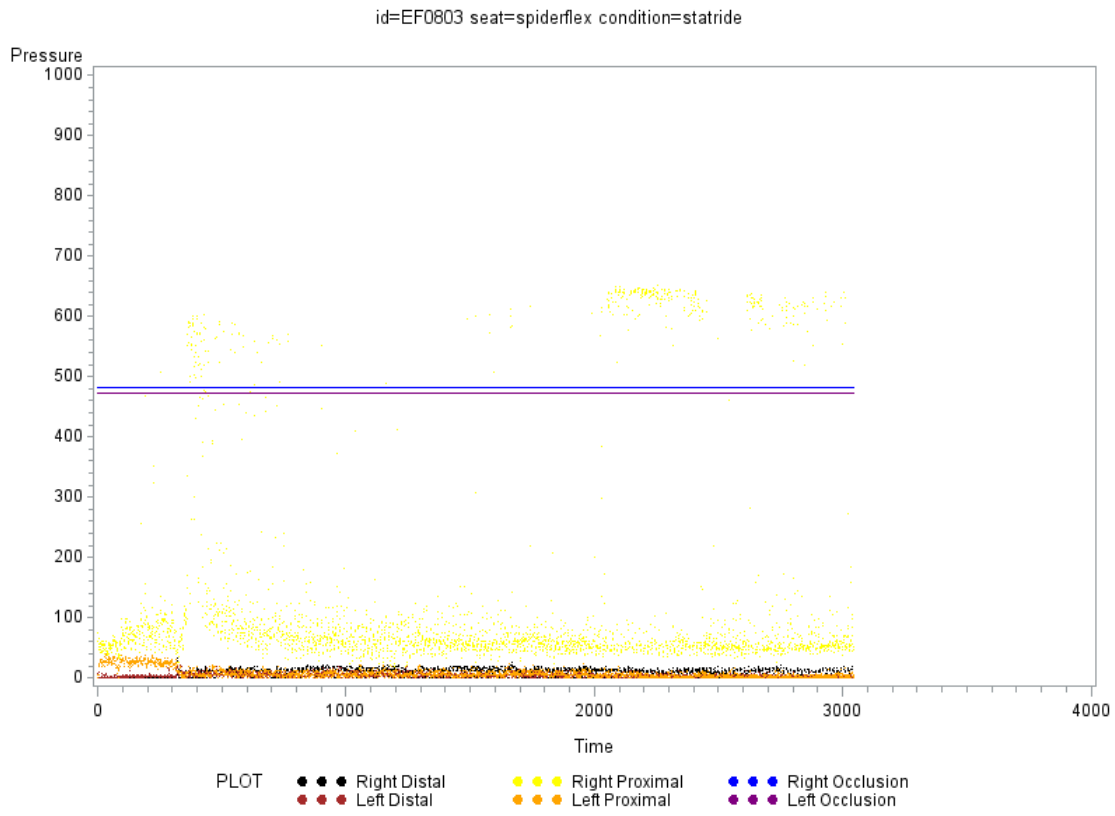



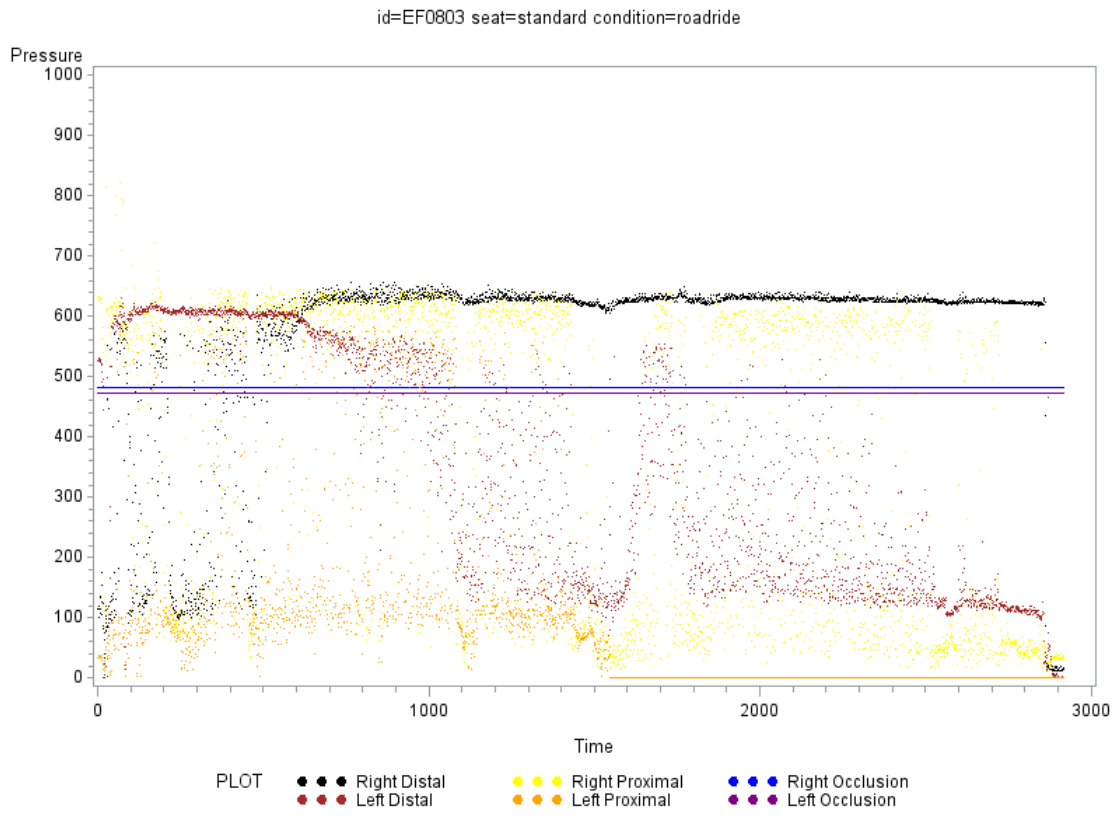

id=EF0803 seat=standard condition=statride

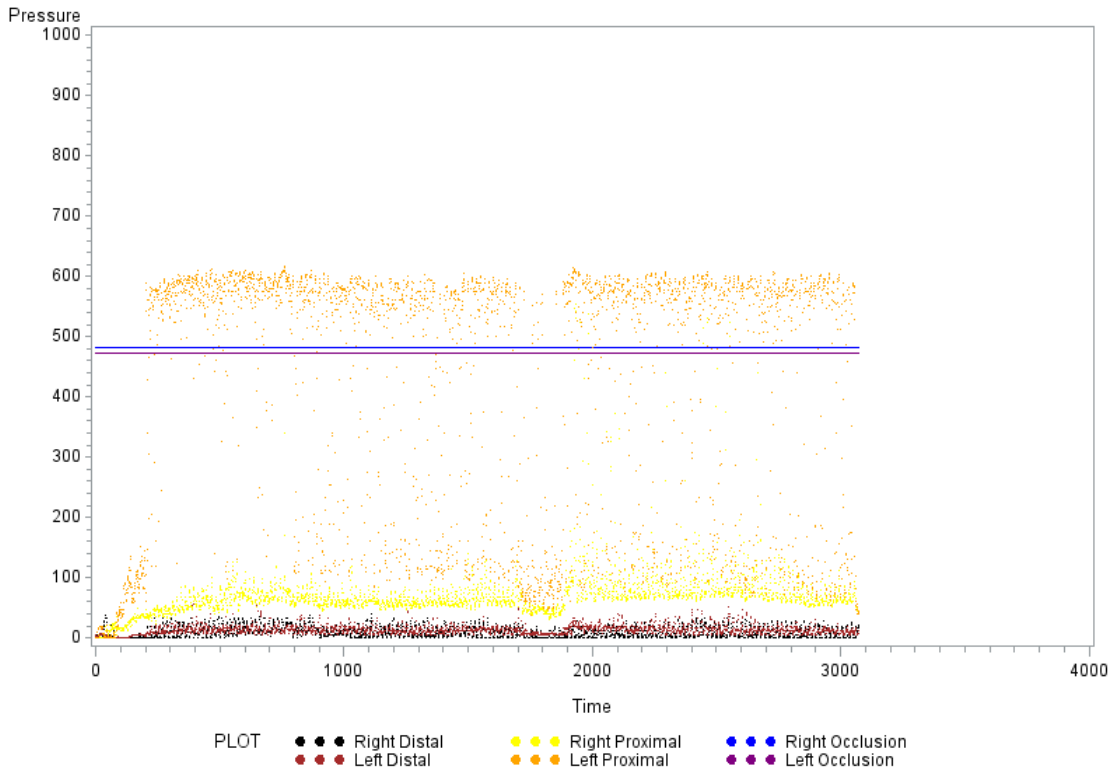

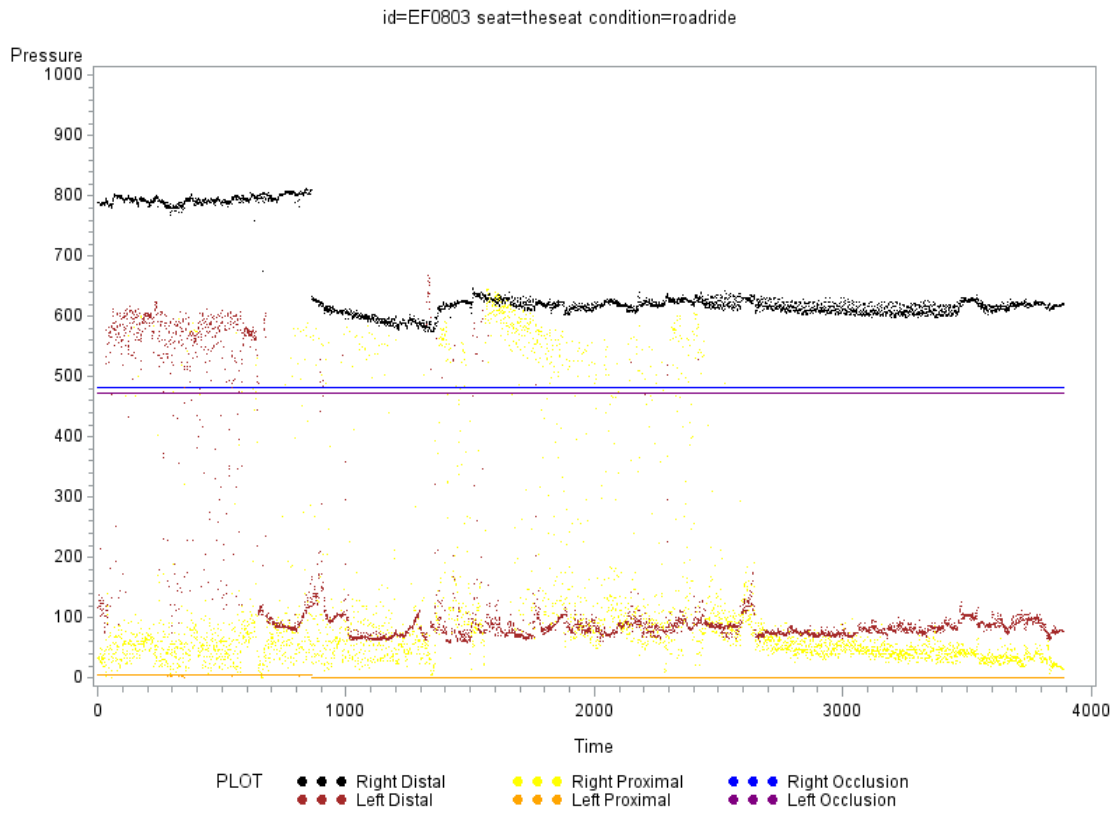

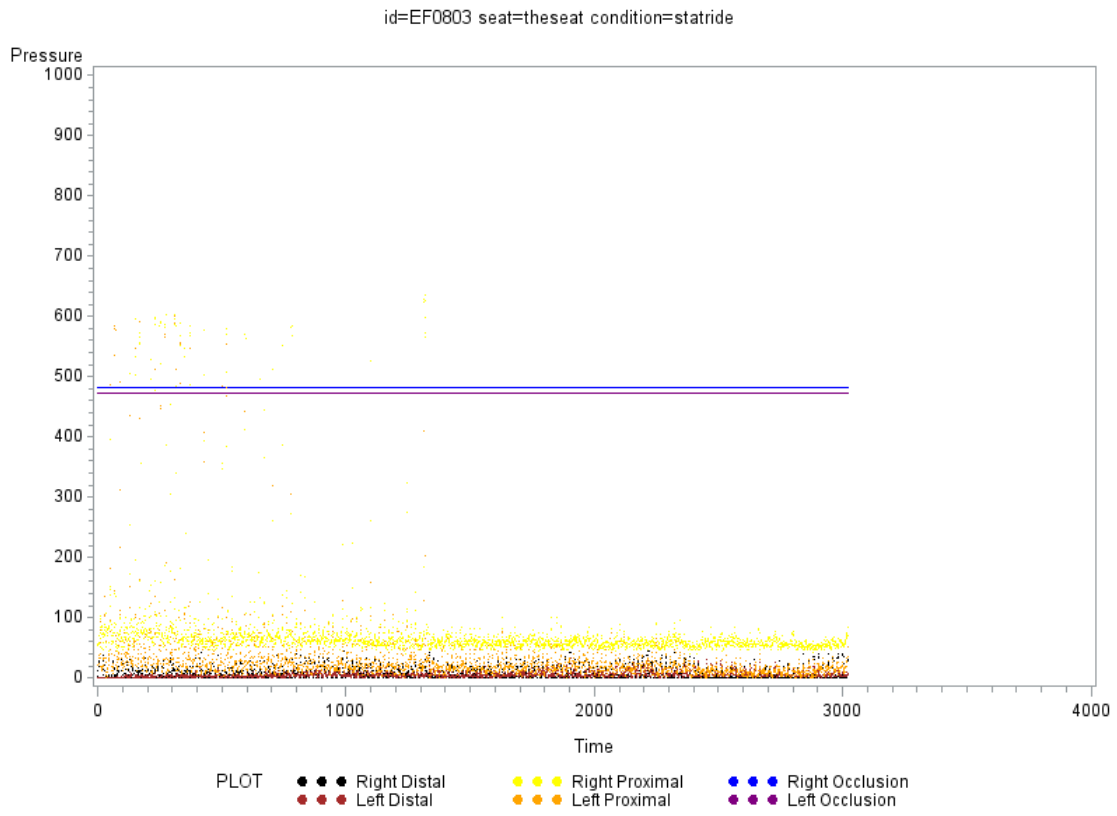

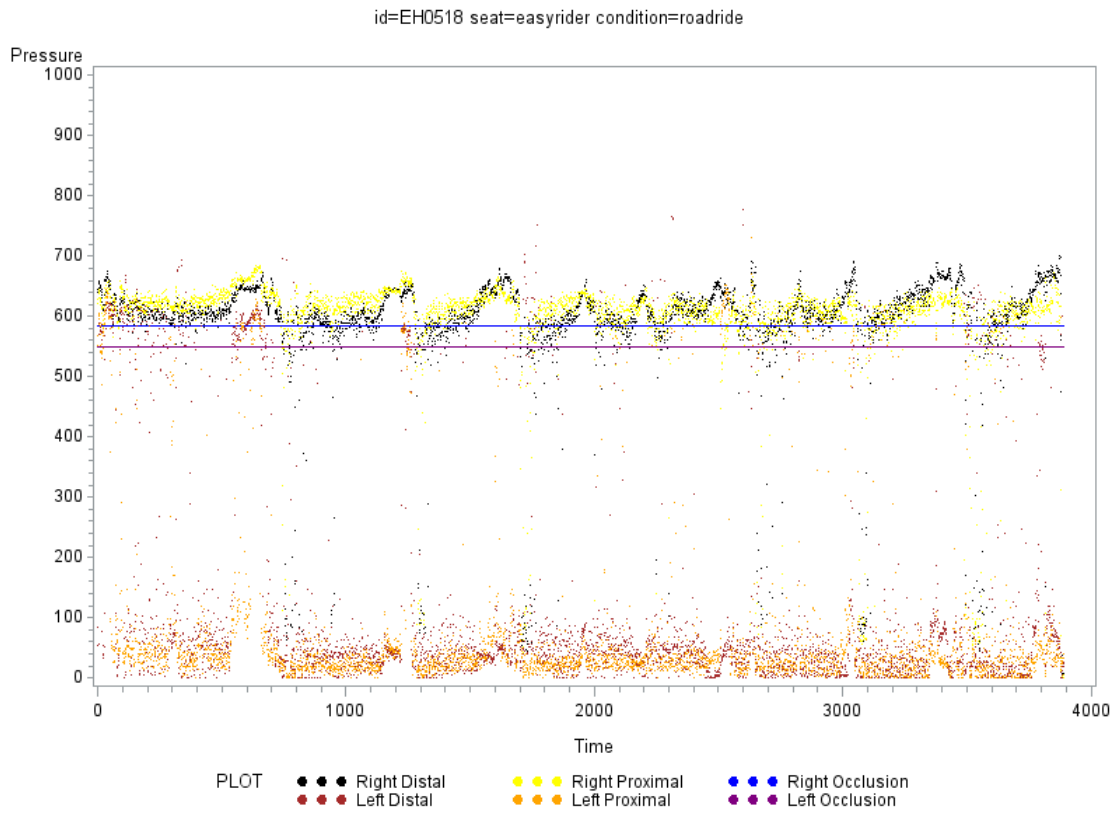

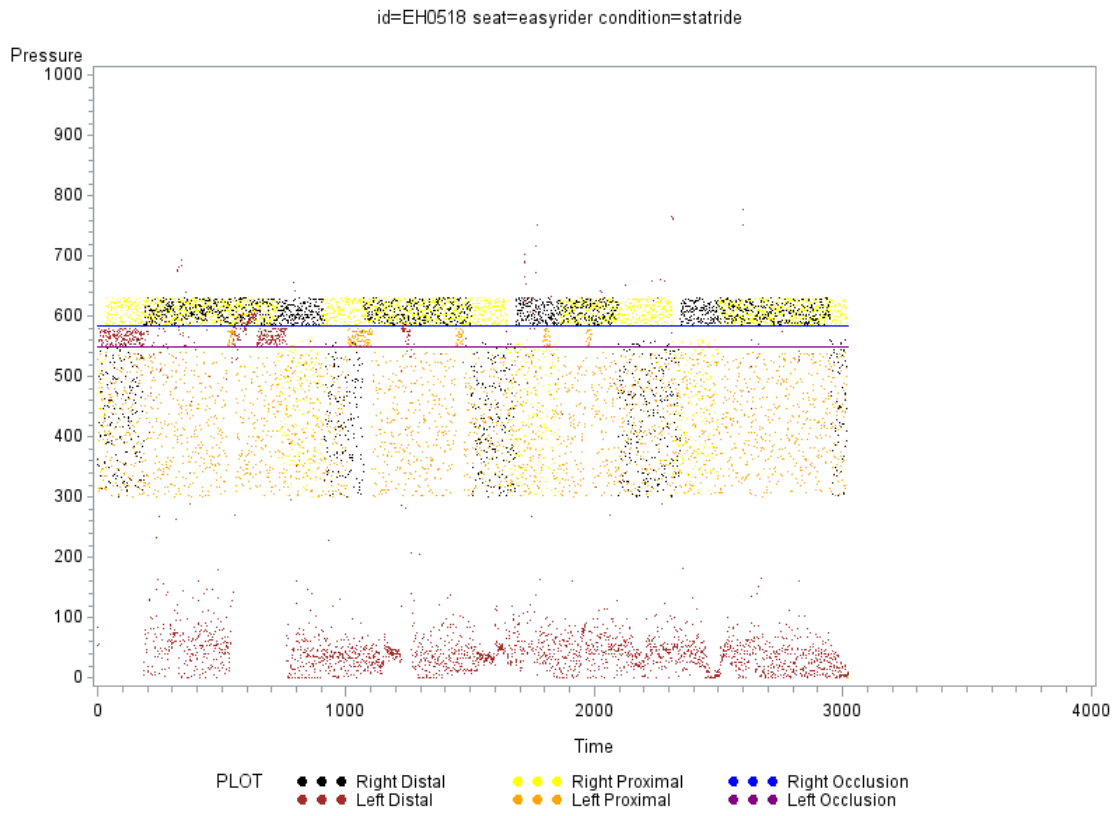

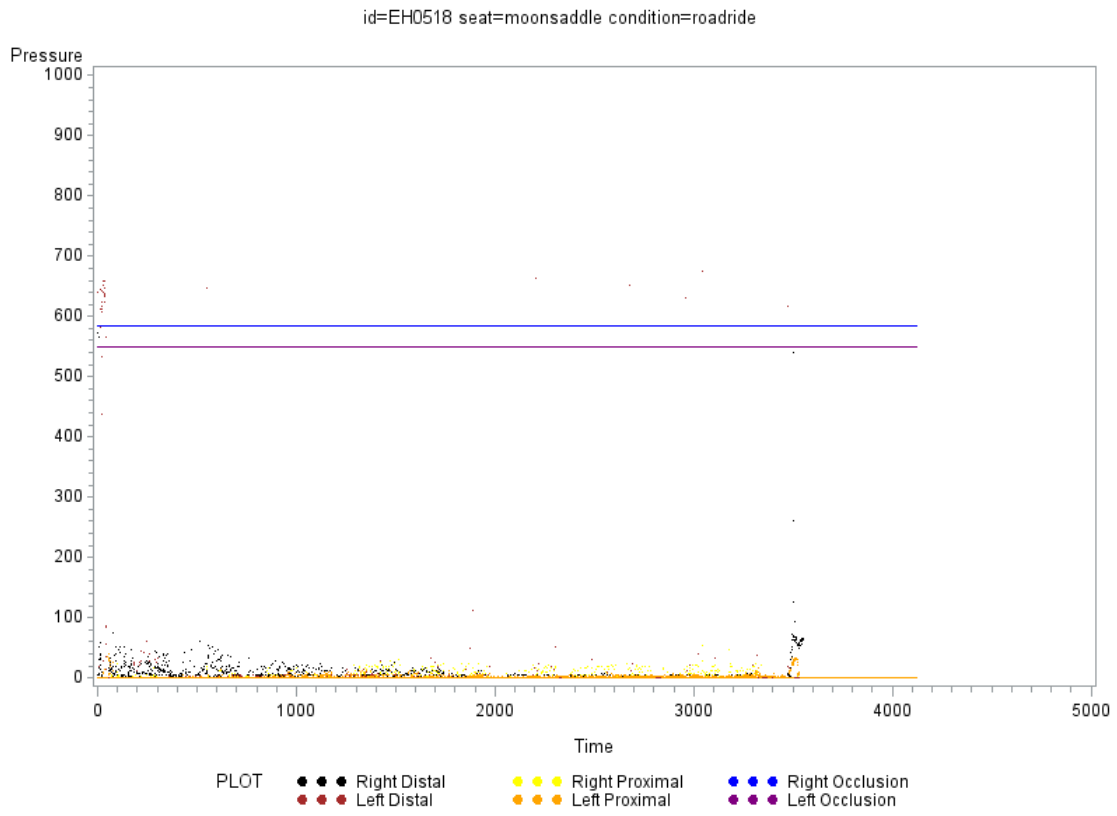

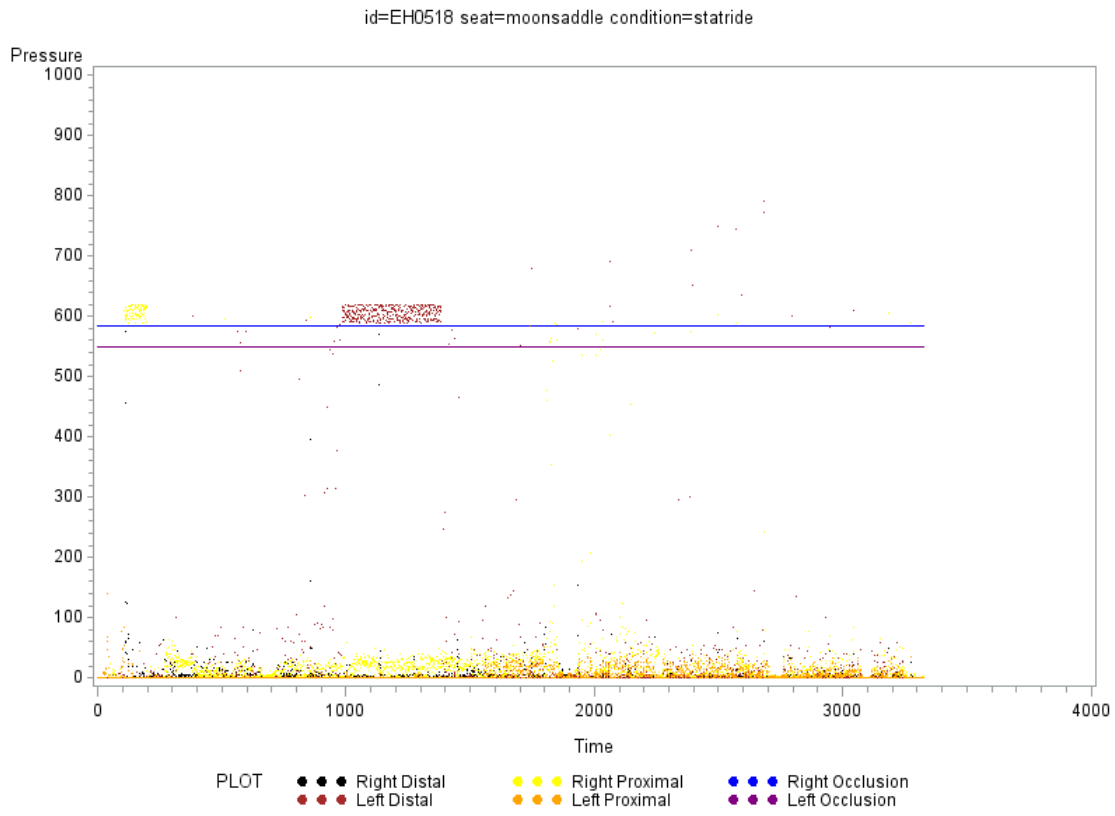



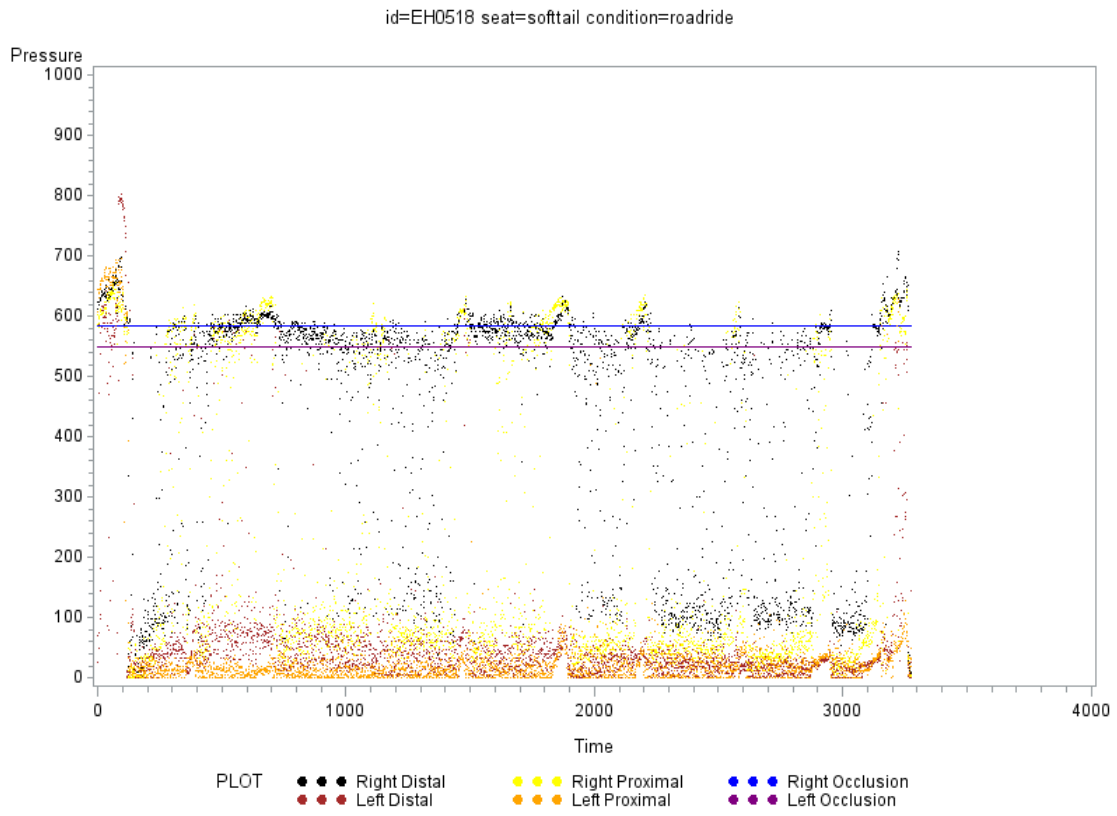

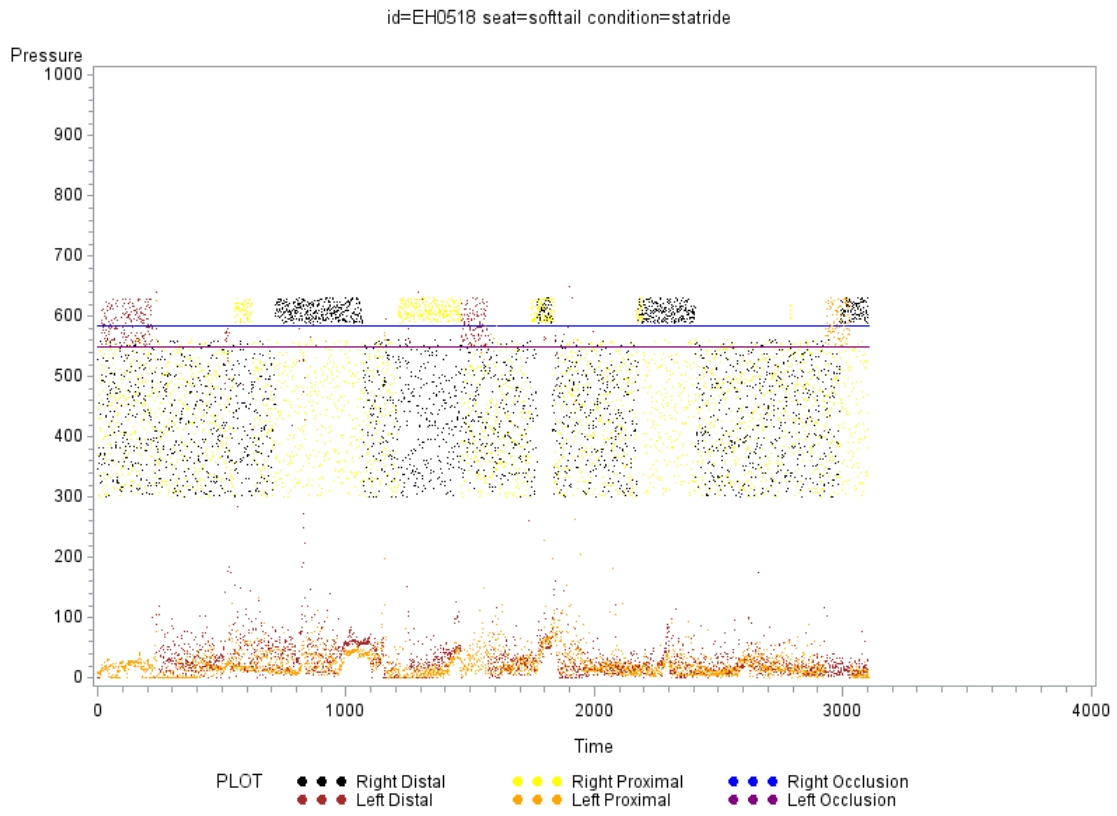

id=EH0518 seat=spiderflex condition=roadride

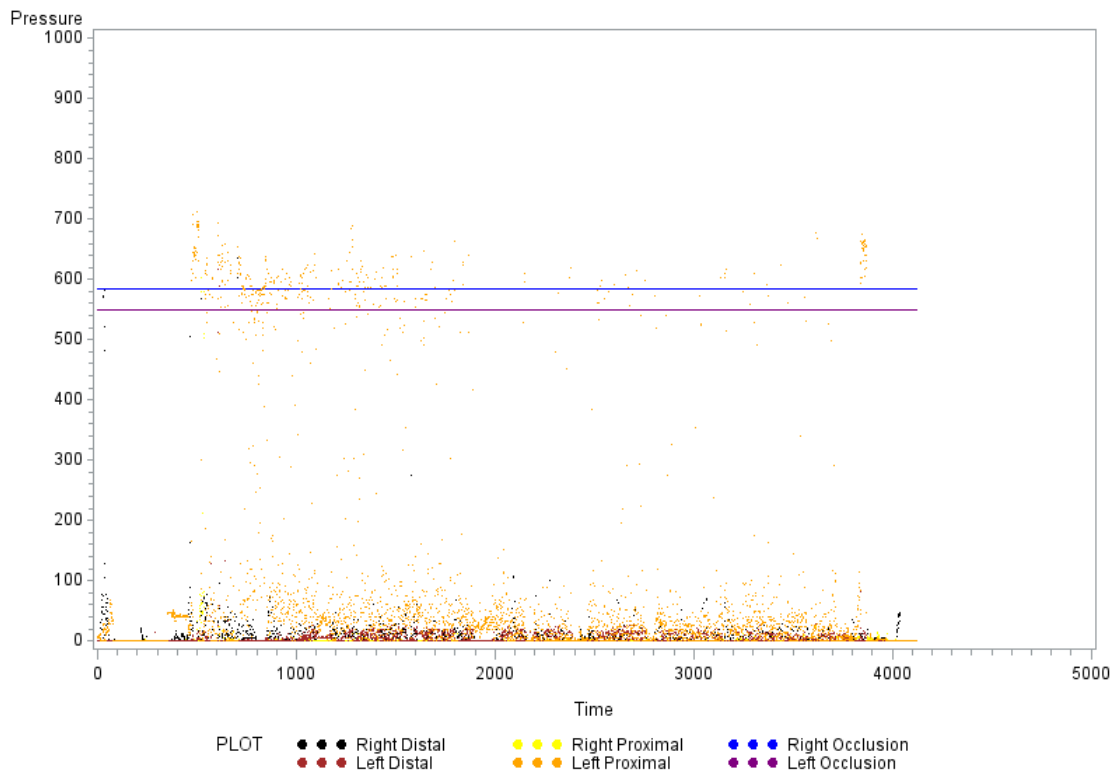

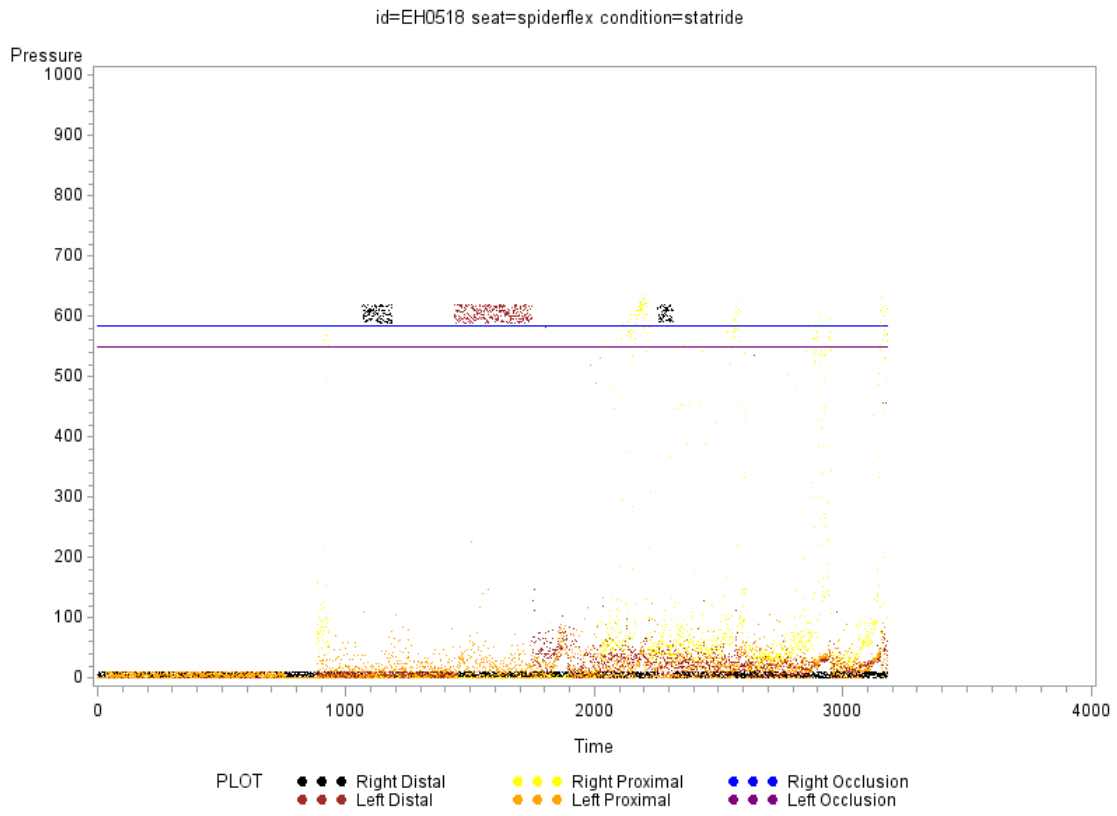

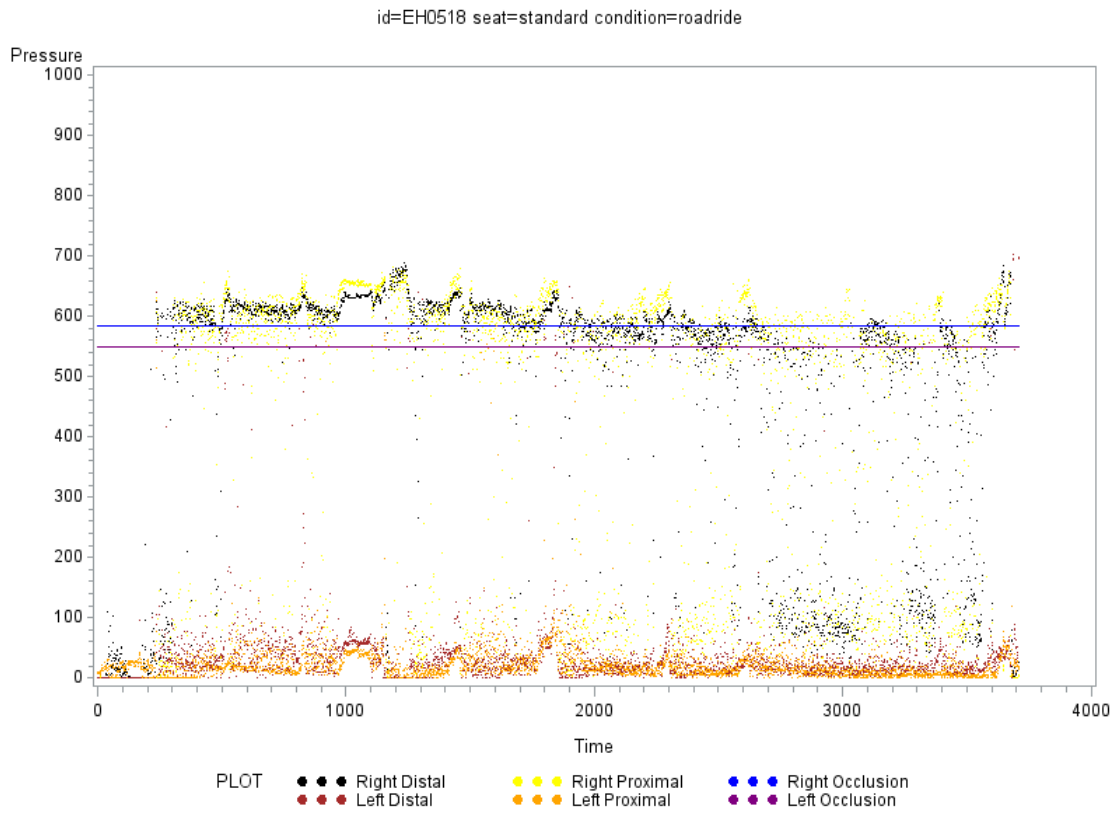

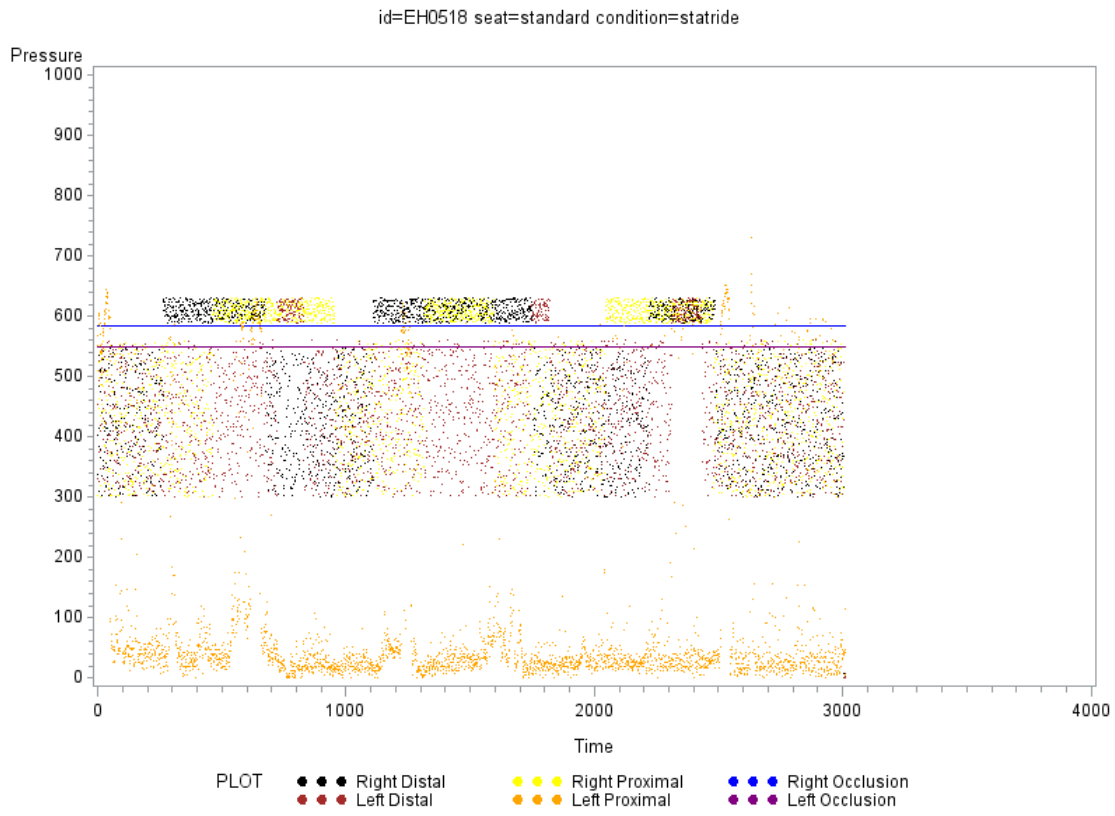

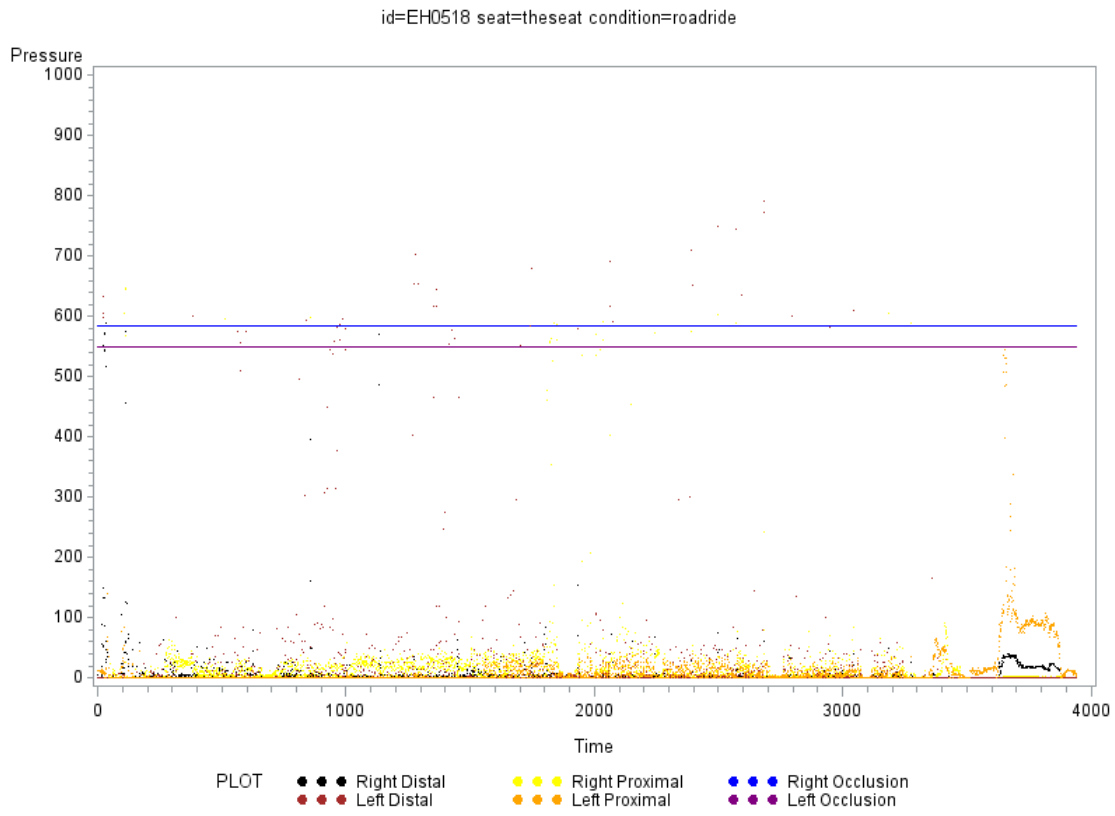

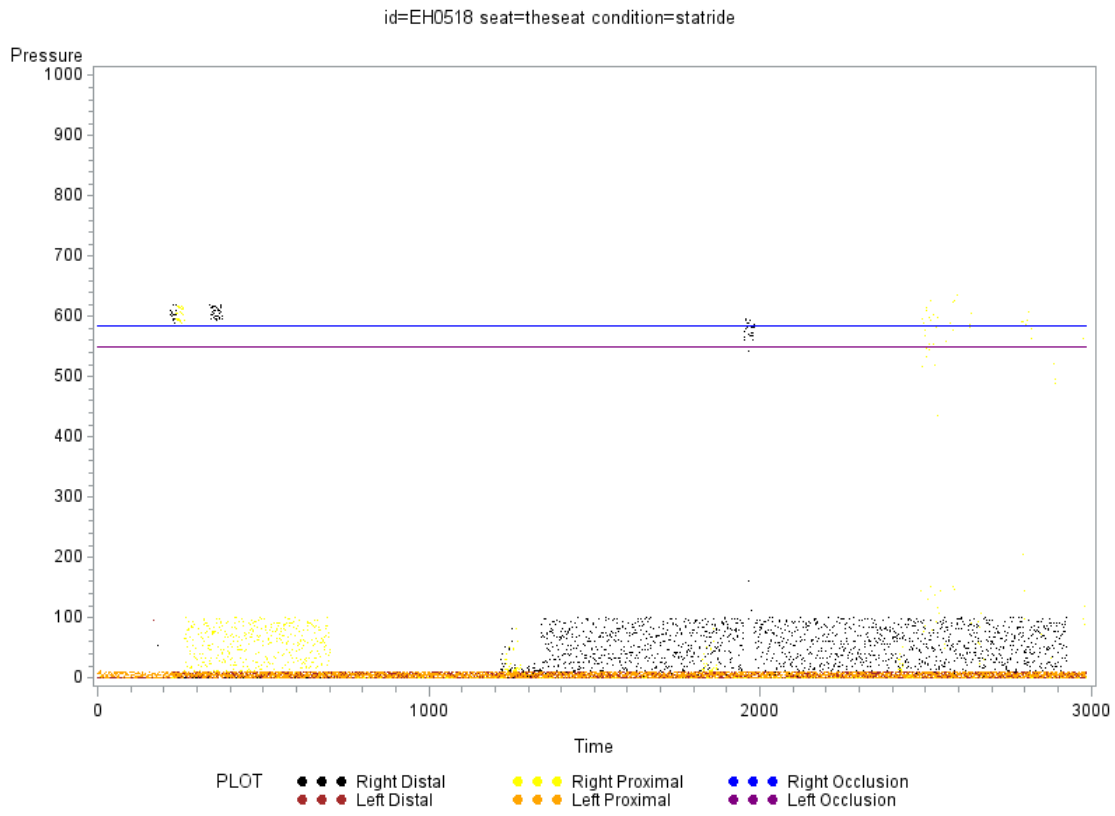



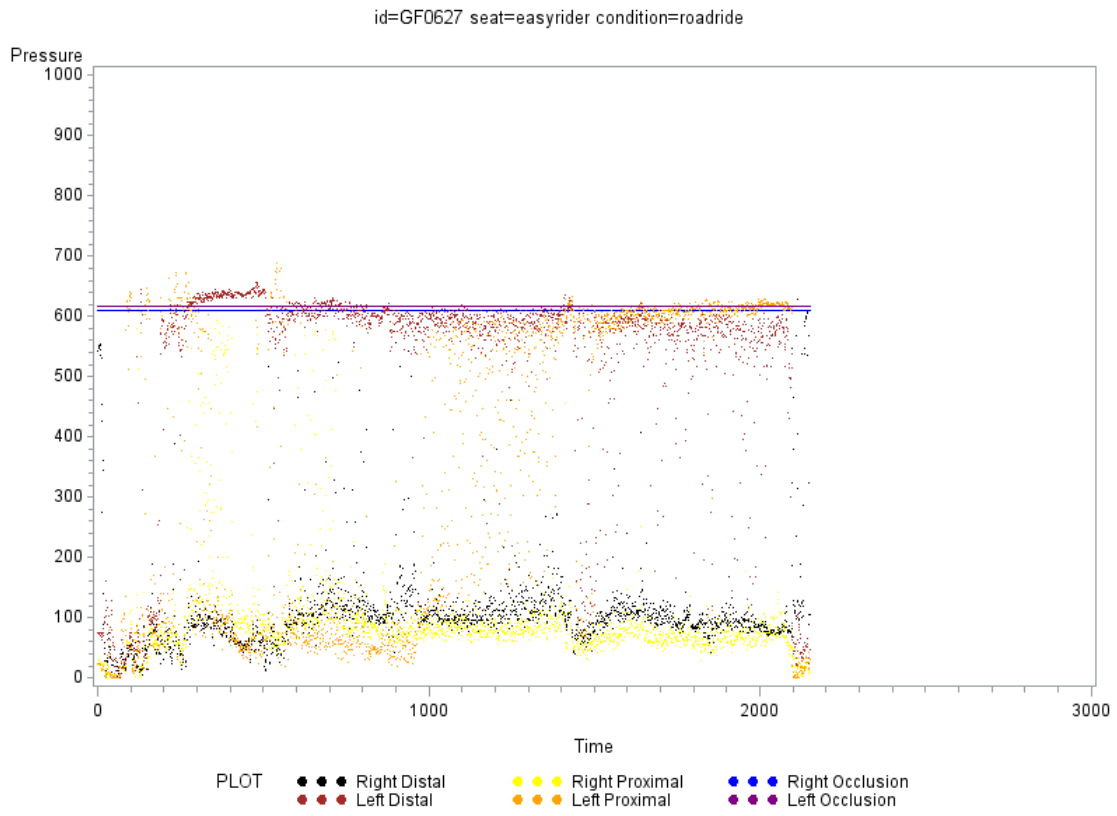

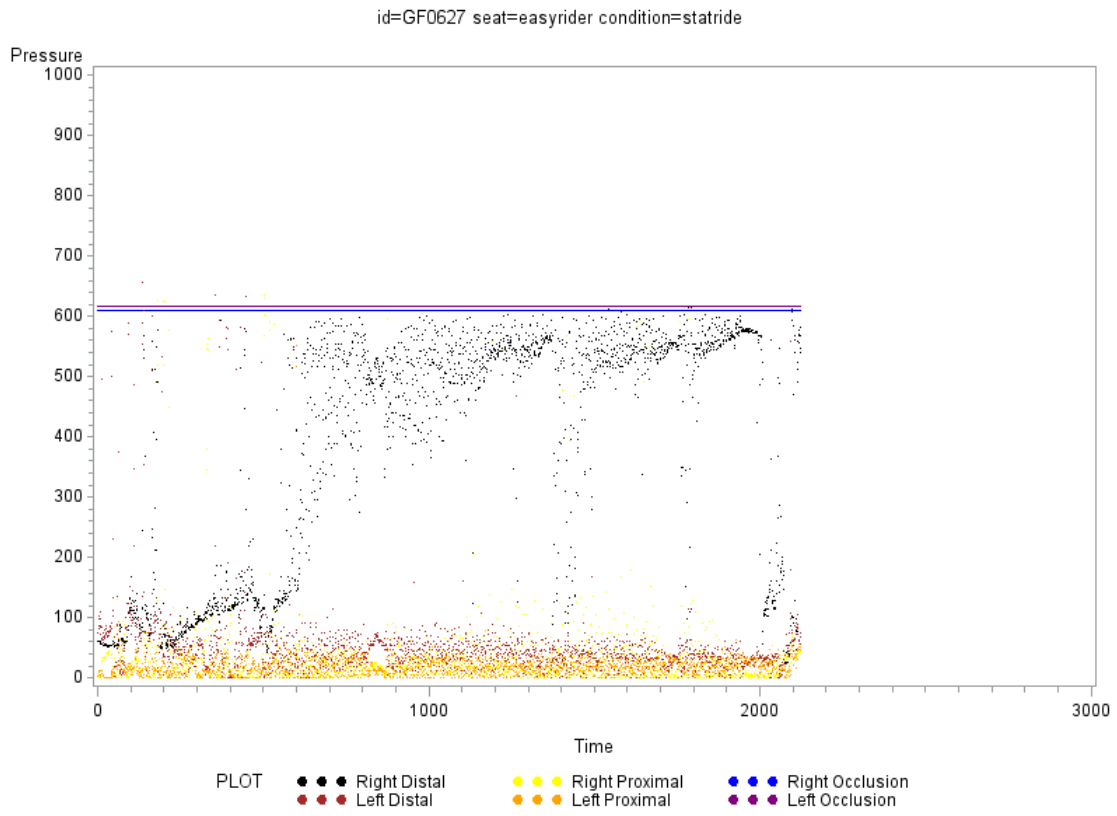

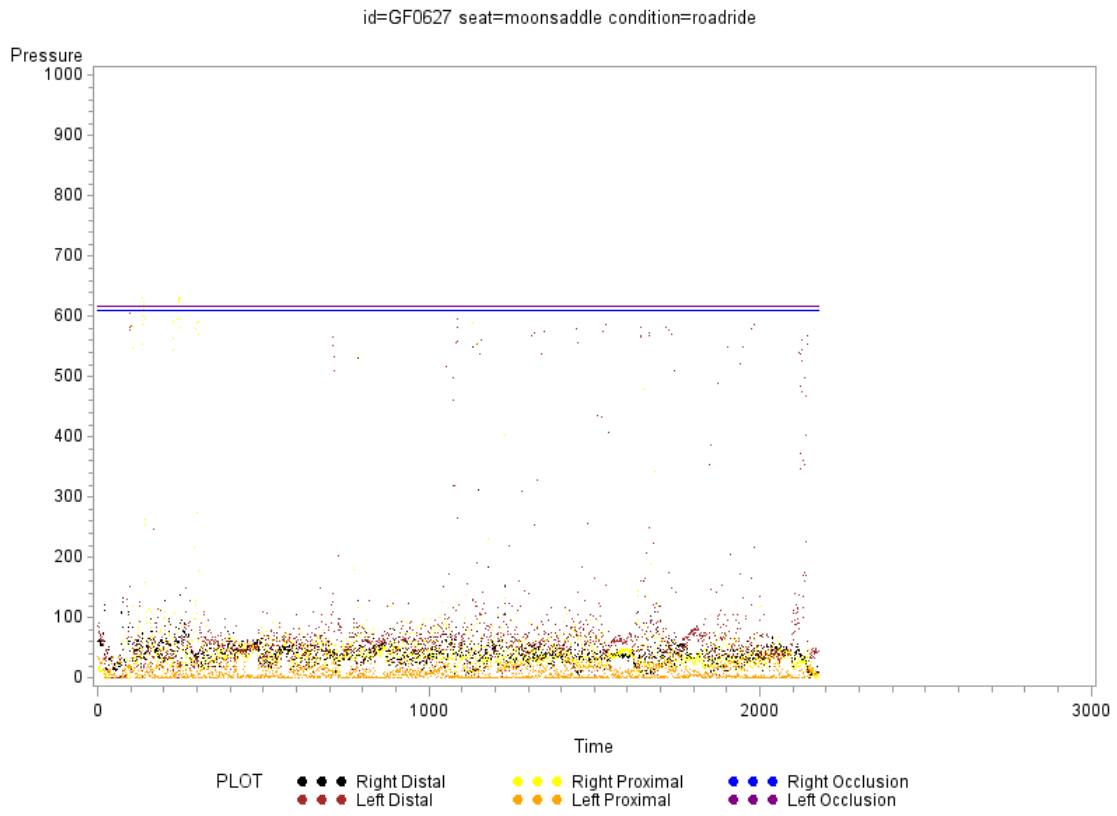

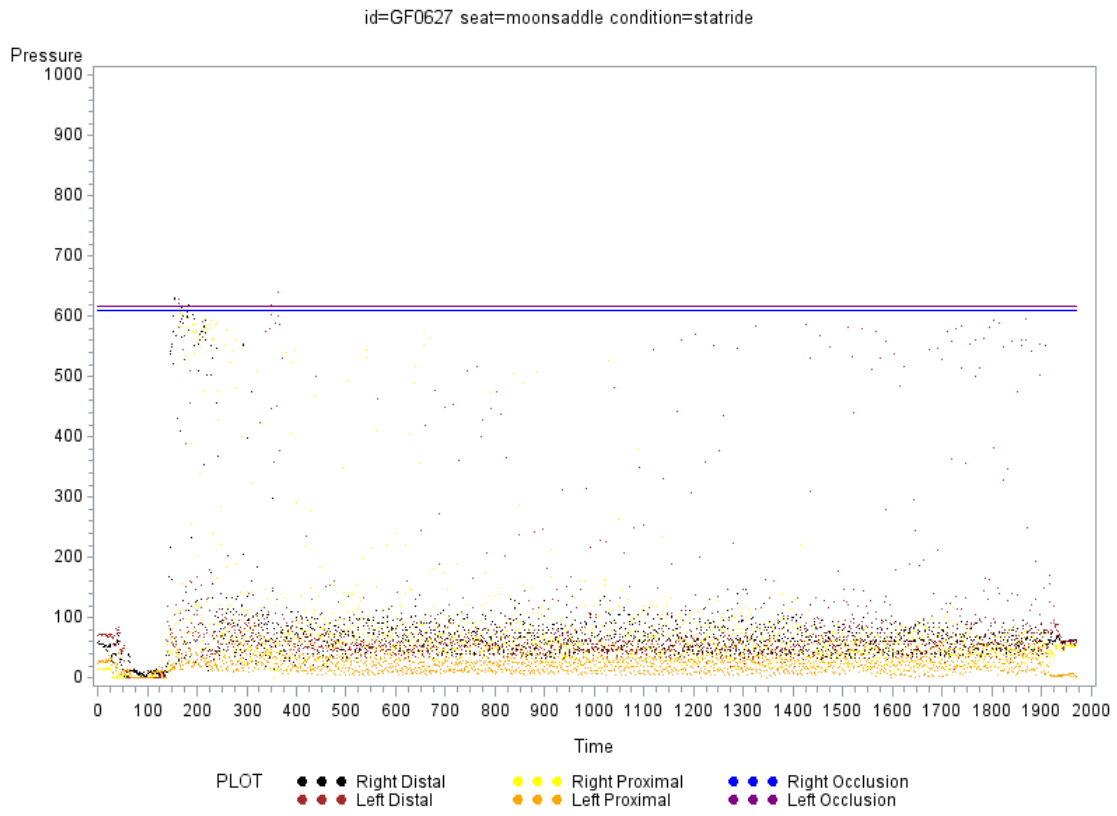

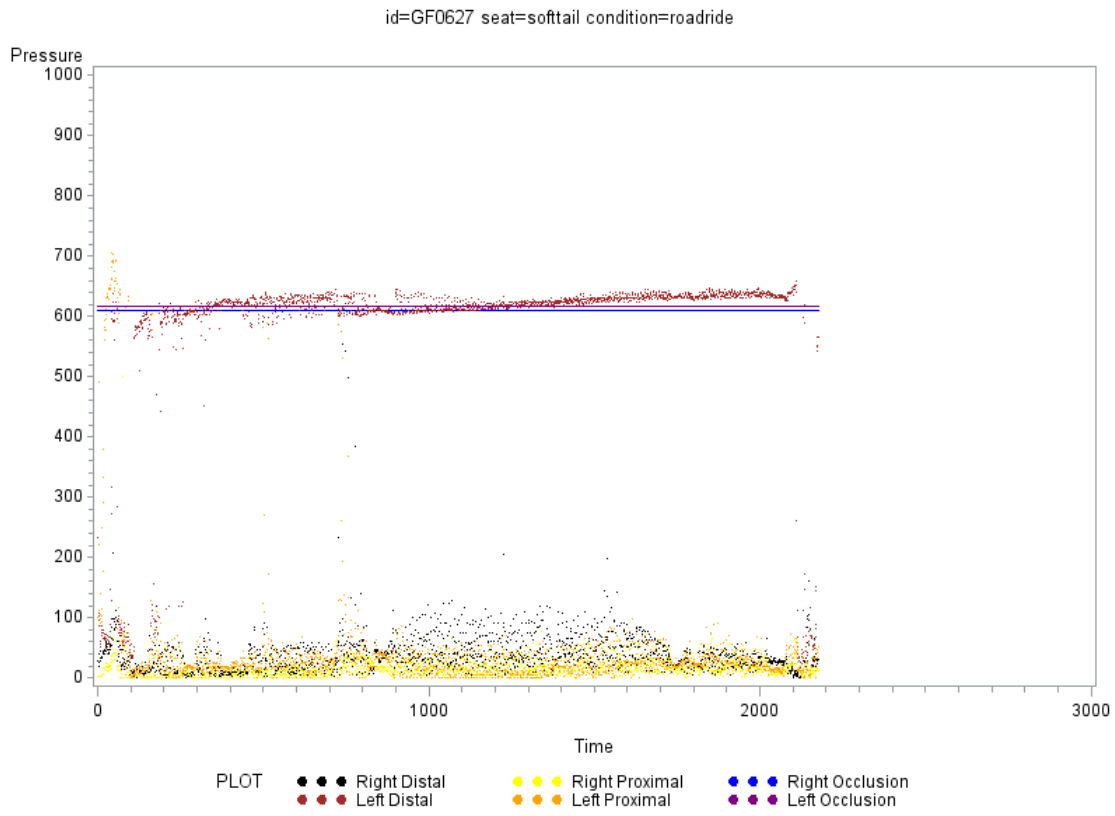

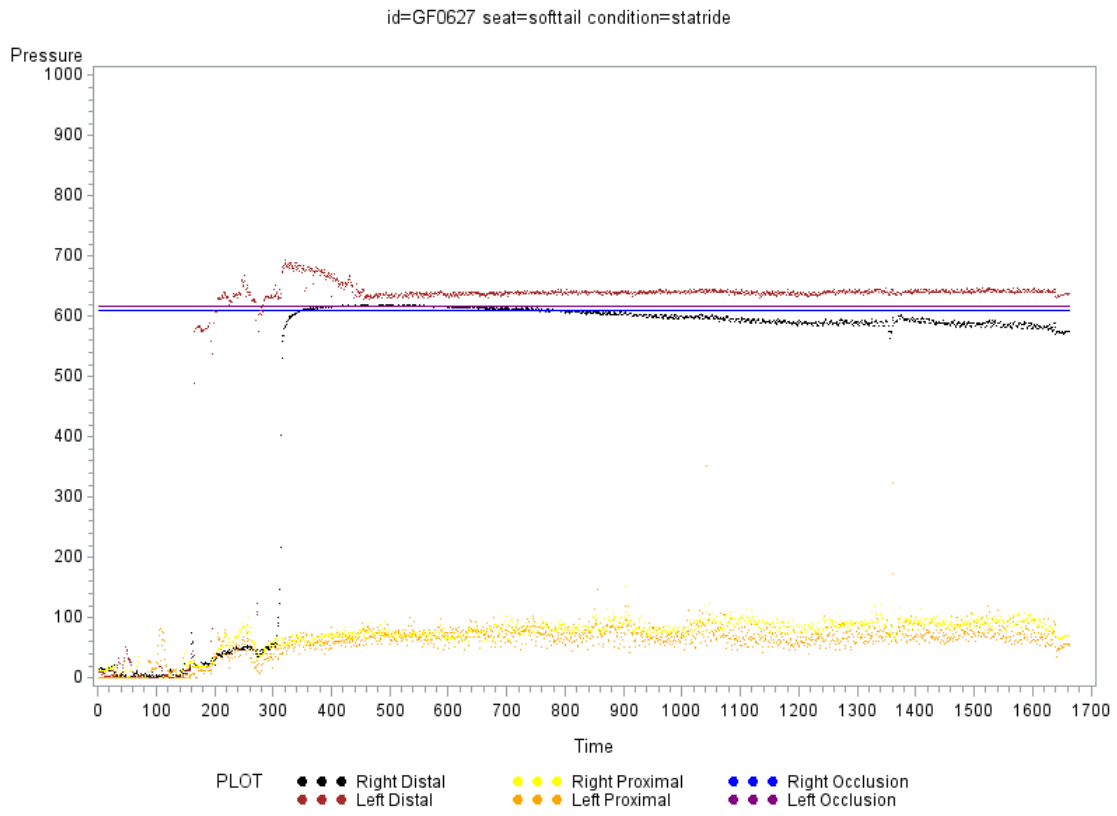

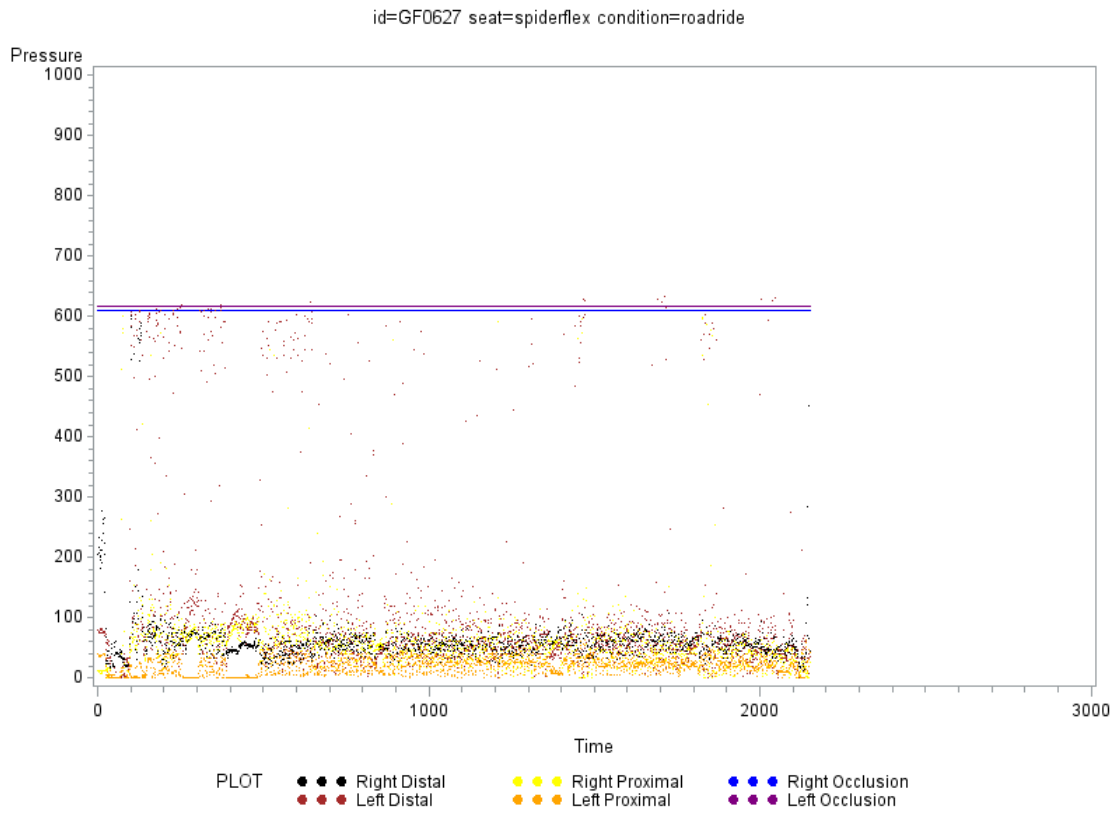

id=GF0627 seat=spiderflex condition=statride

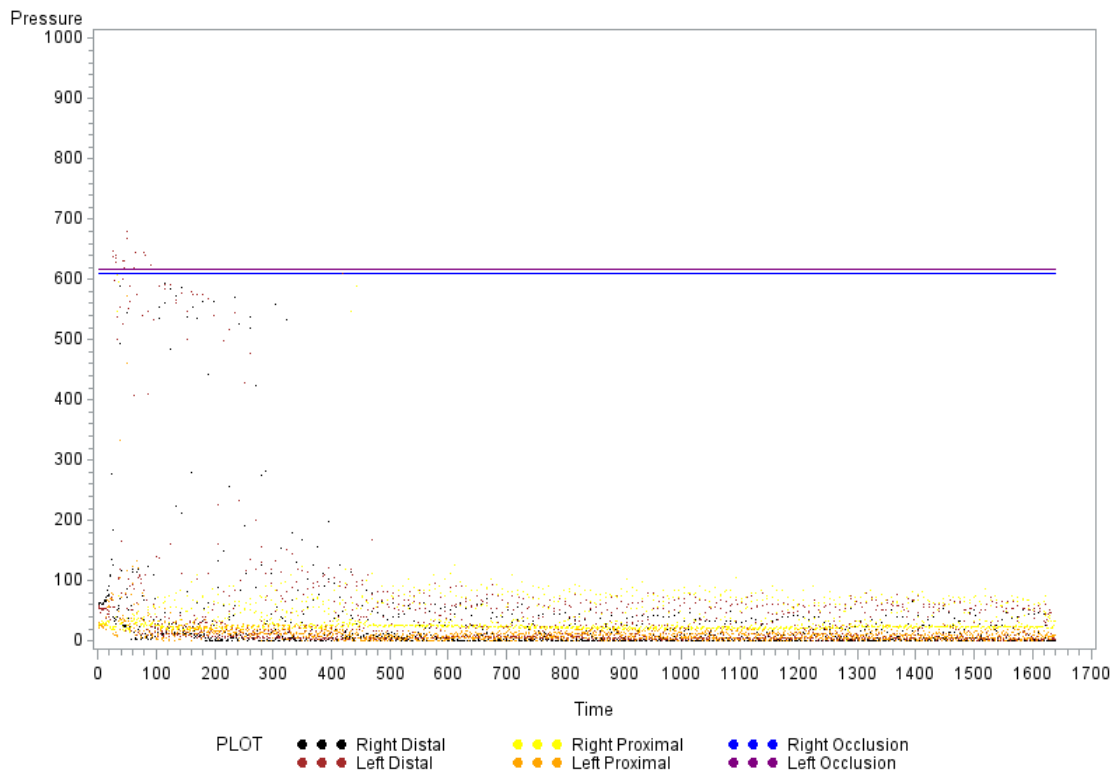



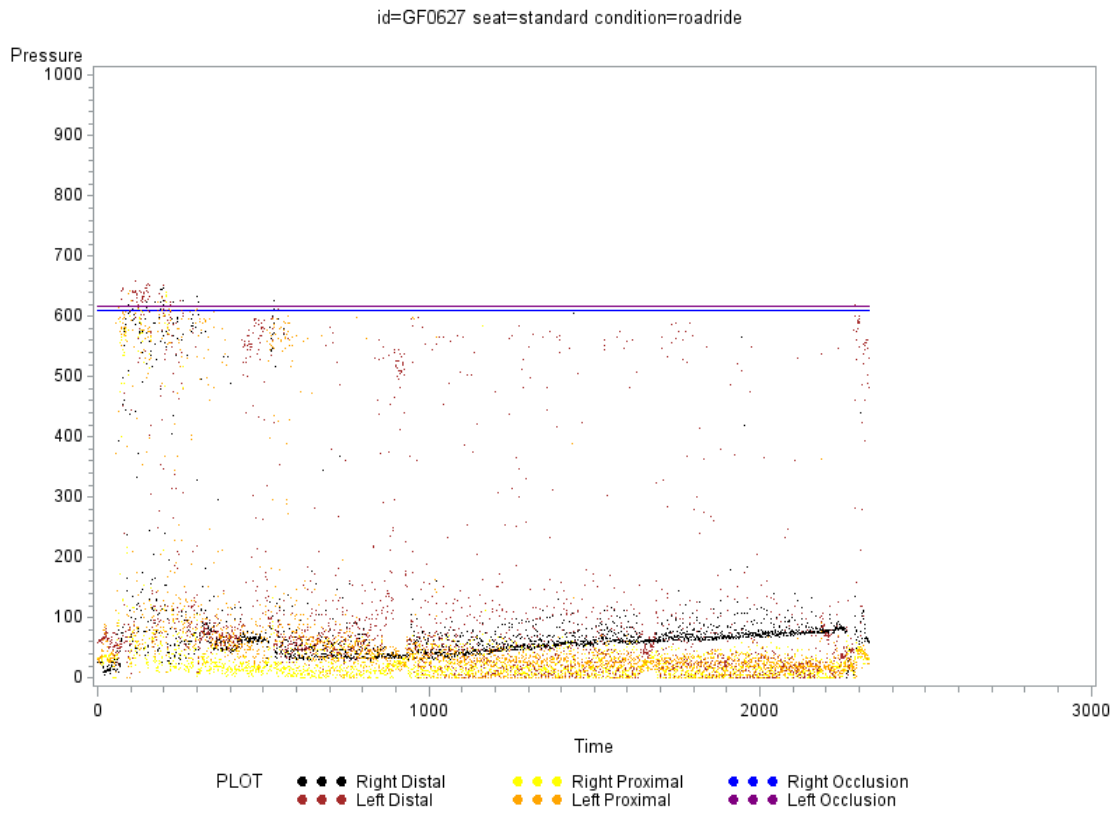

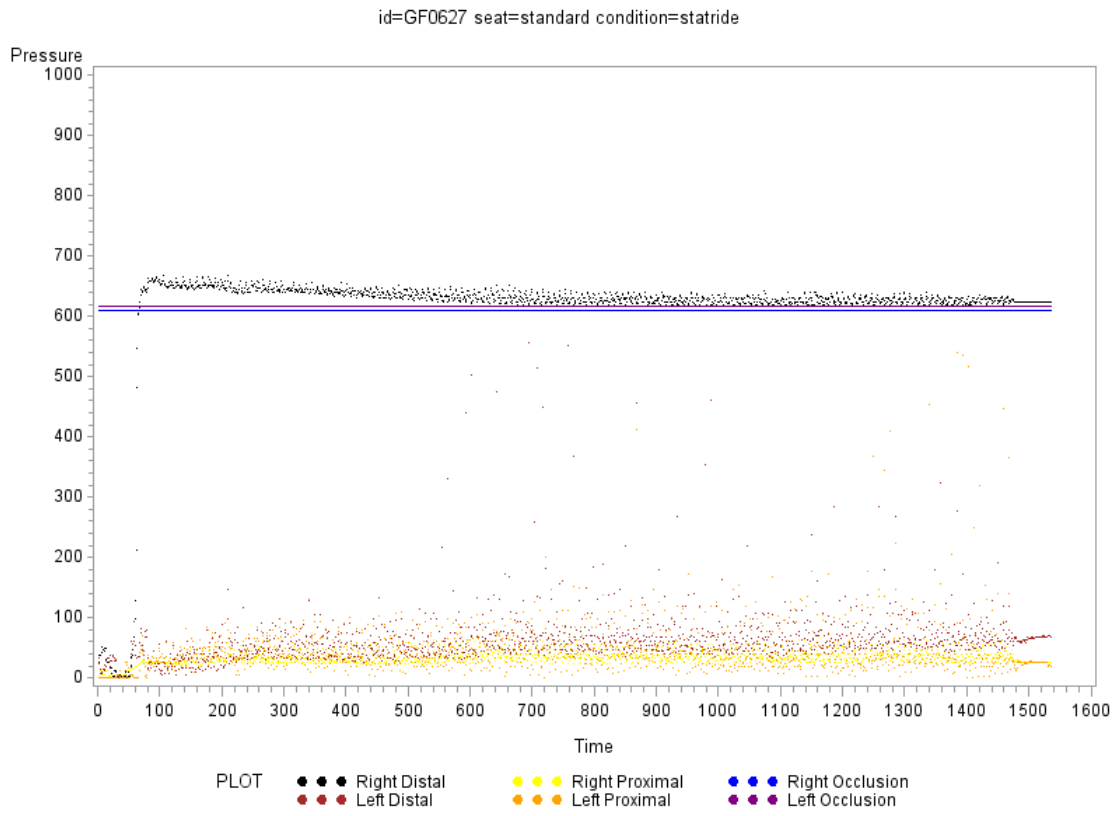

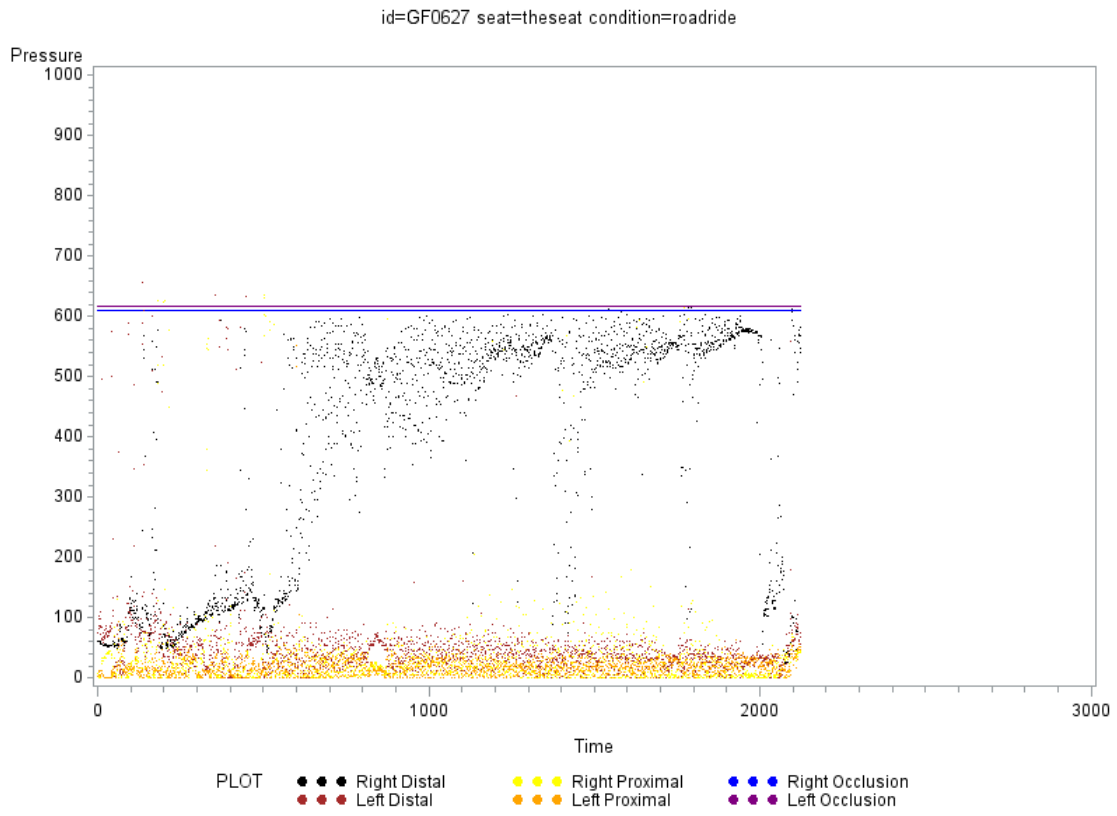

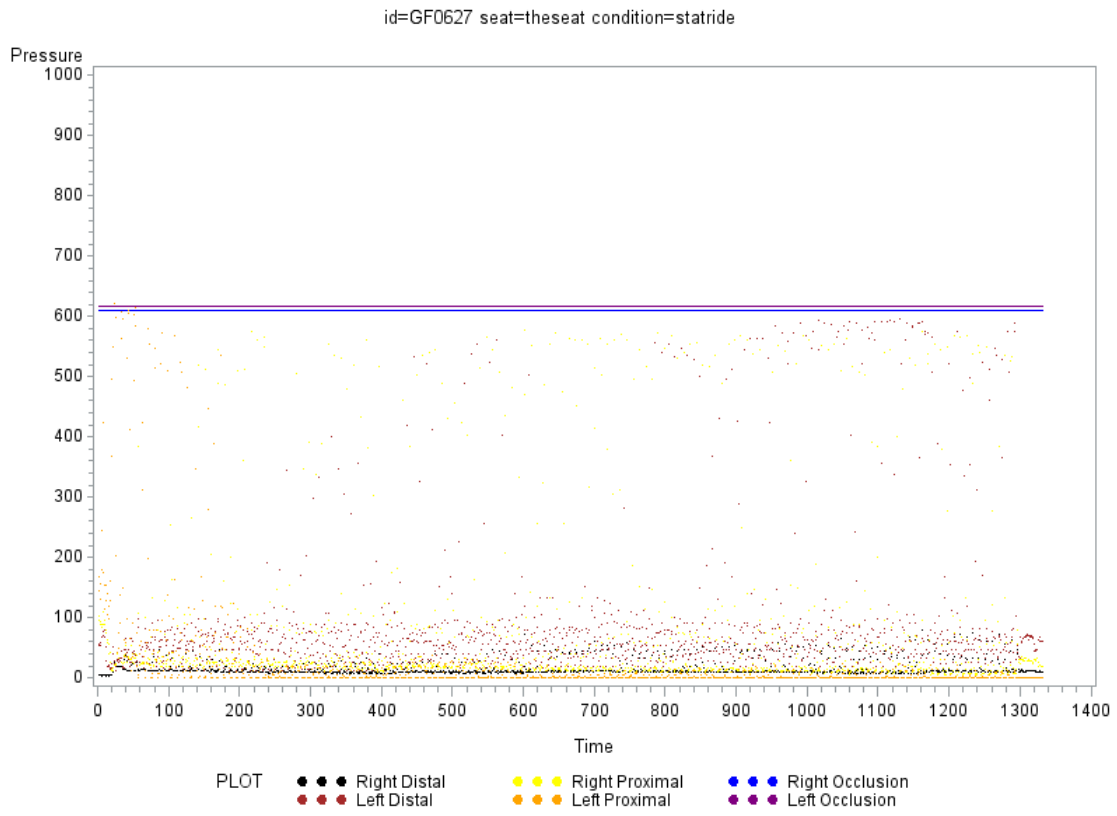

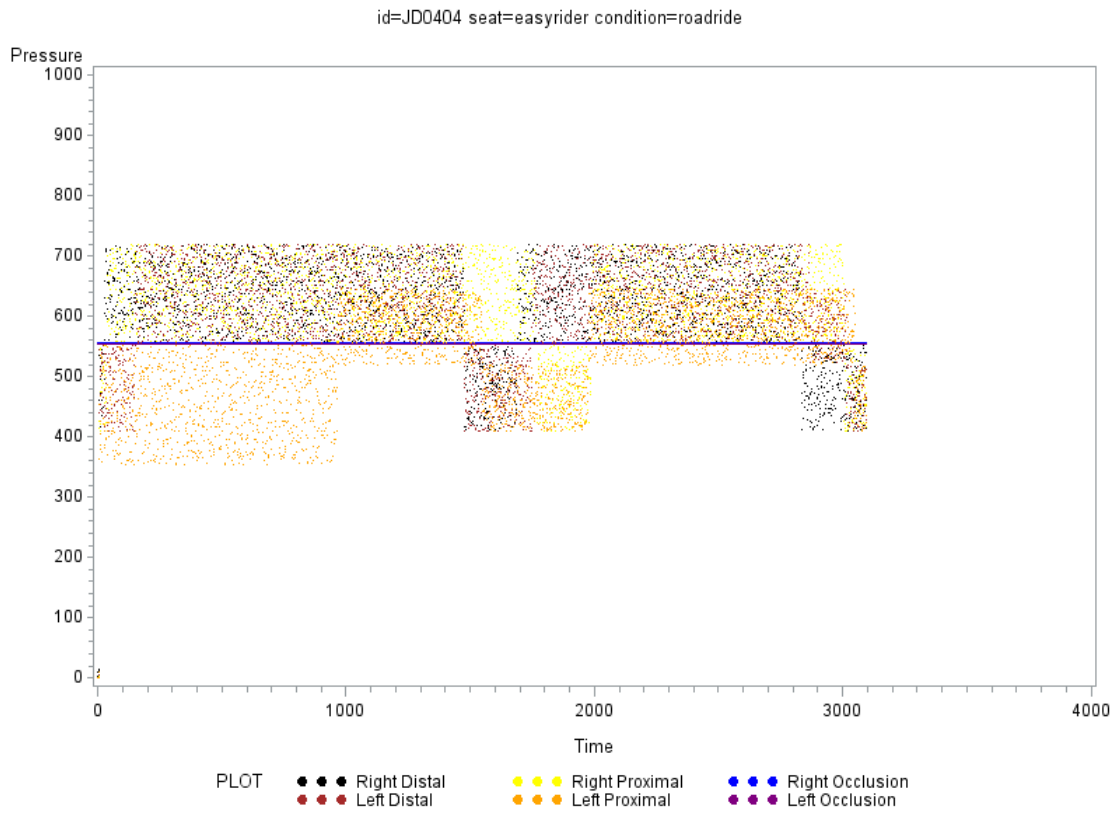

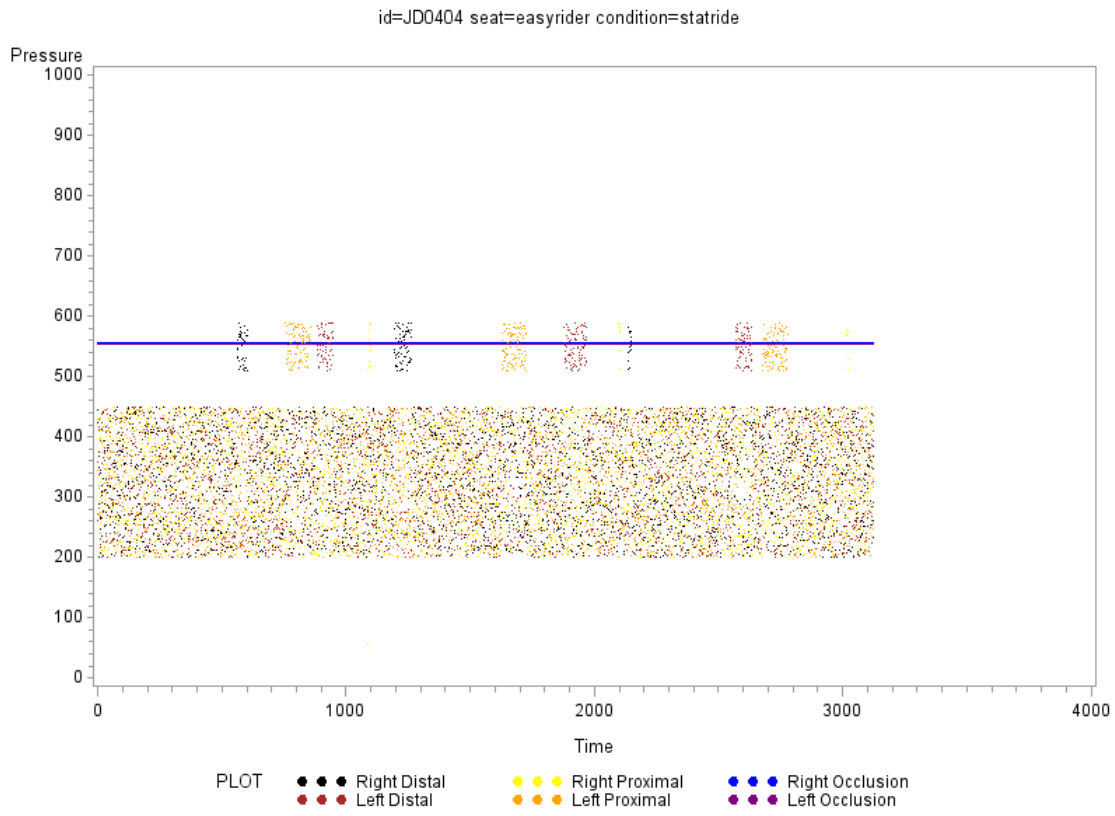

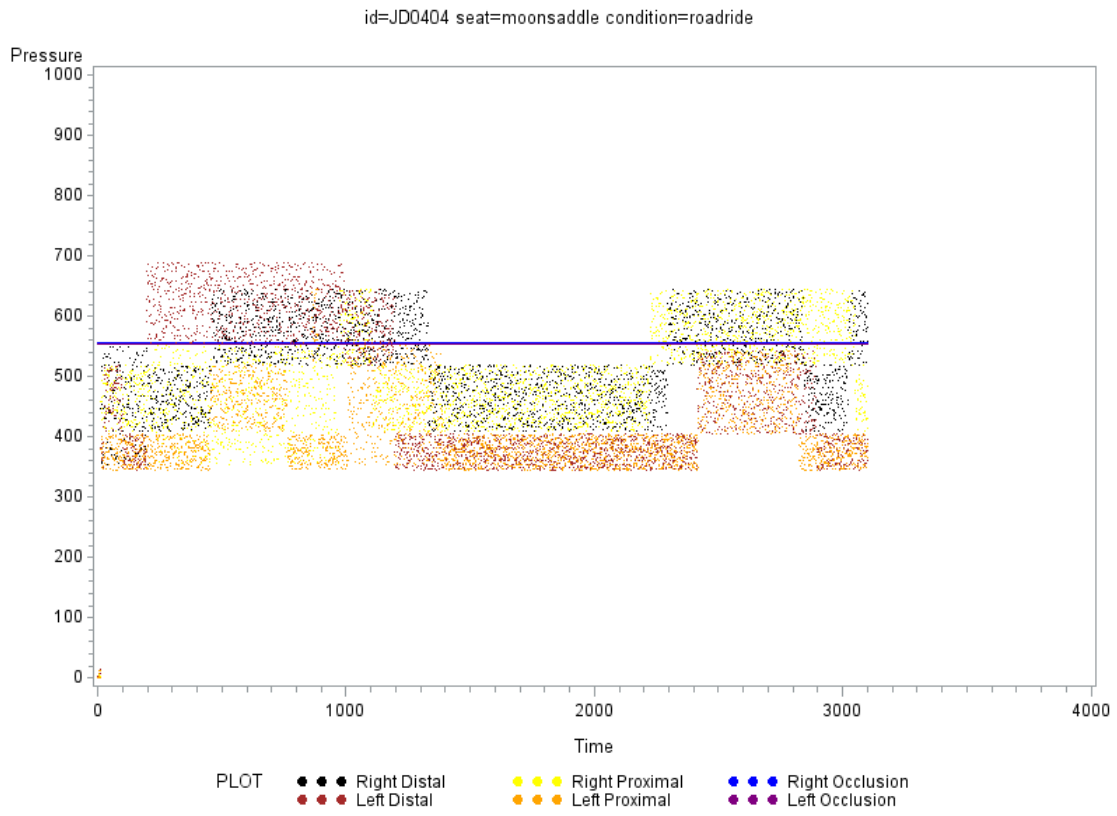

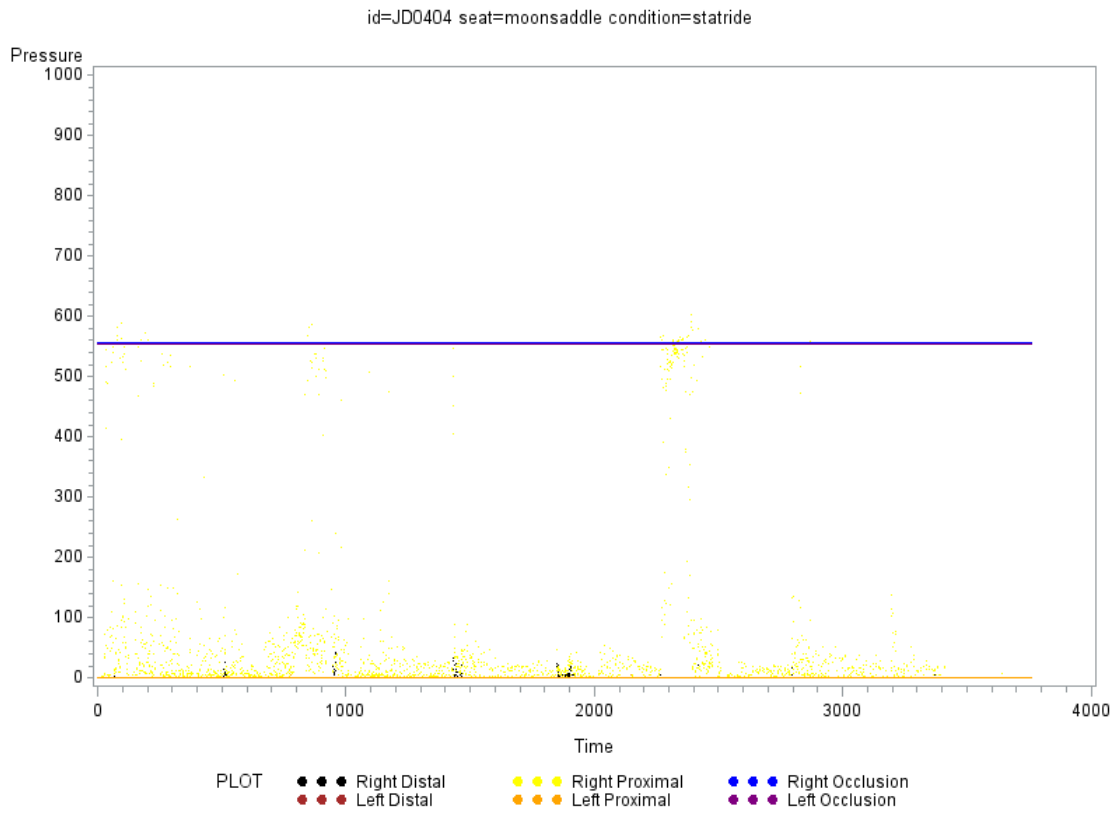



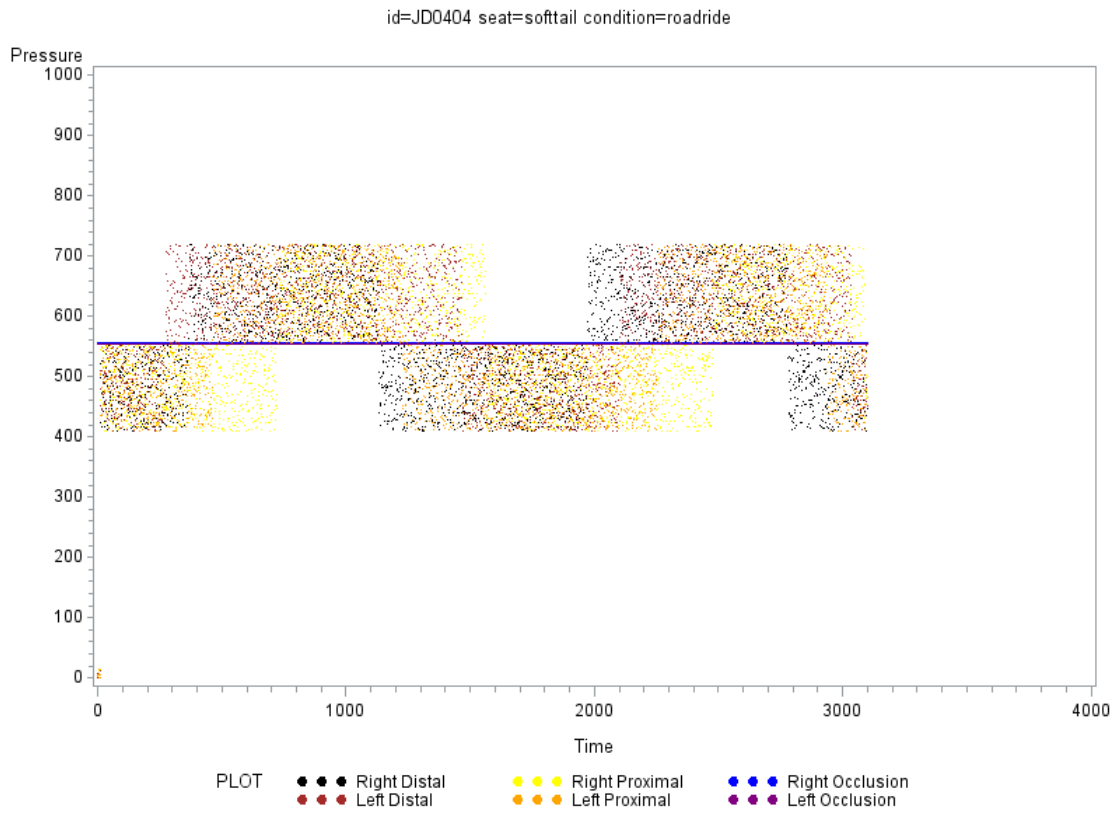

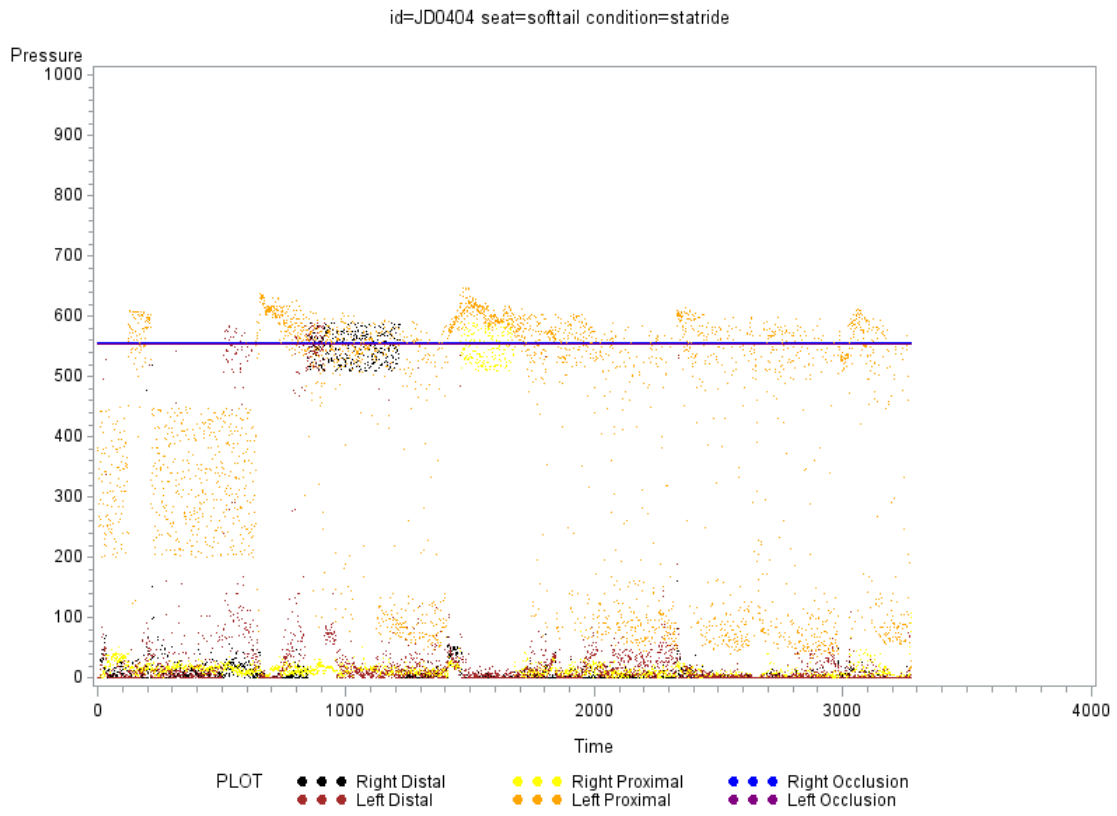

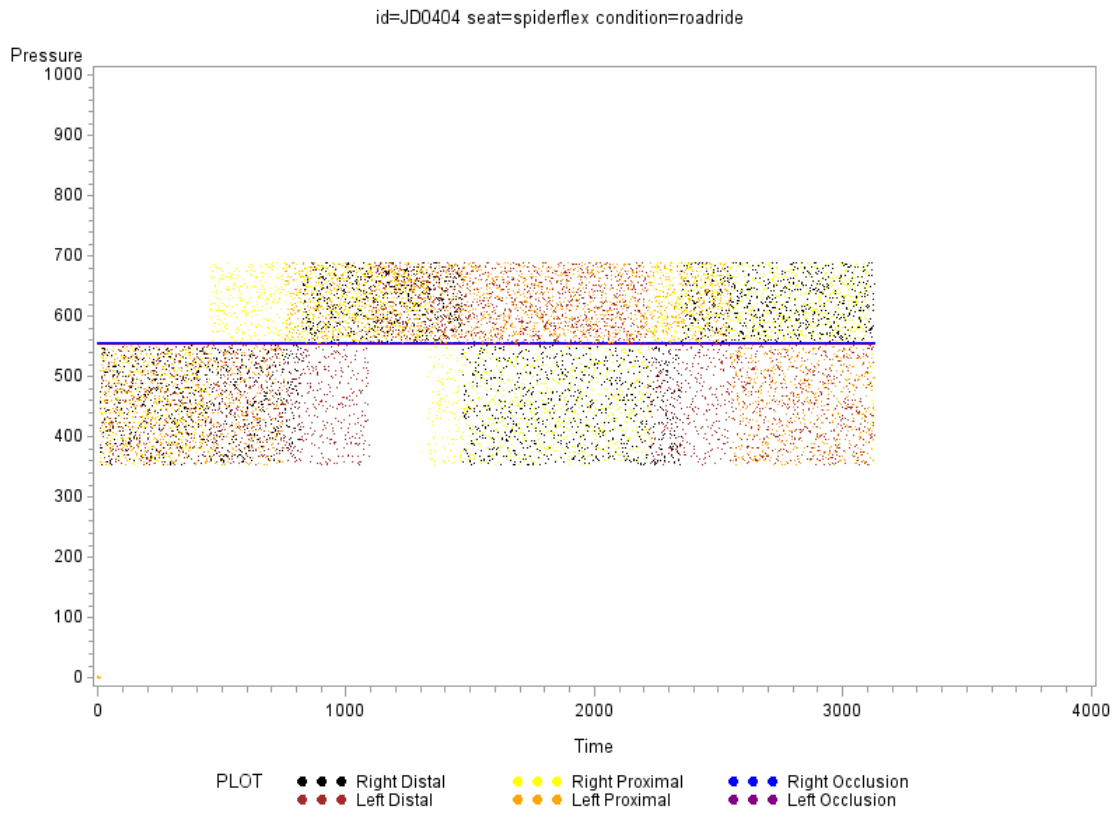

id=JD0404 seat=spiderflex condition=statride

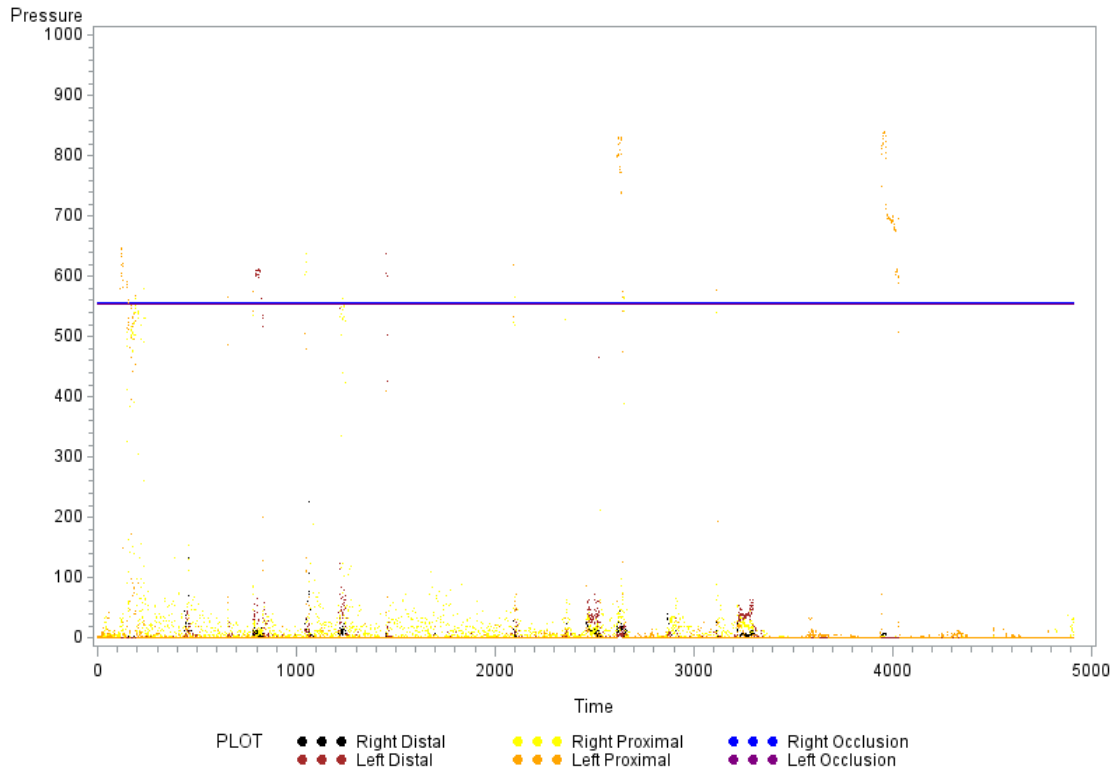

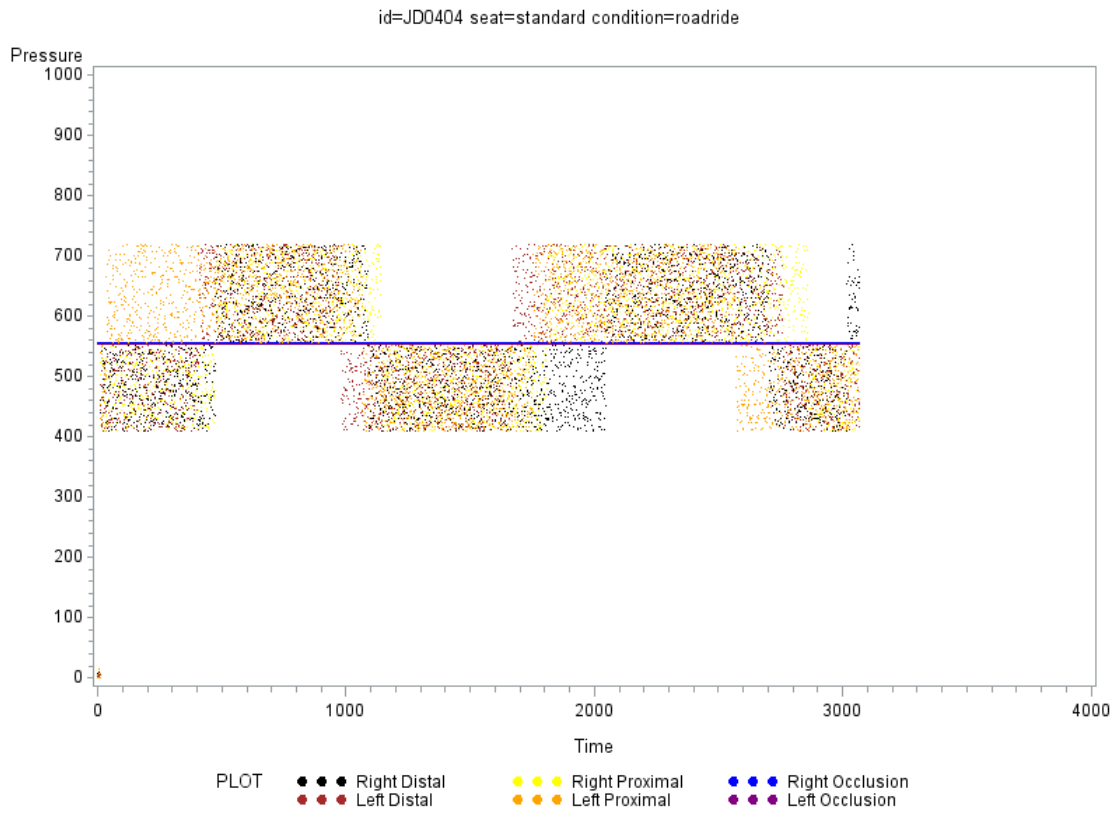

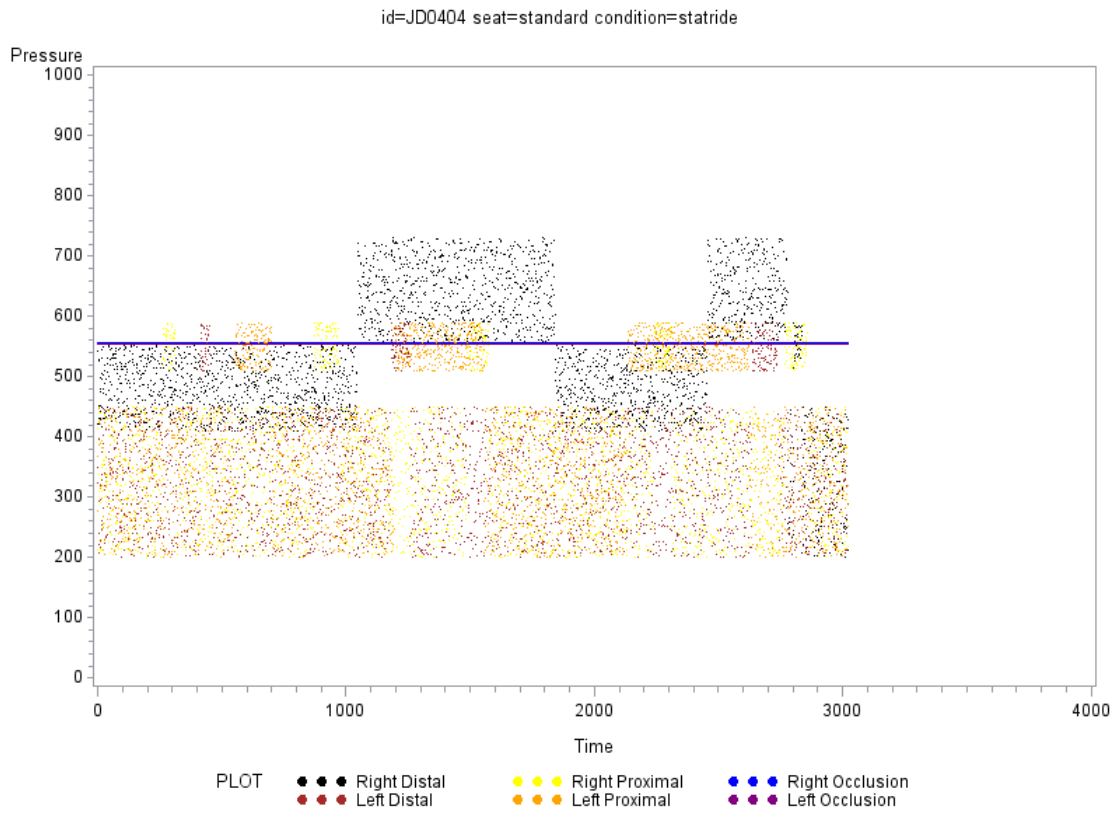

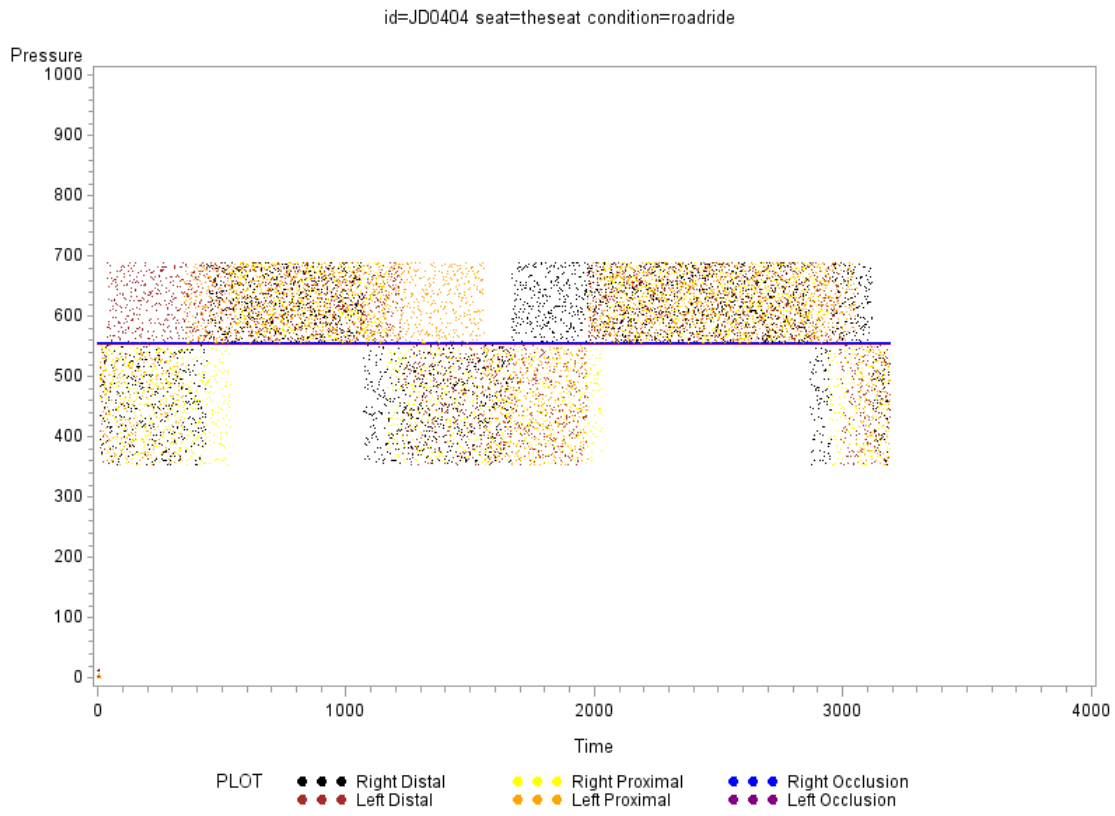

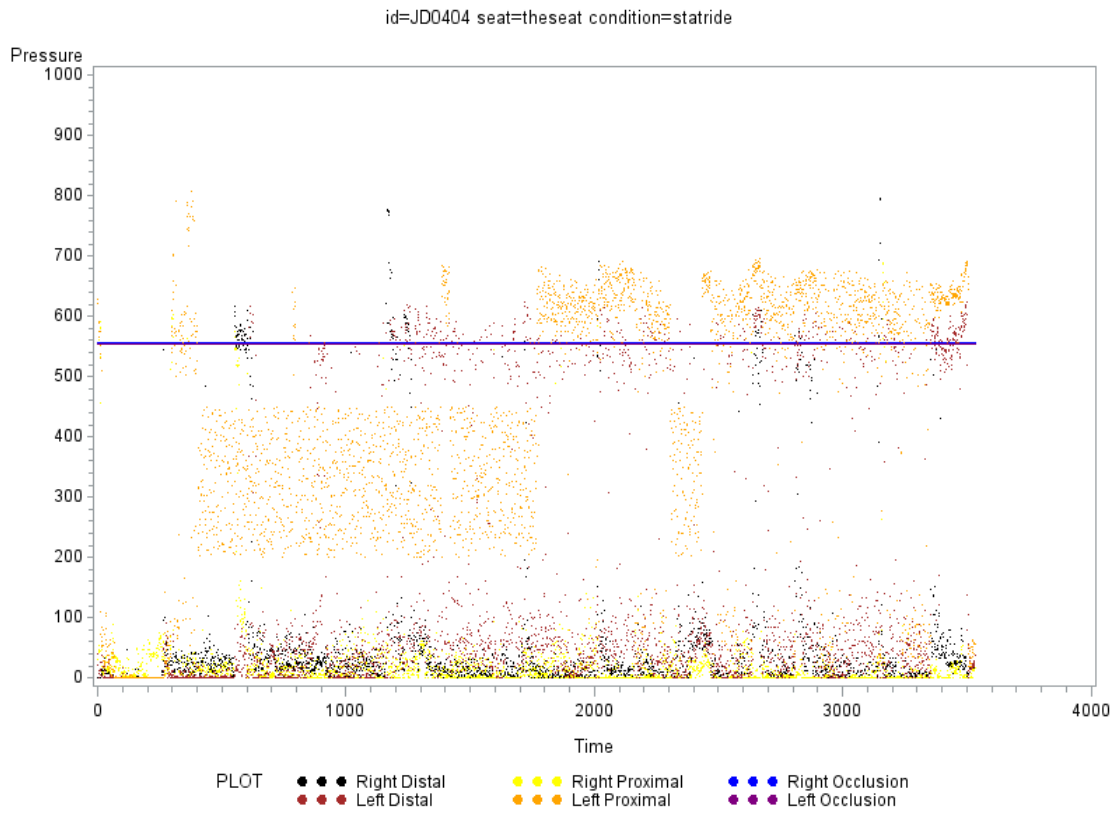



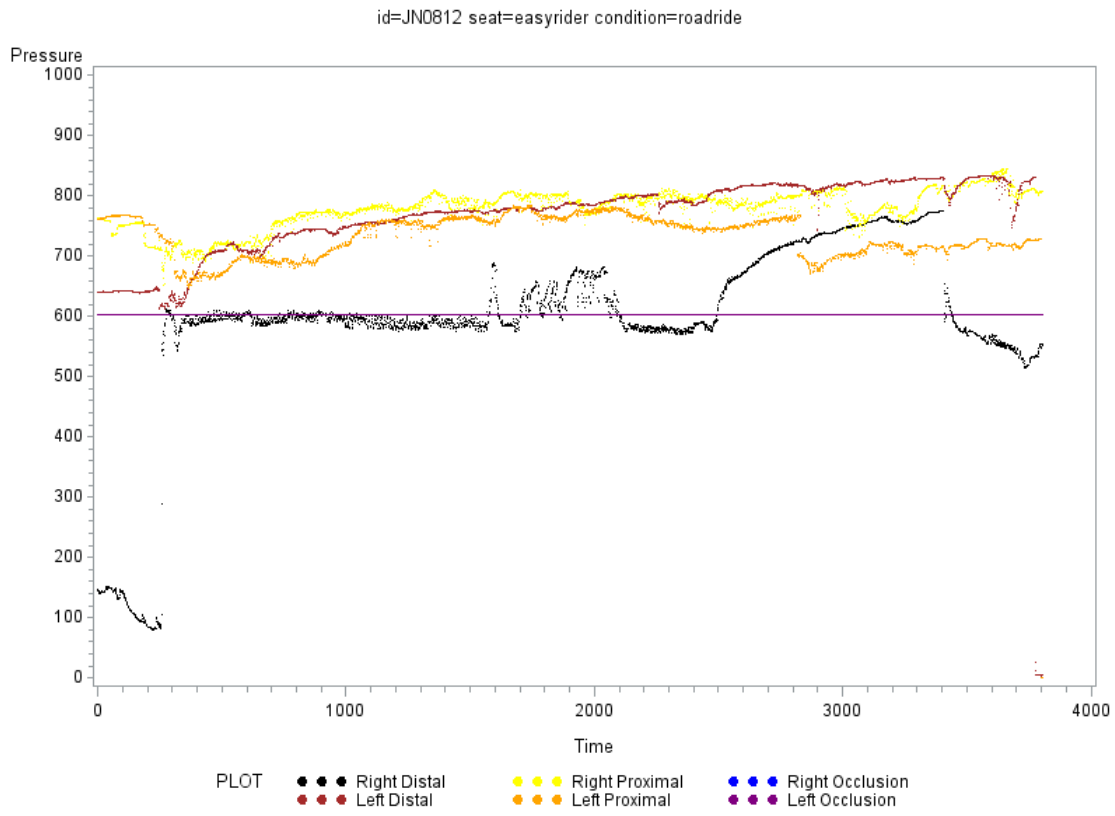

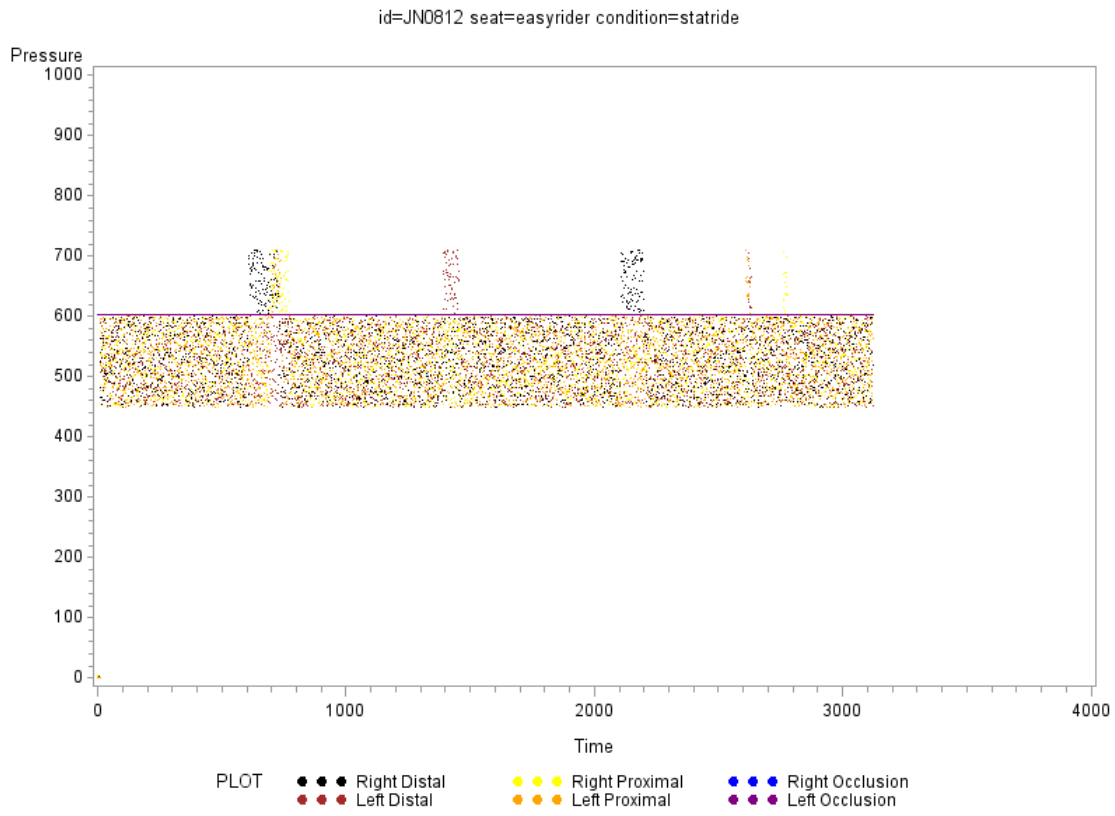

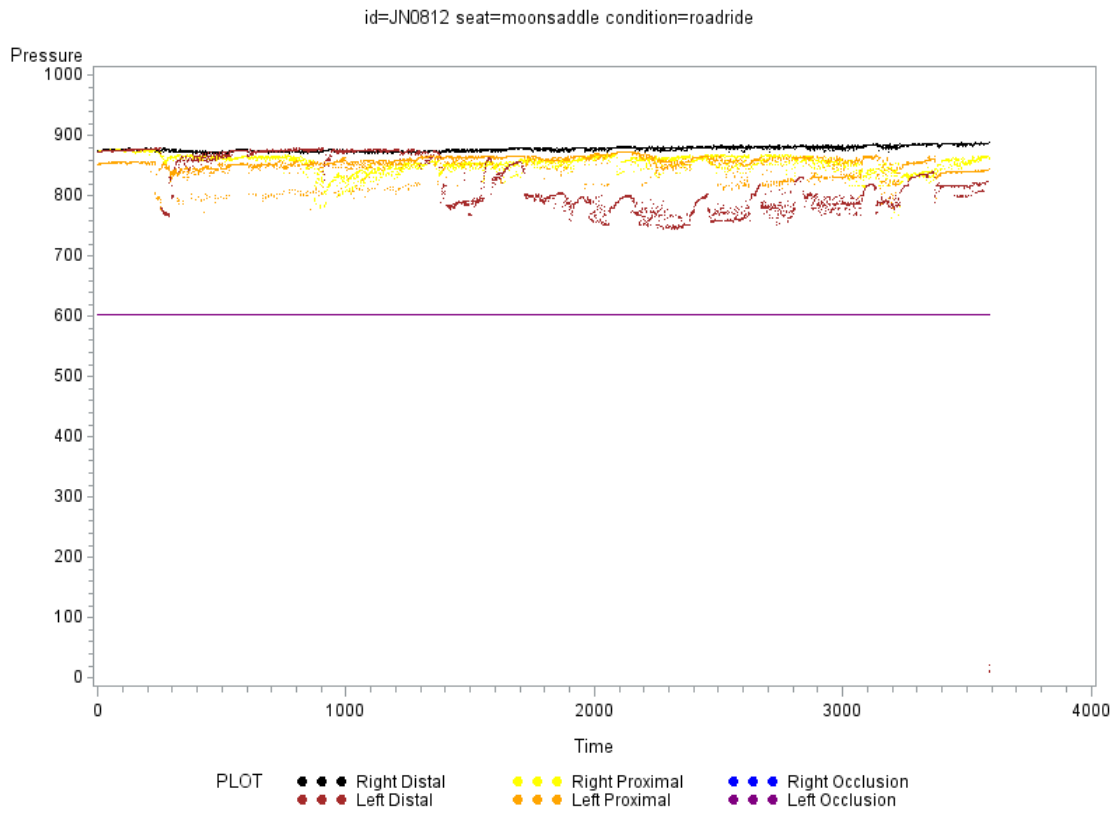

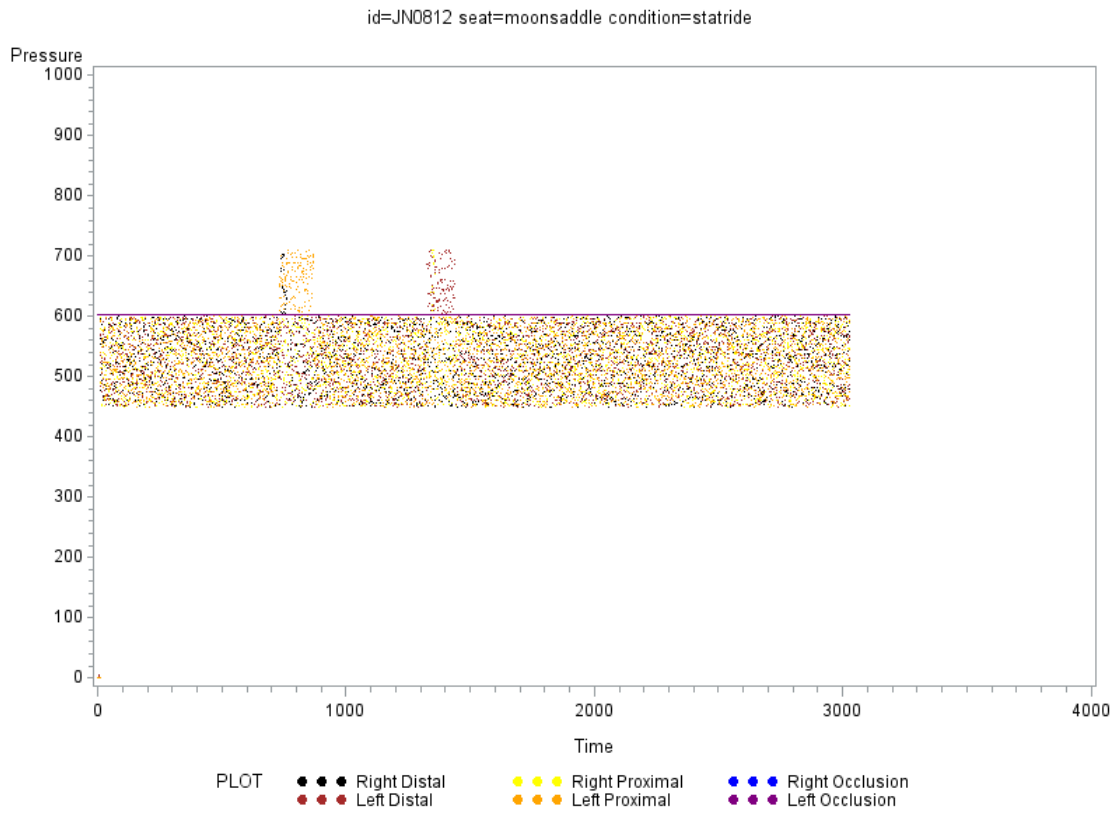

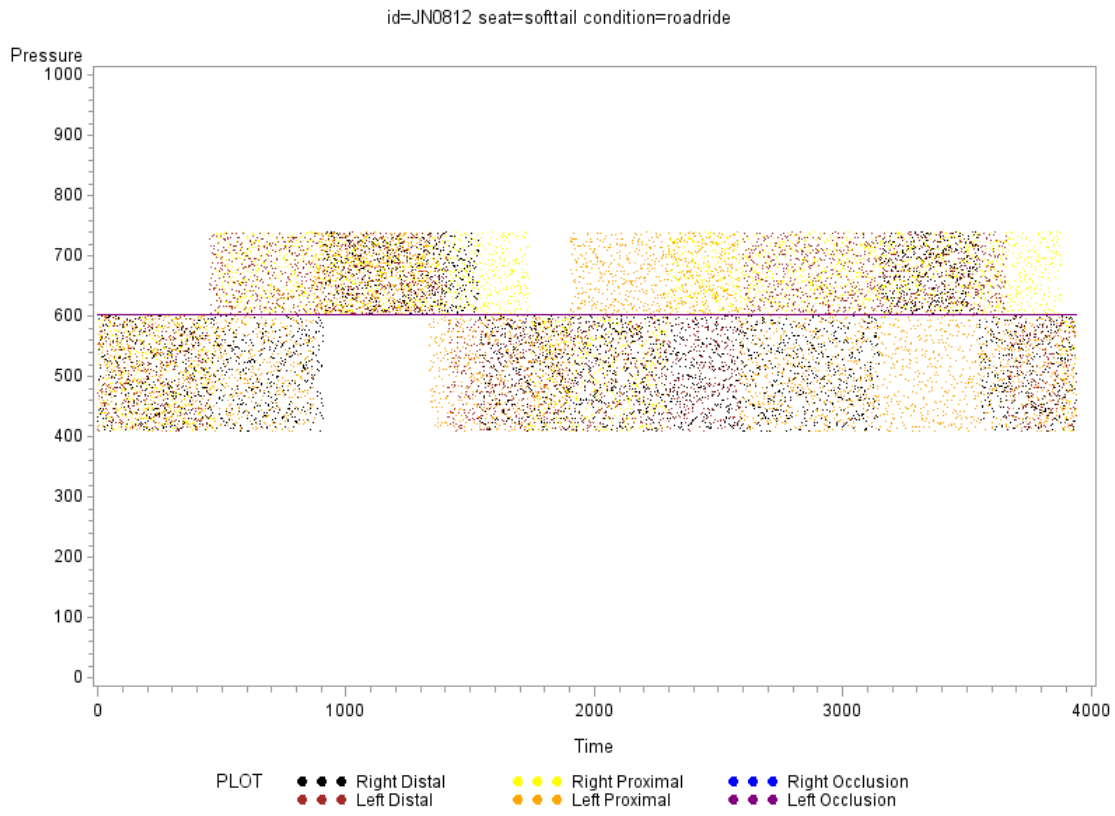

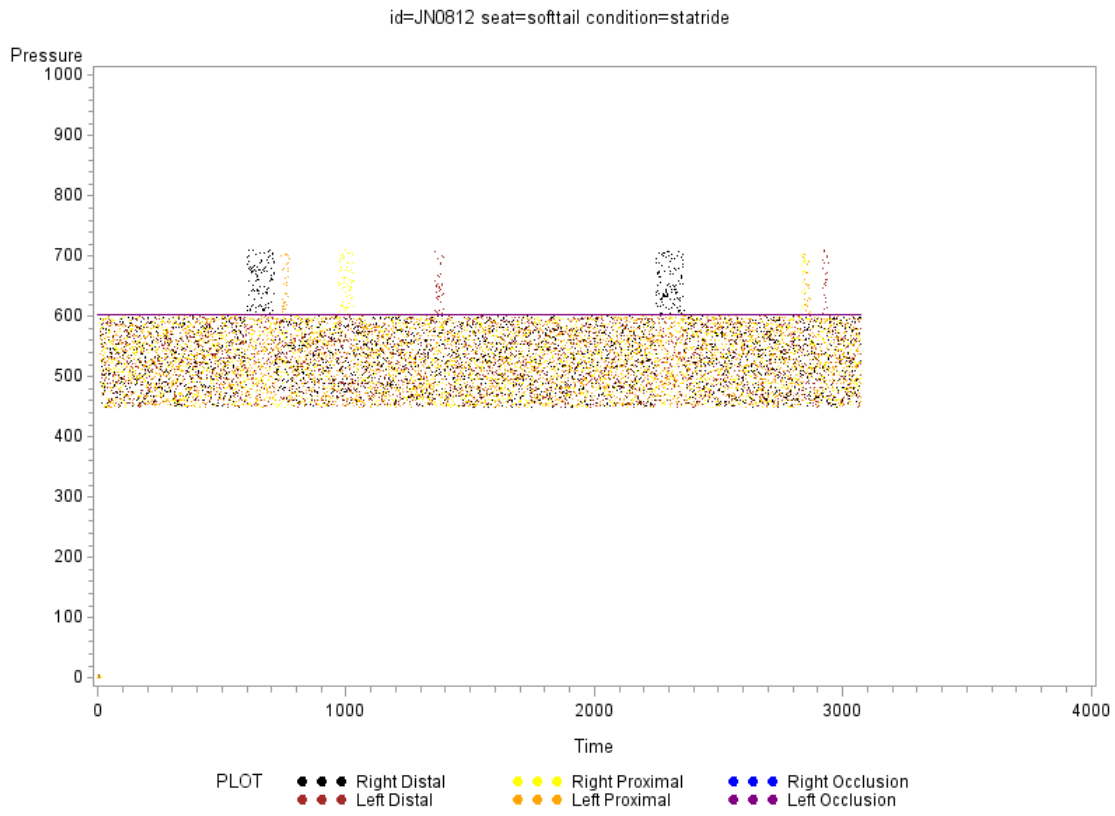

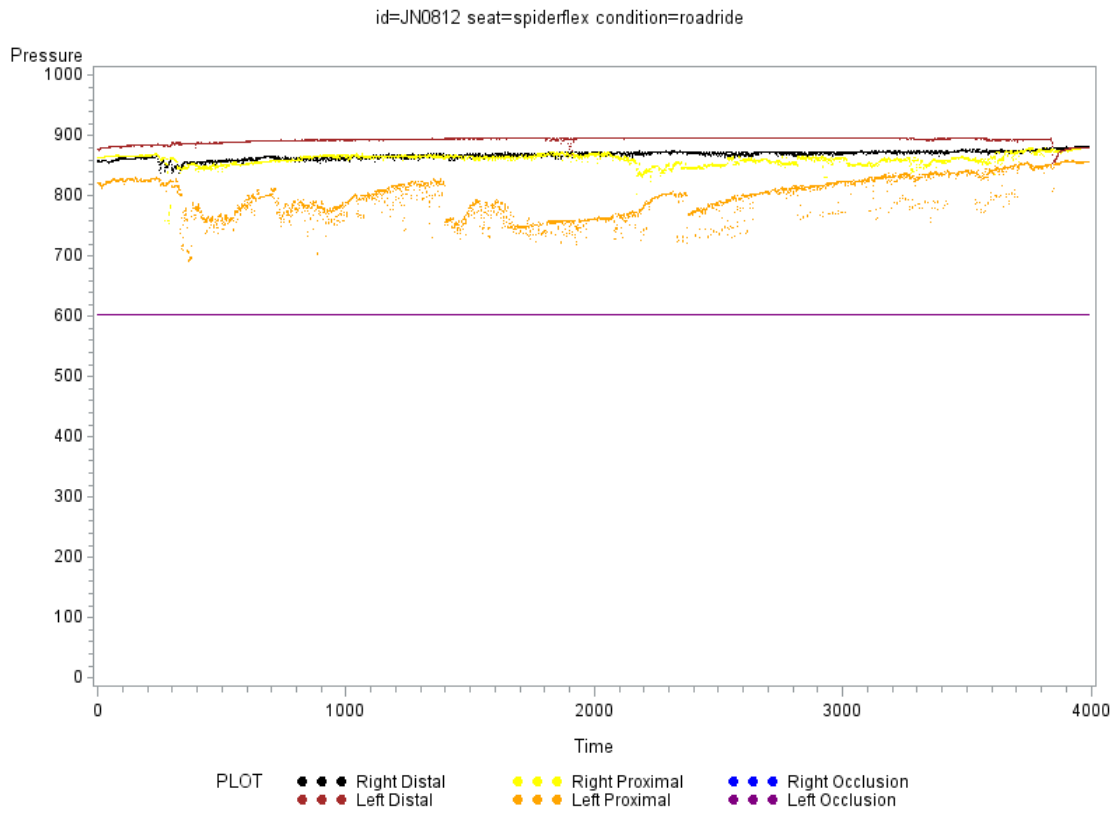

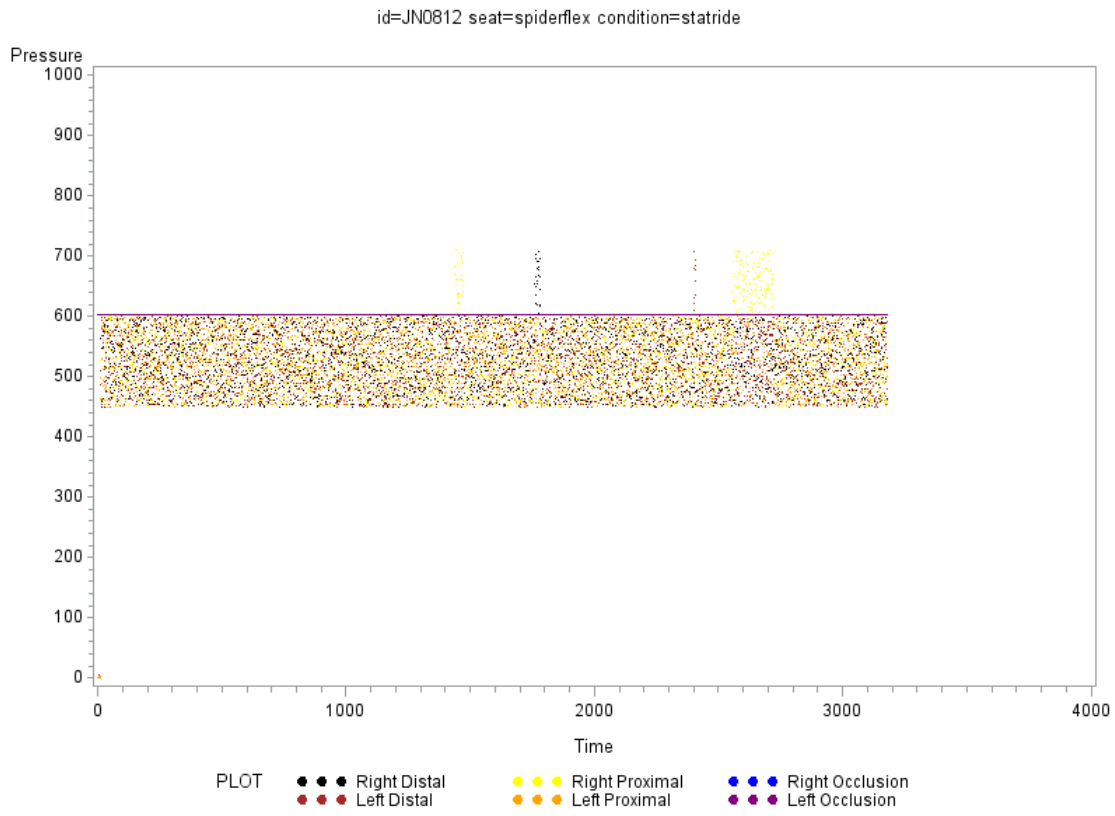



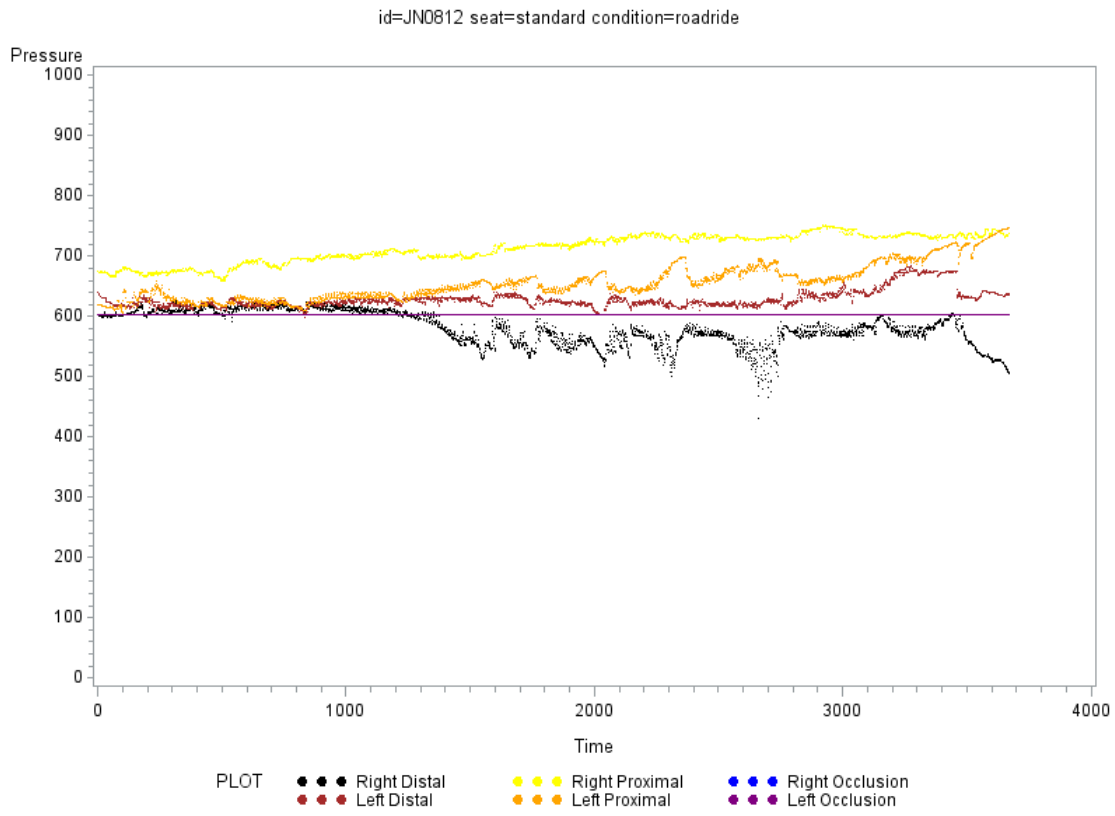

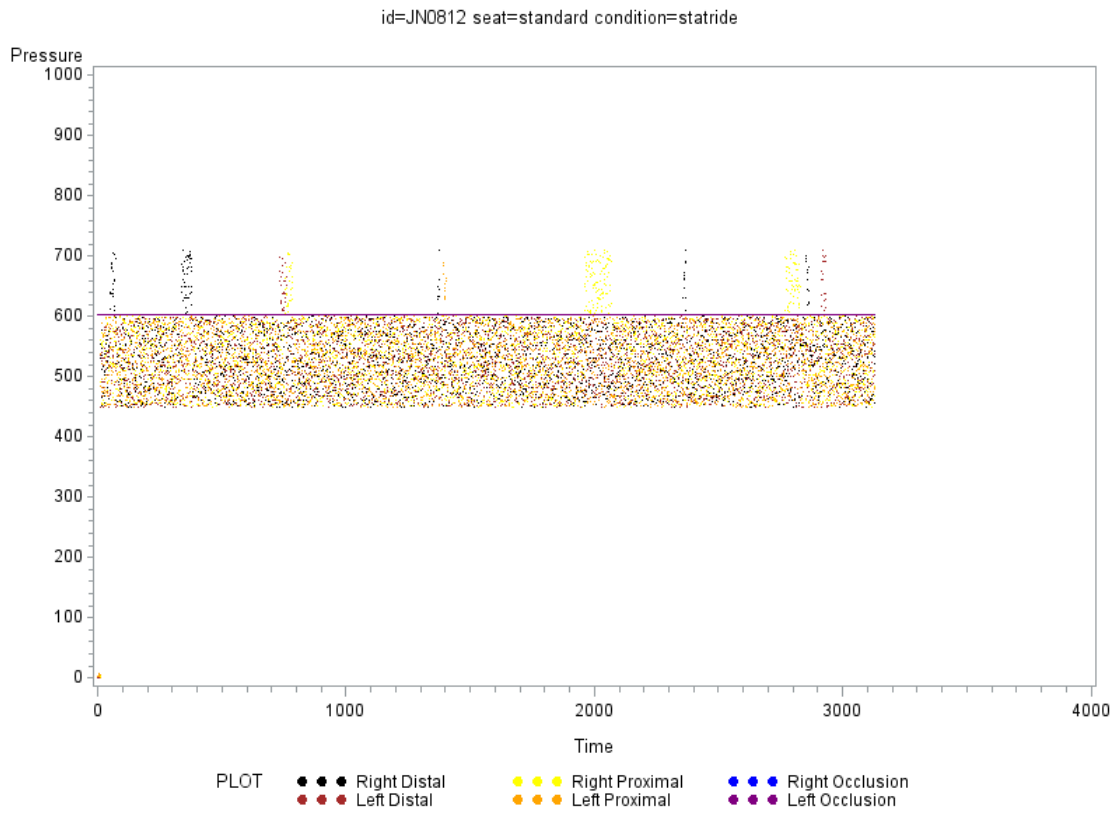

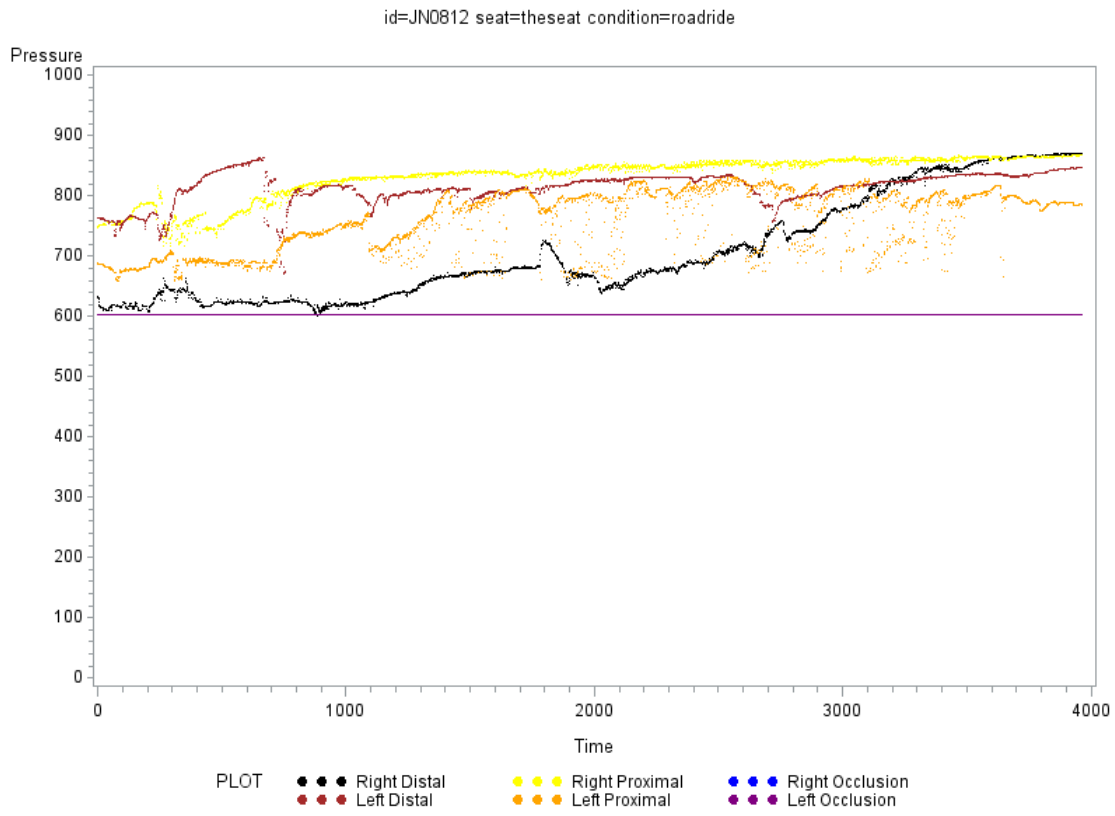

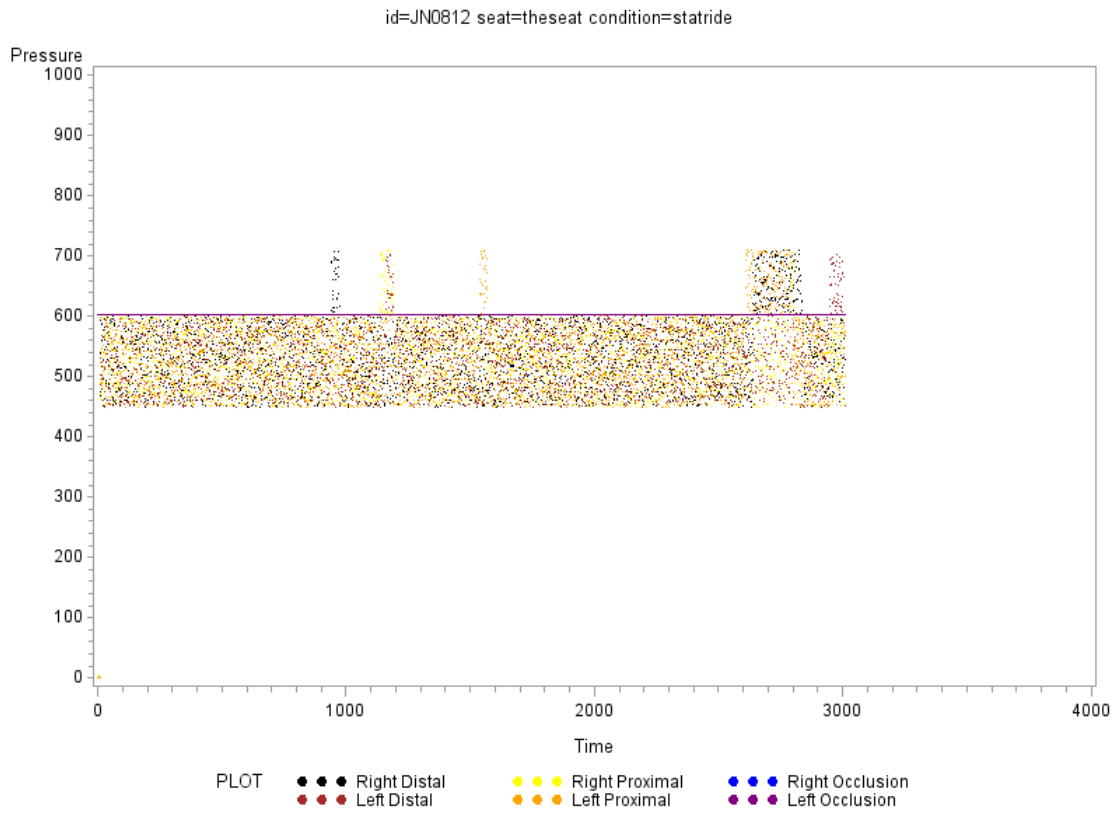

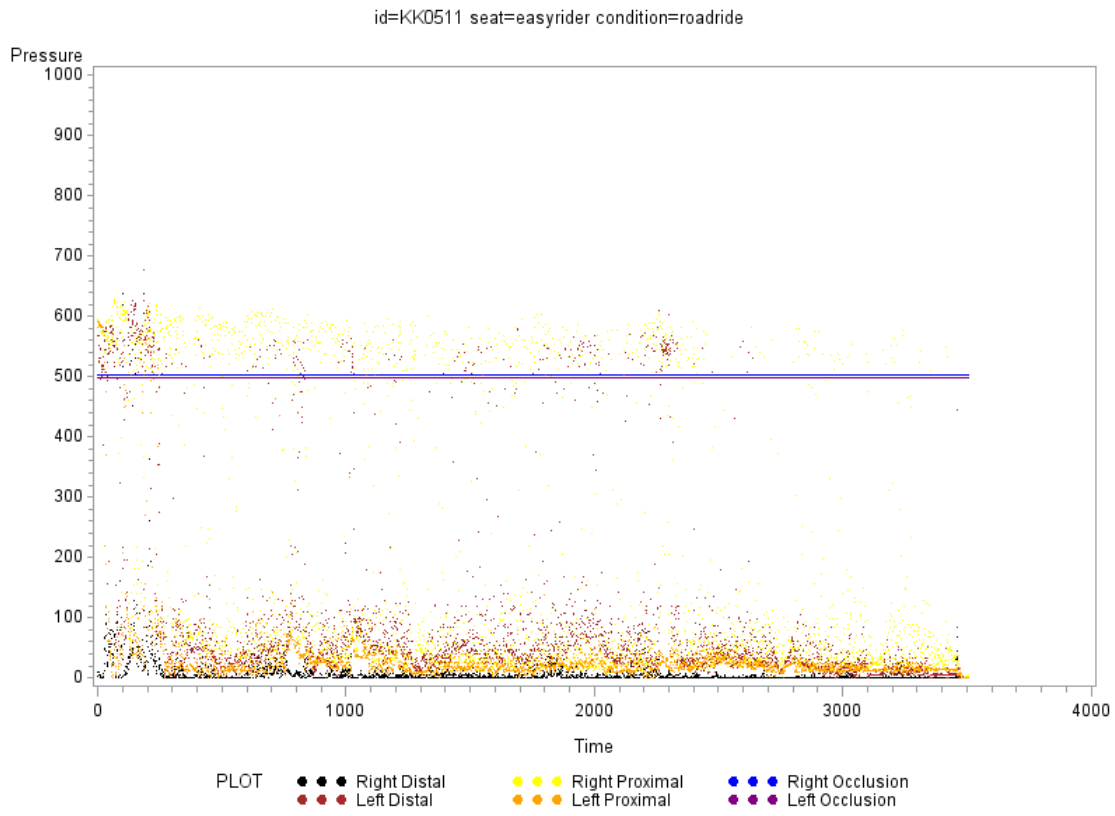

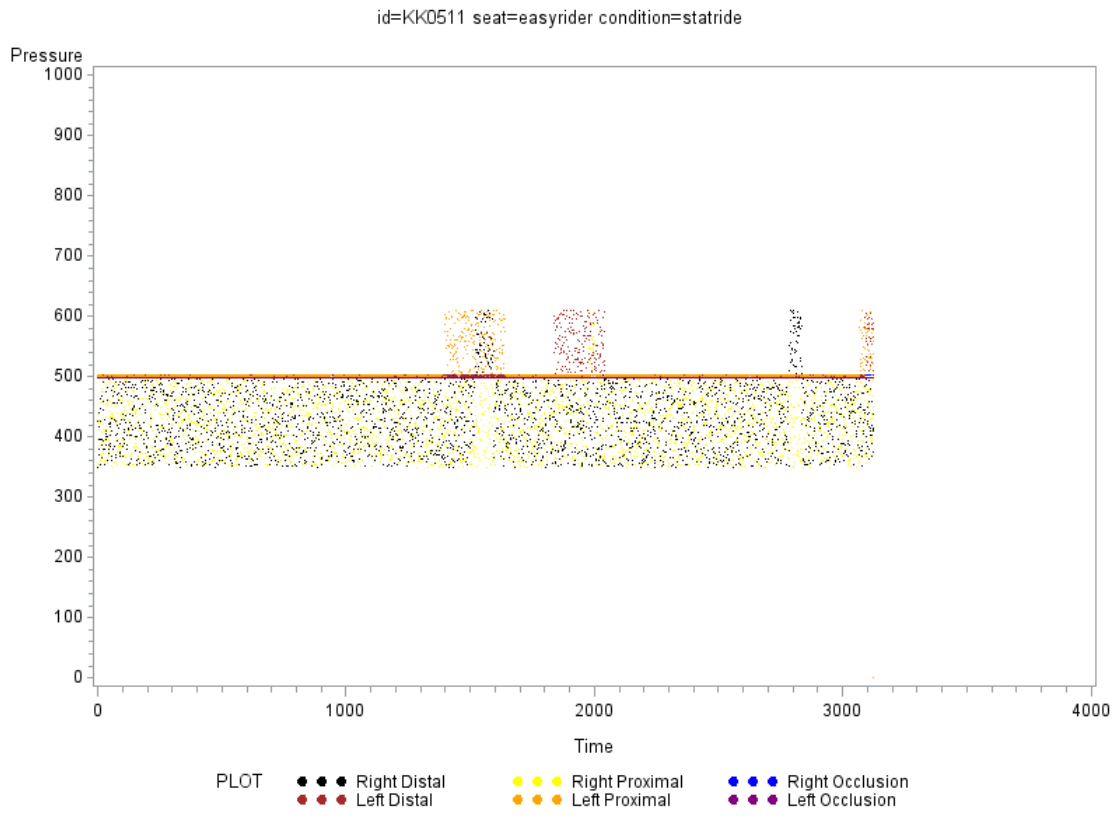

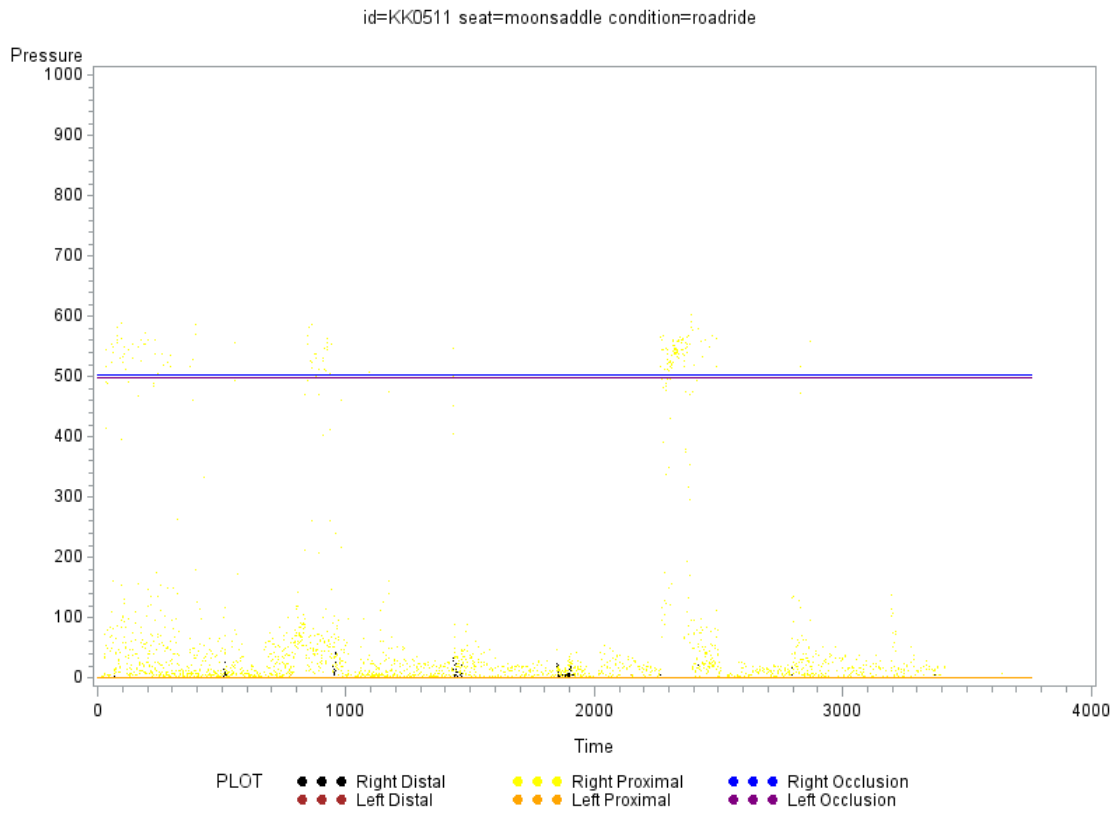

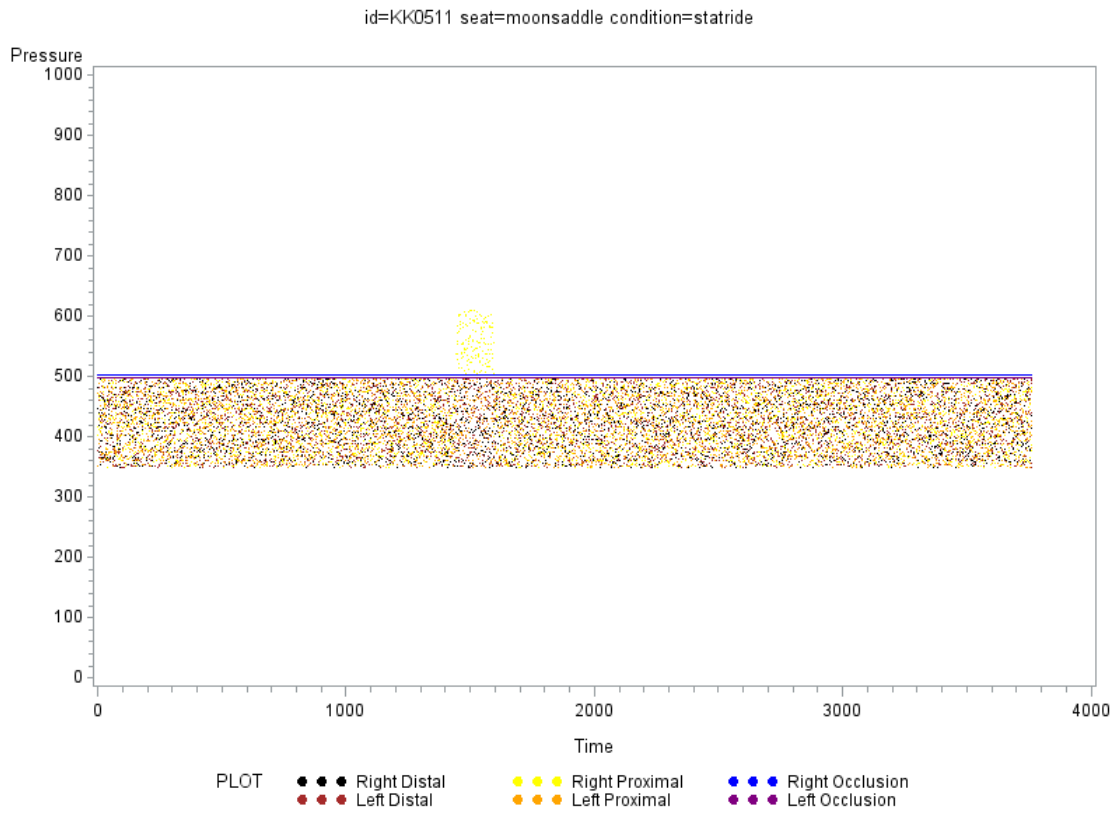



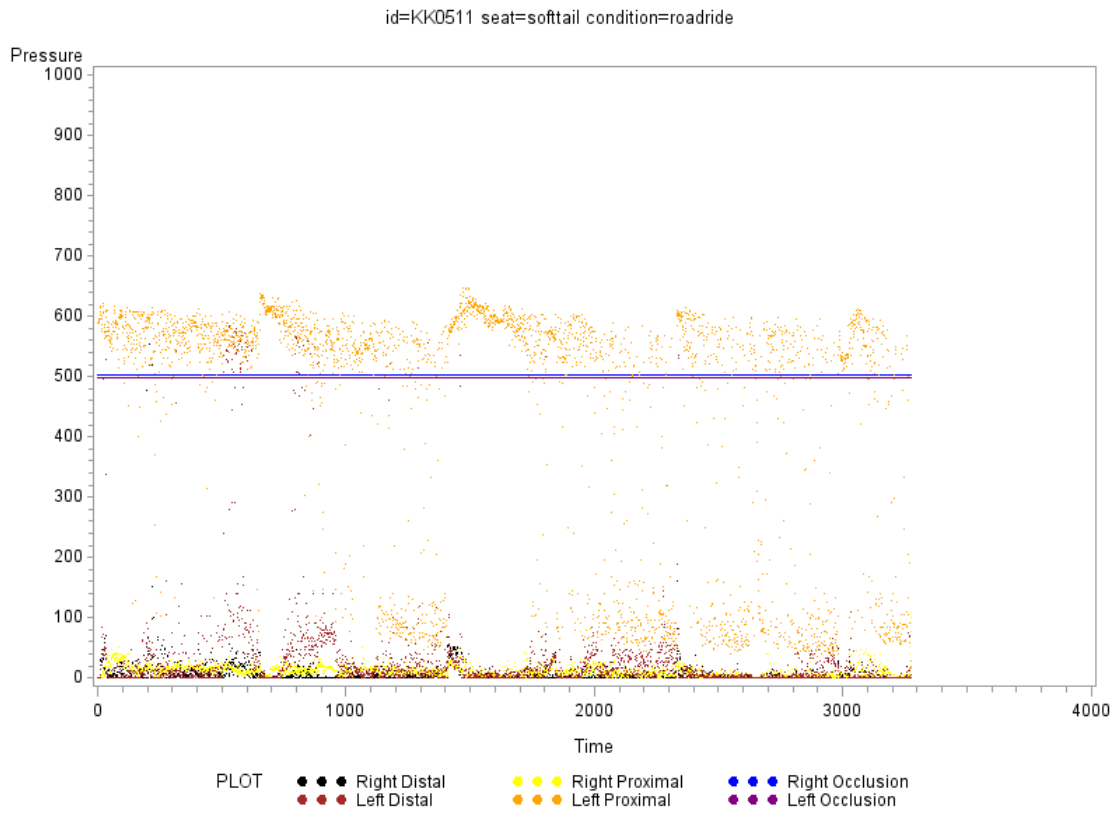

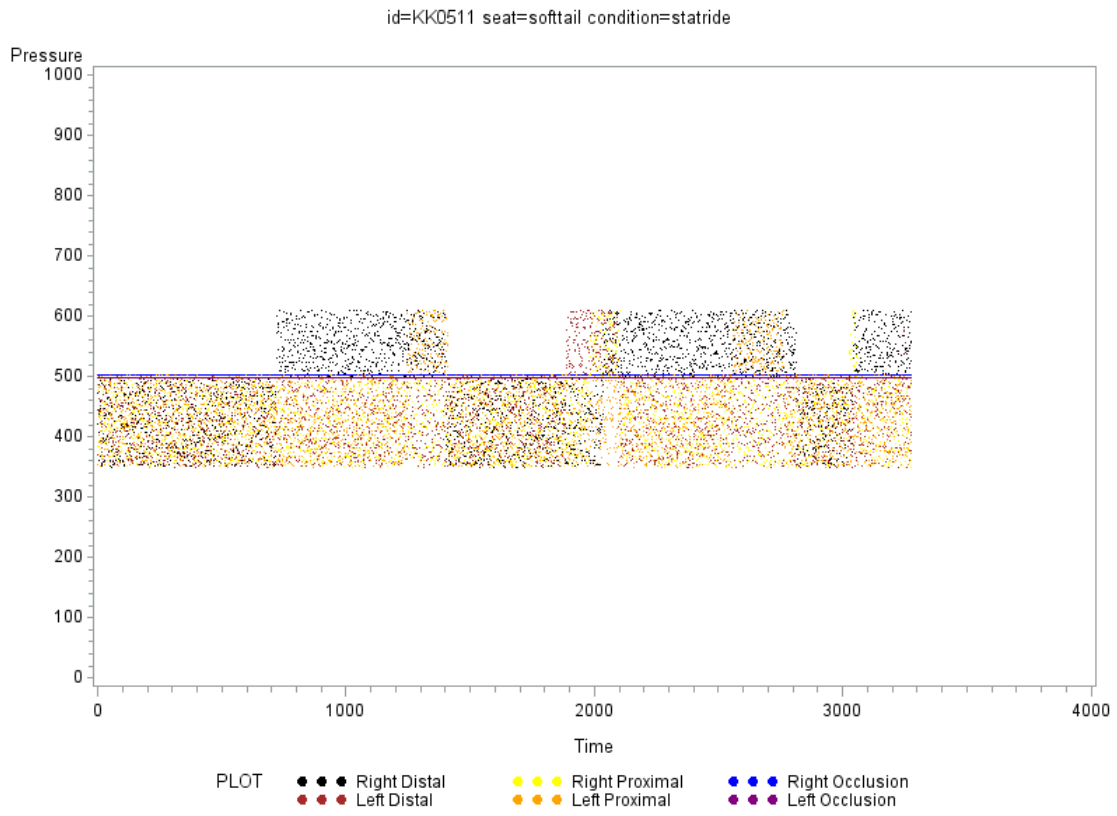

id=KK0511 seat=spiderflex condition=roadride

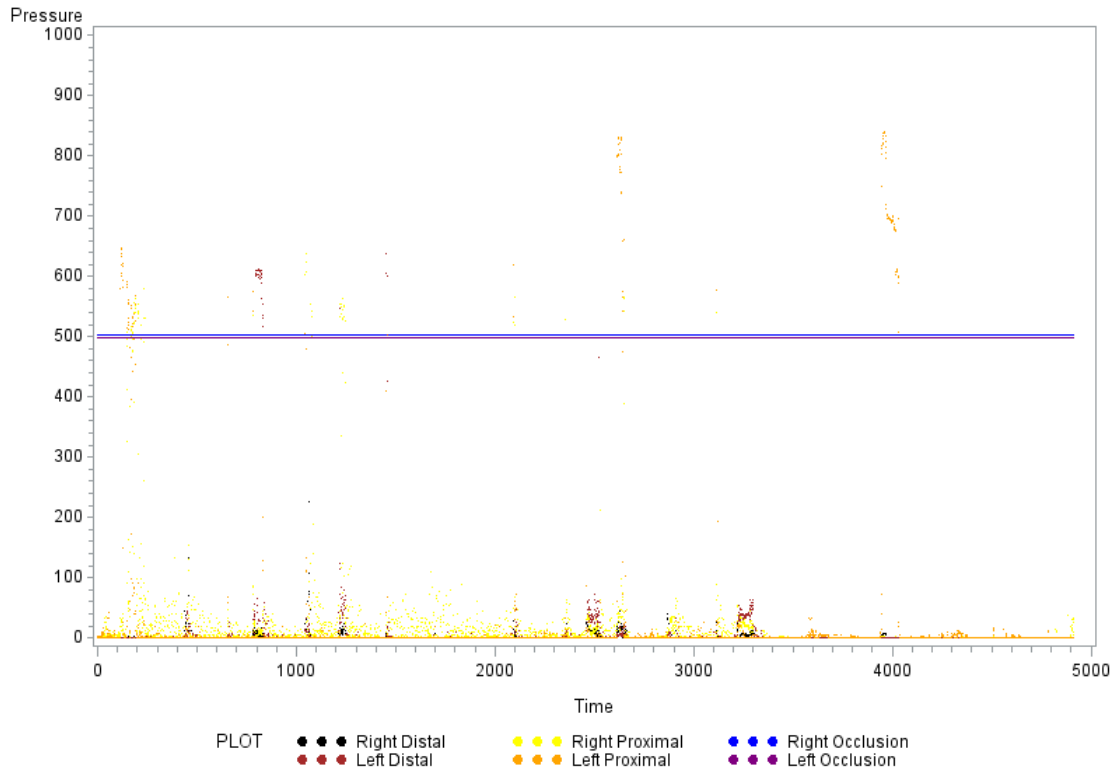

id=KK0511 seat=spiderflex condition=statride

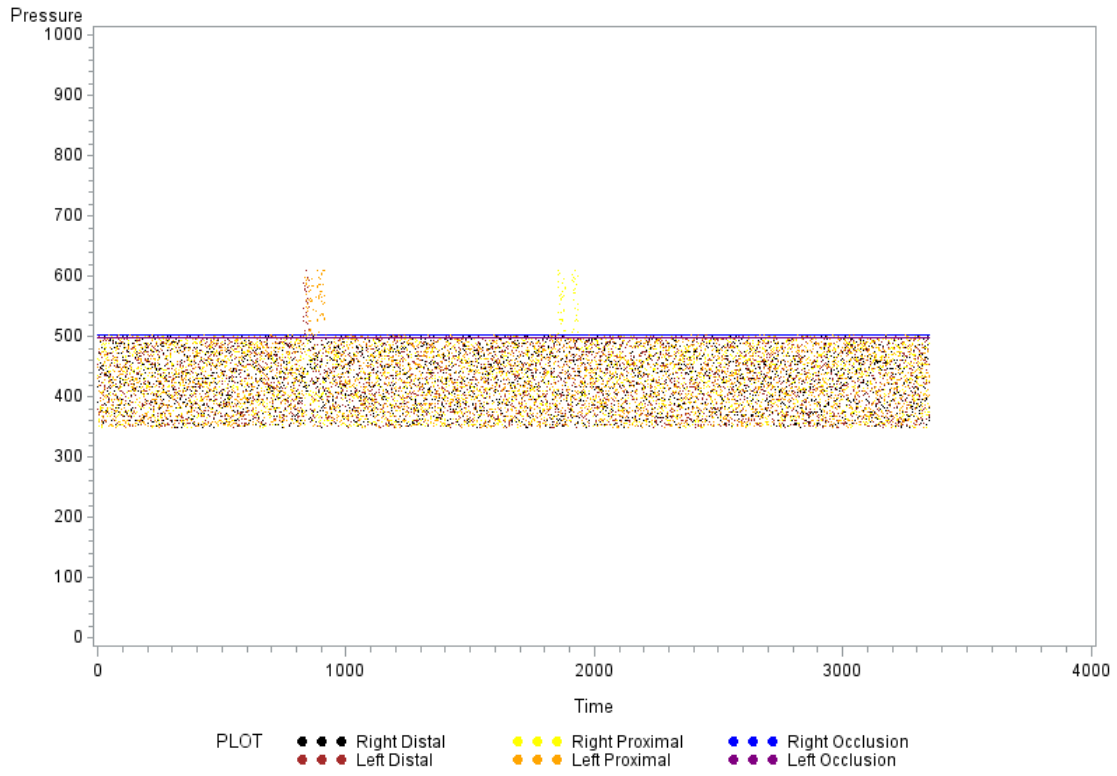

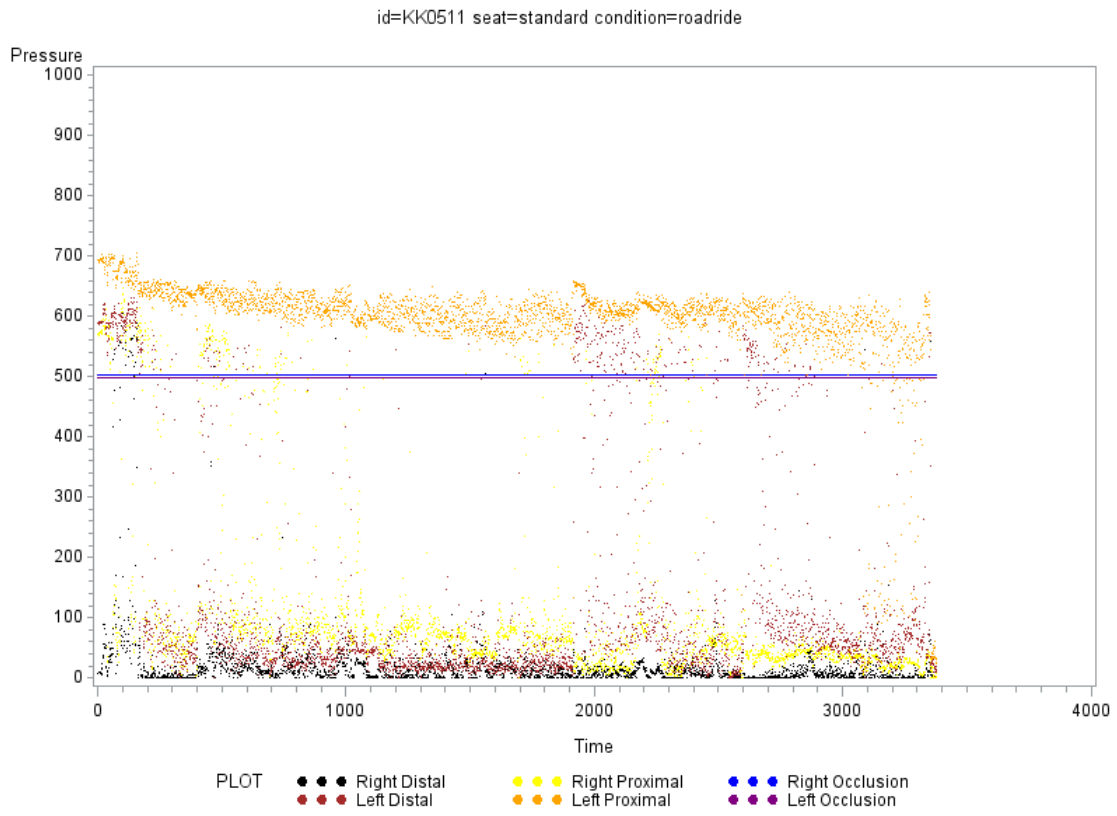

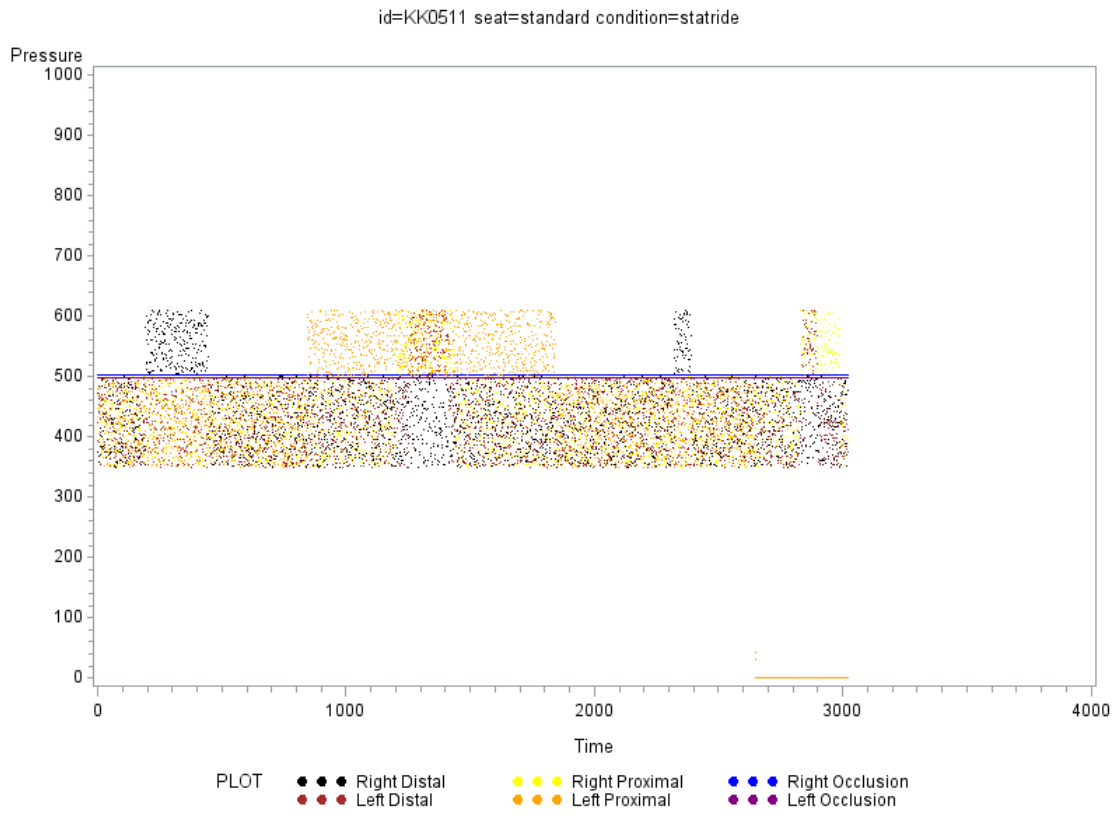

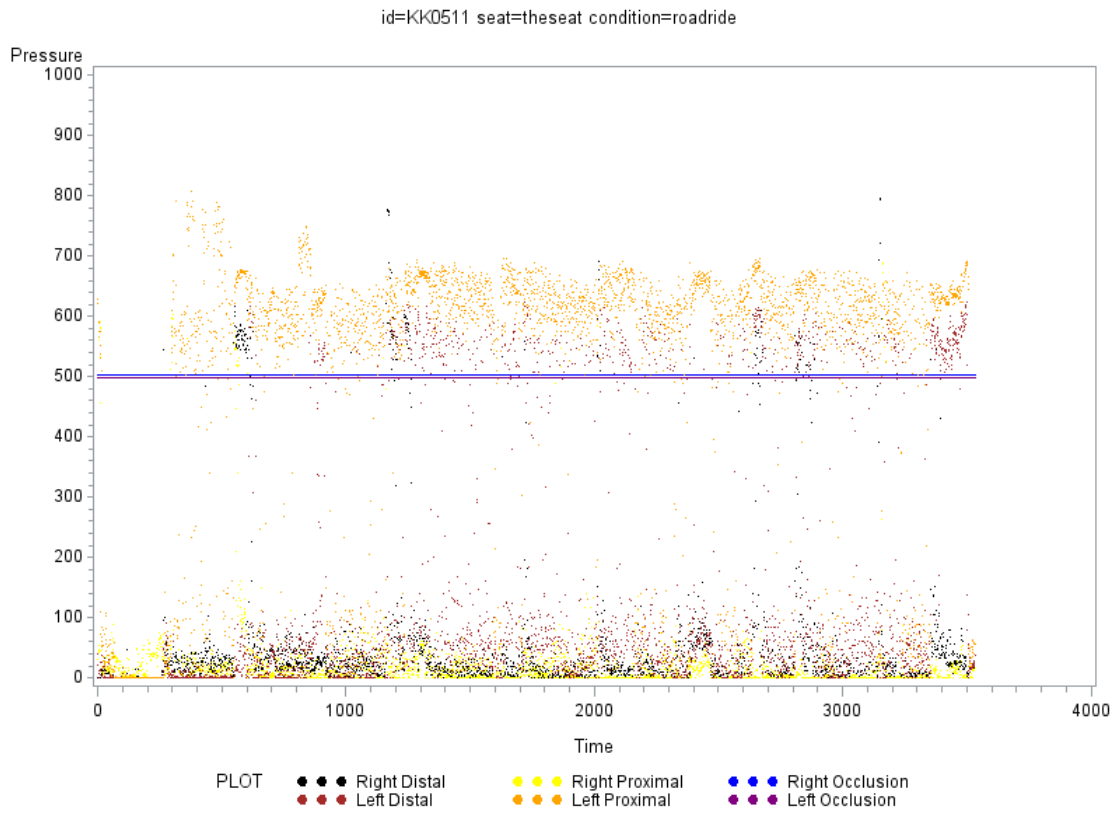

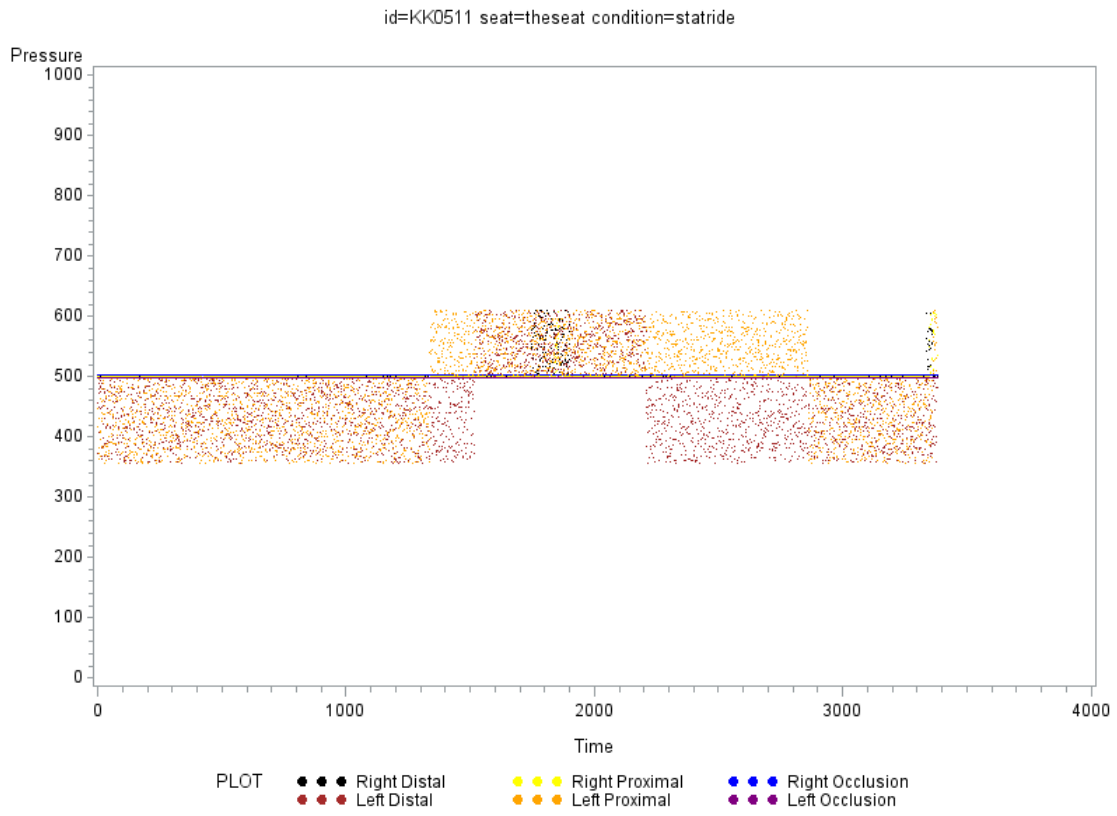



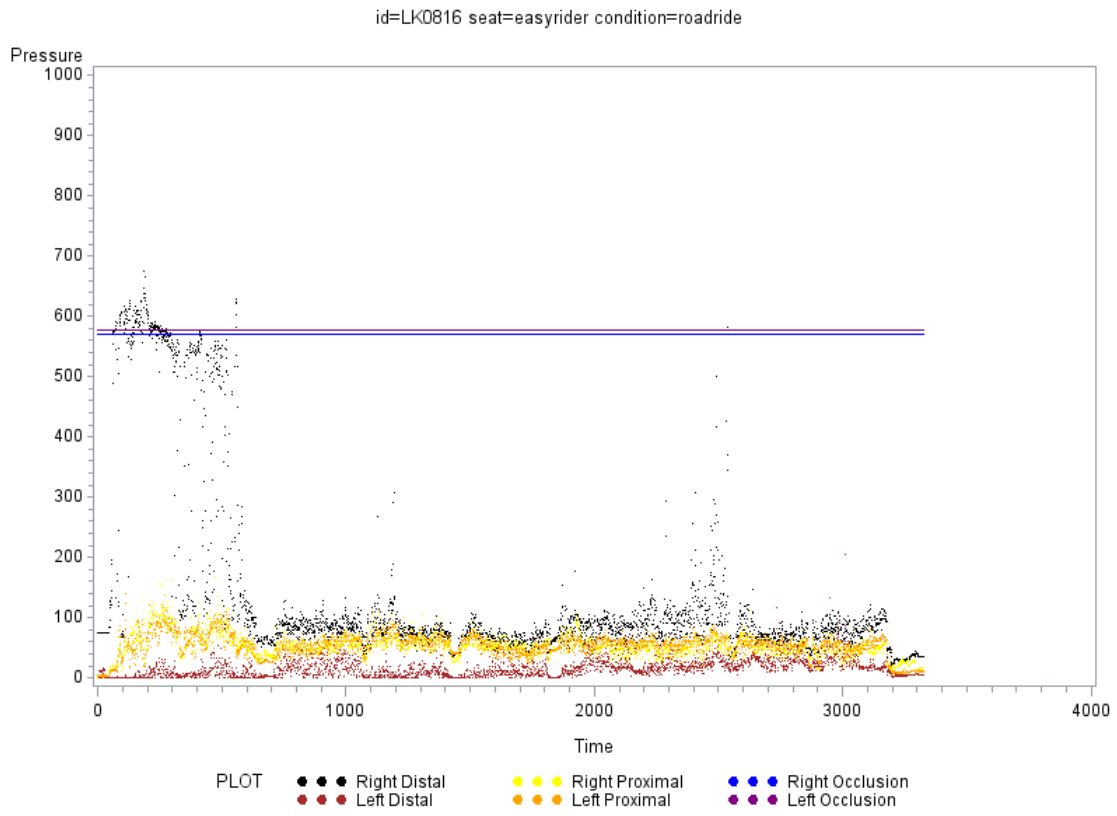

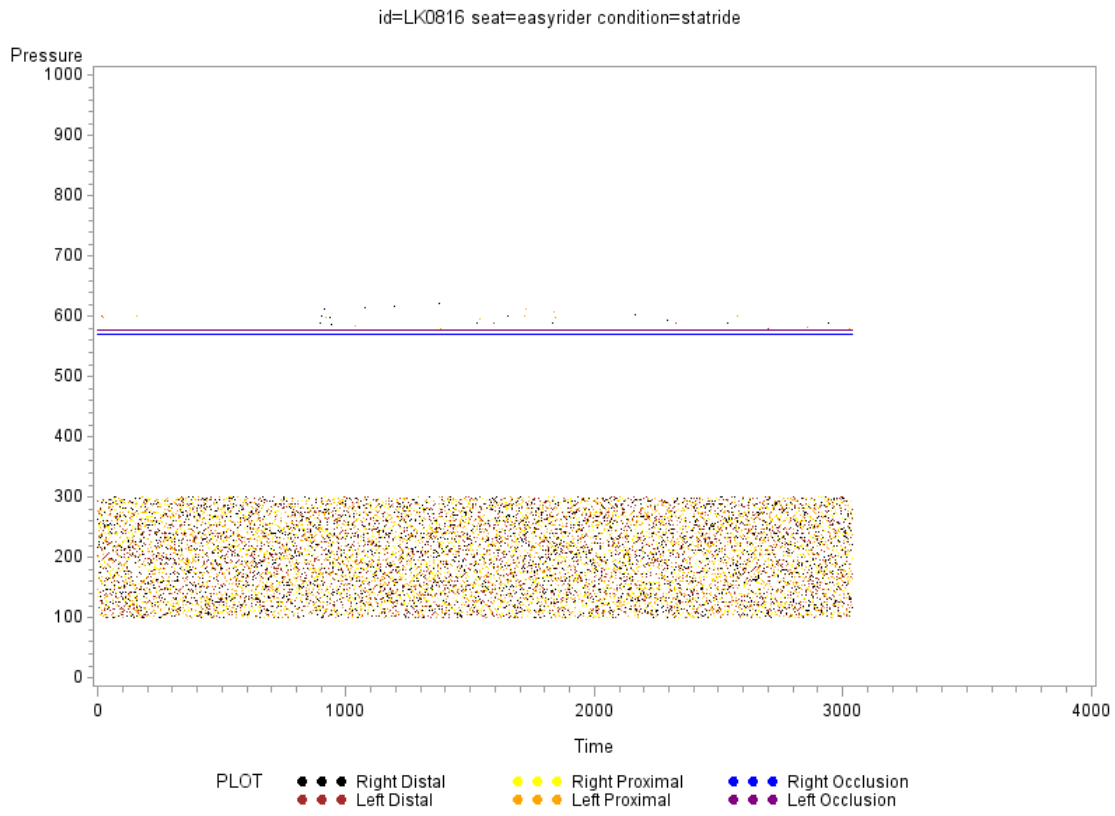

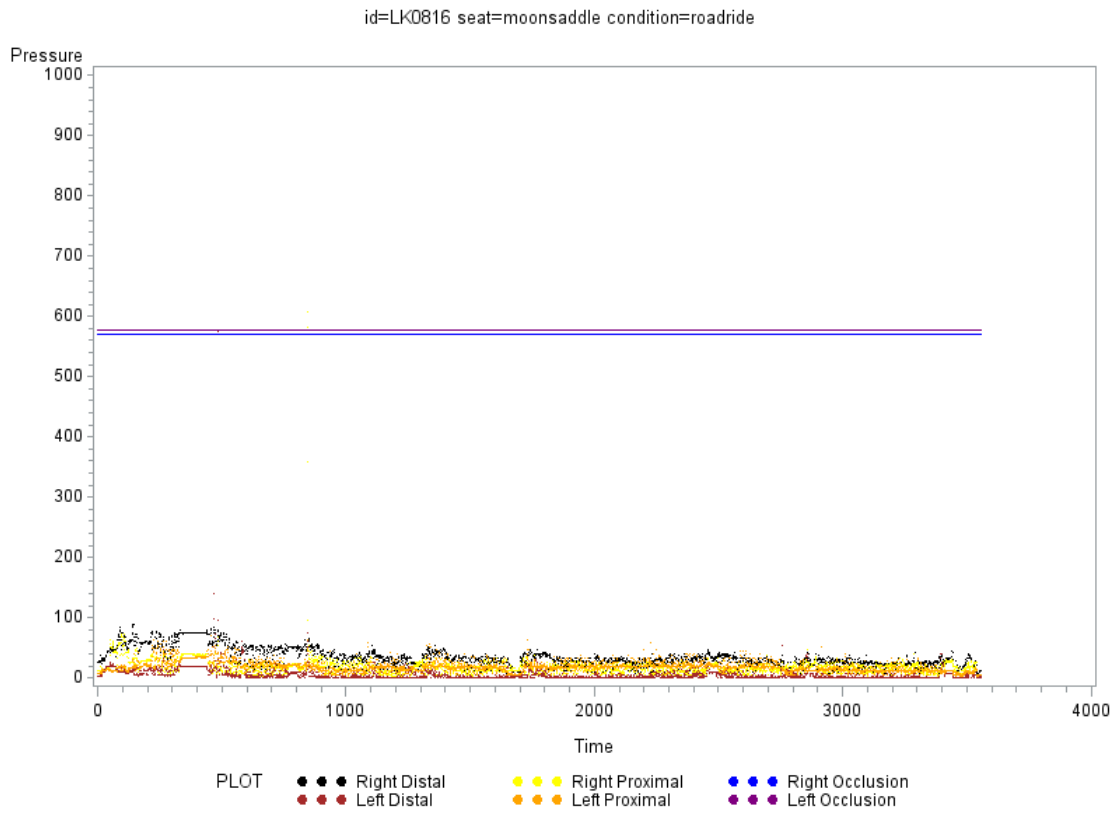

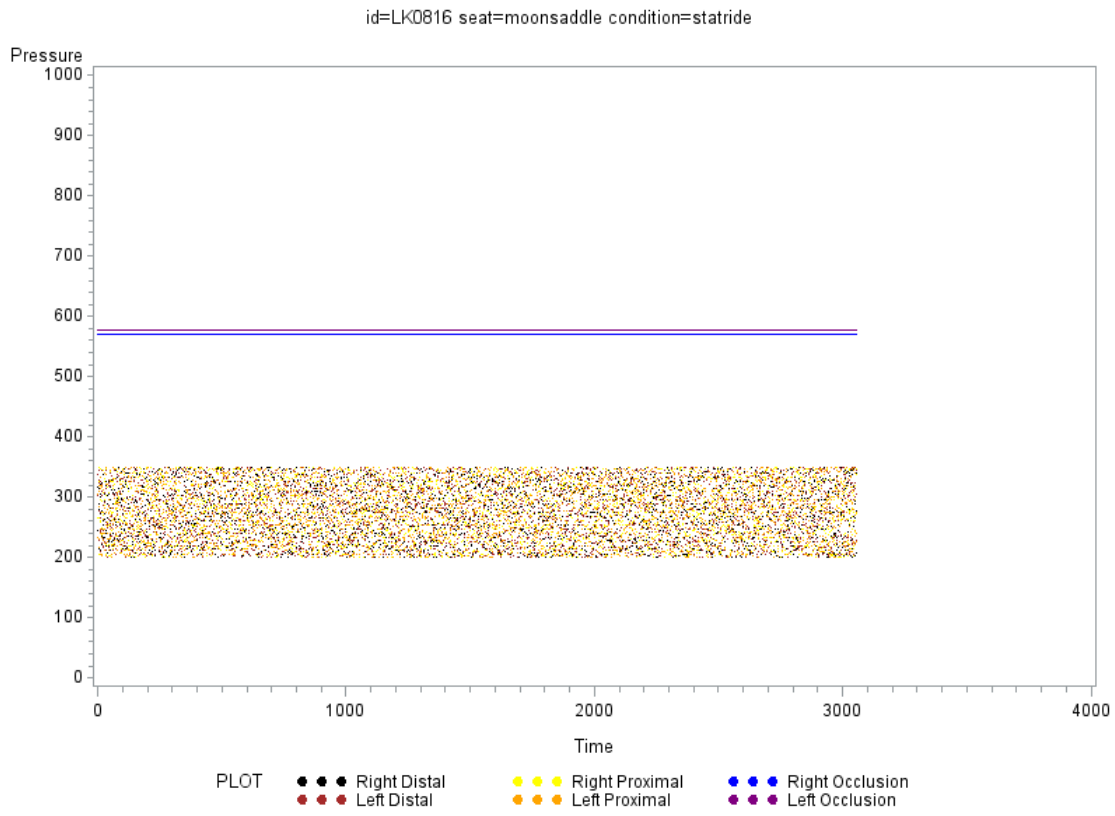

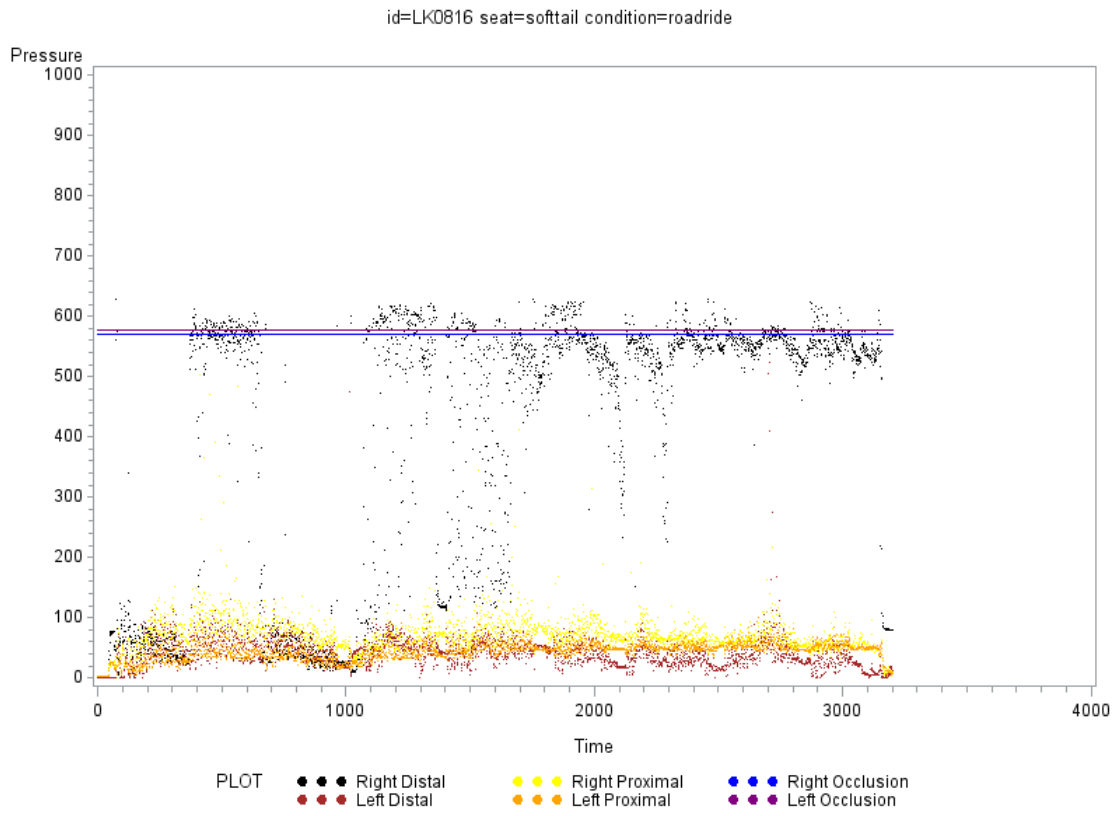

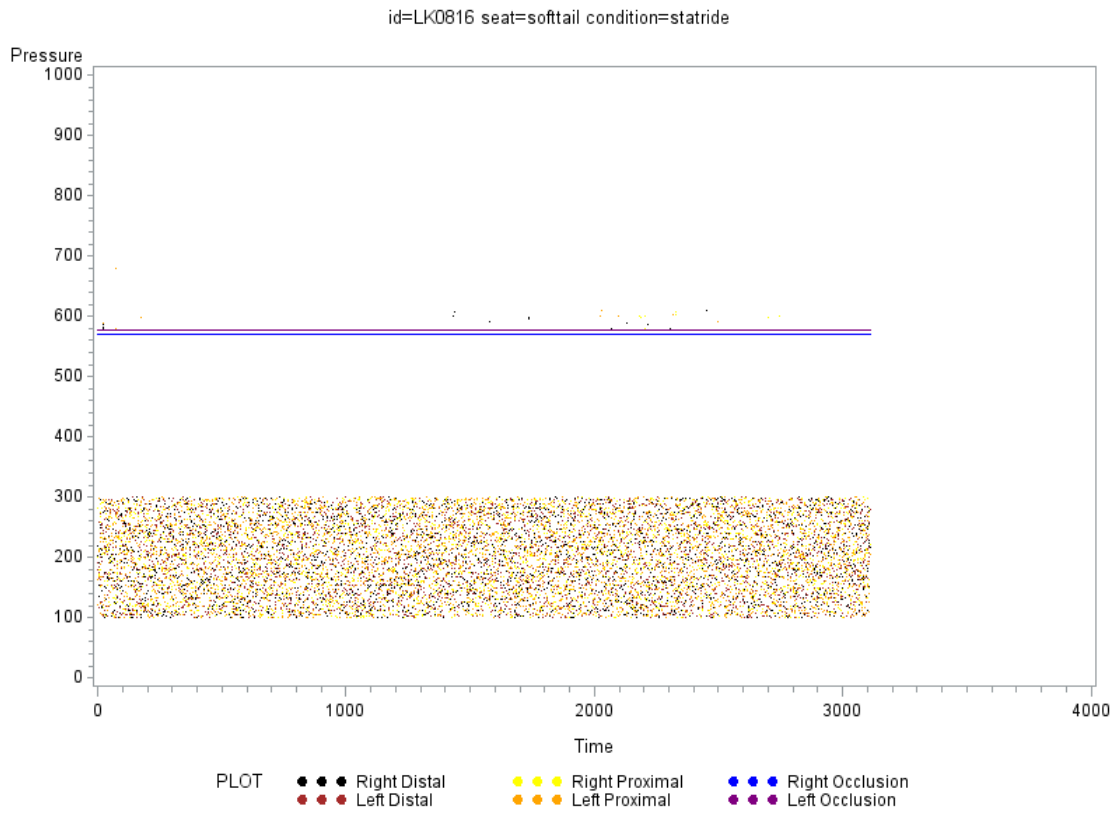

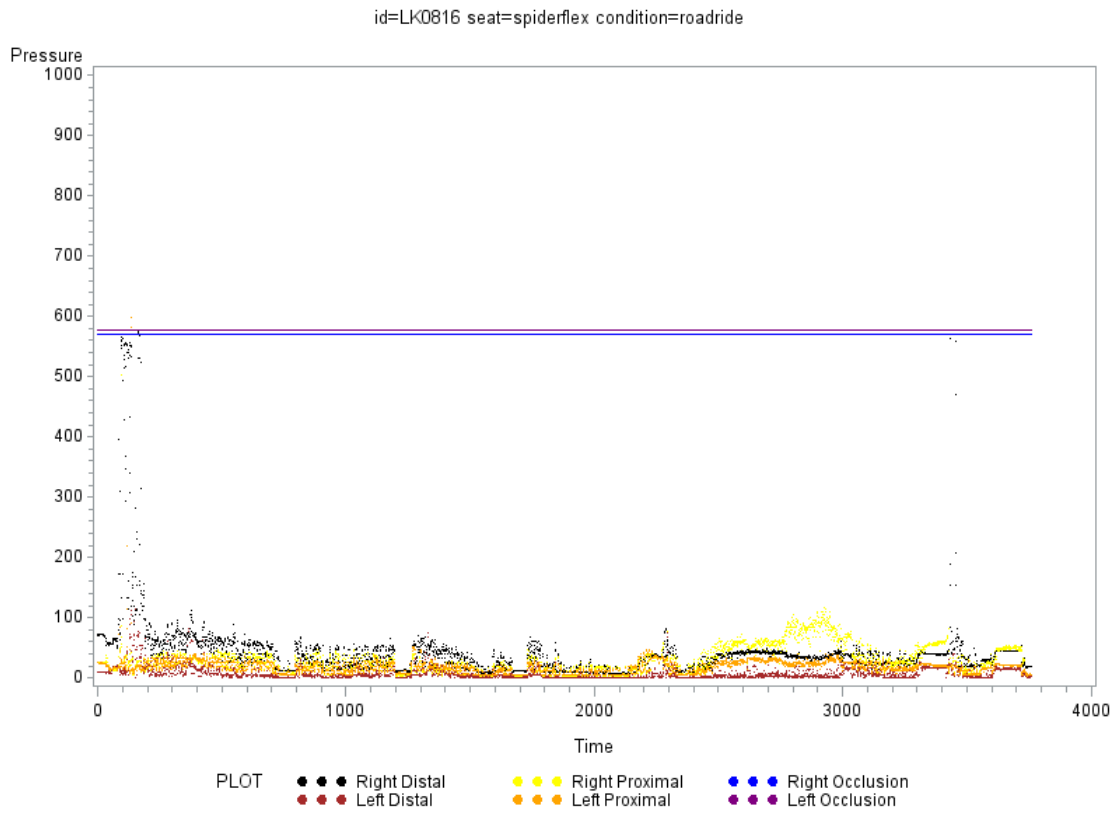

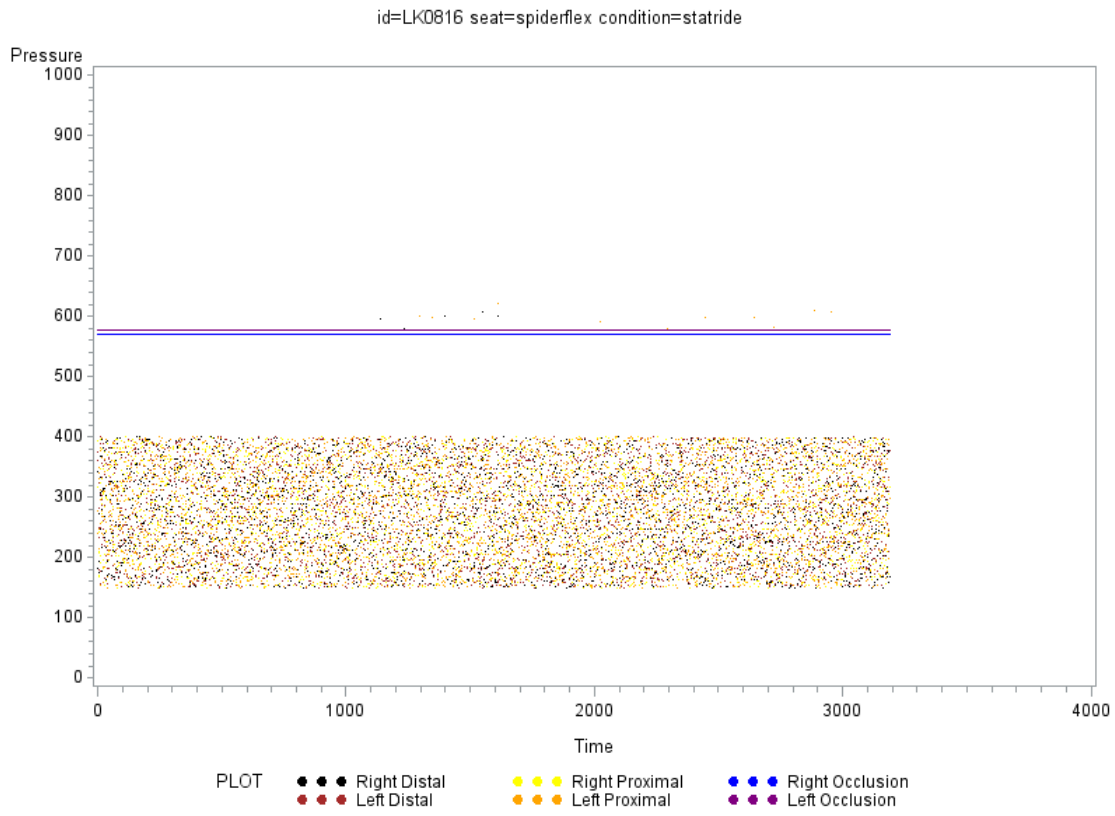



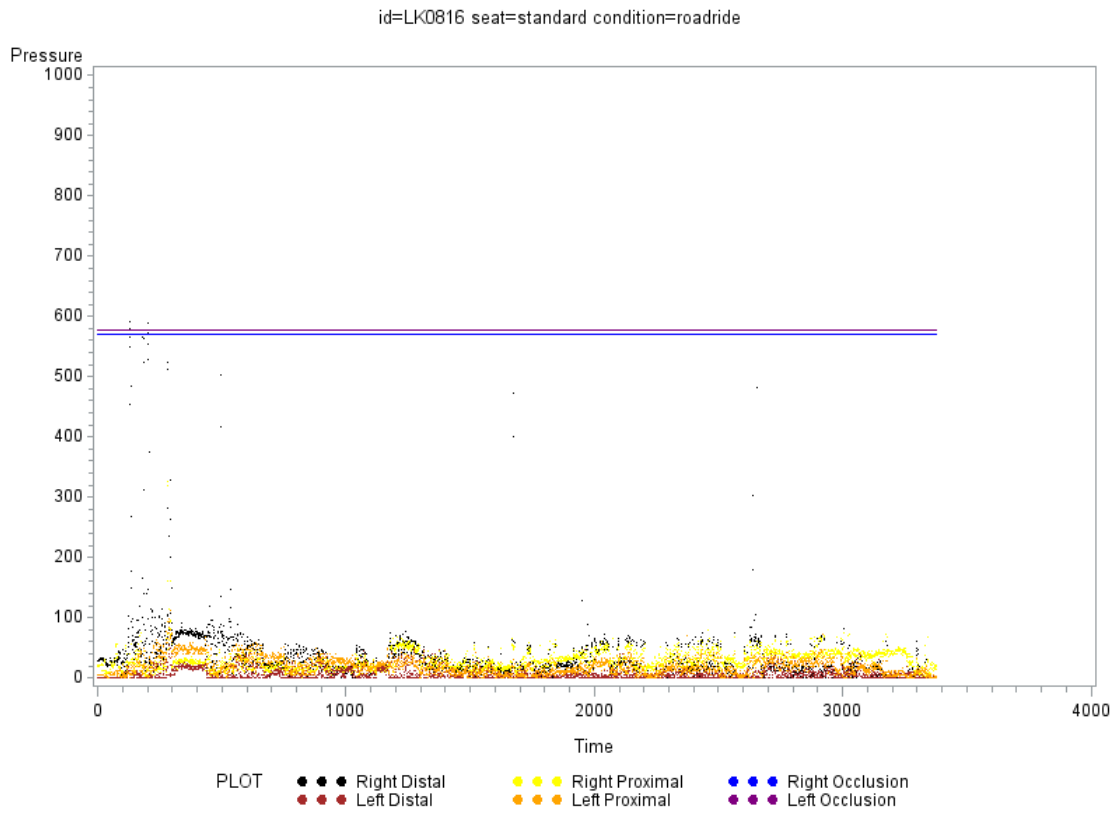

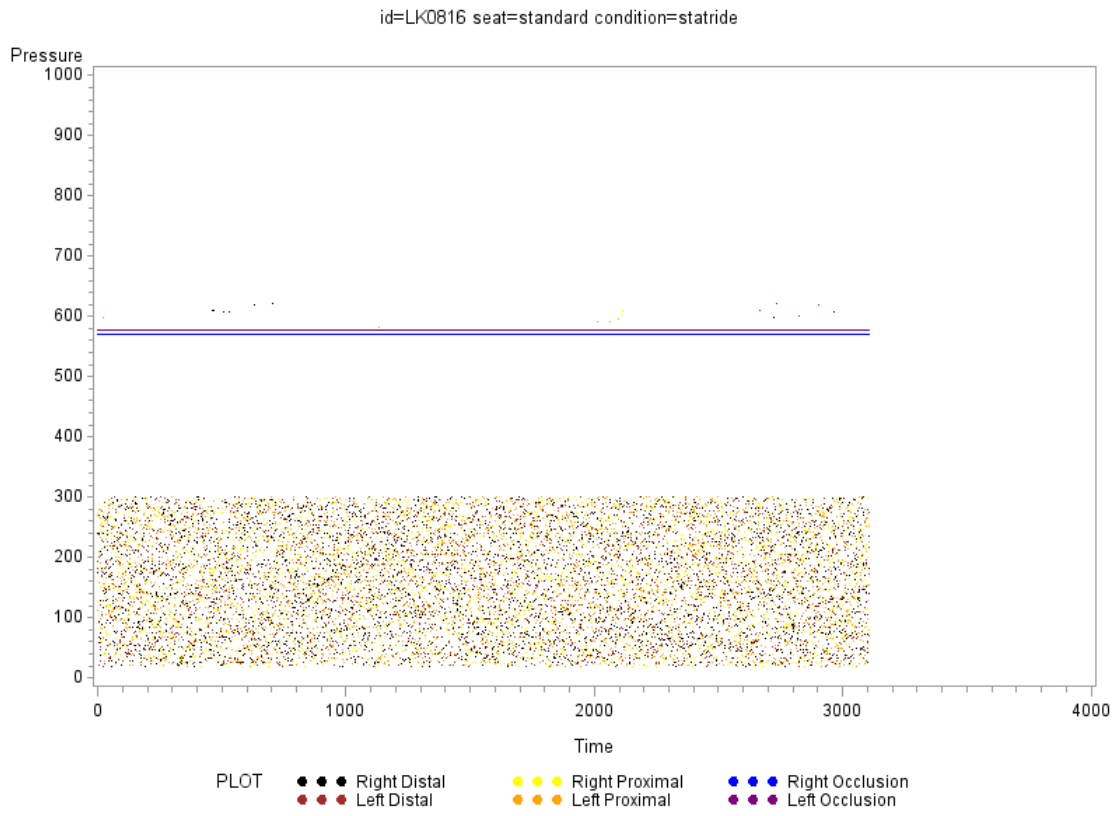

id=LK0816 seat=theseat condition=roadride

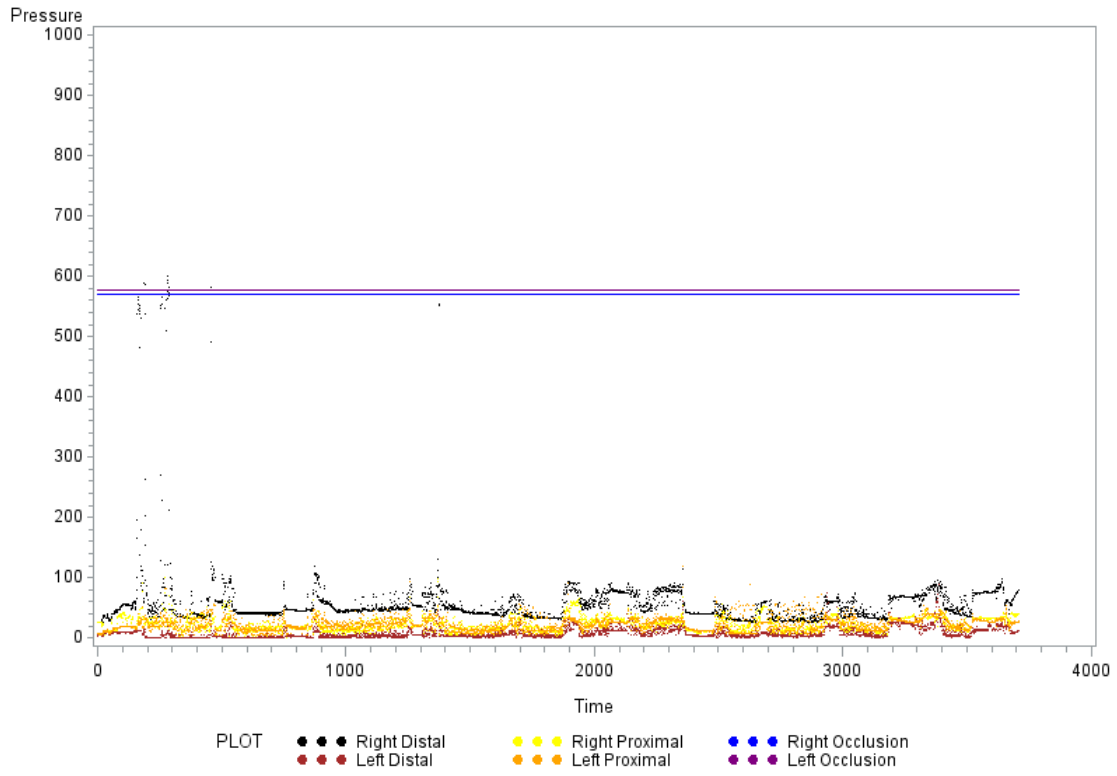

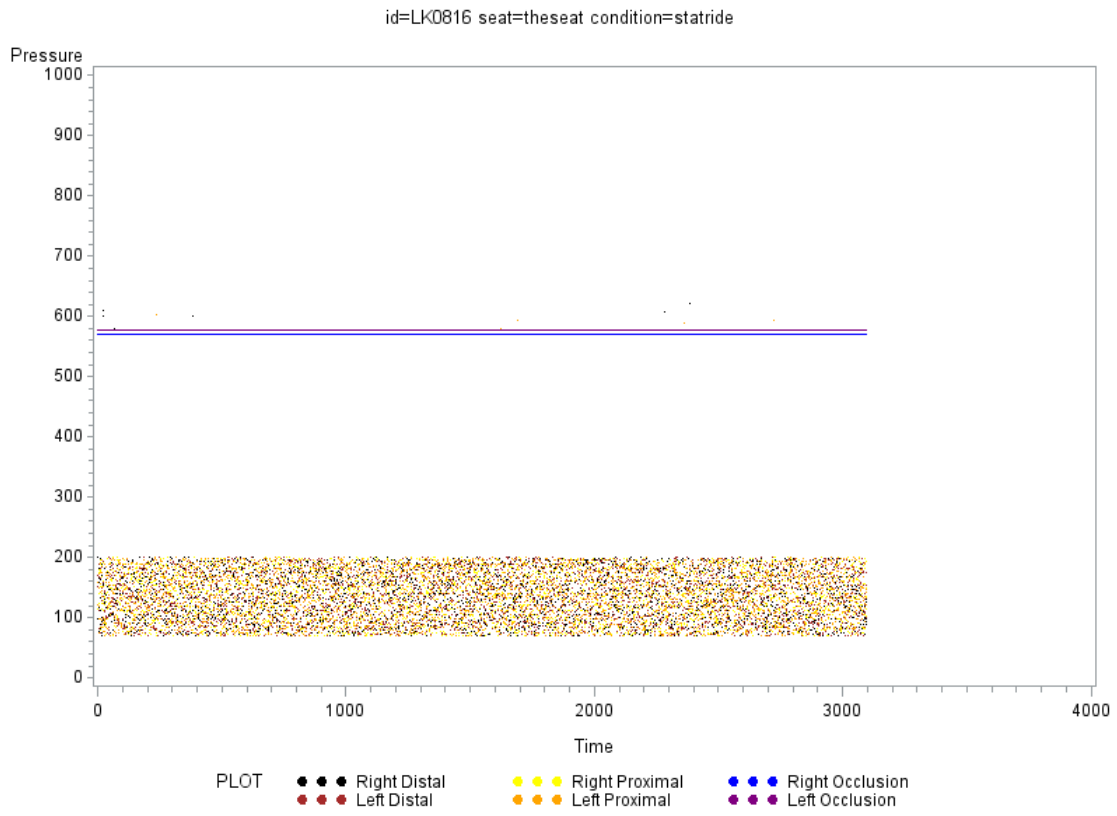

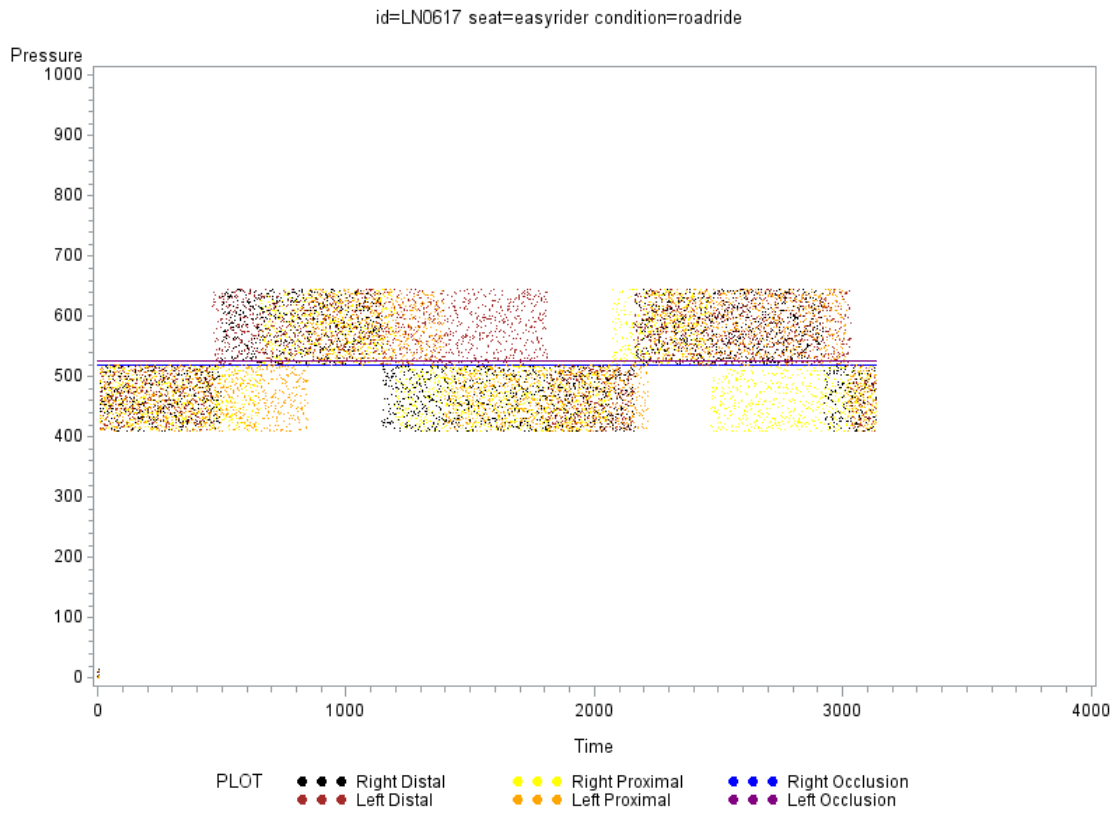

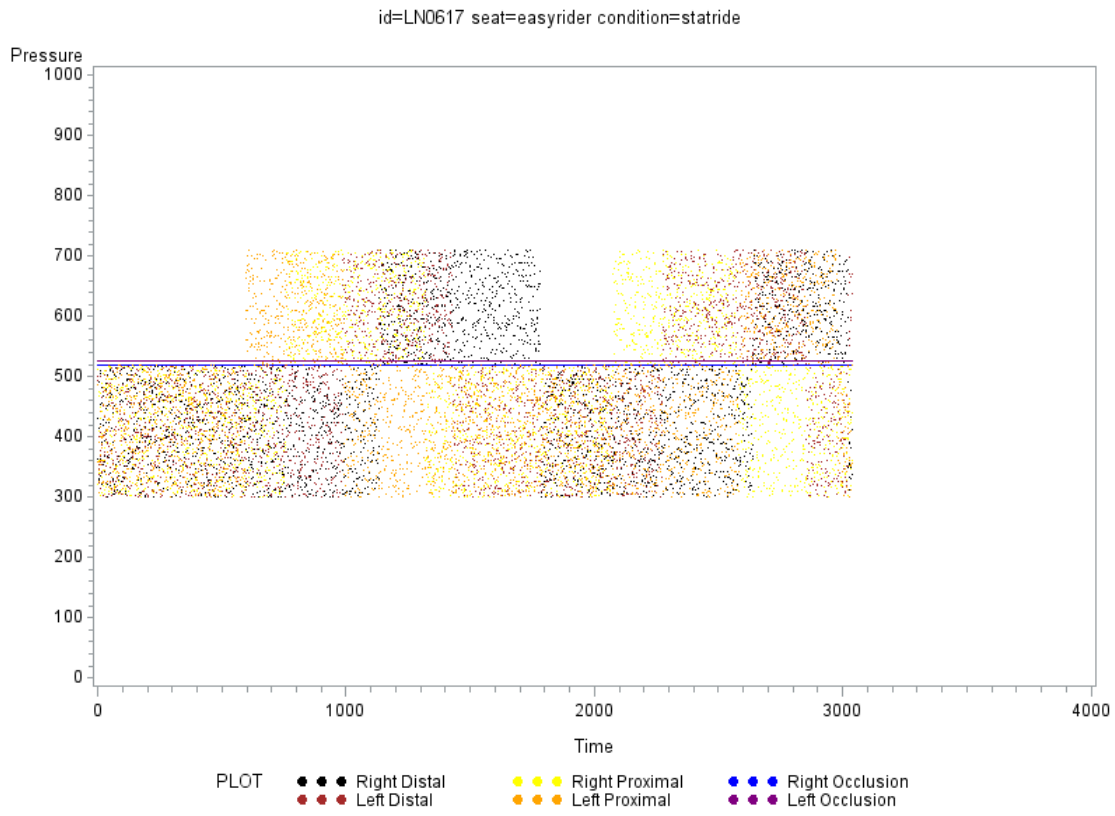

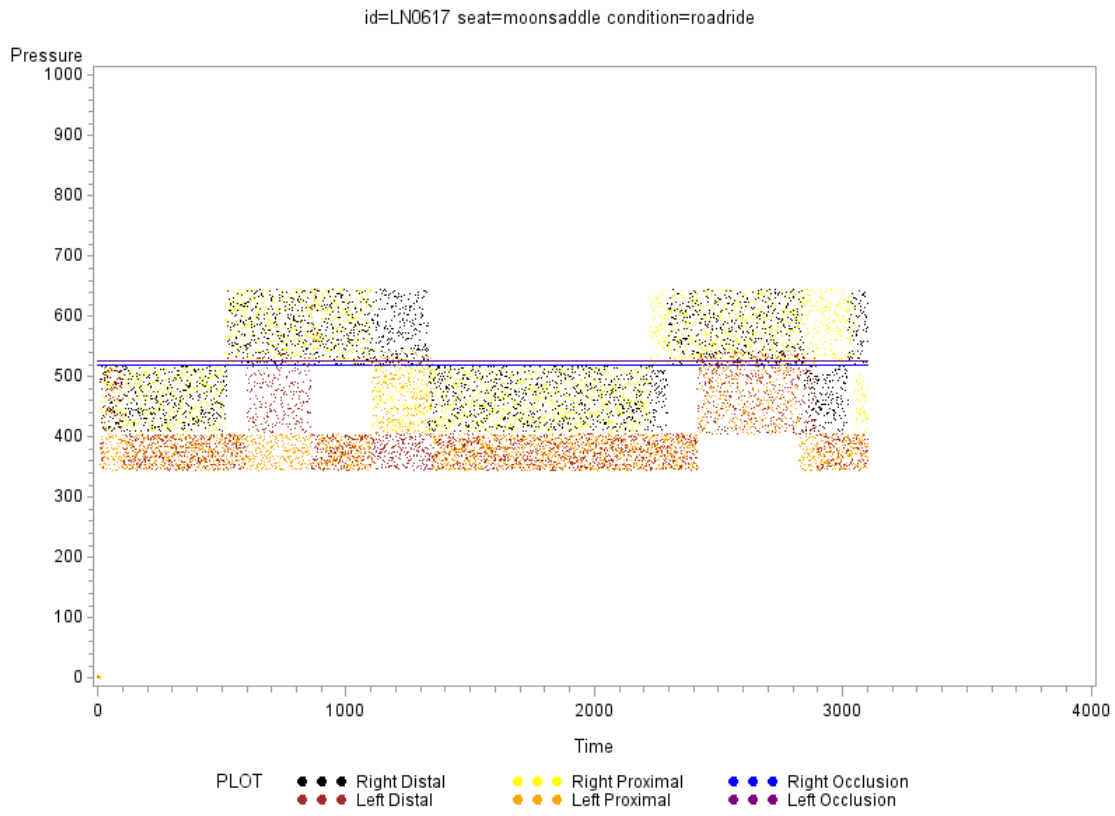

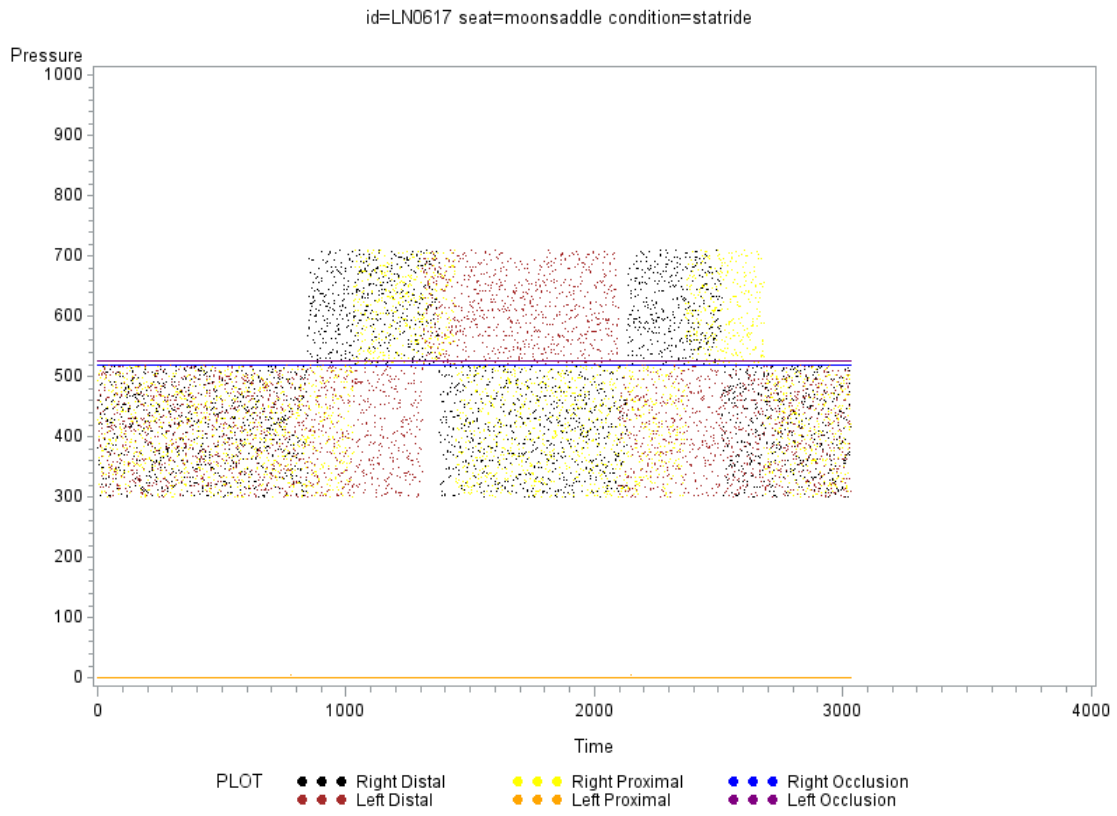



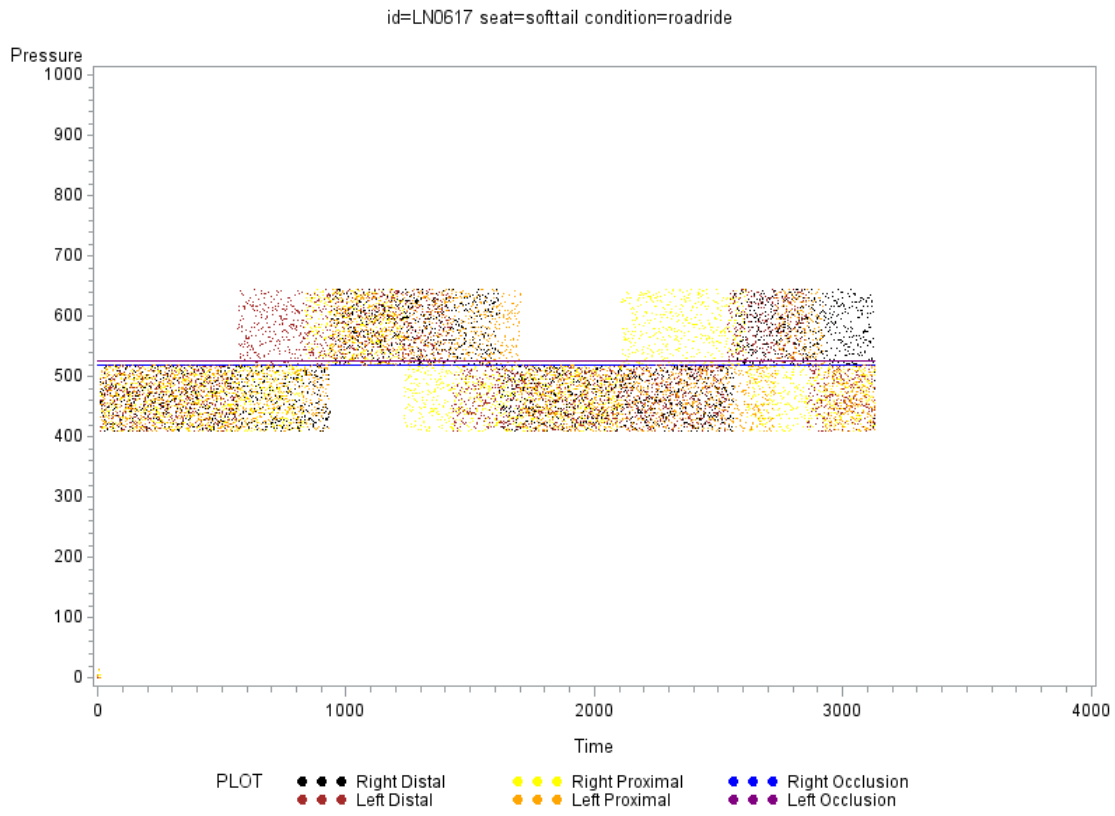

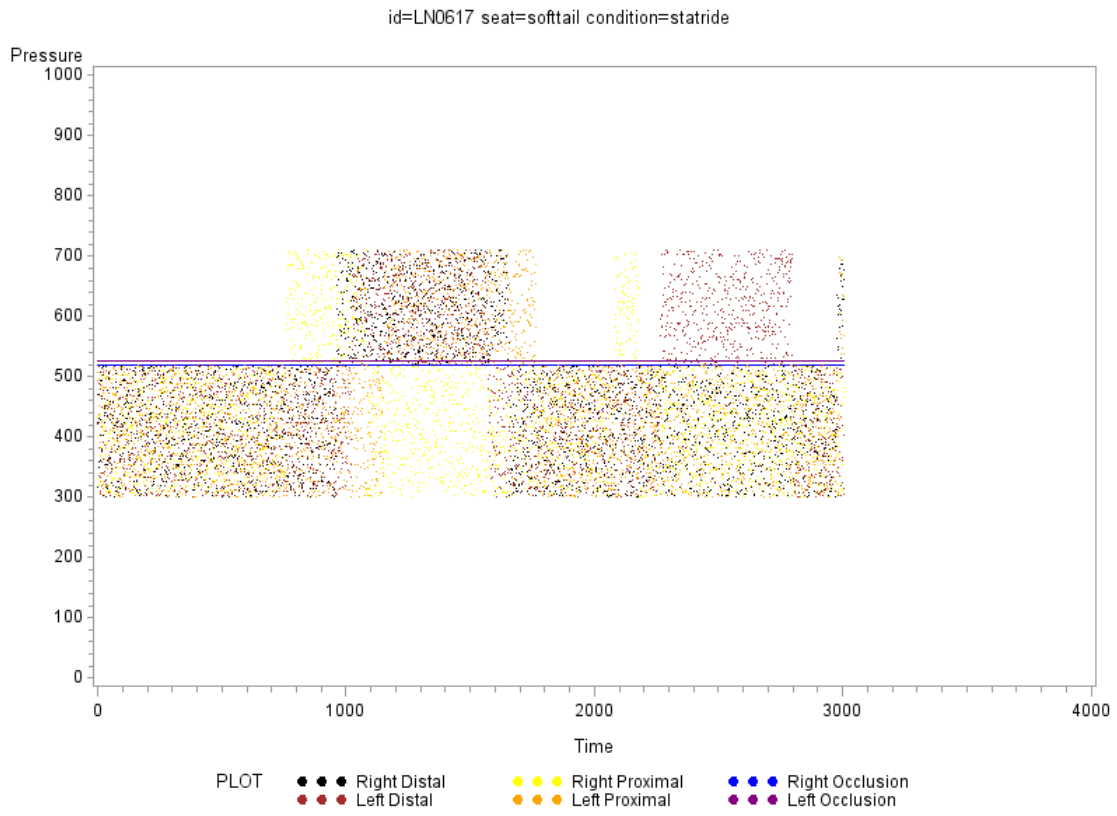

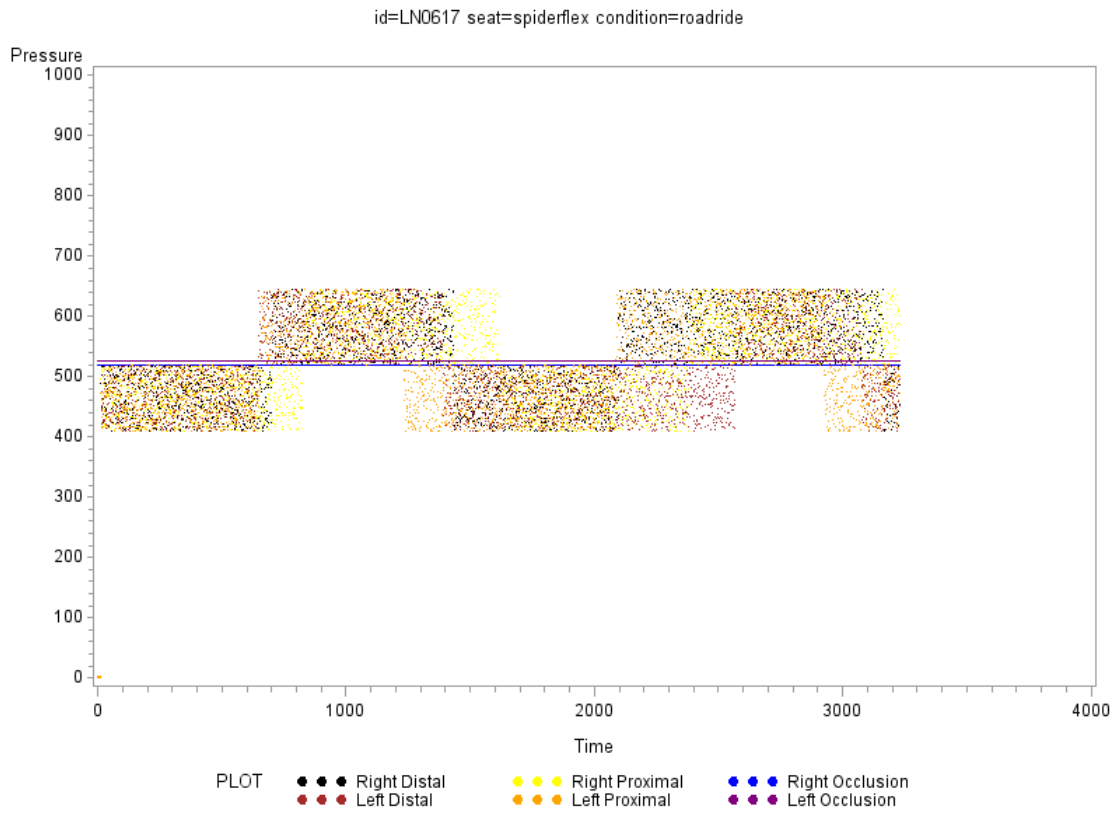

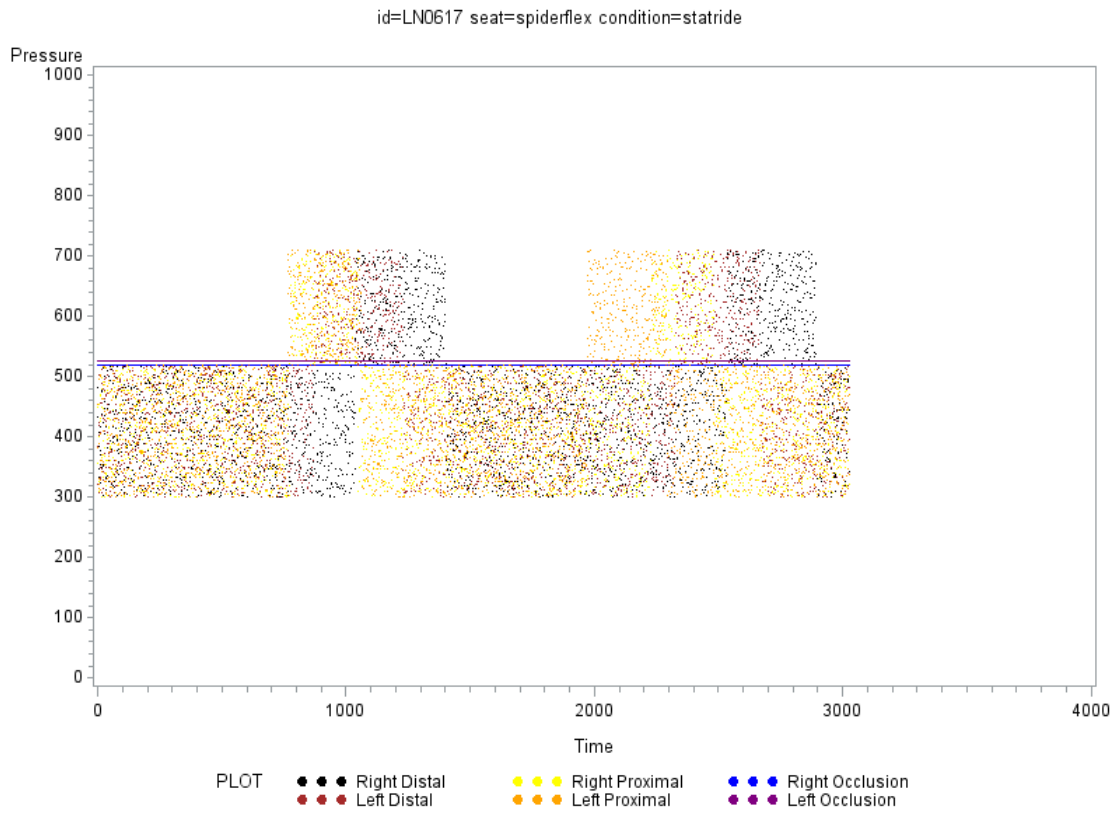

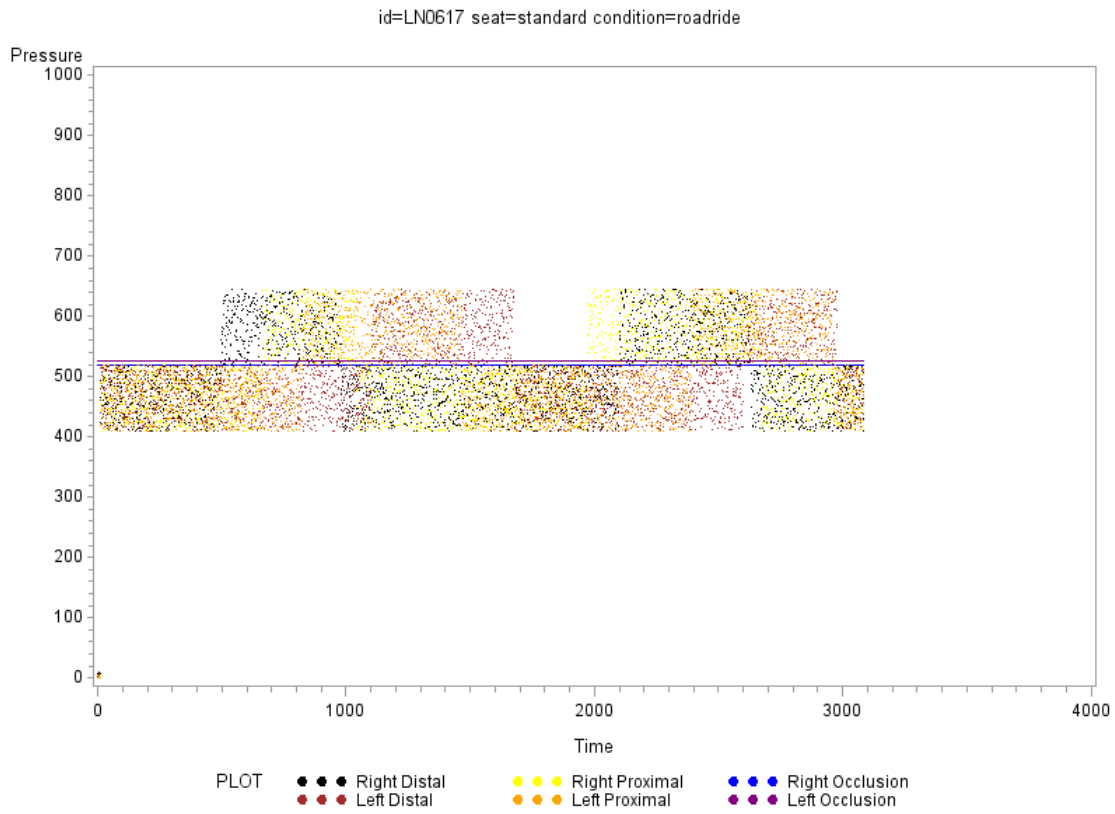

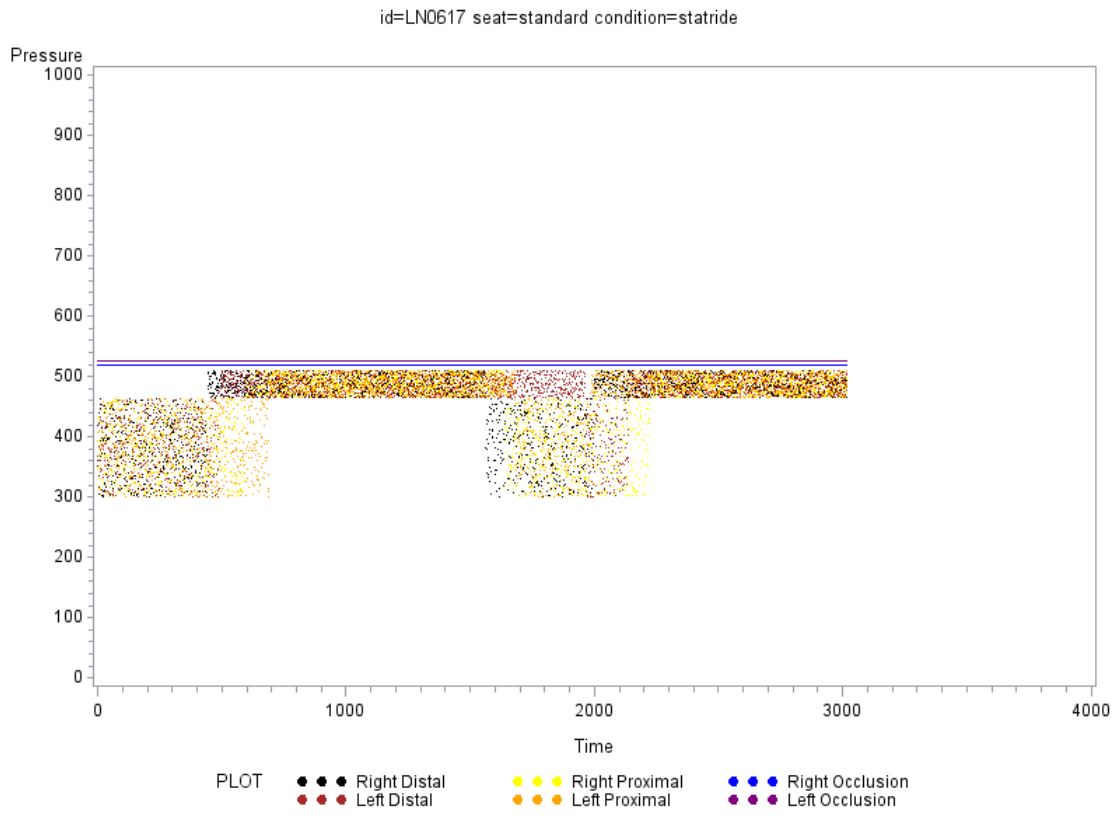

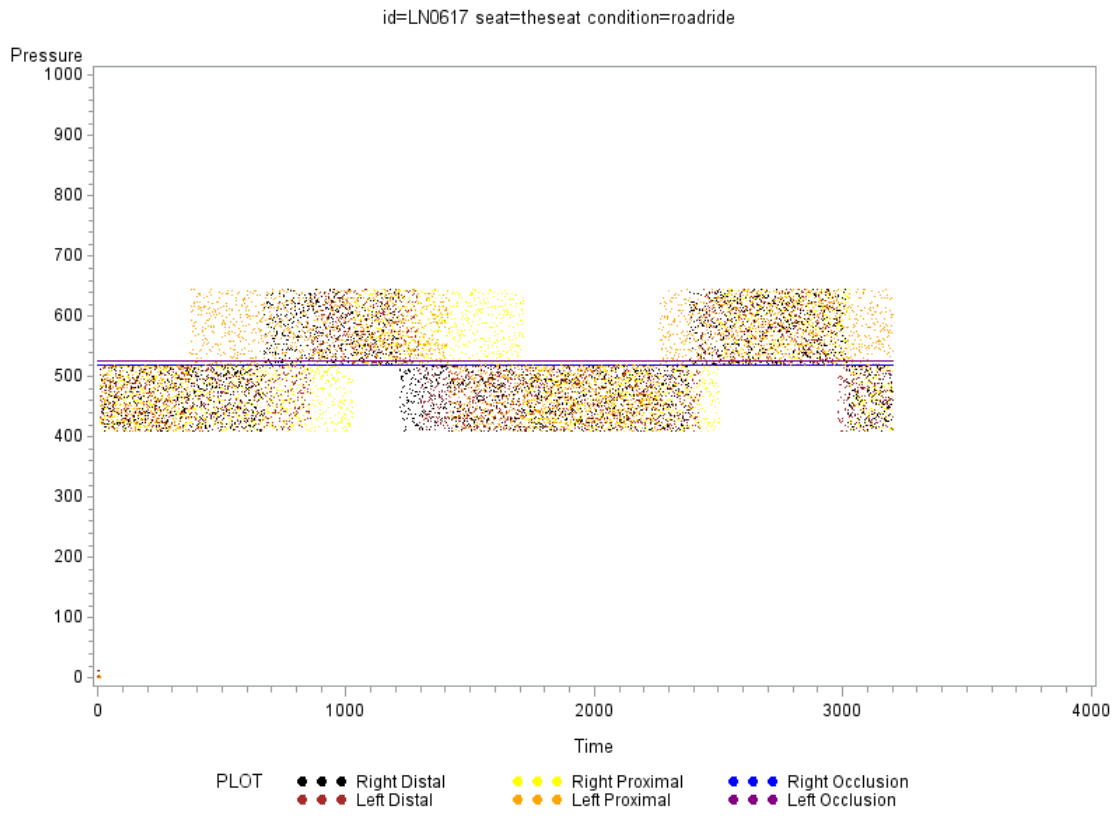

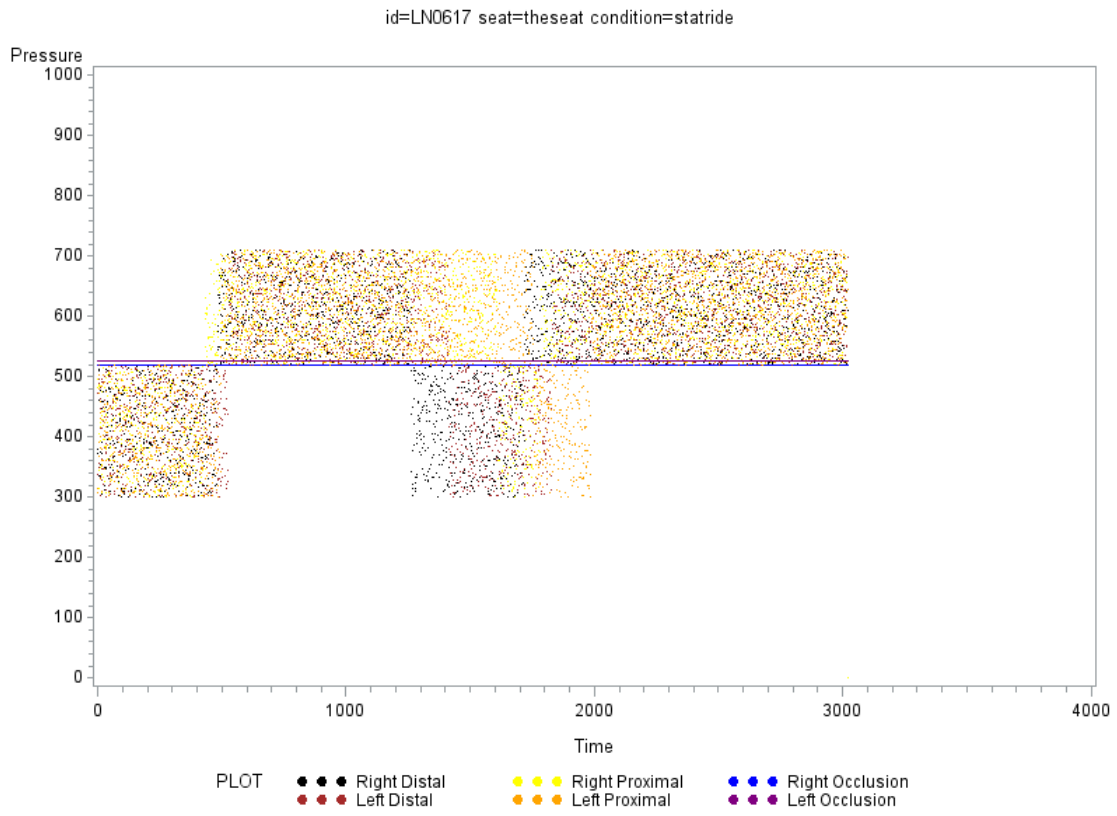



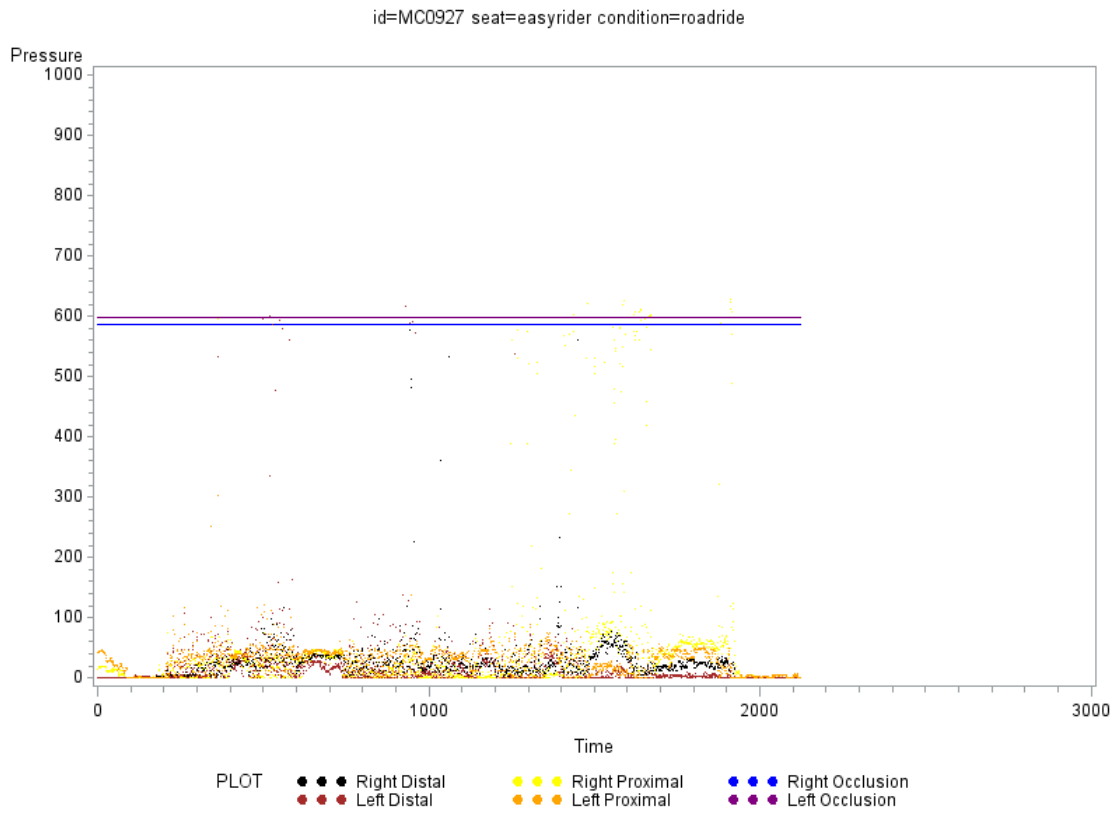

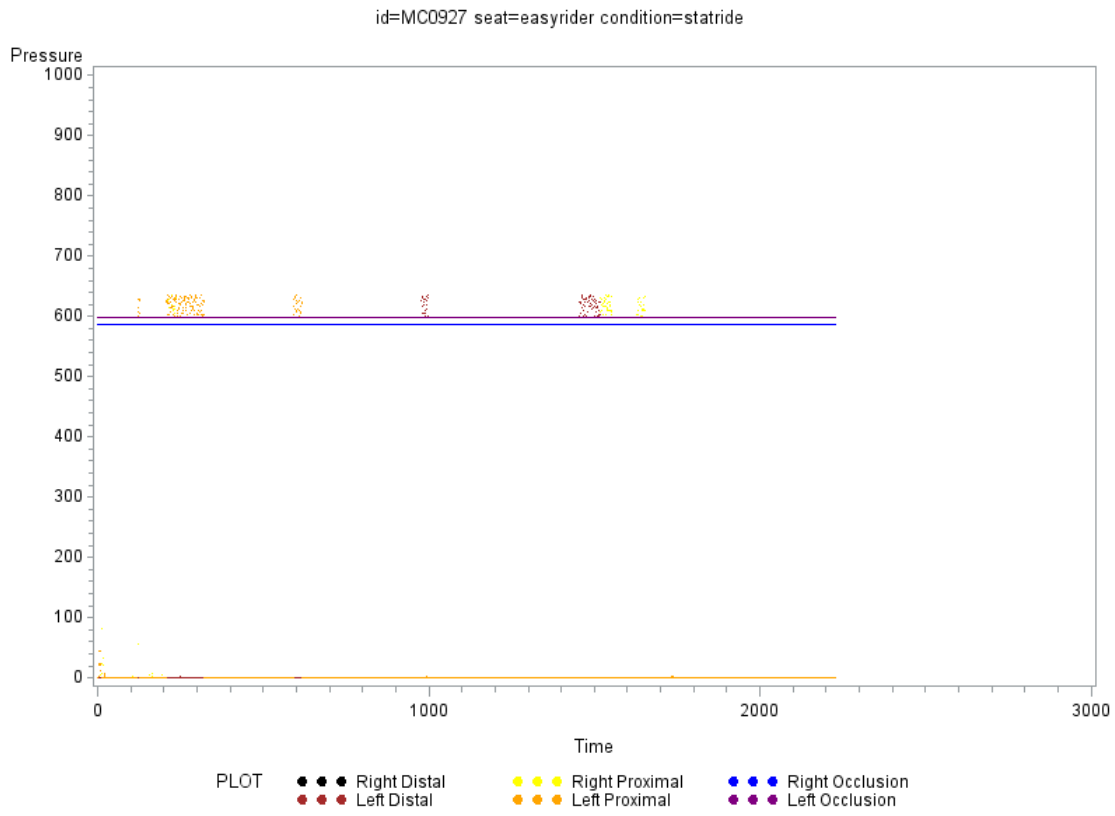

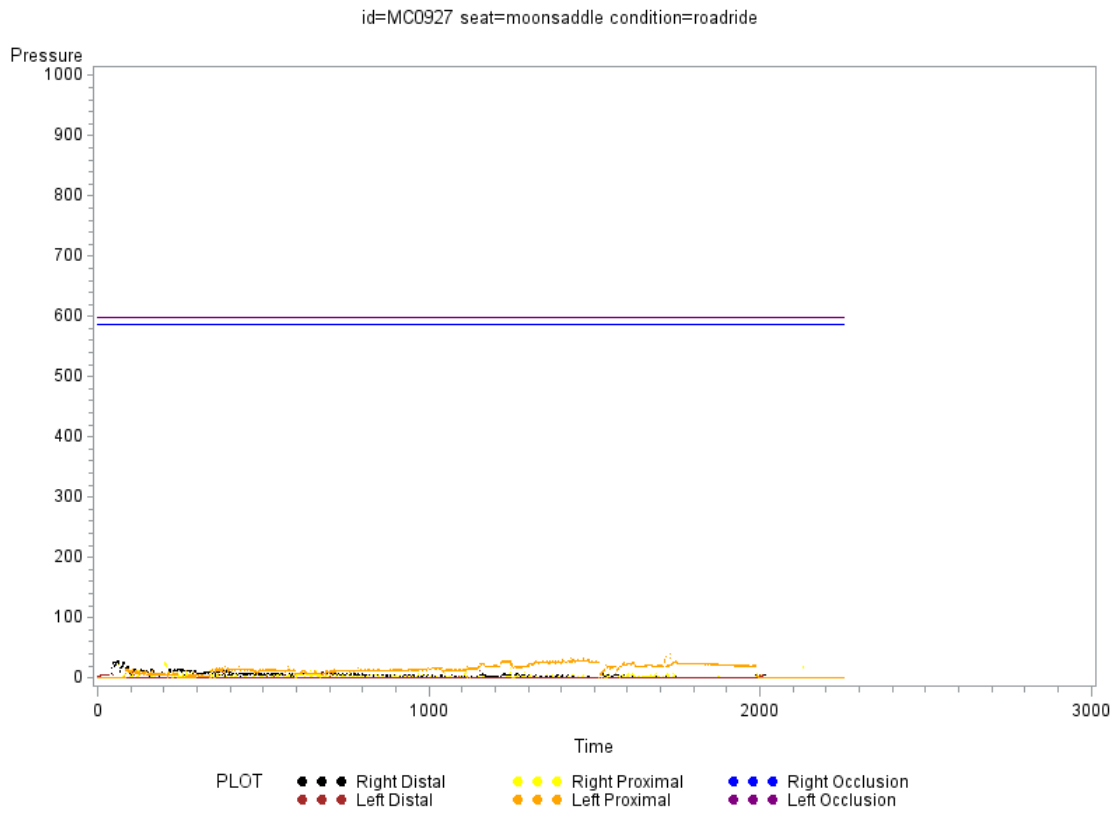

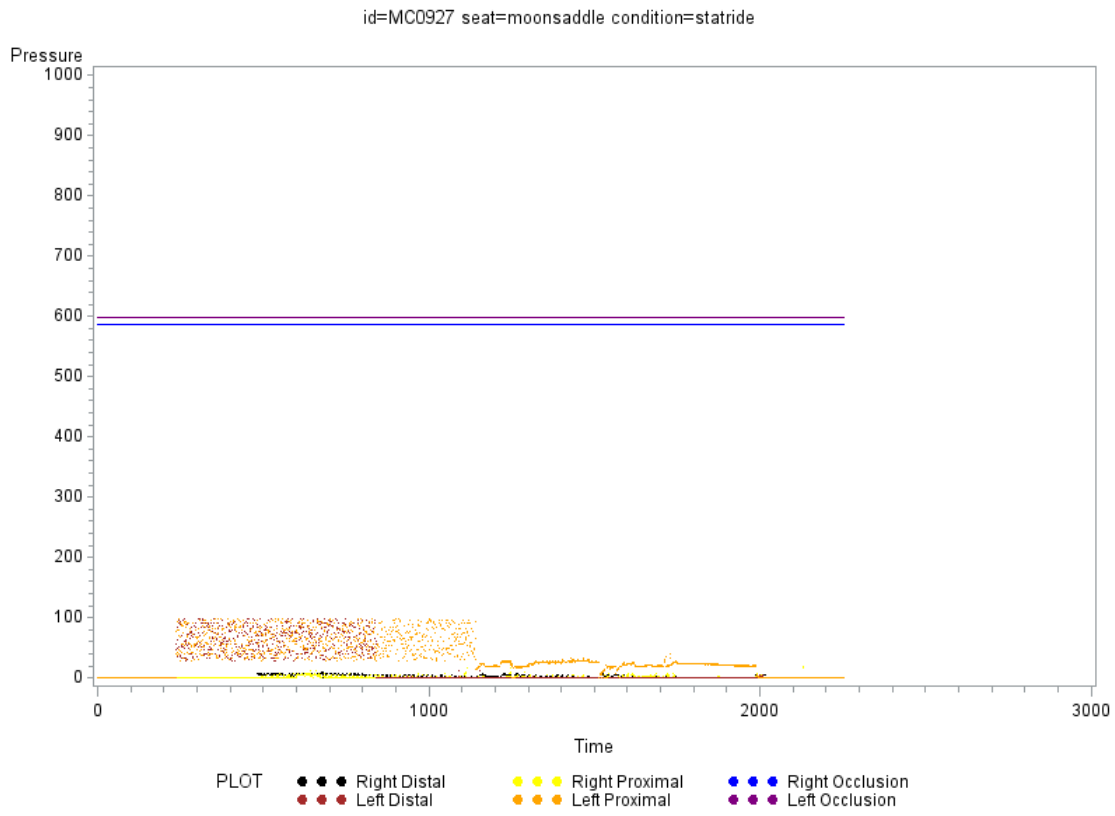

id=MC0927 seat=softtail condition=roadride

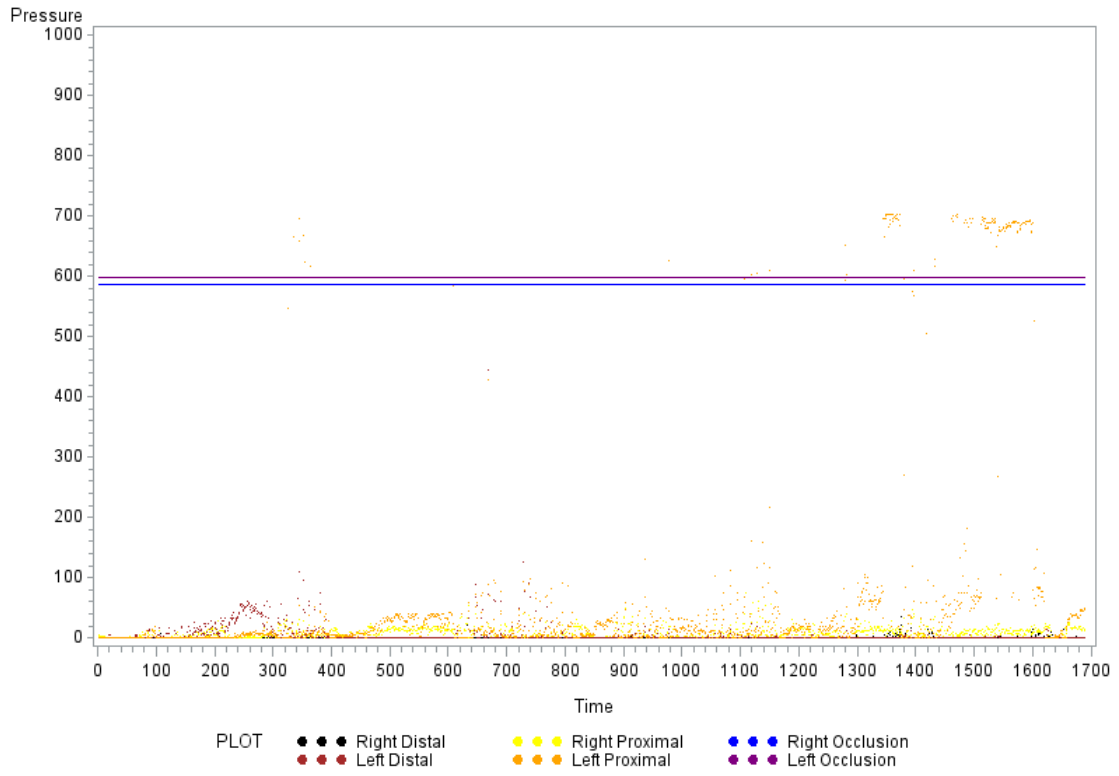

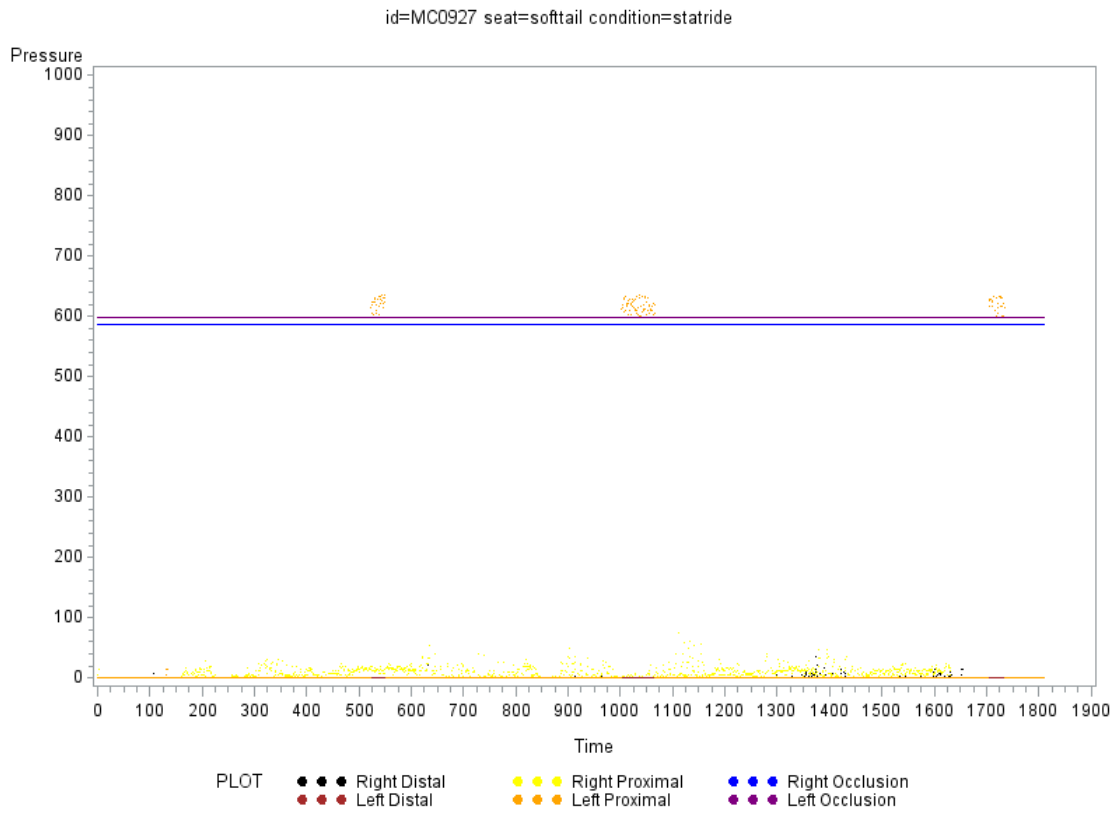

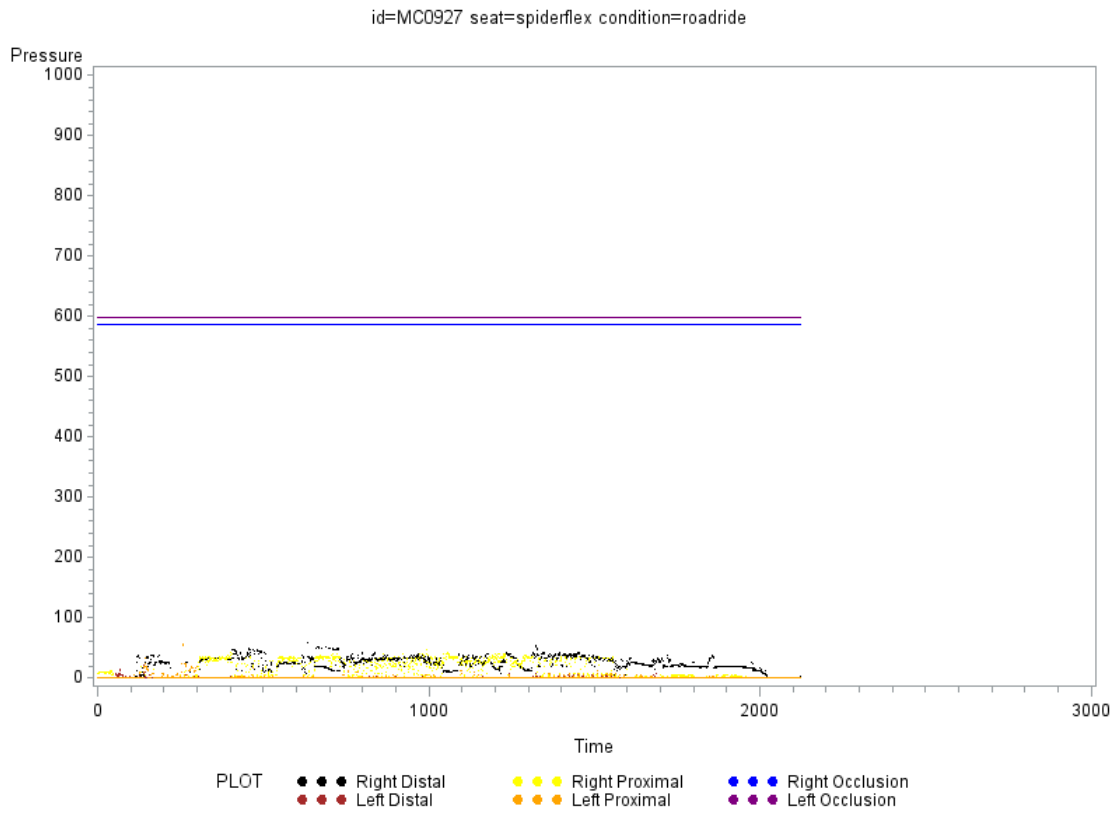

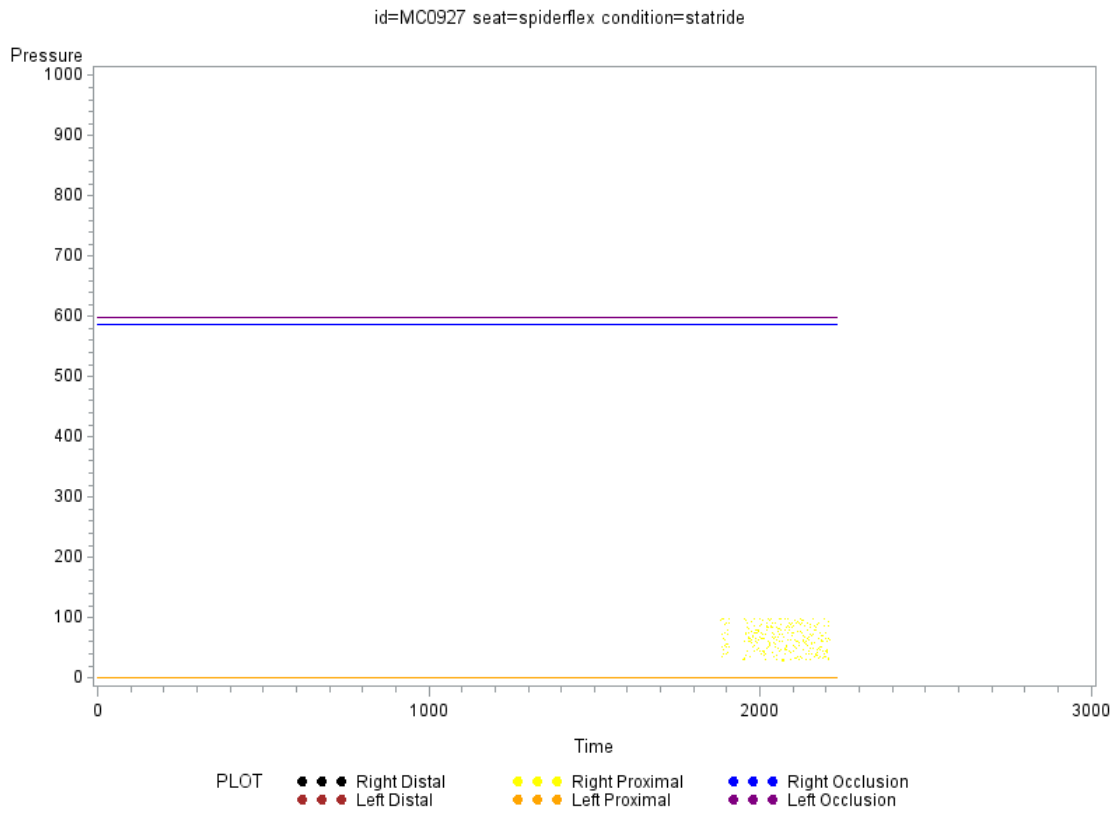



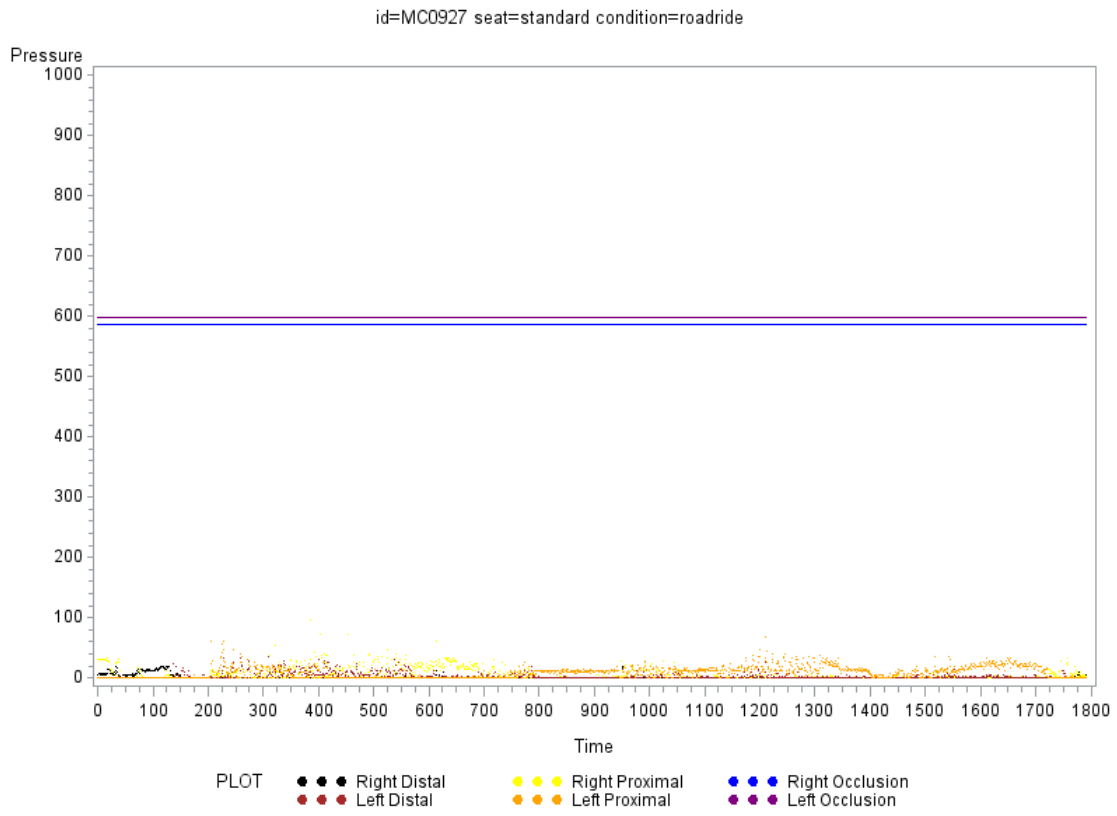

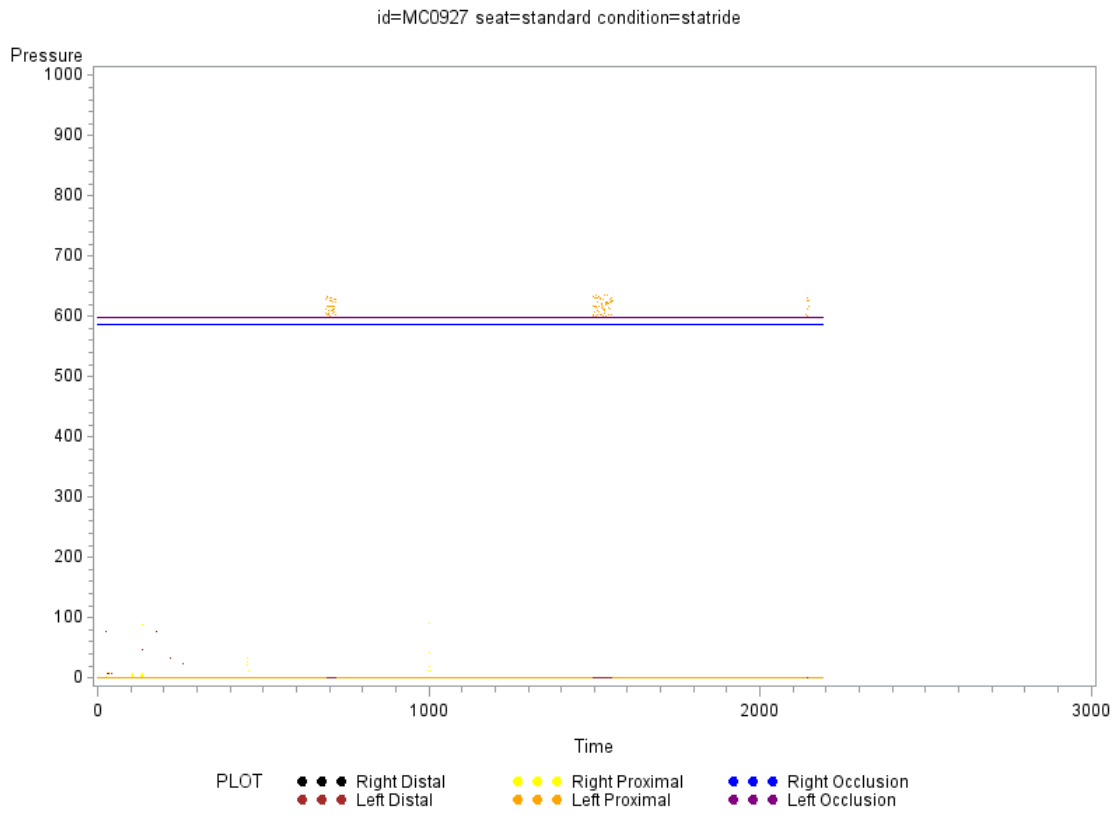

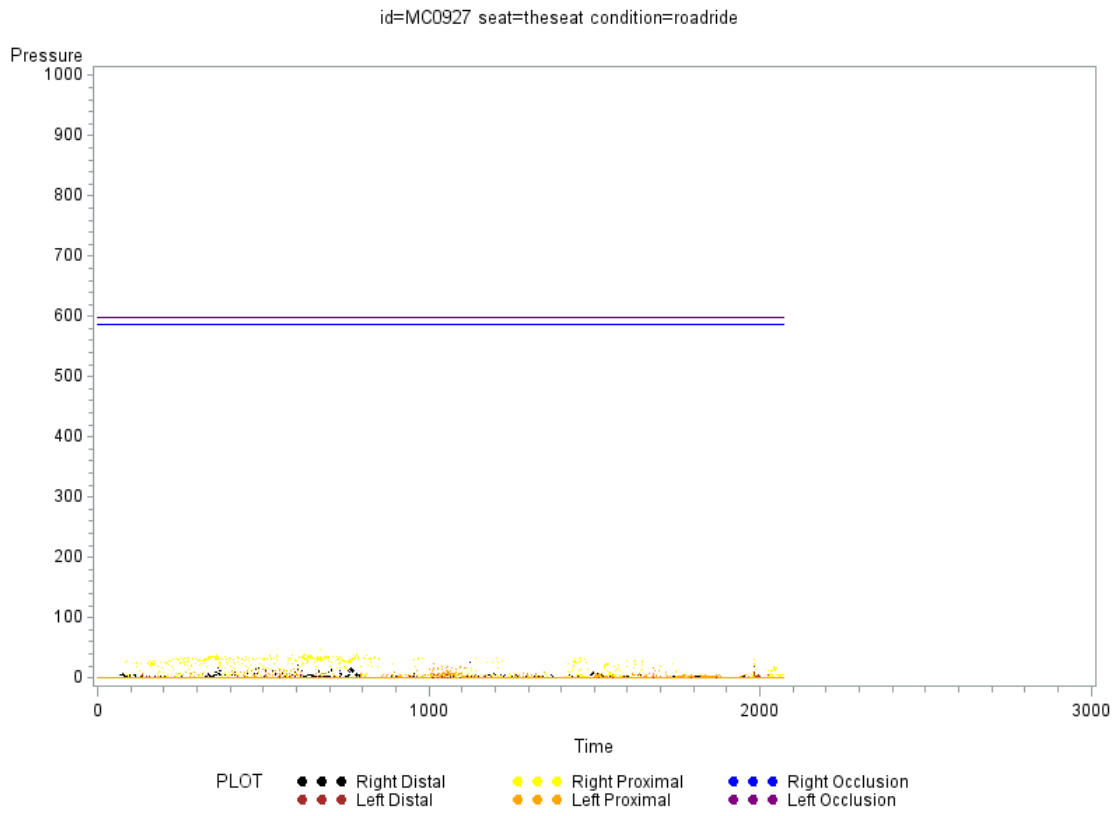

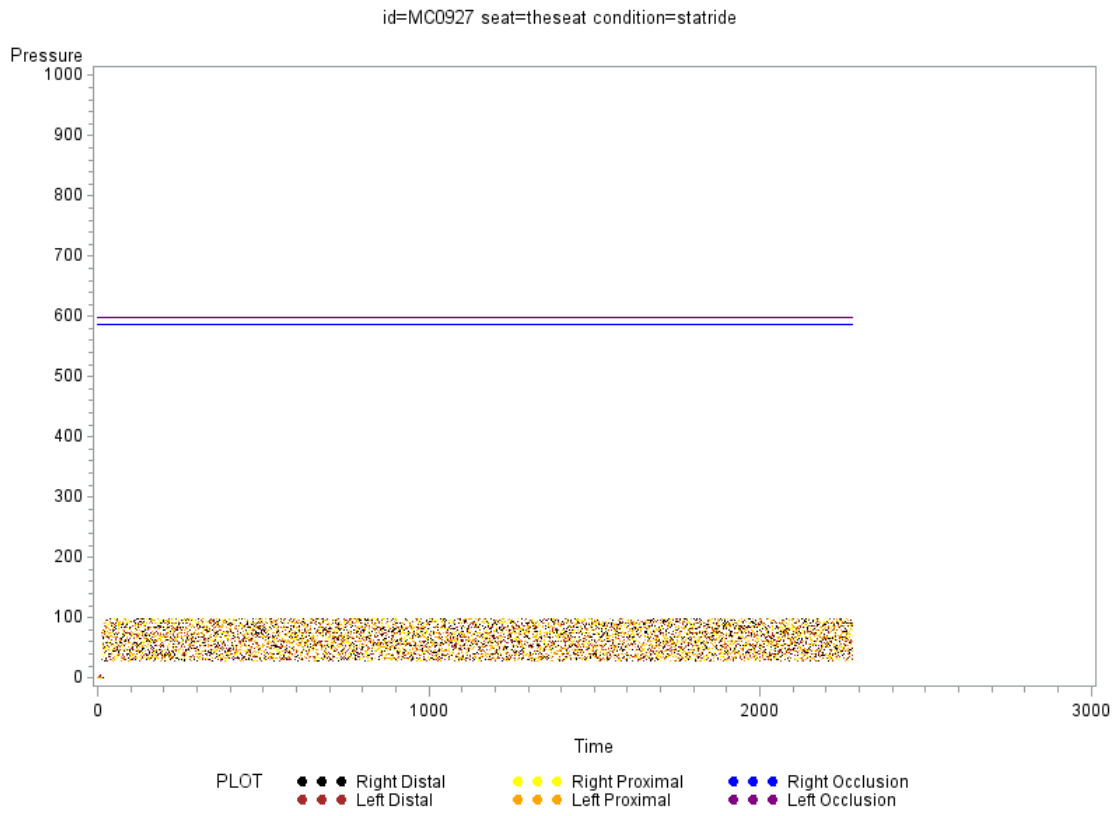

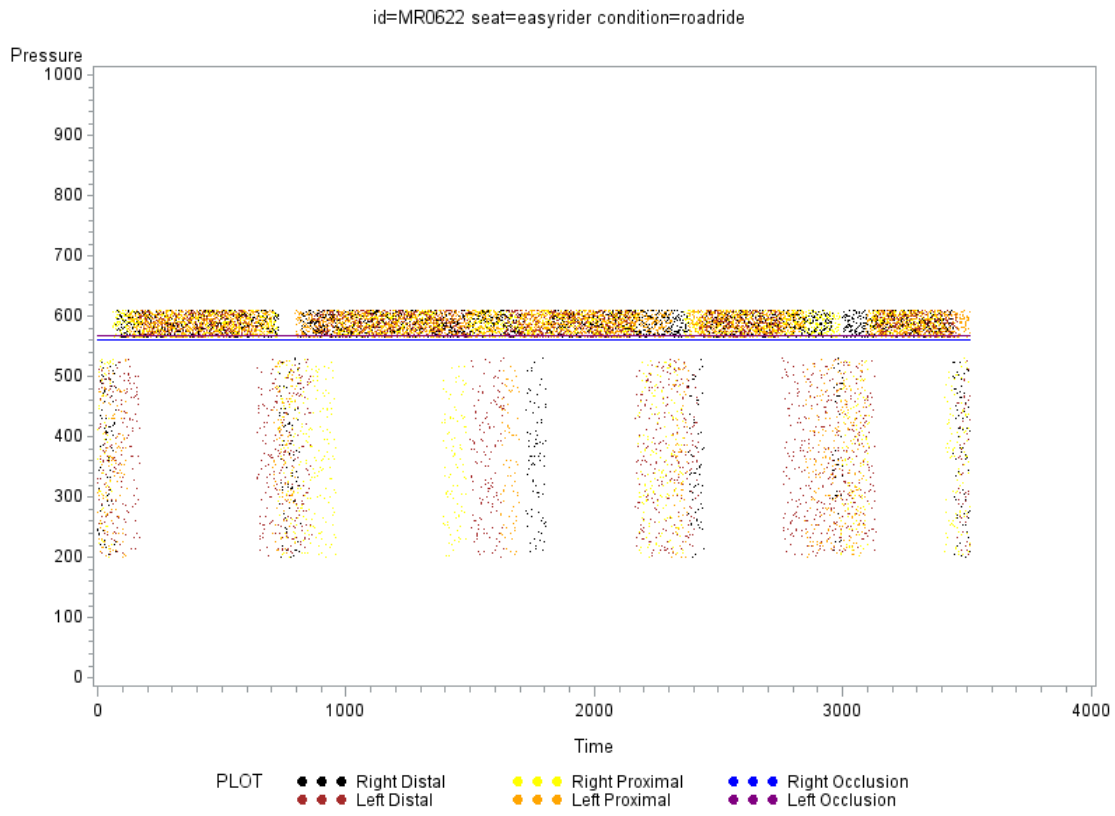

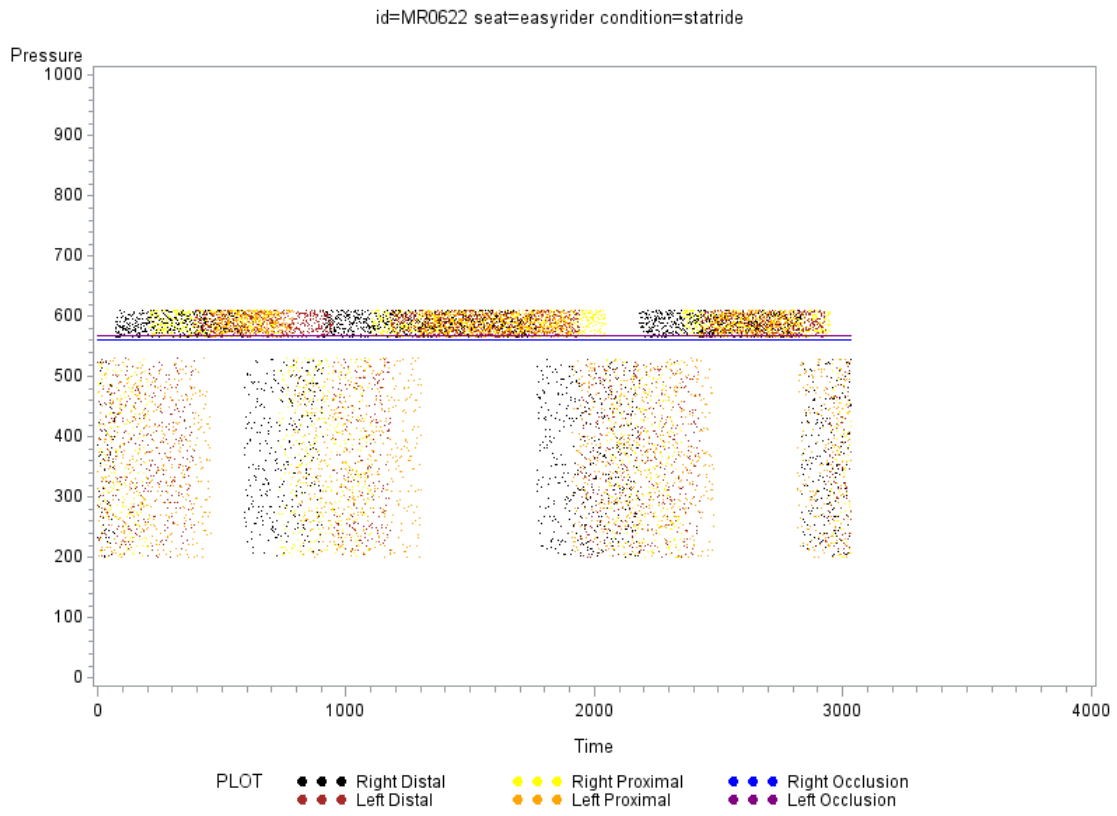

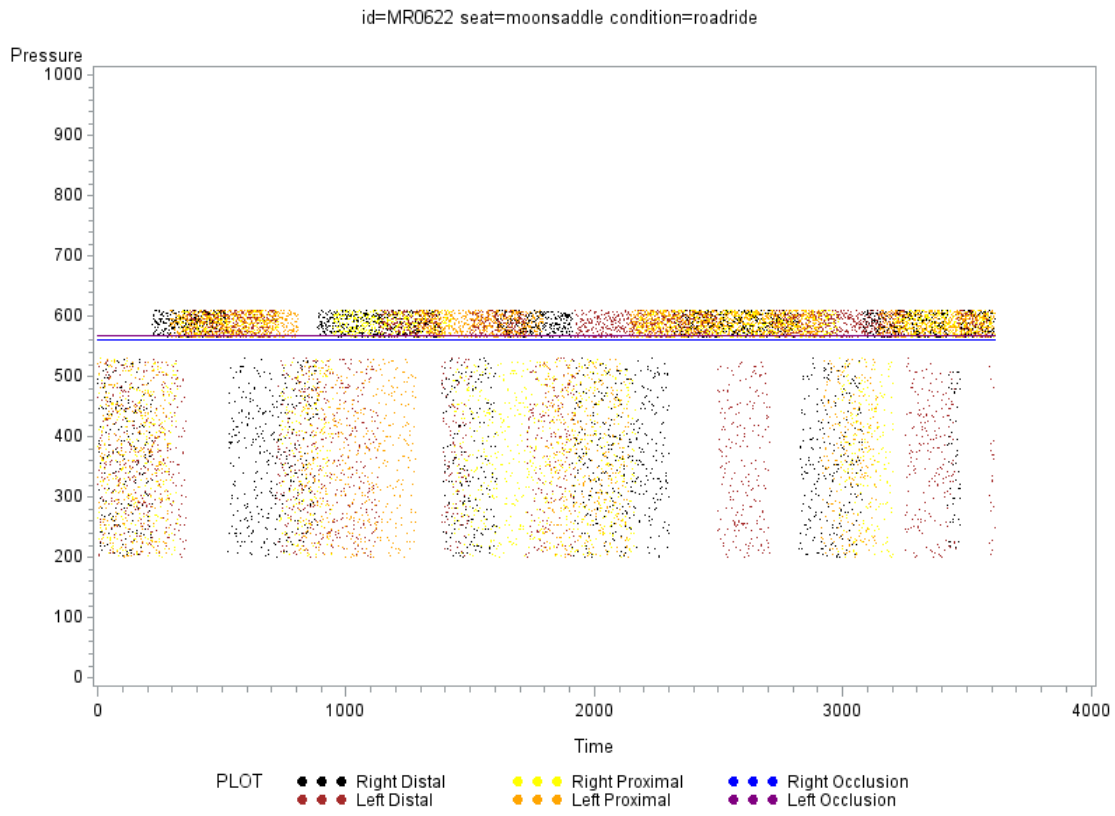

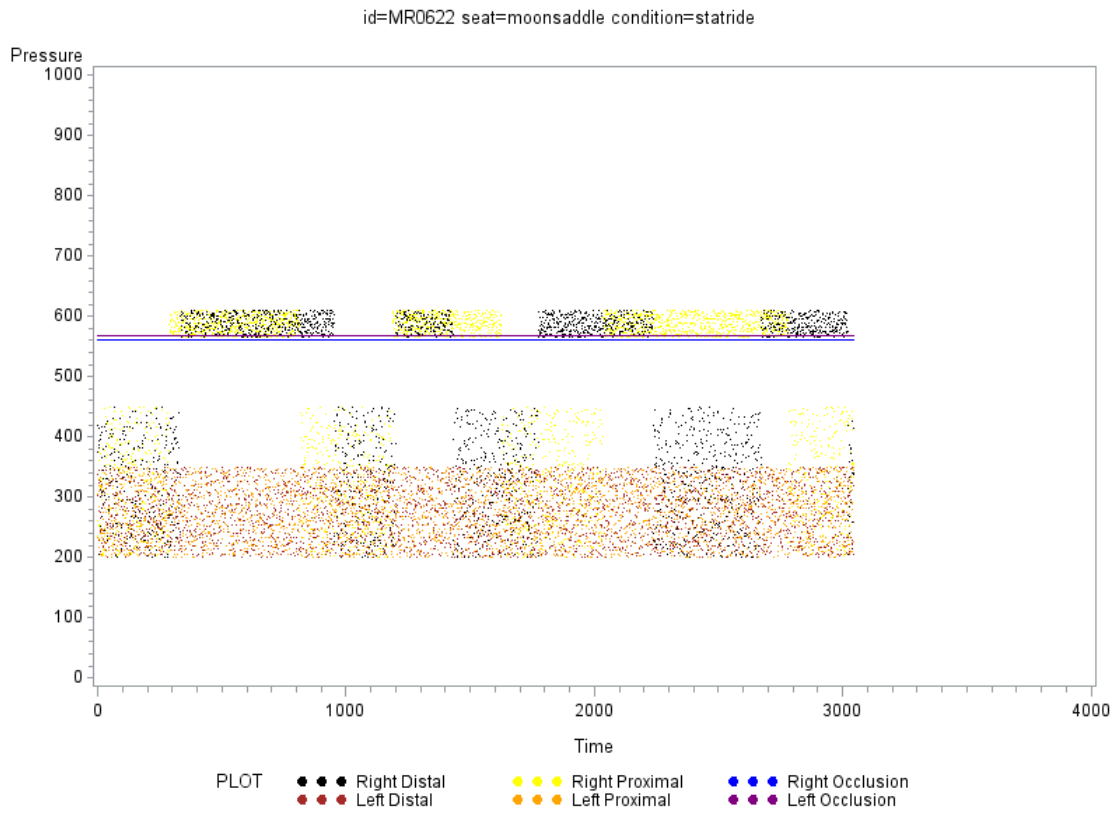



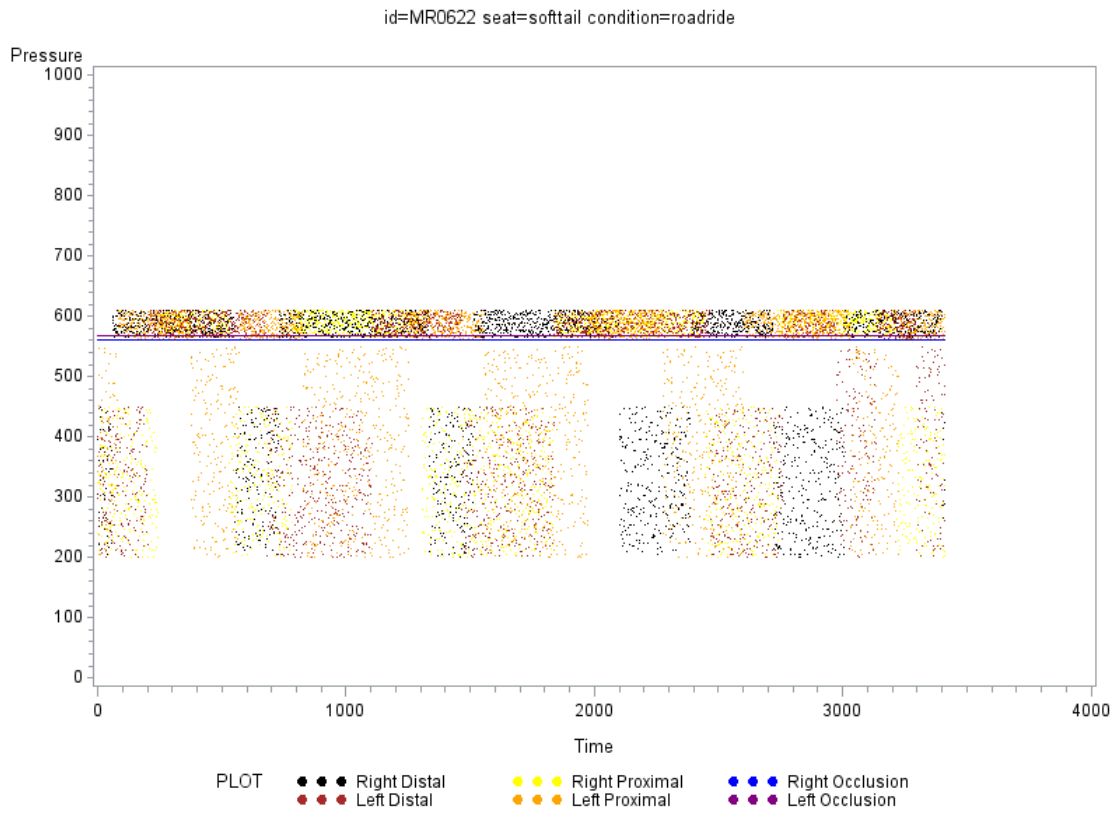

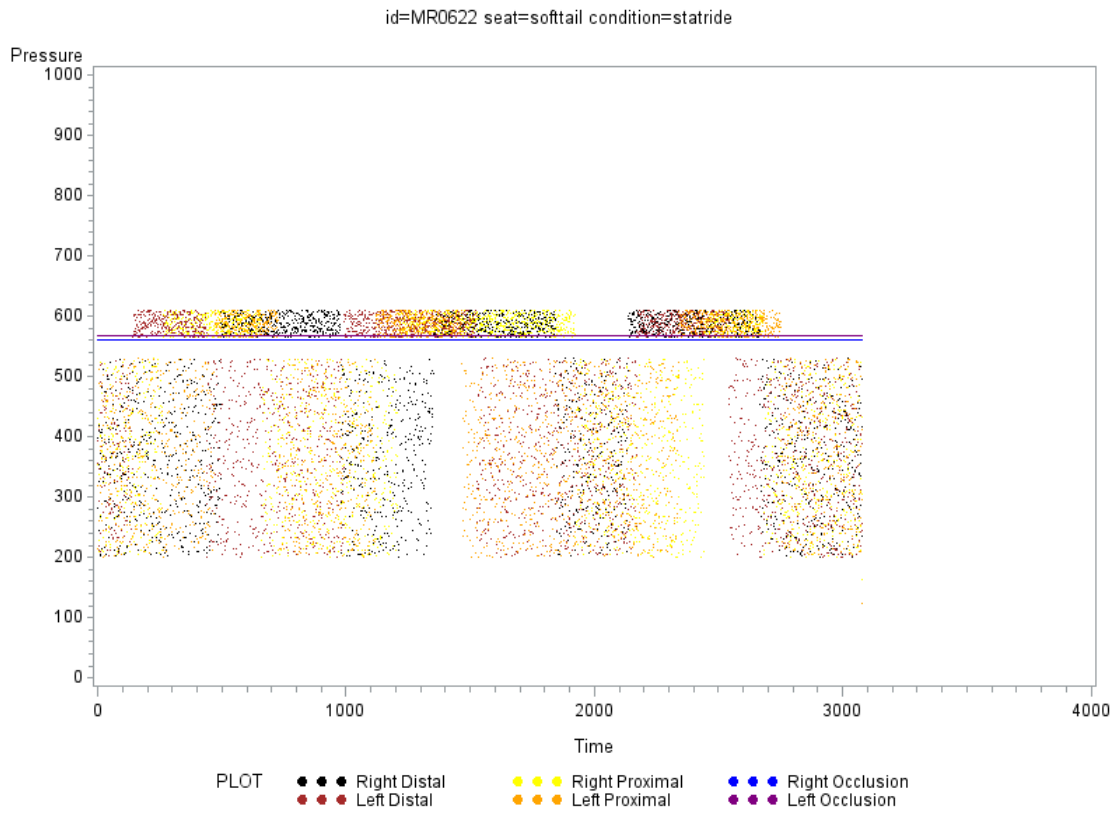

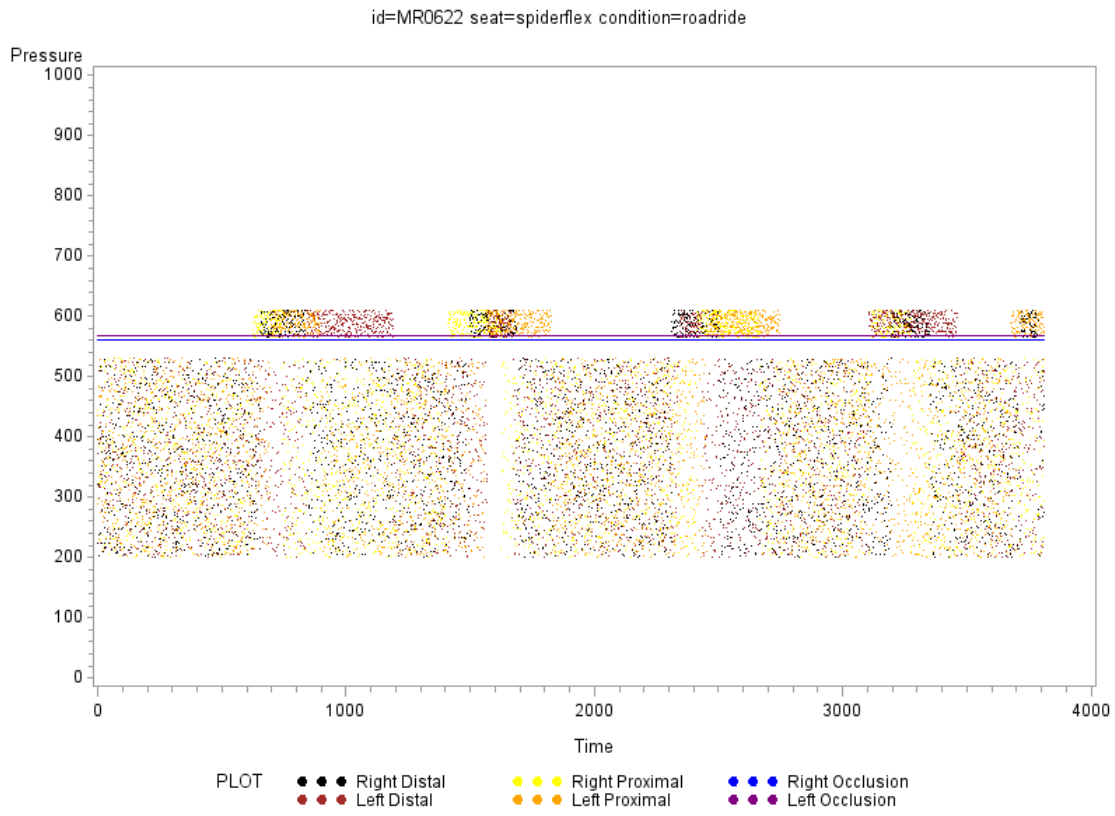

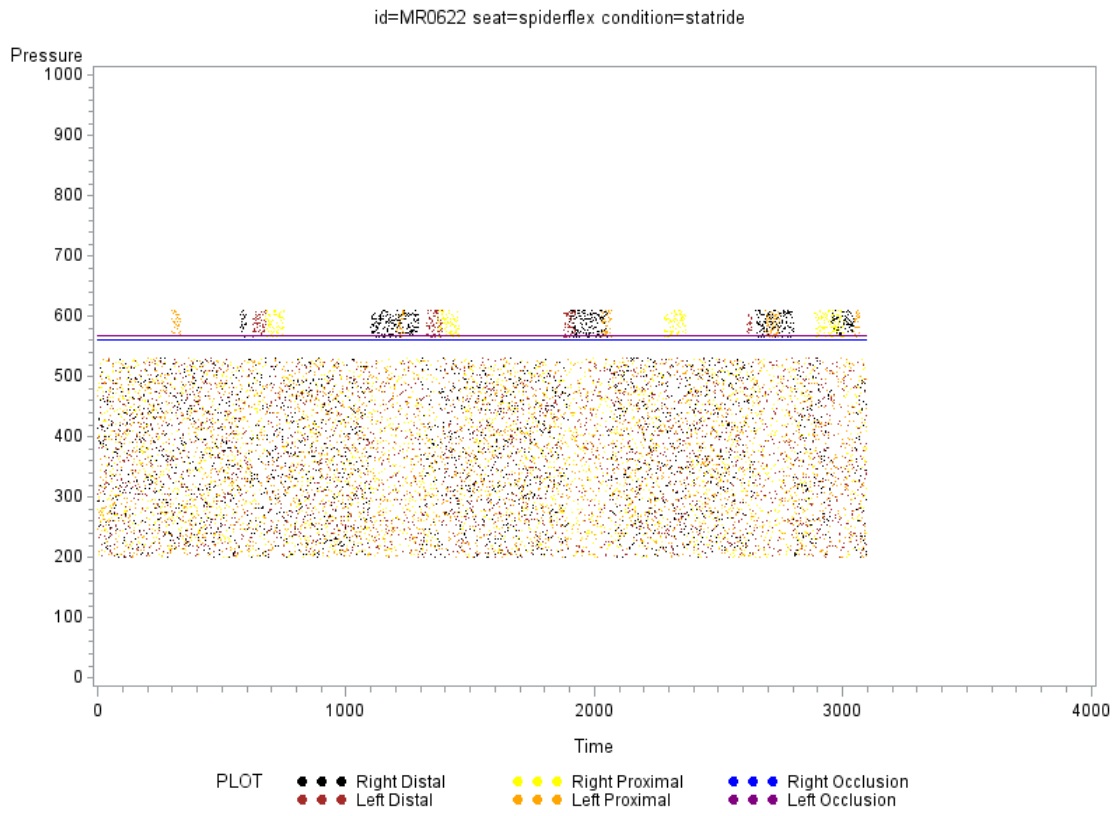

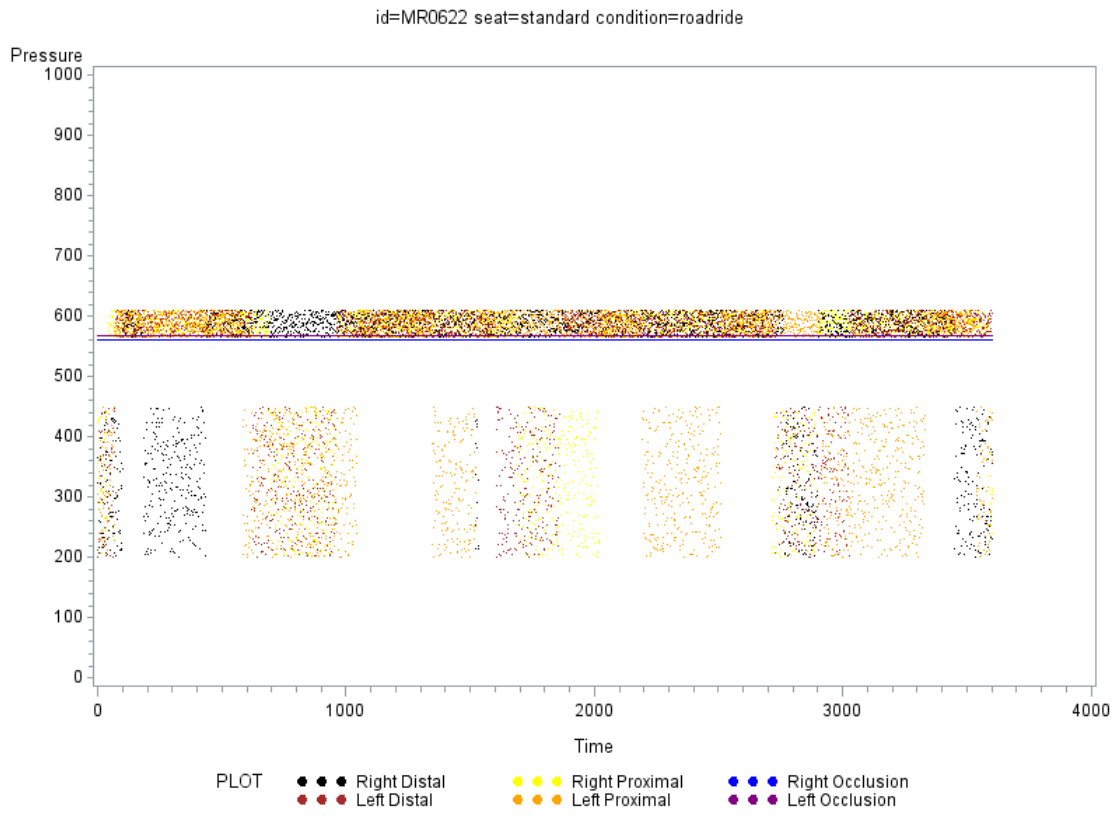

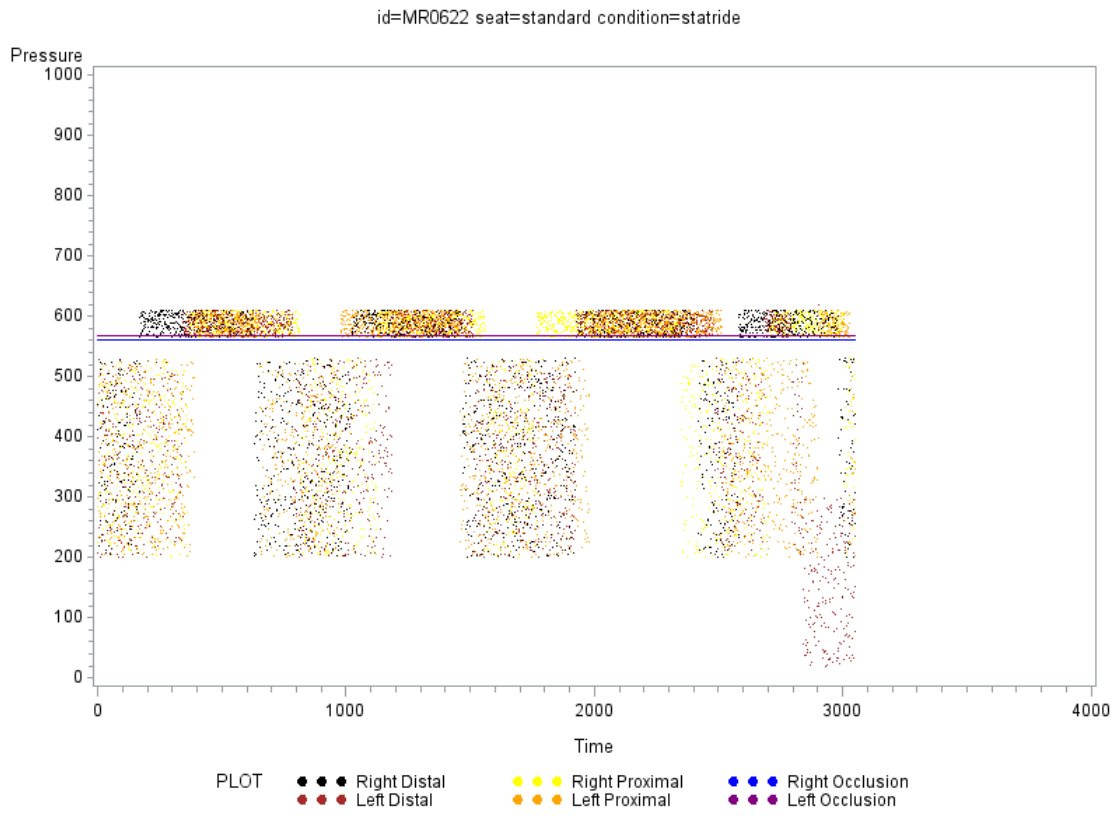

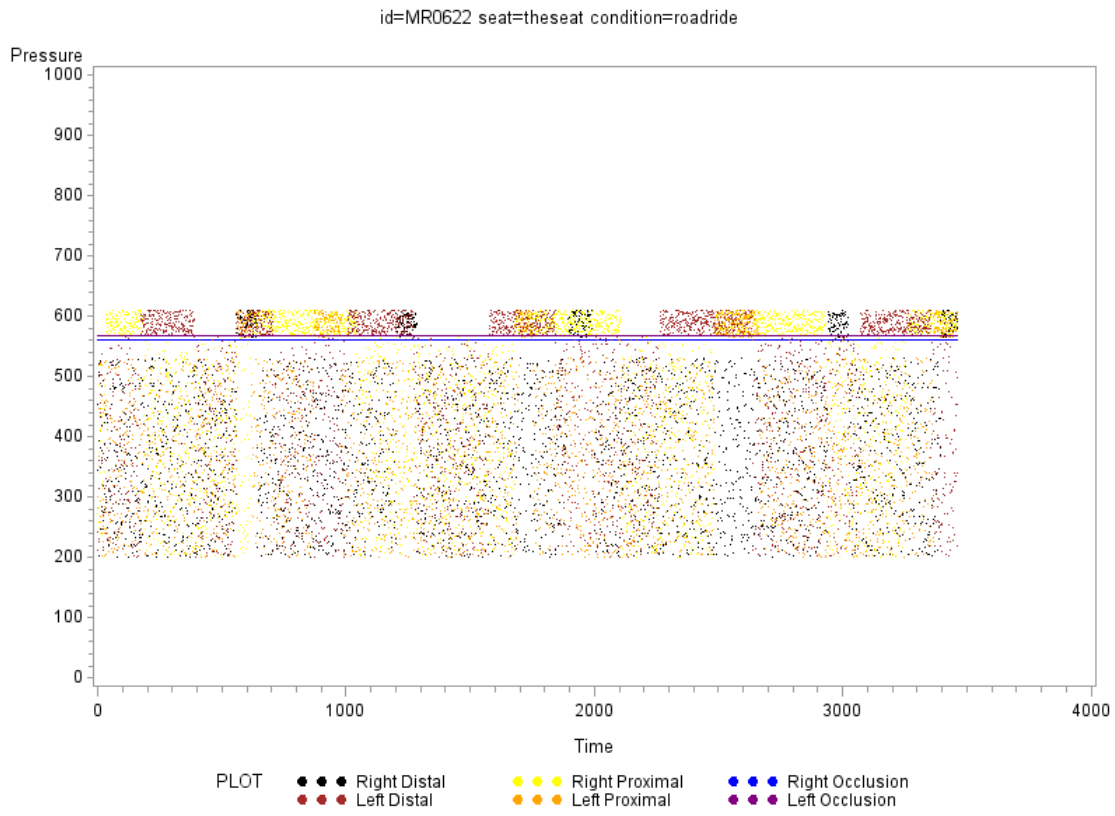

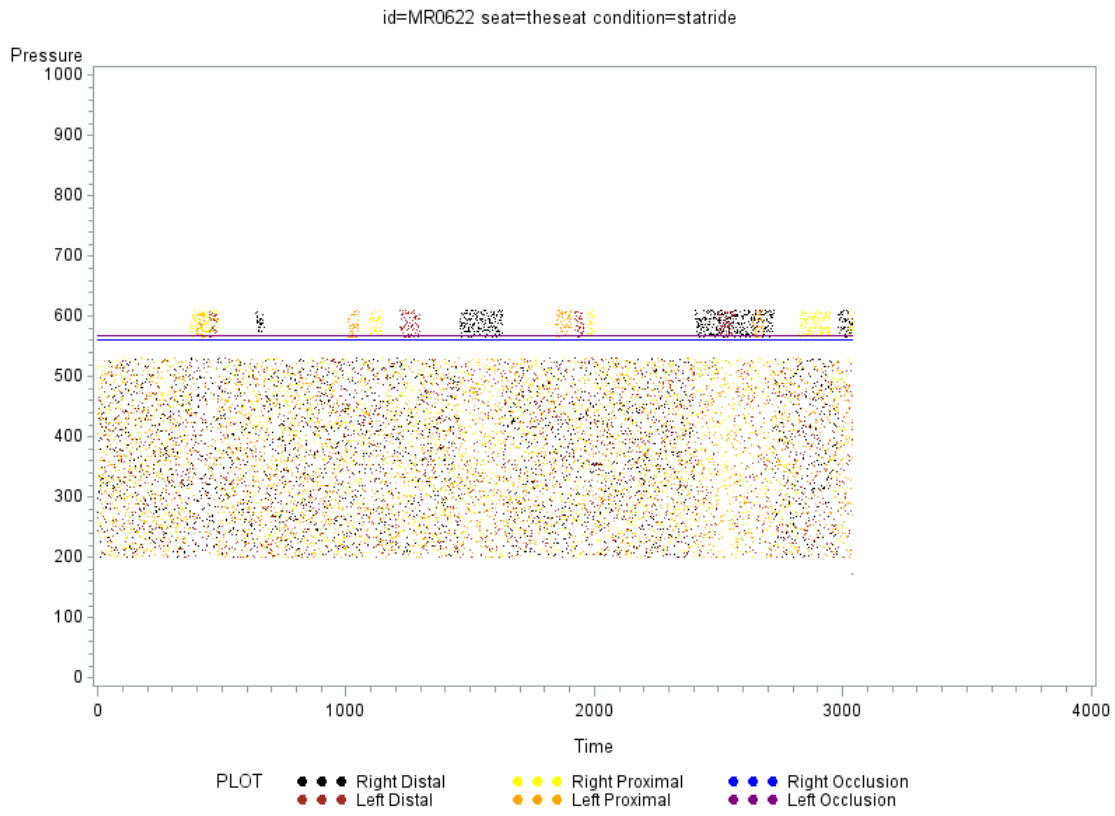



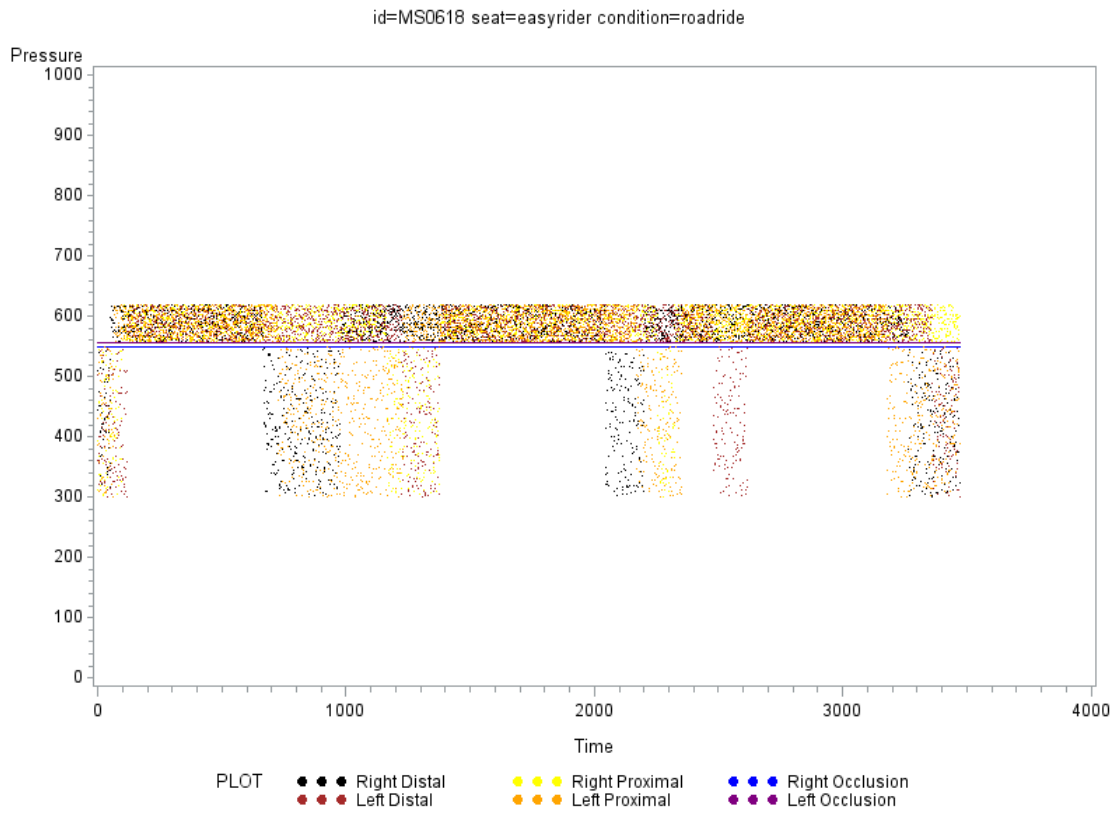

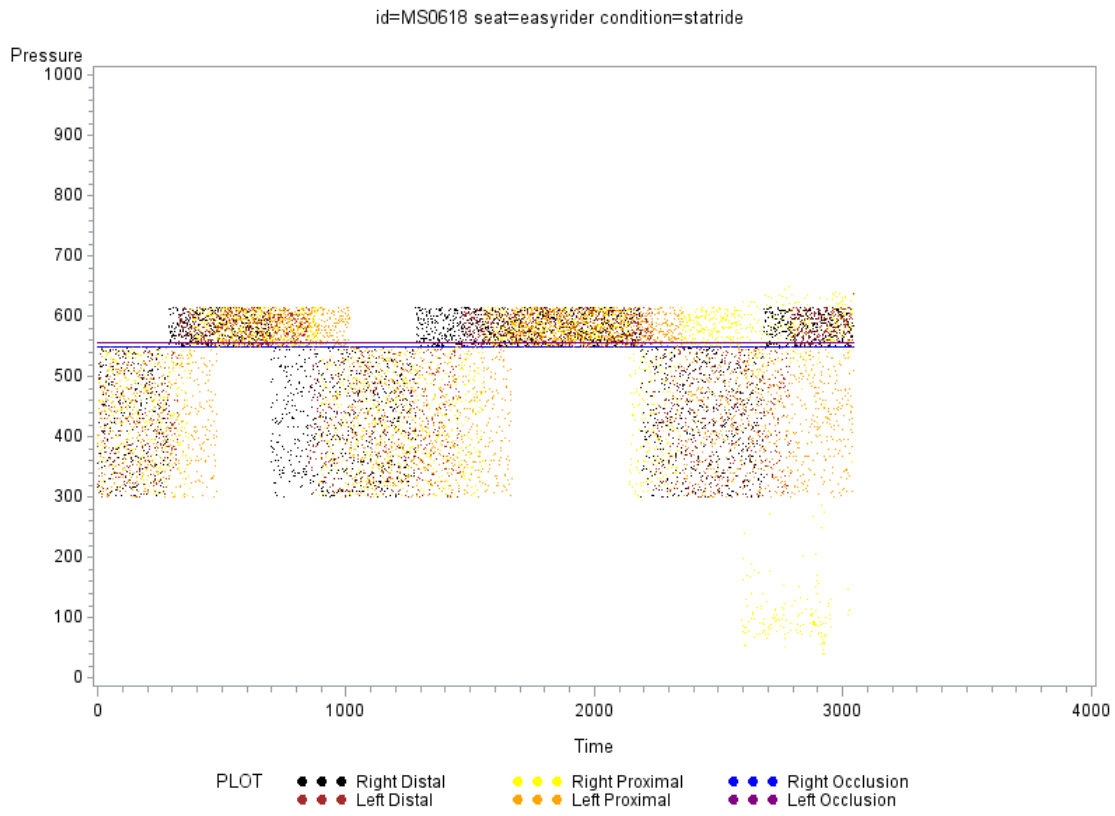

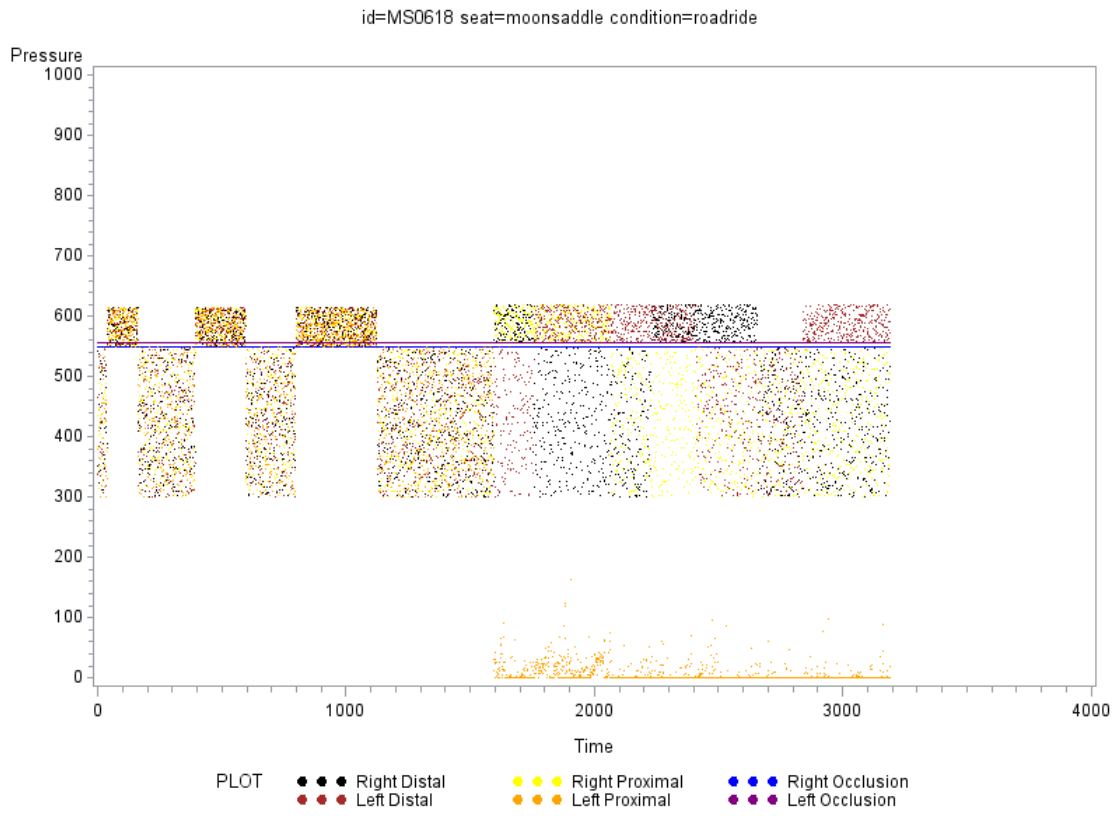

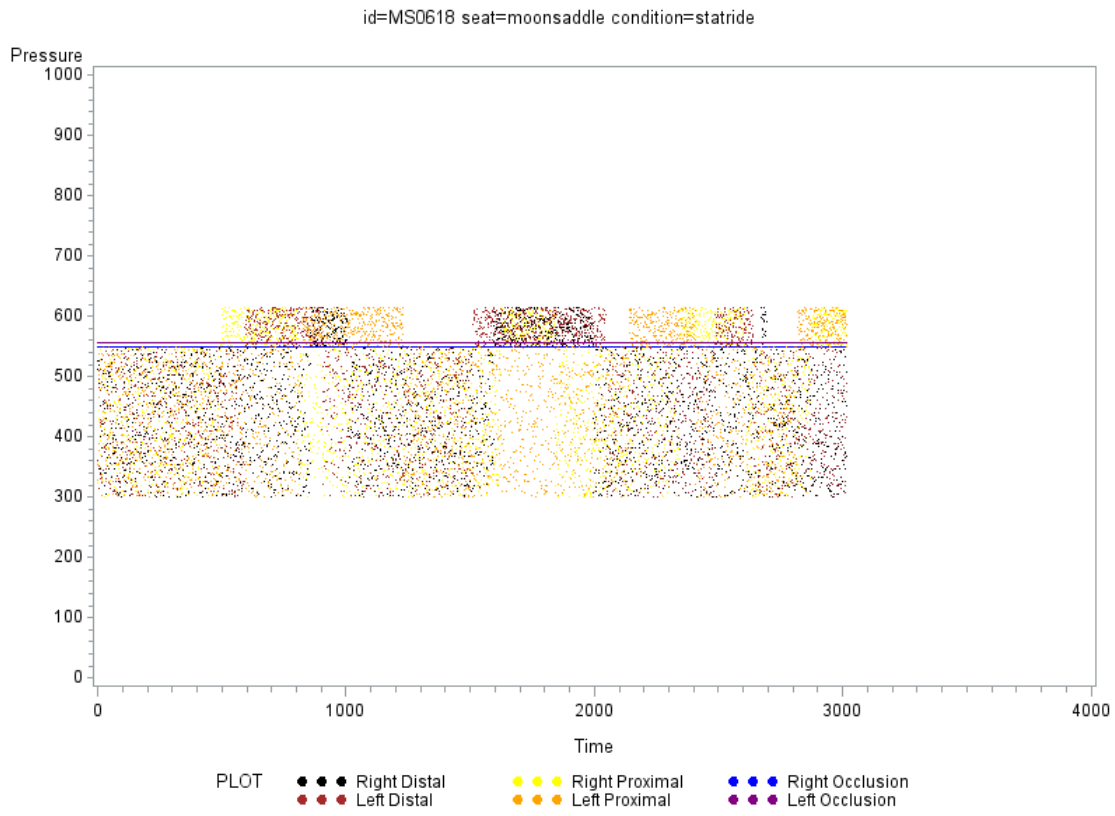

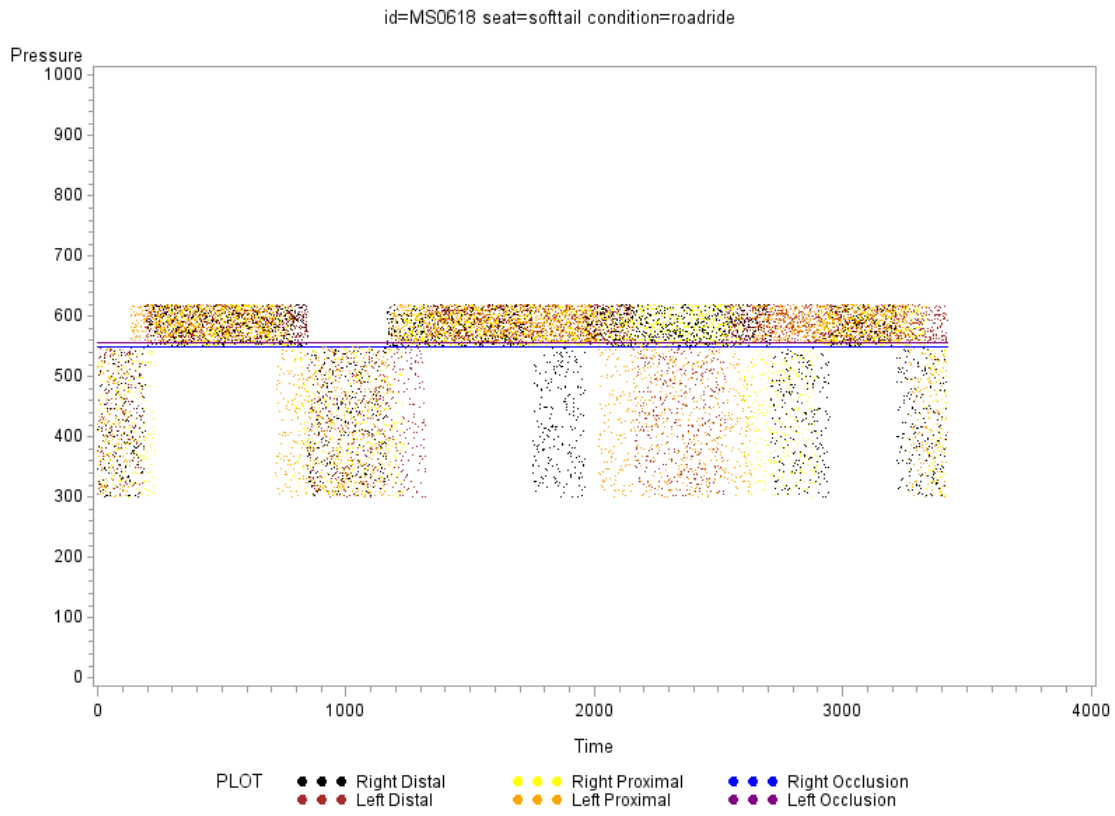

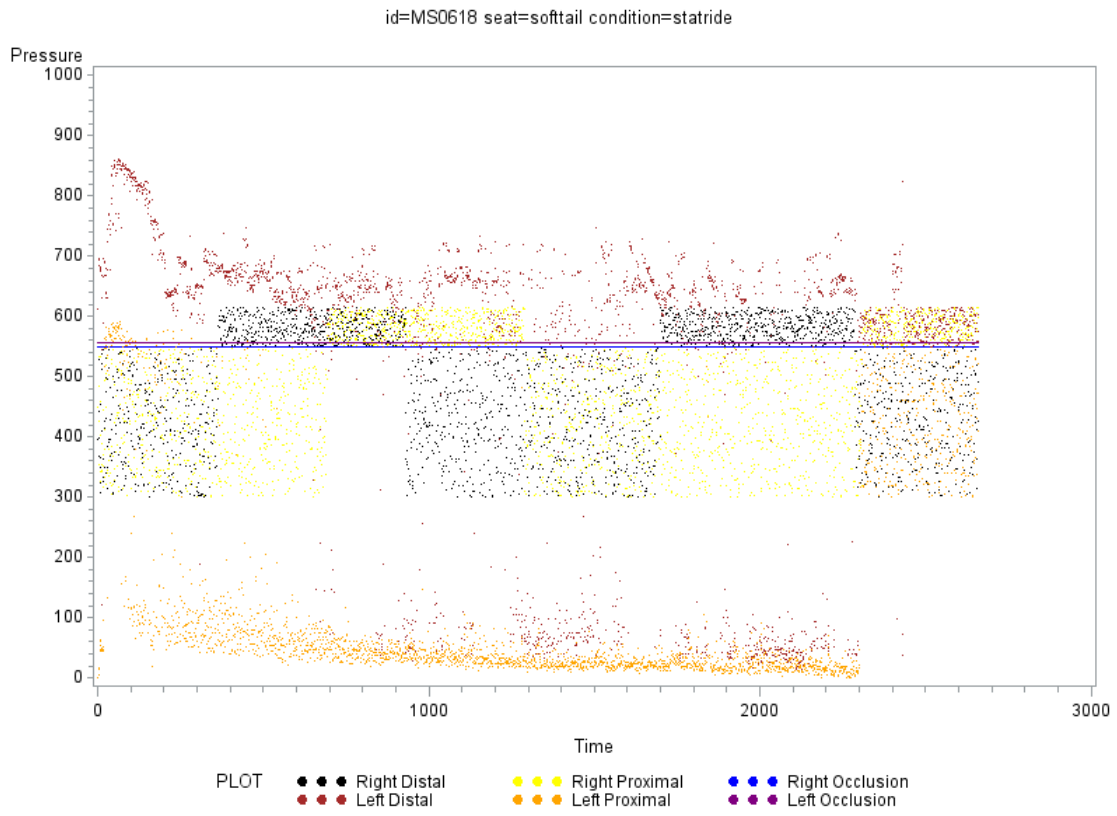

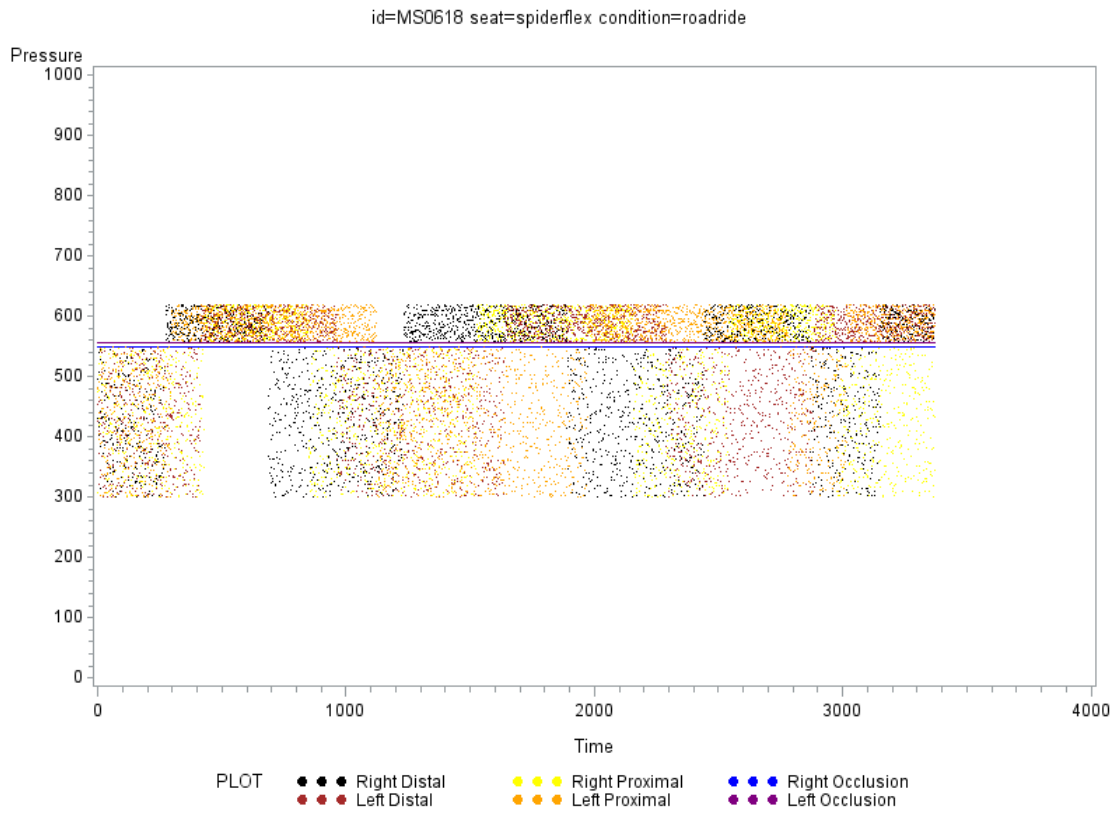

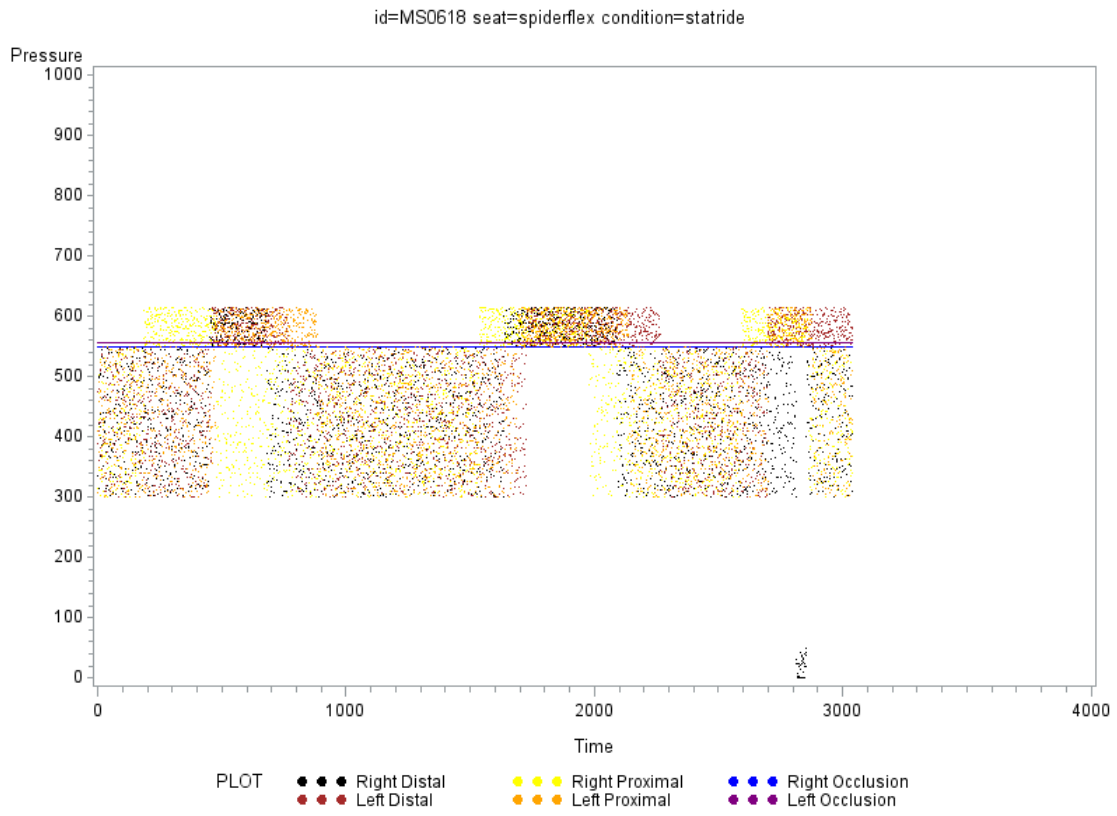



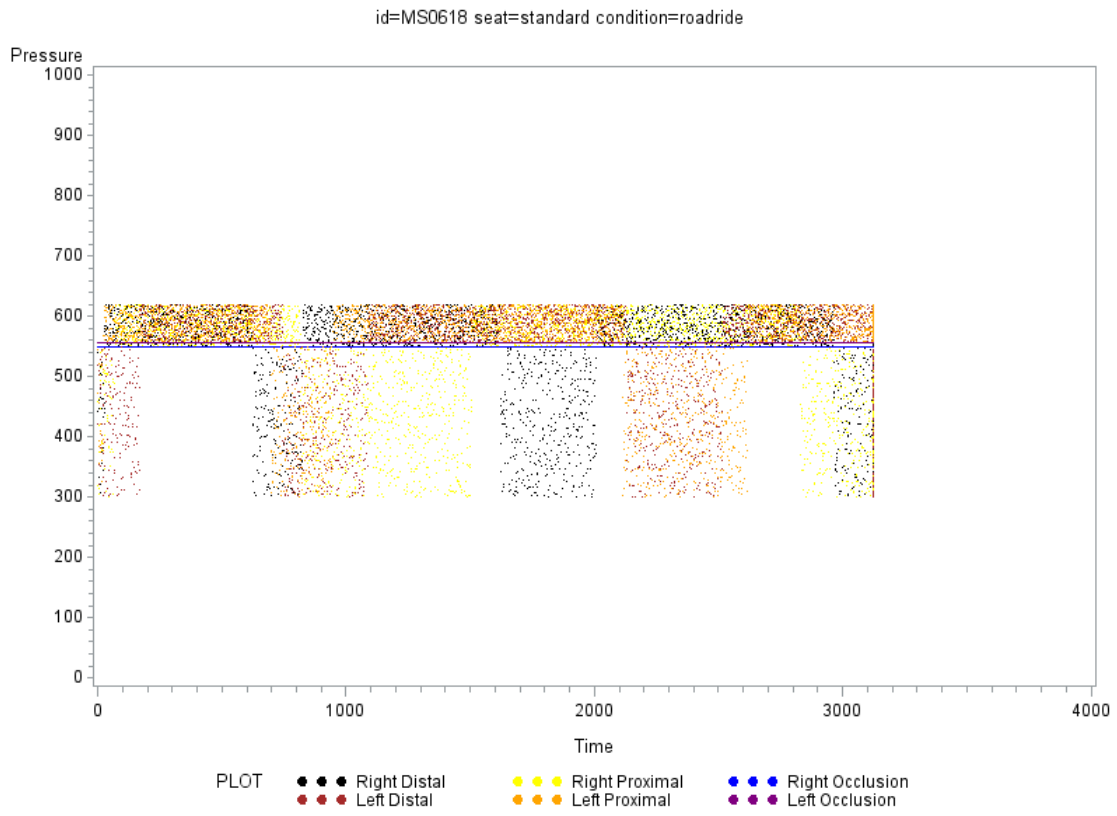

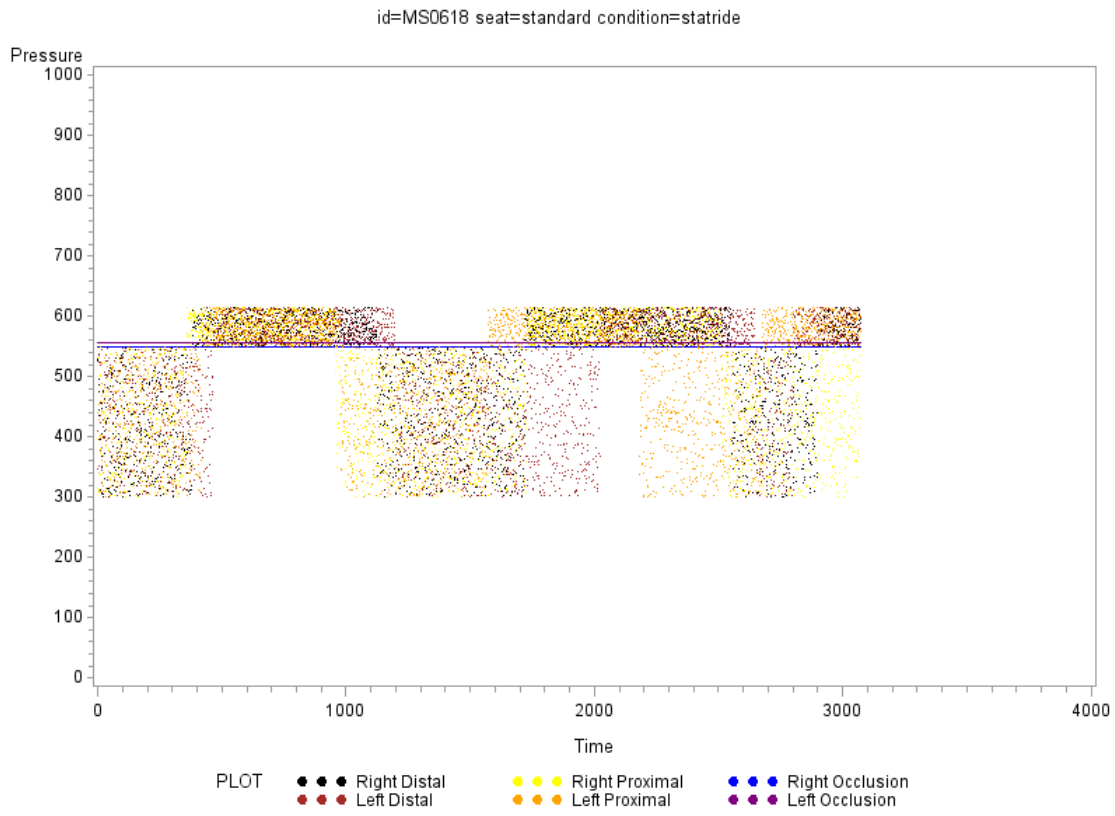

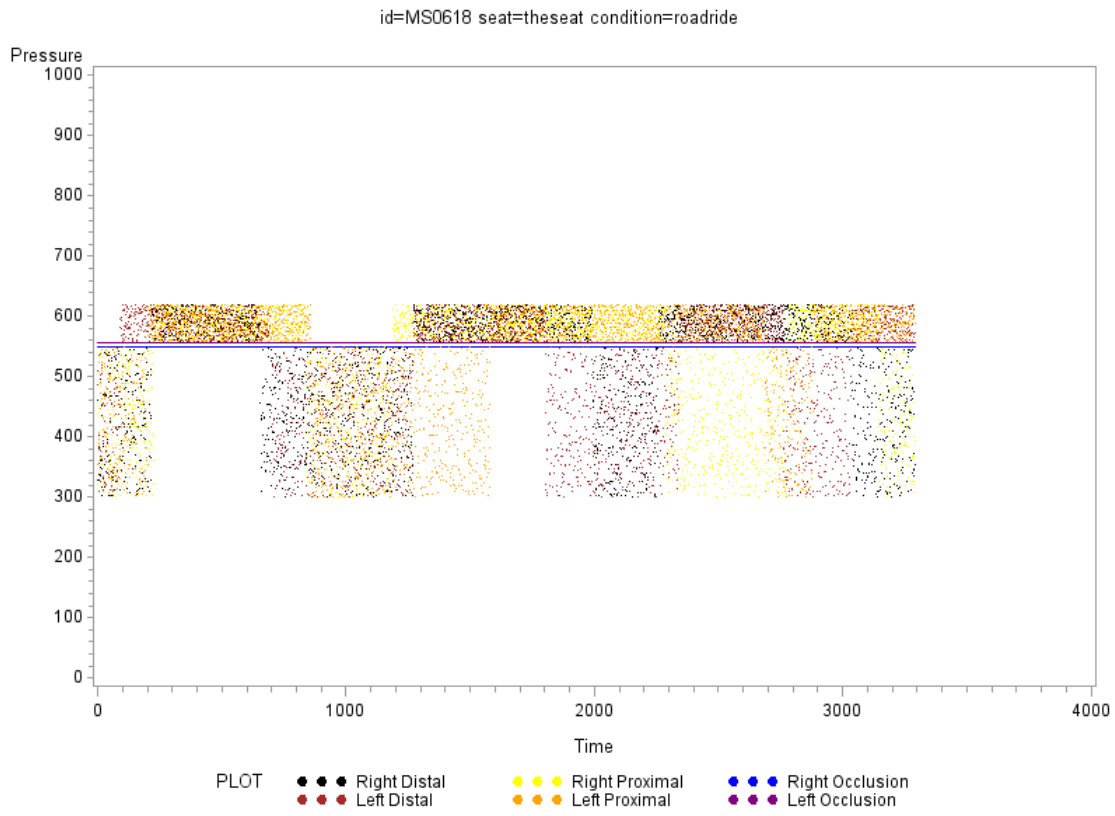

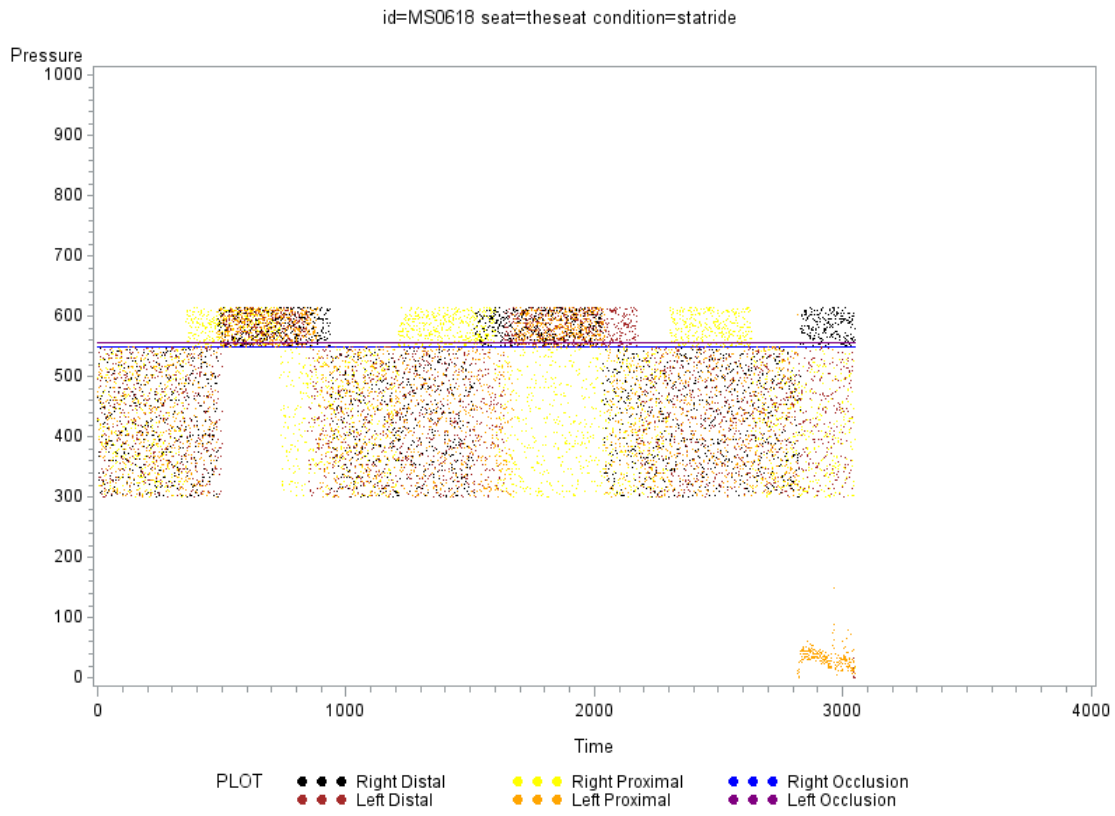

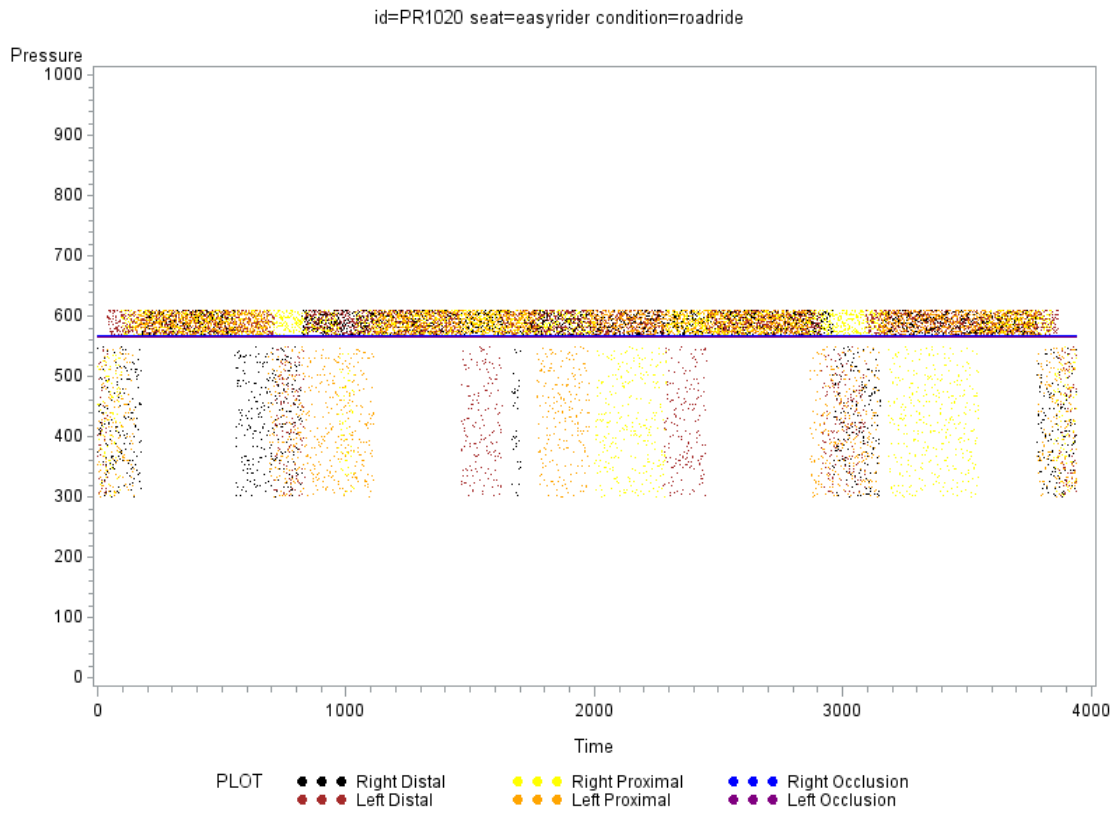

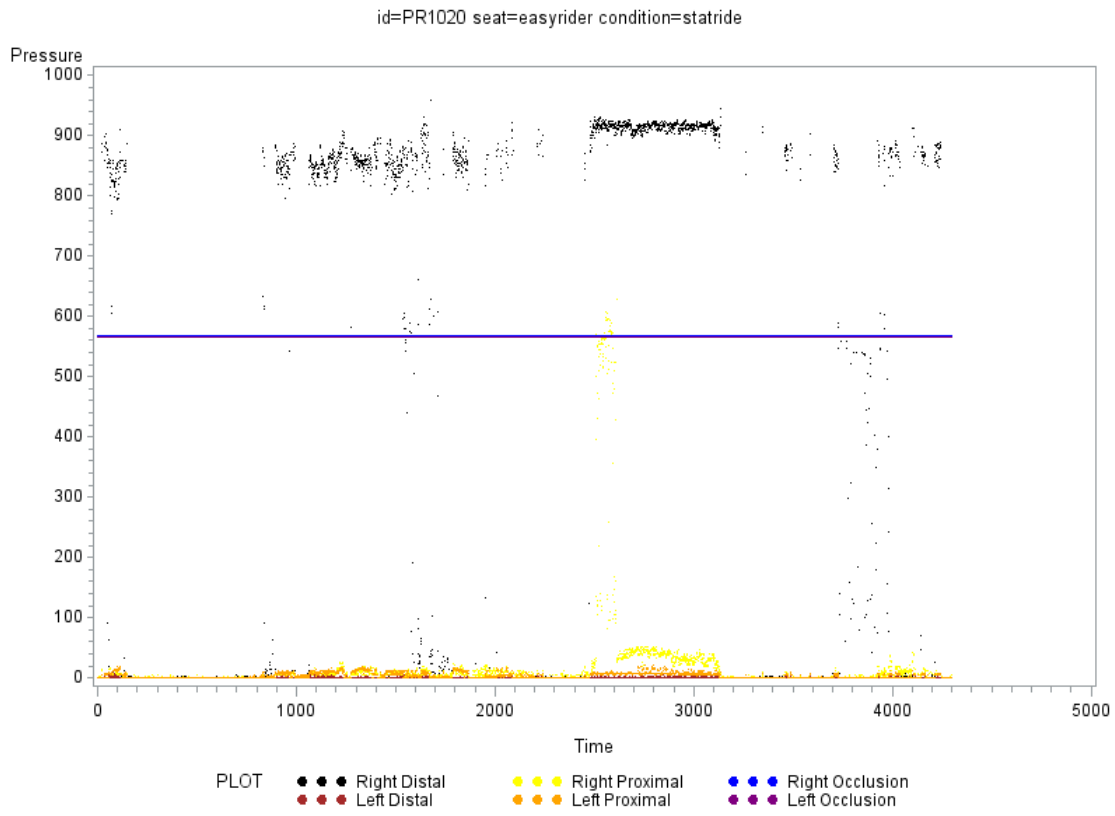

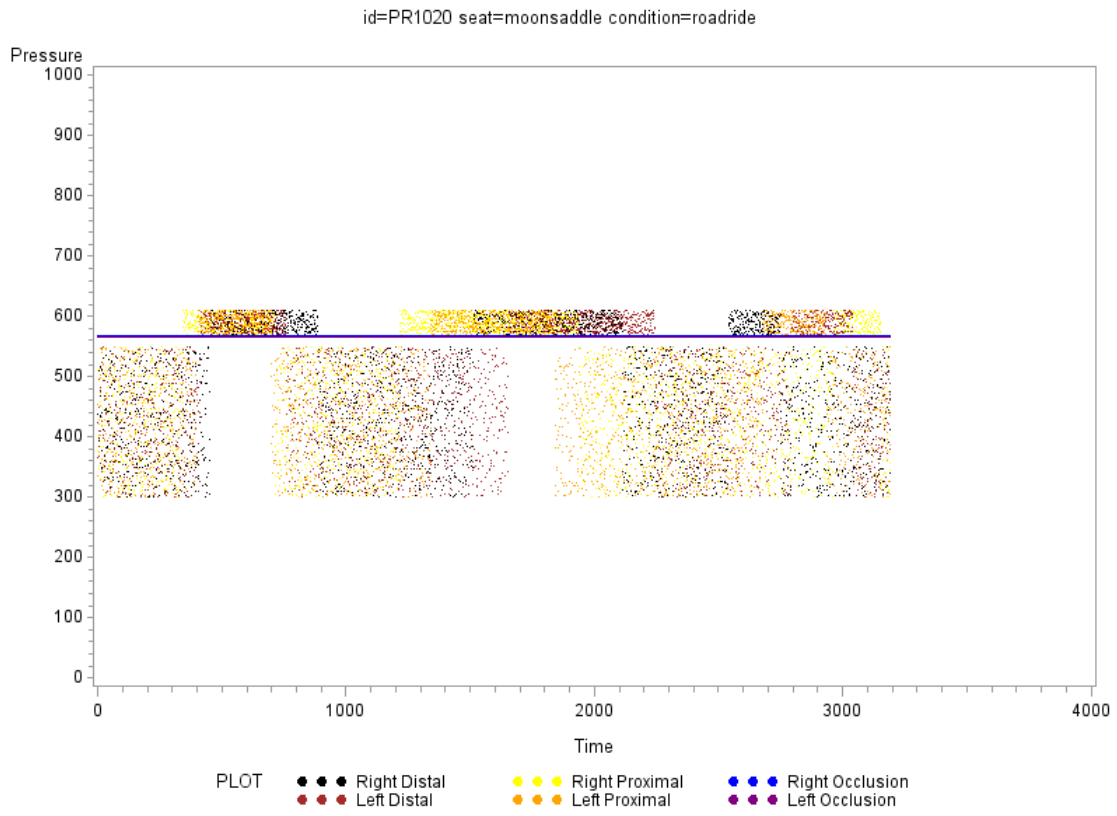

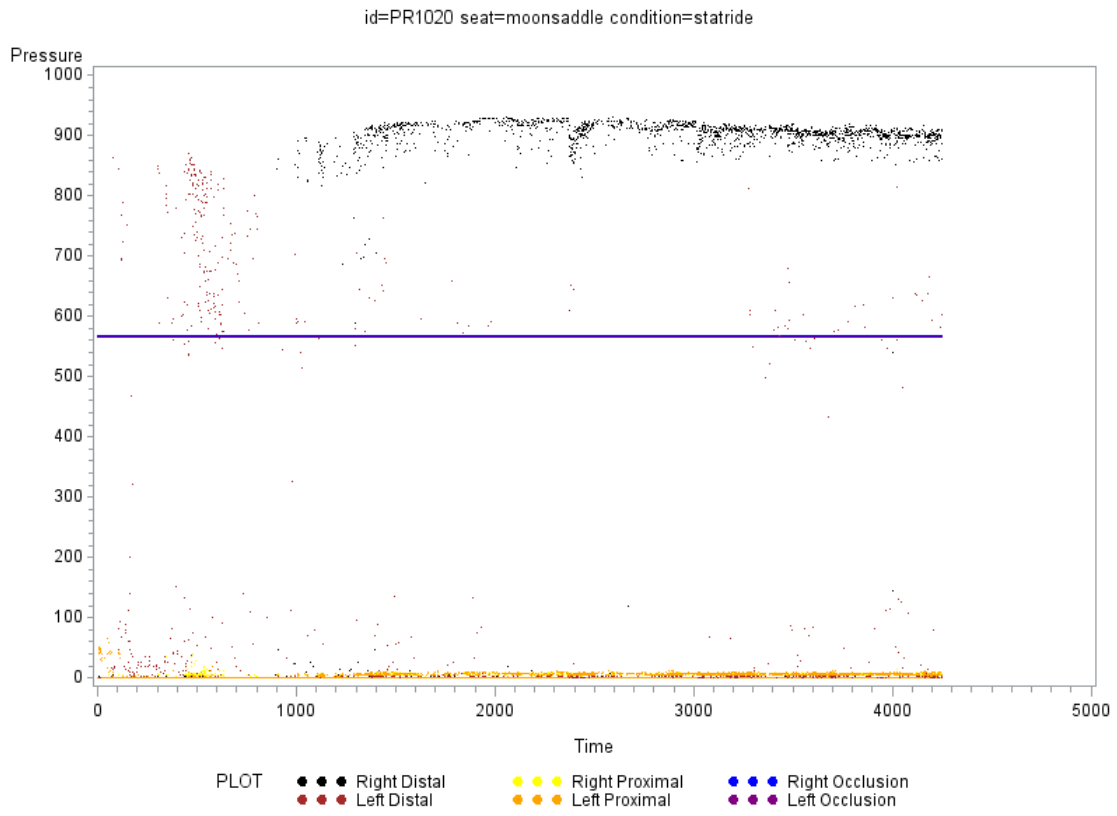



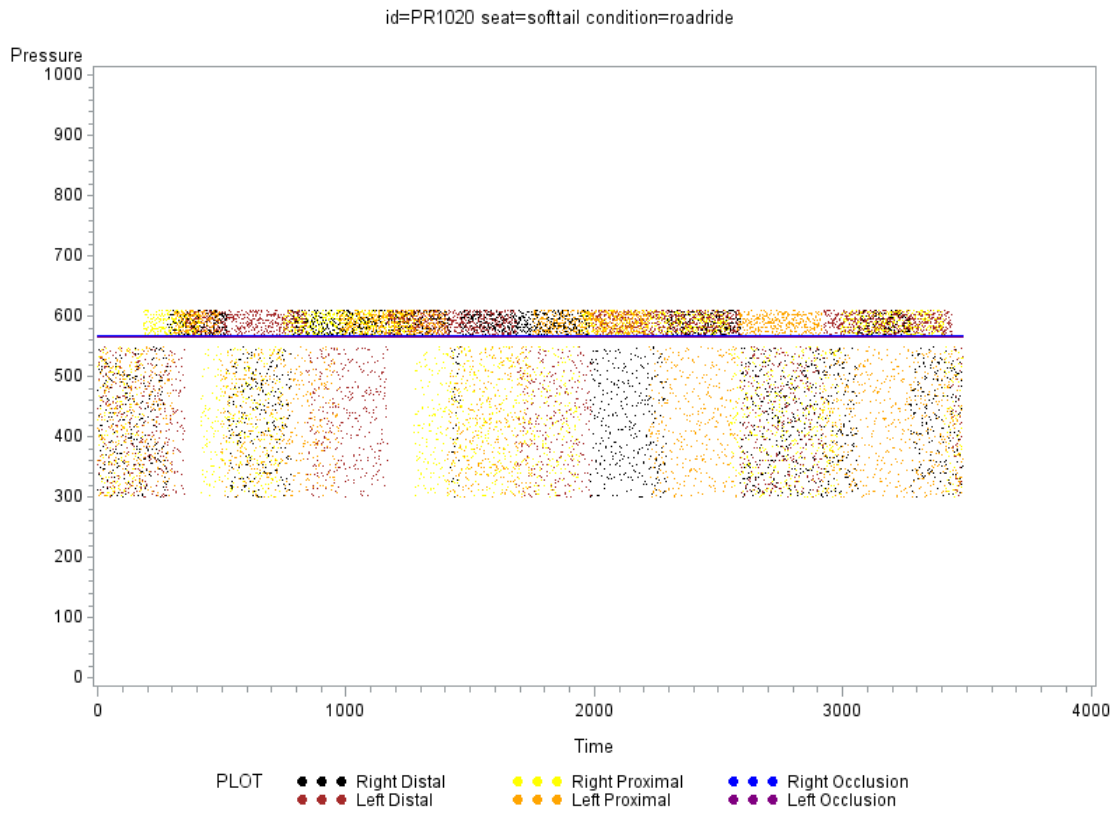

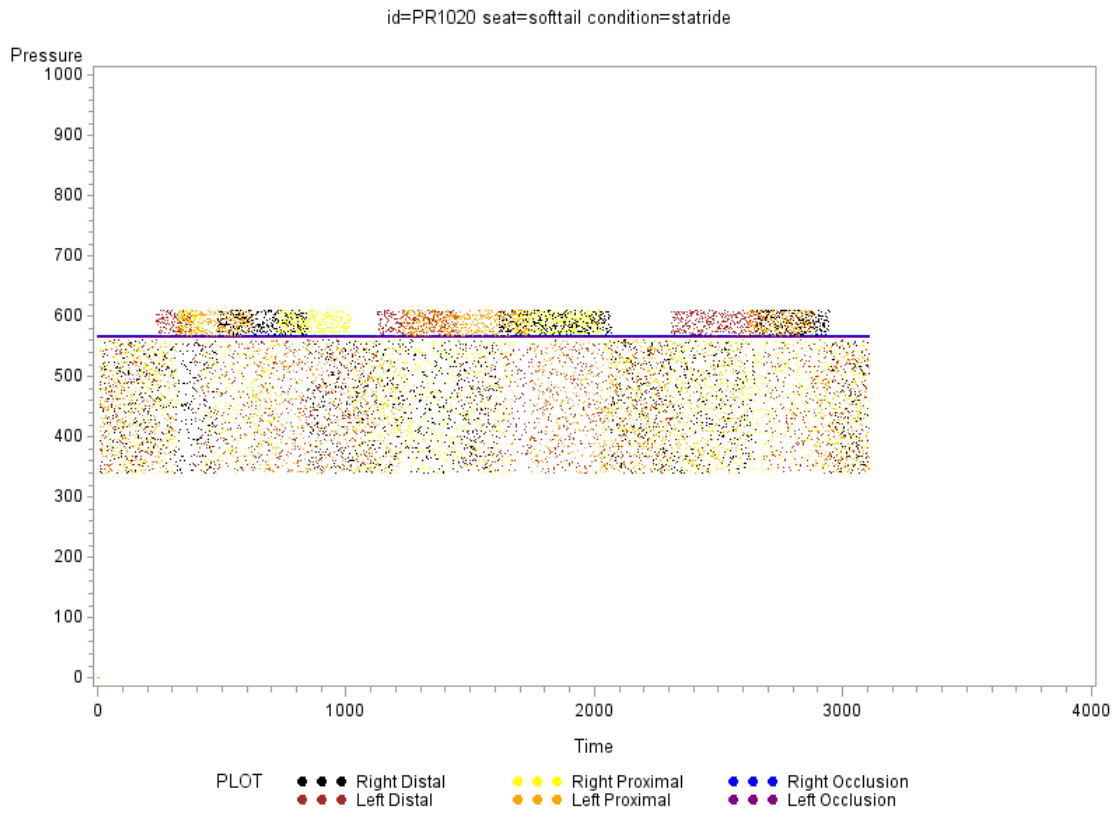

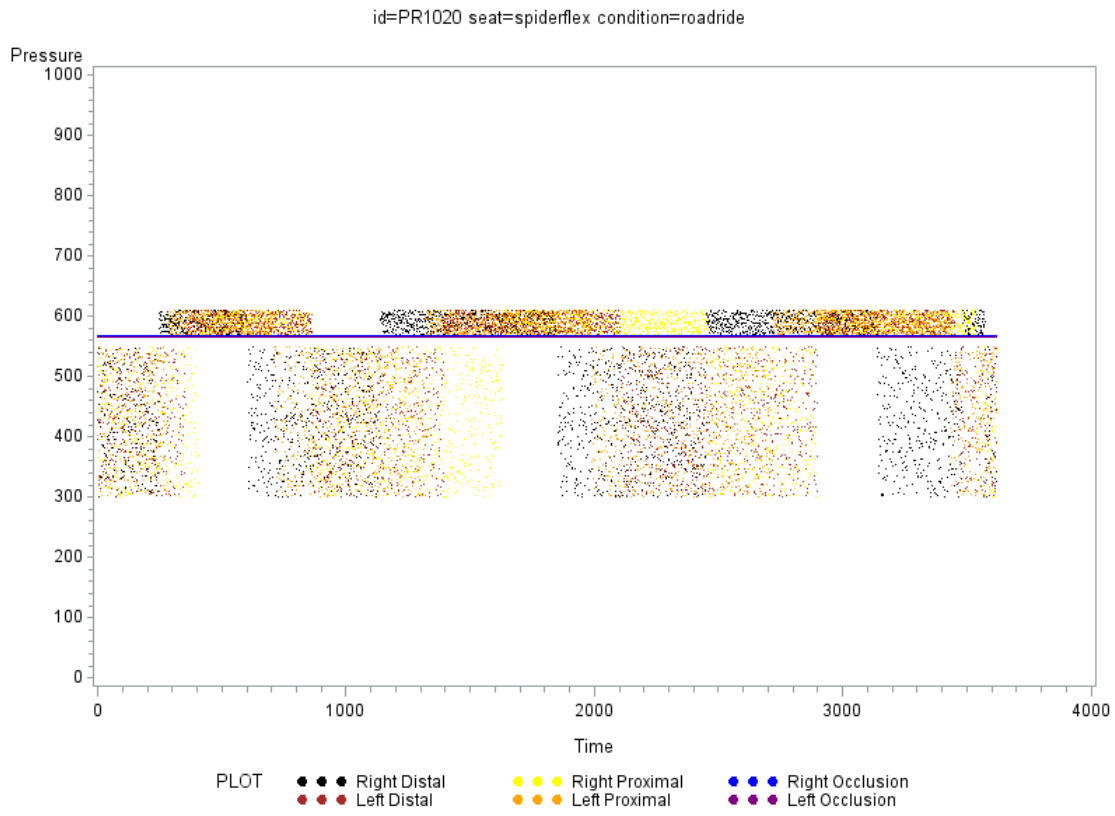

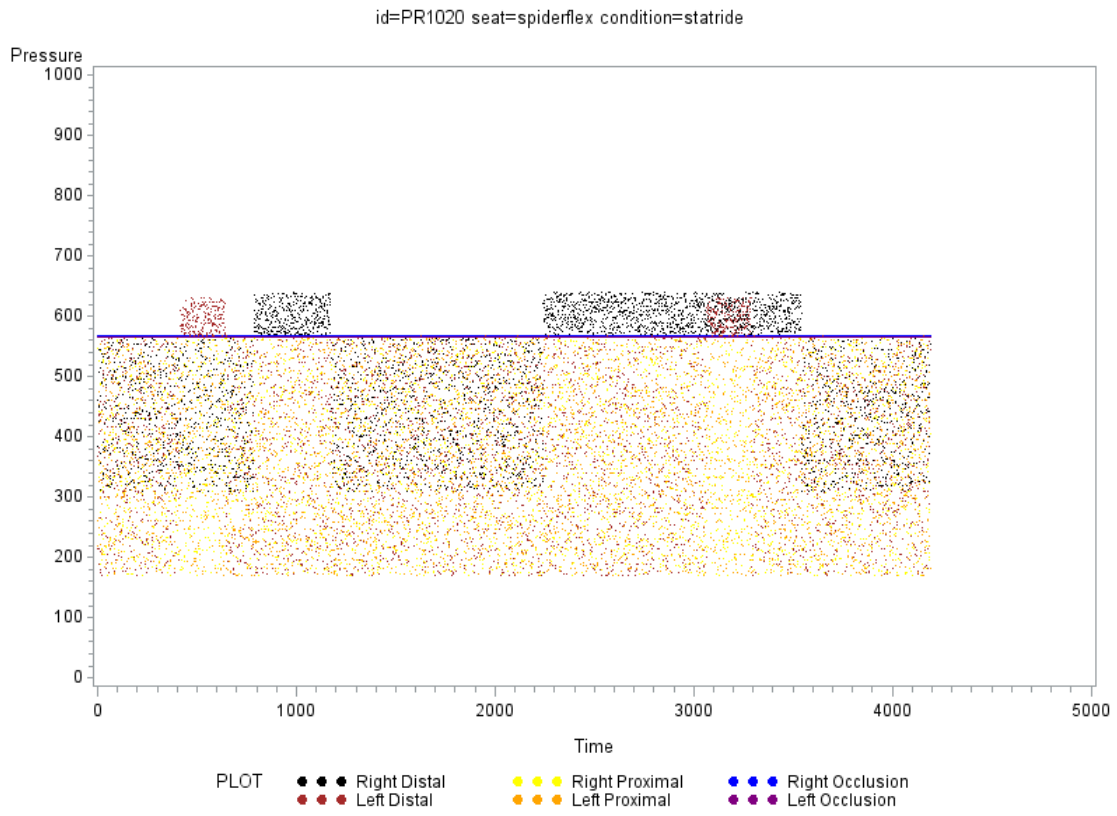

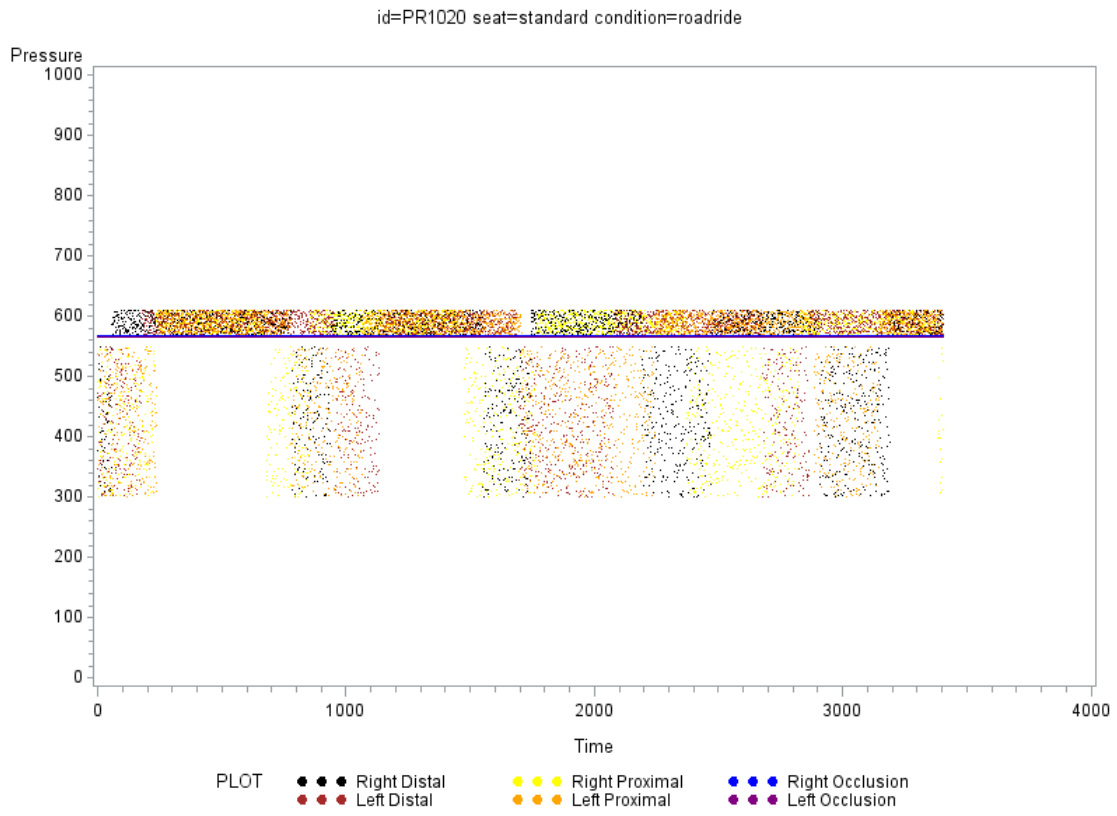

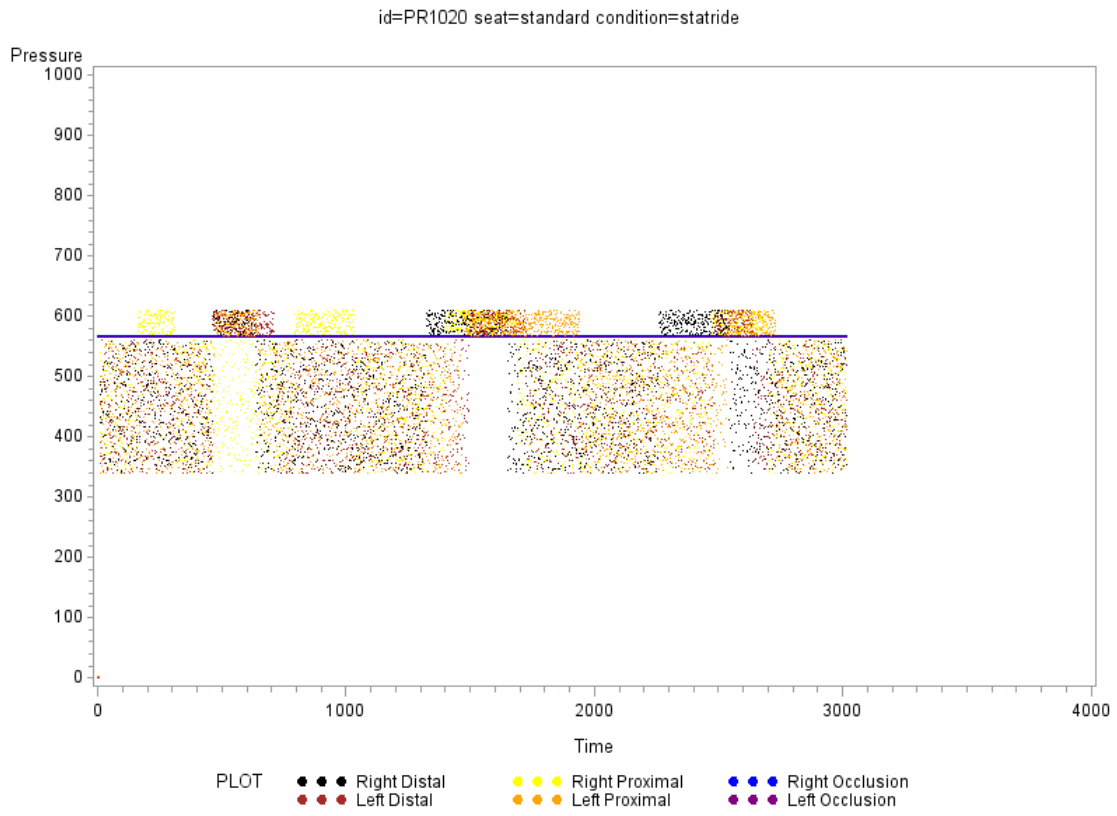

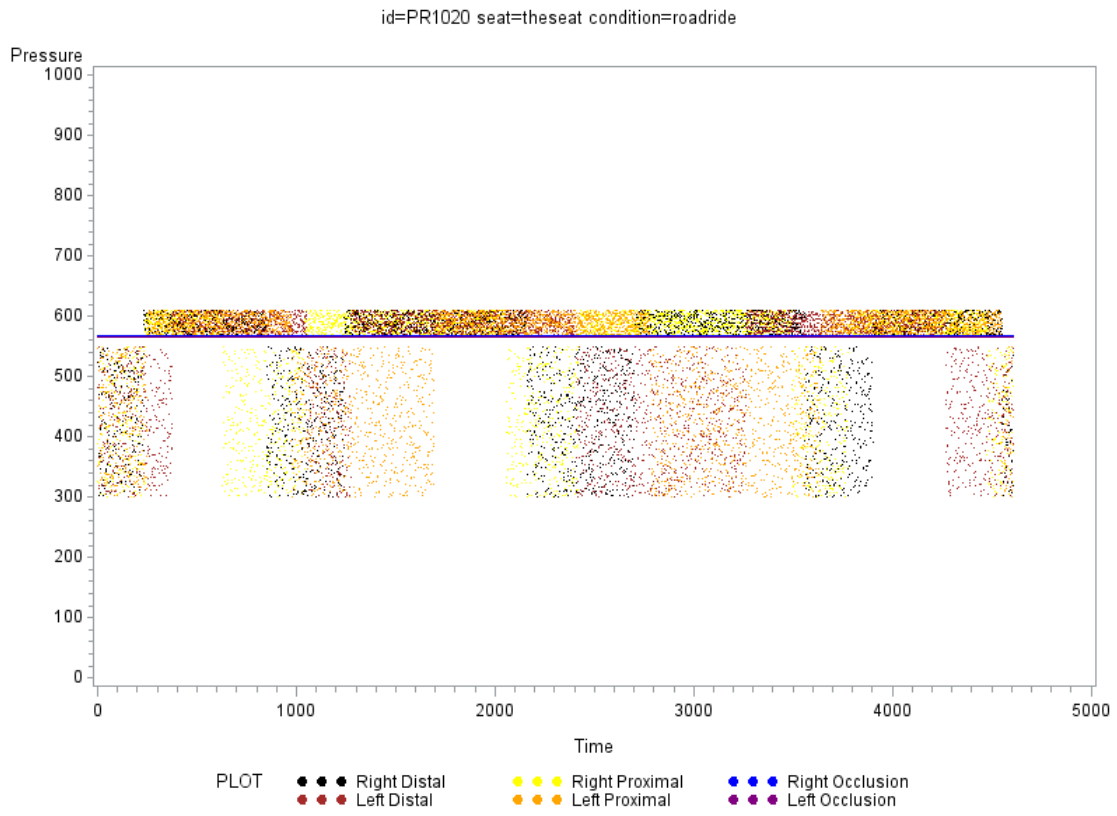

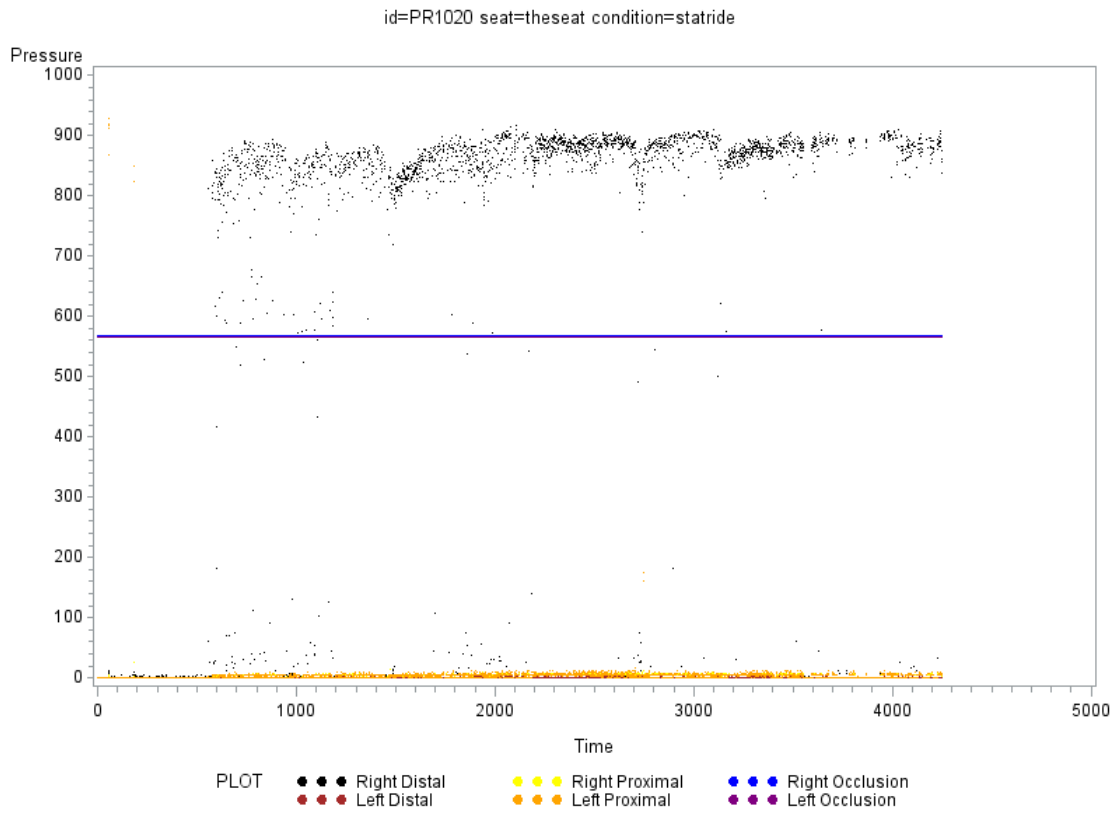



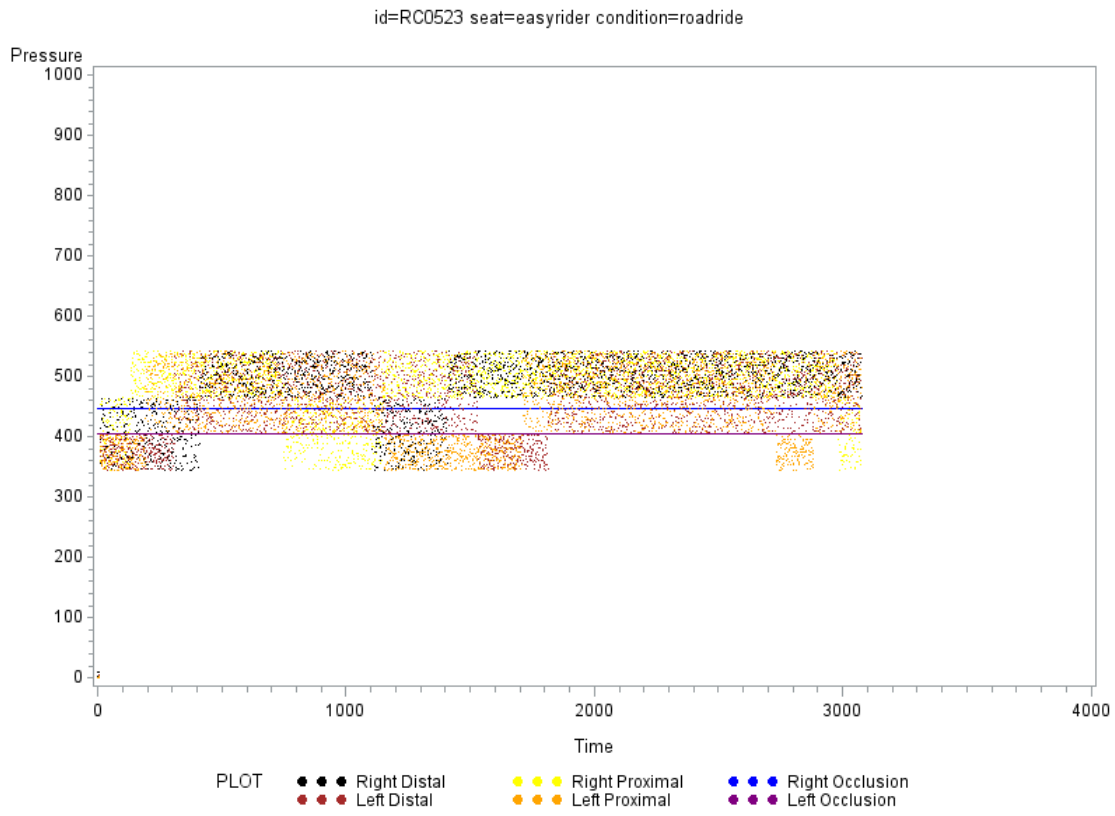

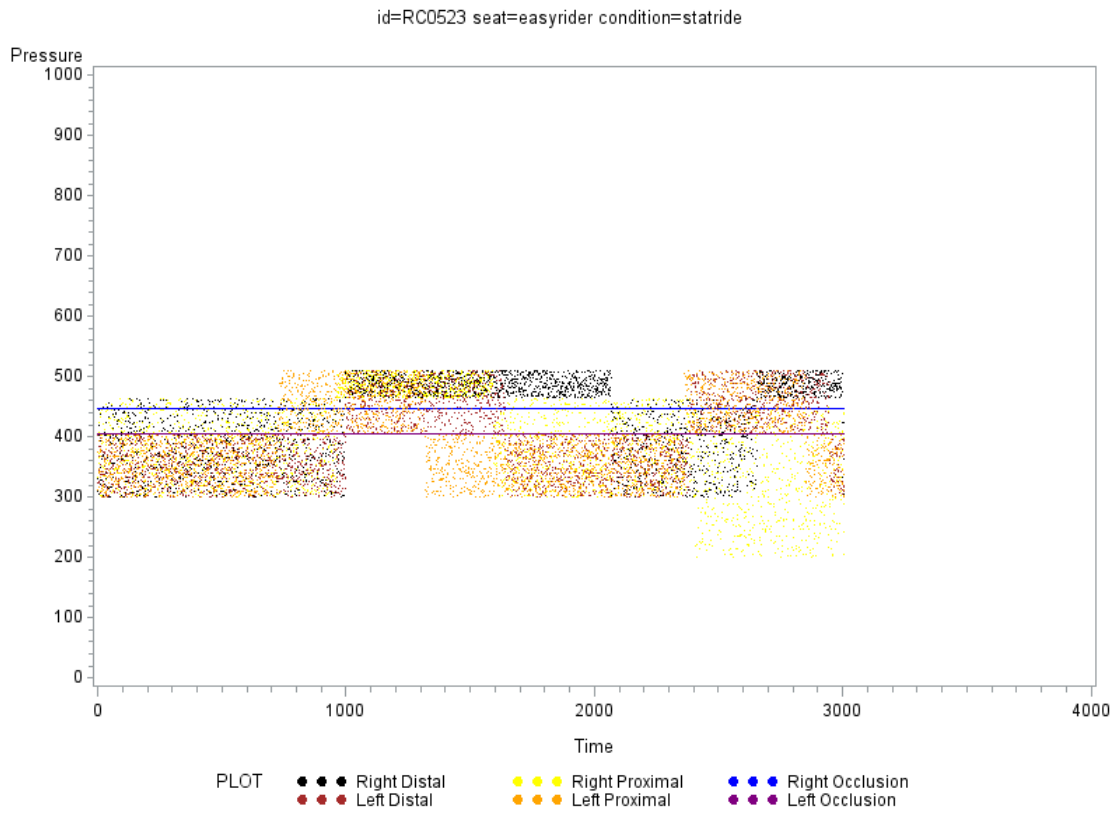

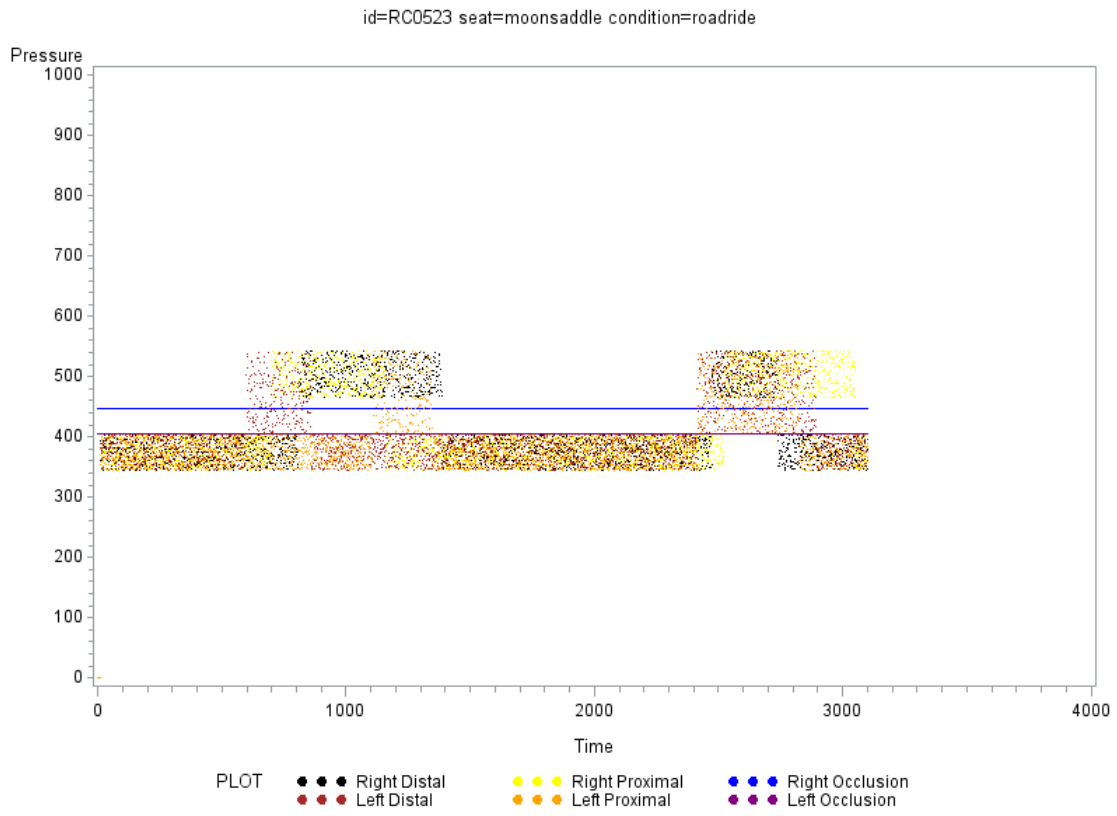

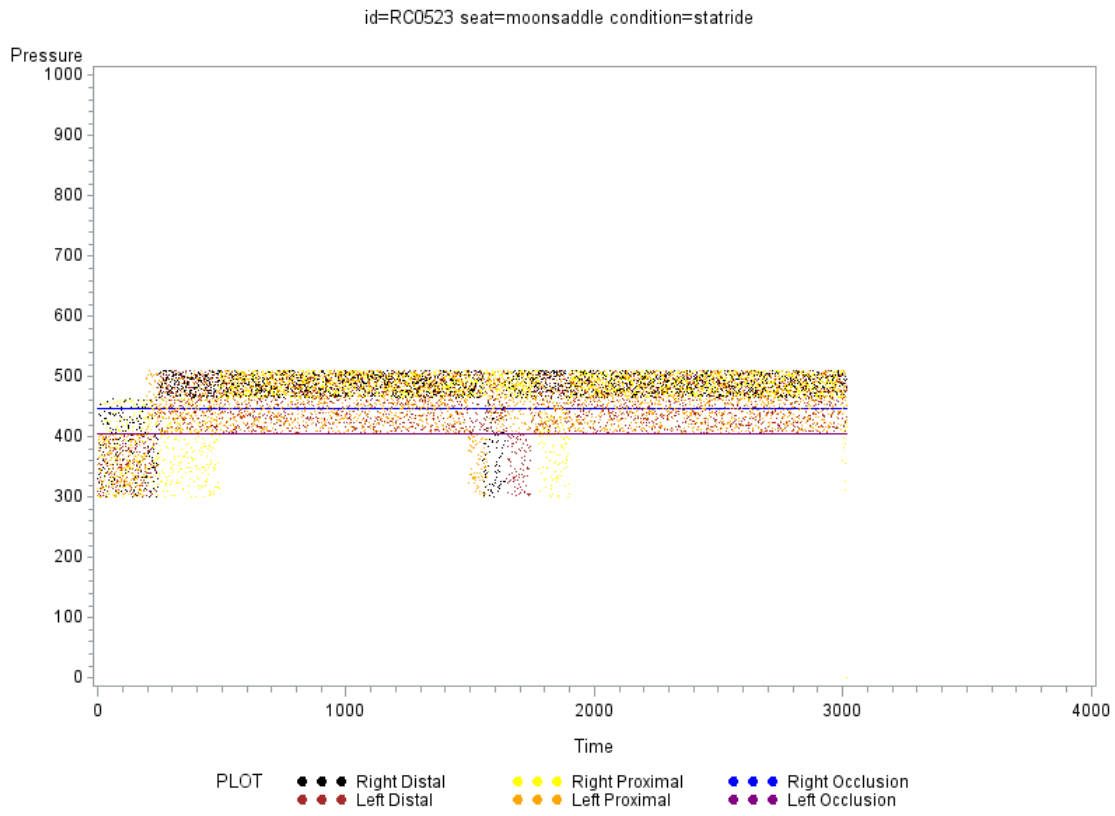

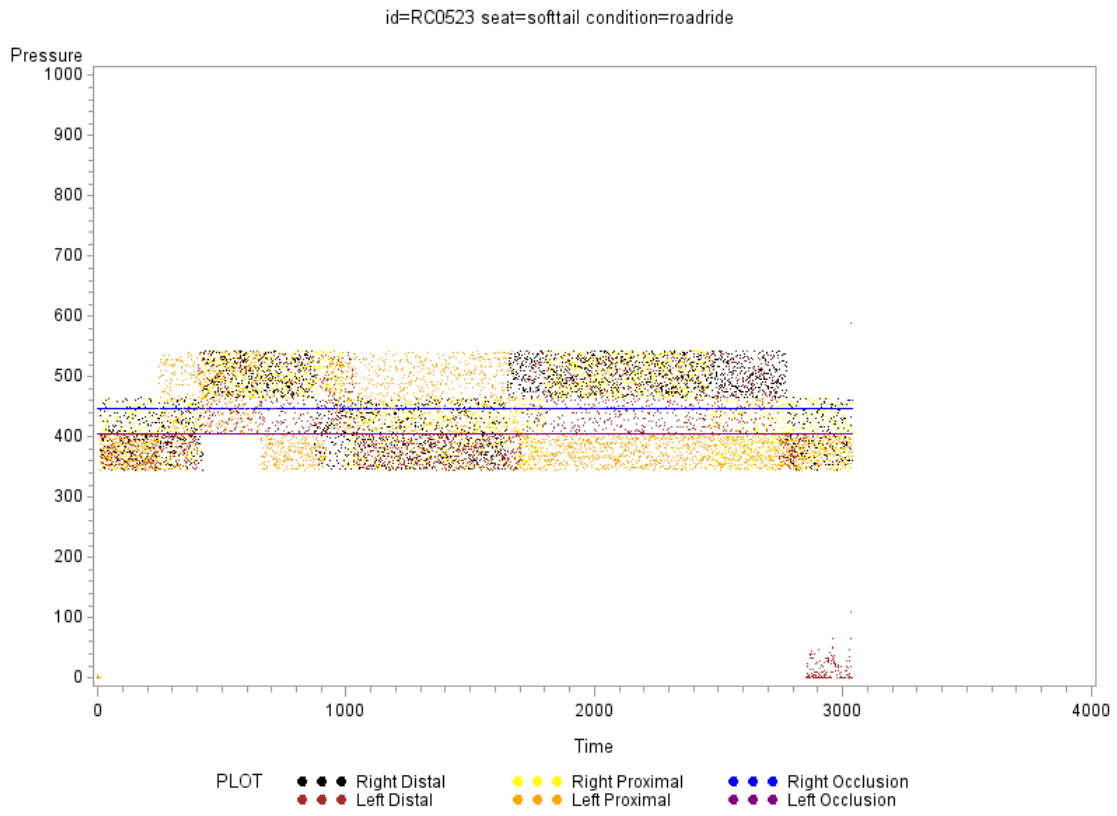

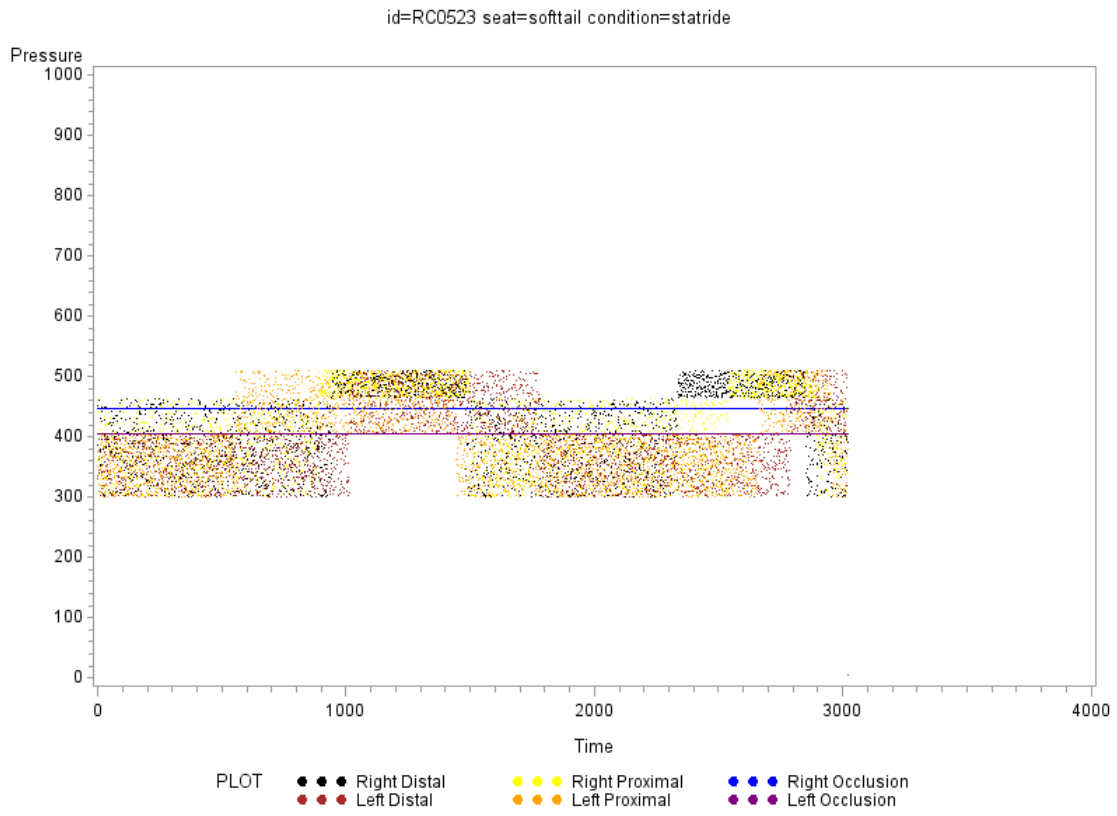

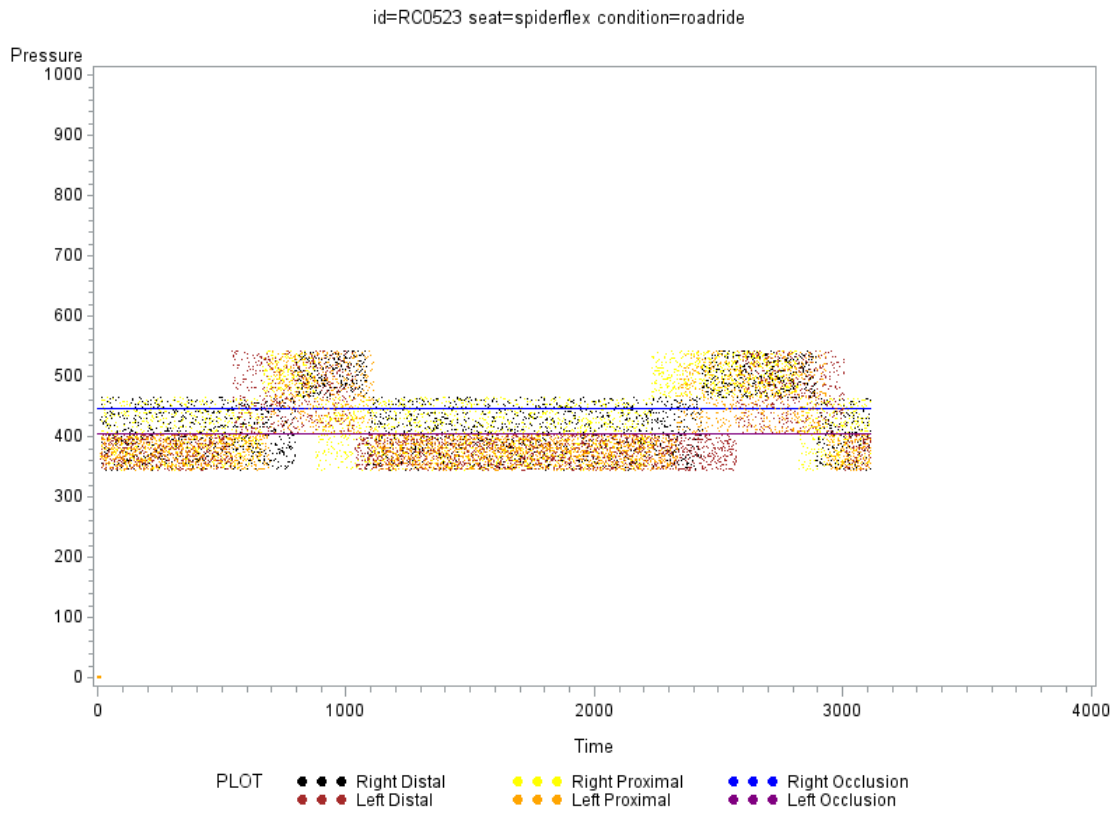

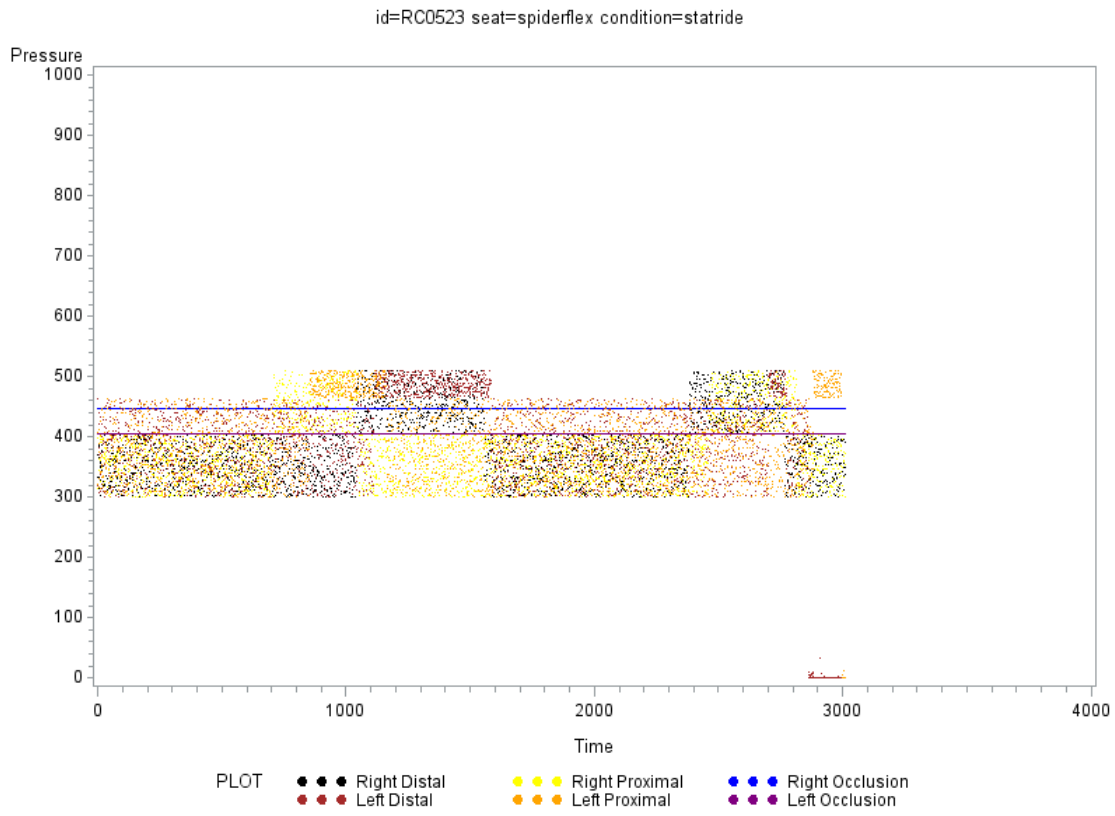



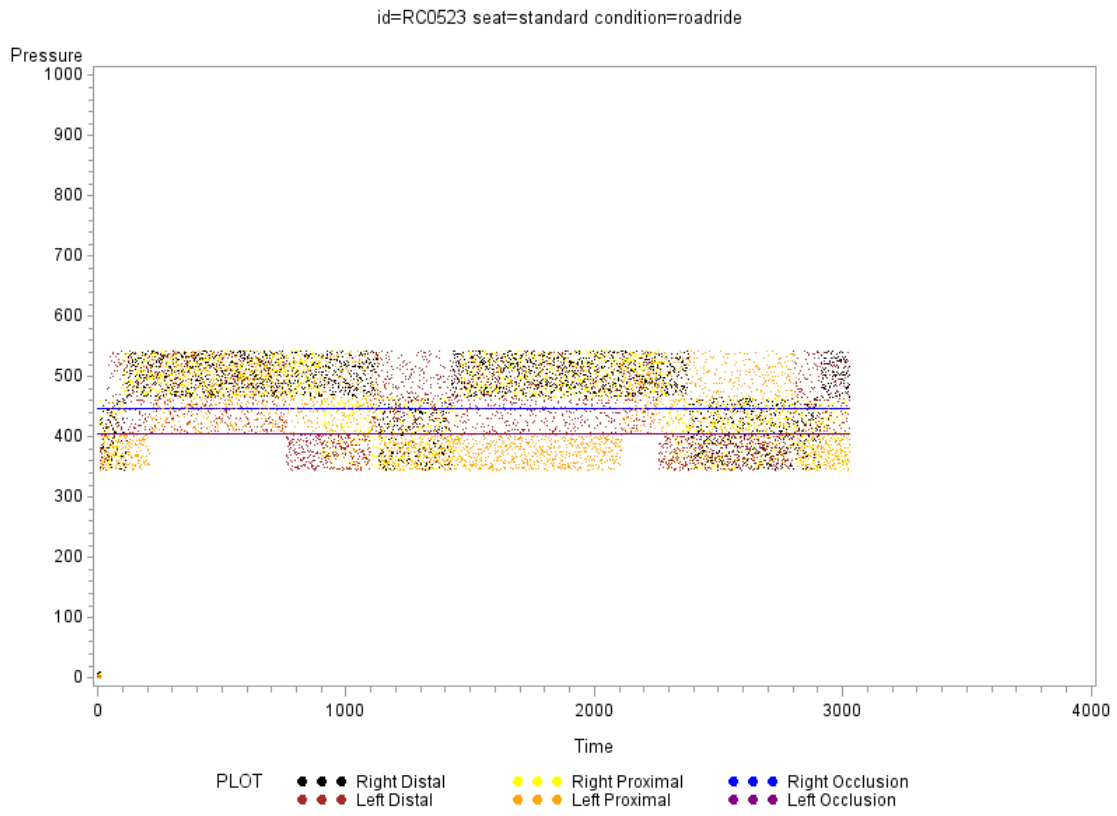

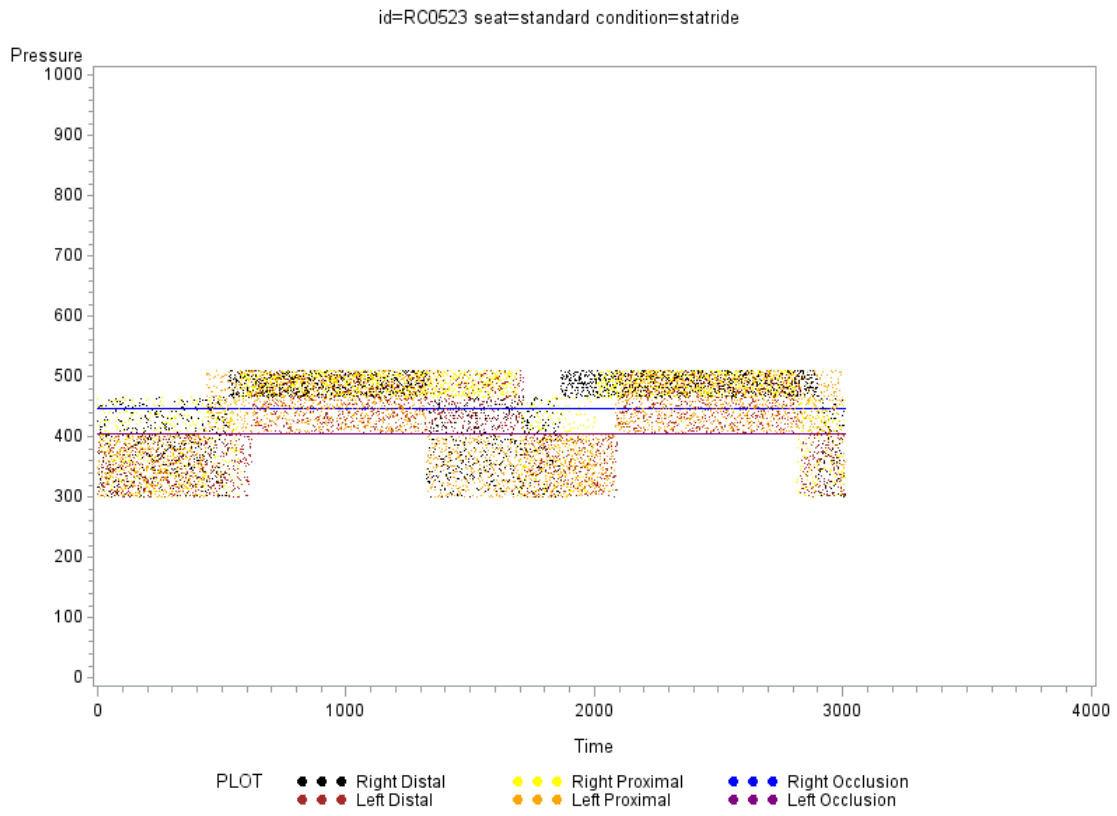

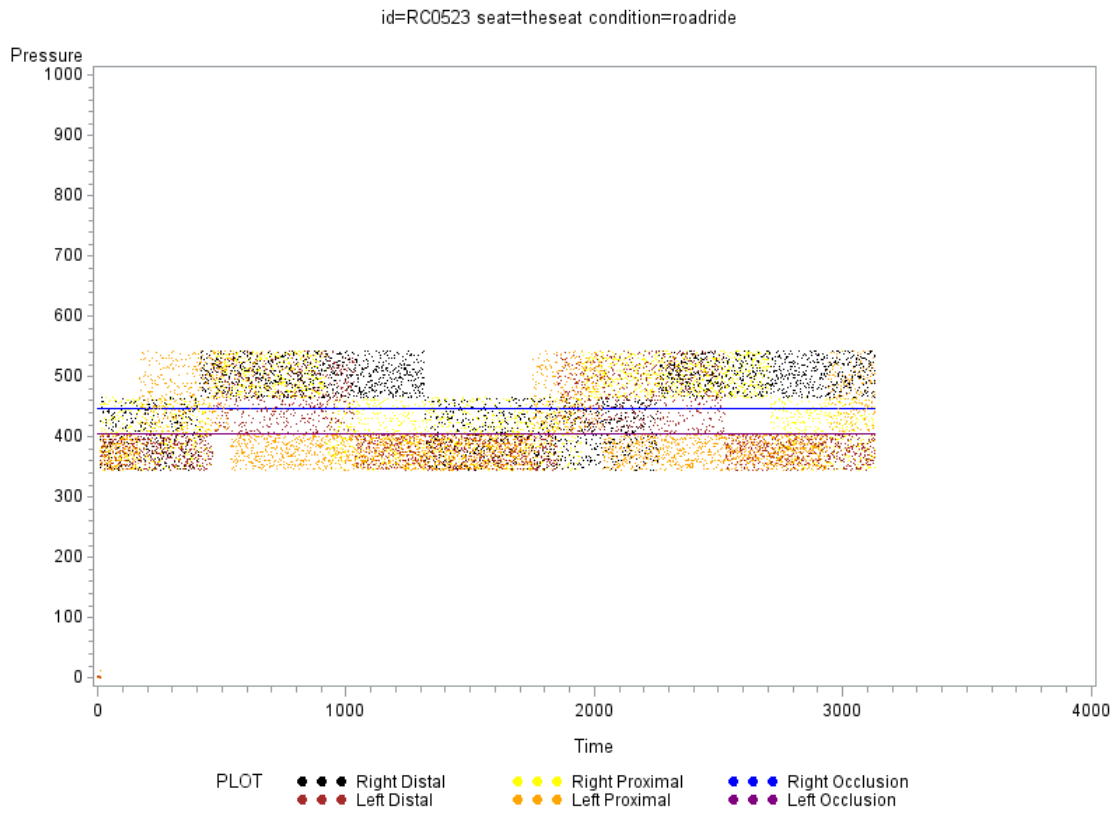

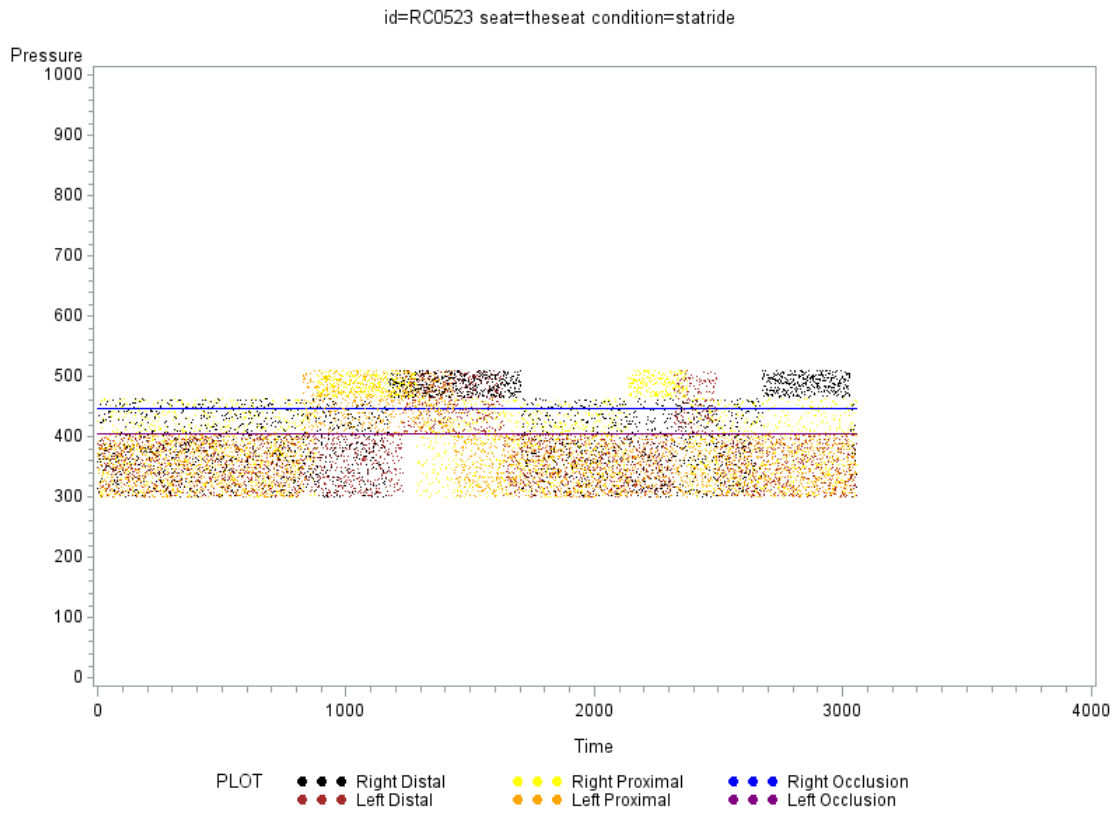

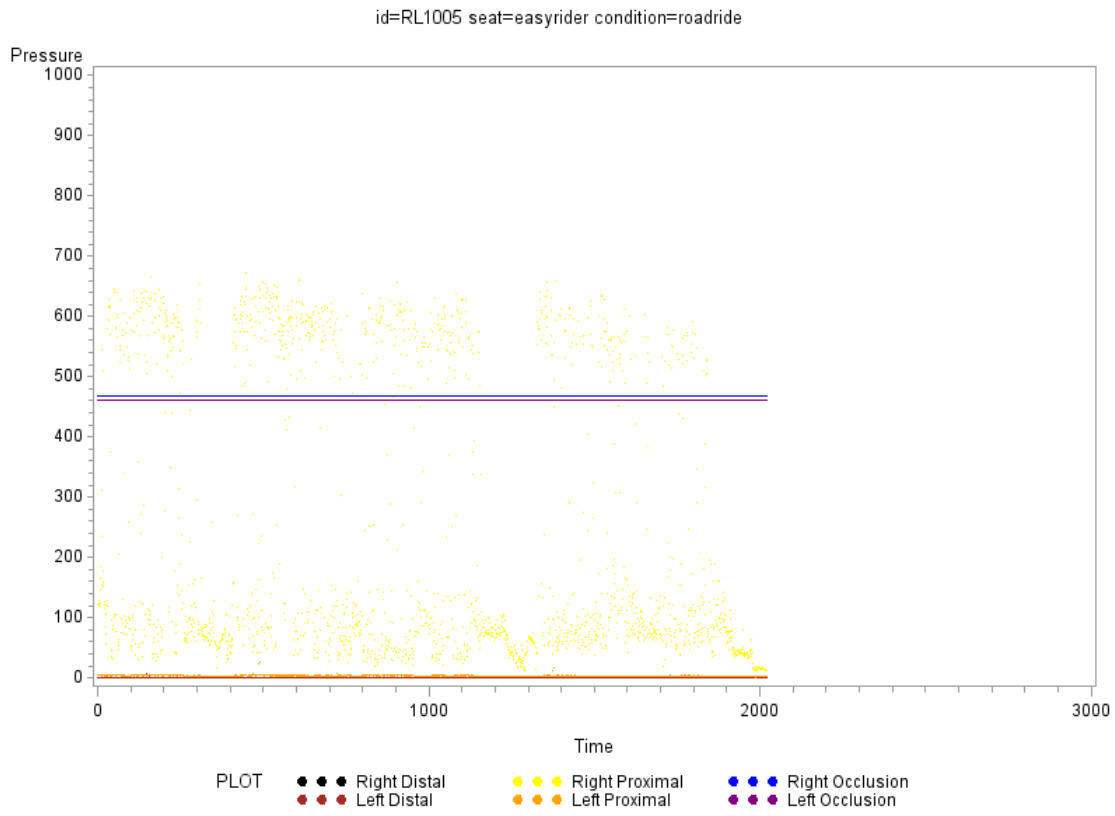

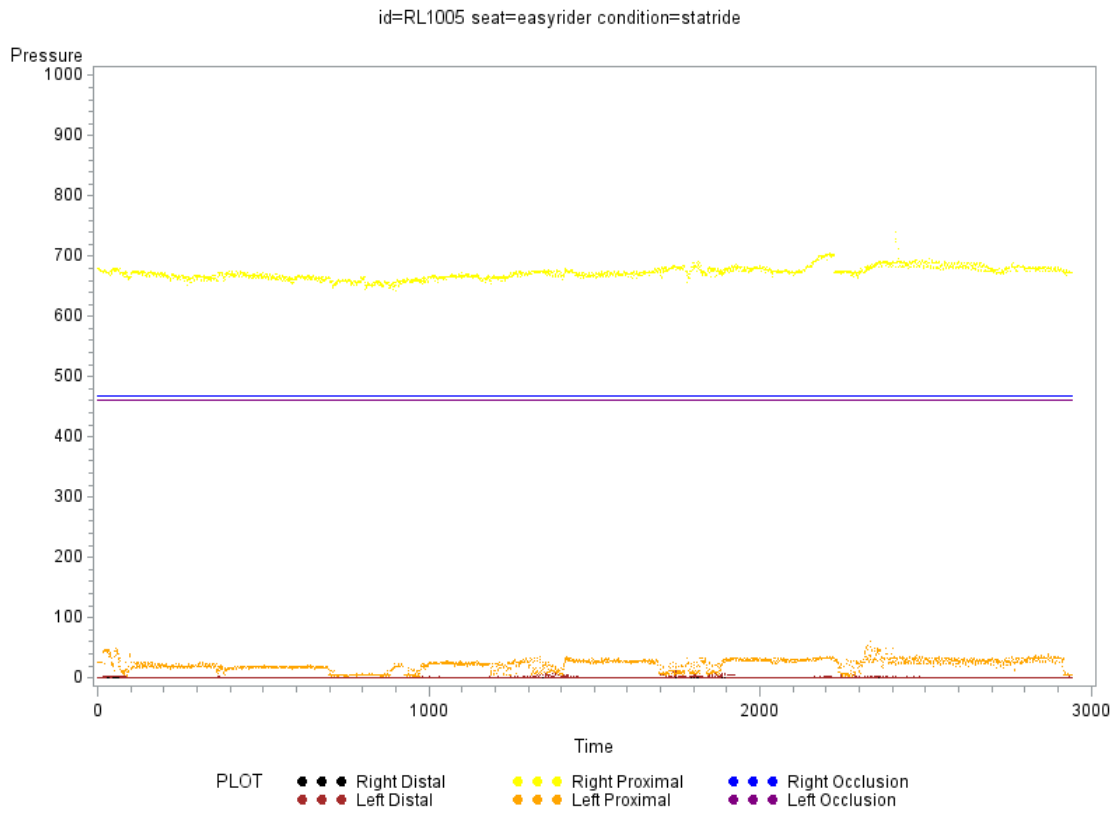

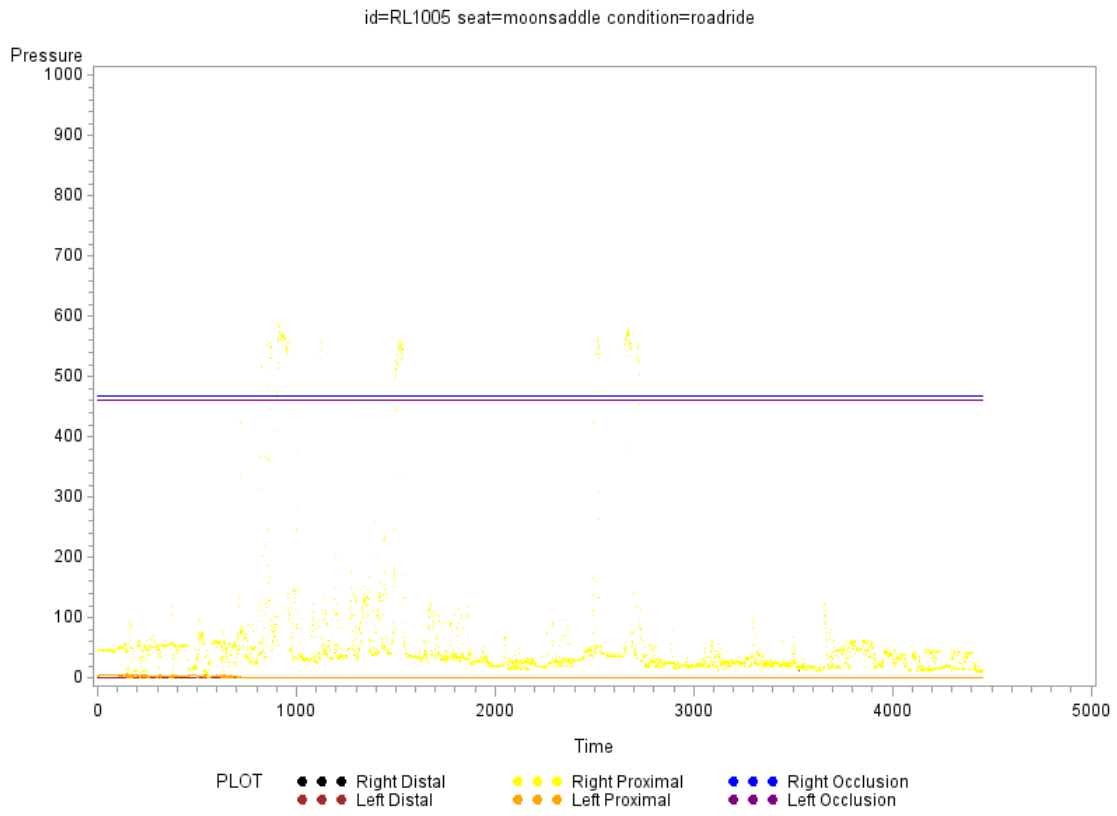

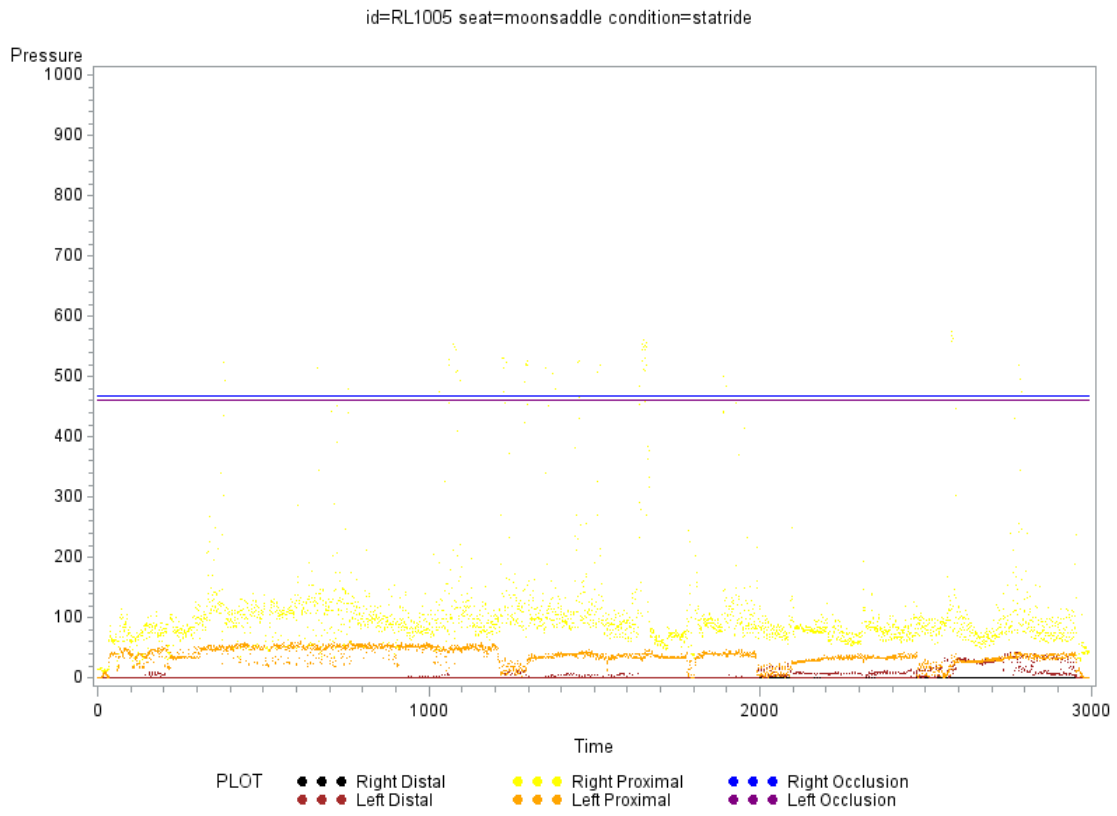



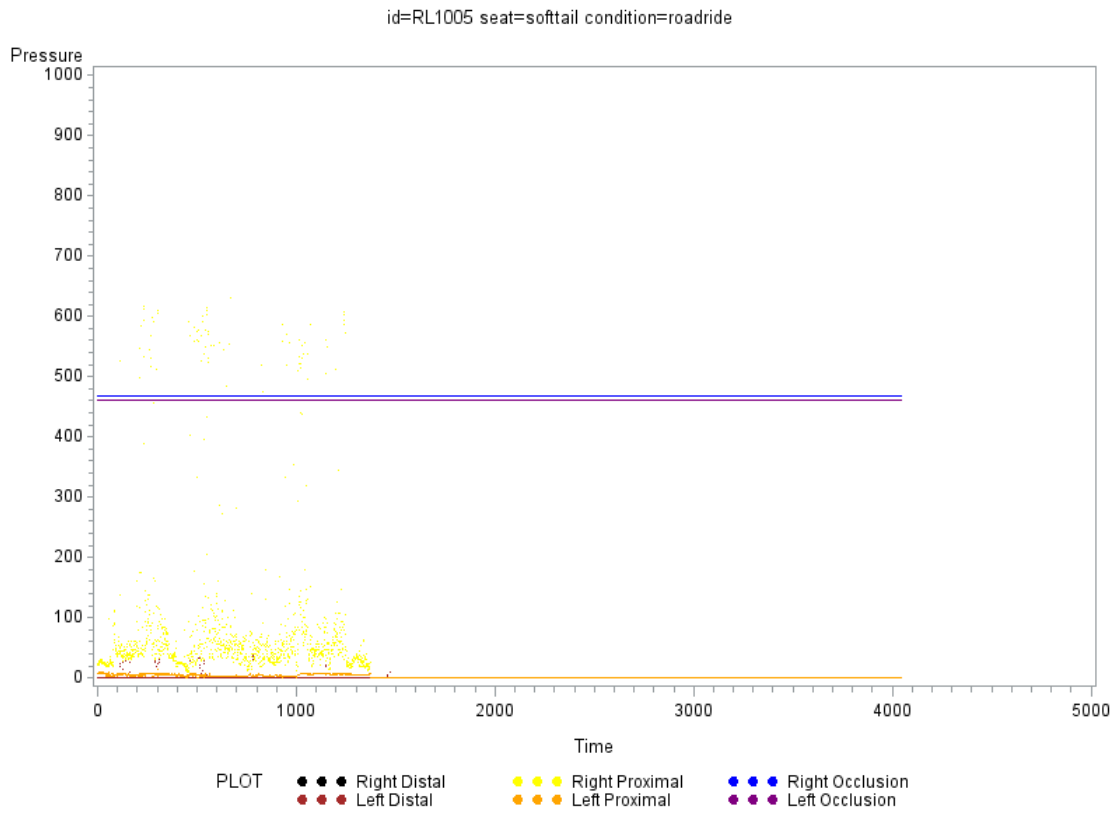

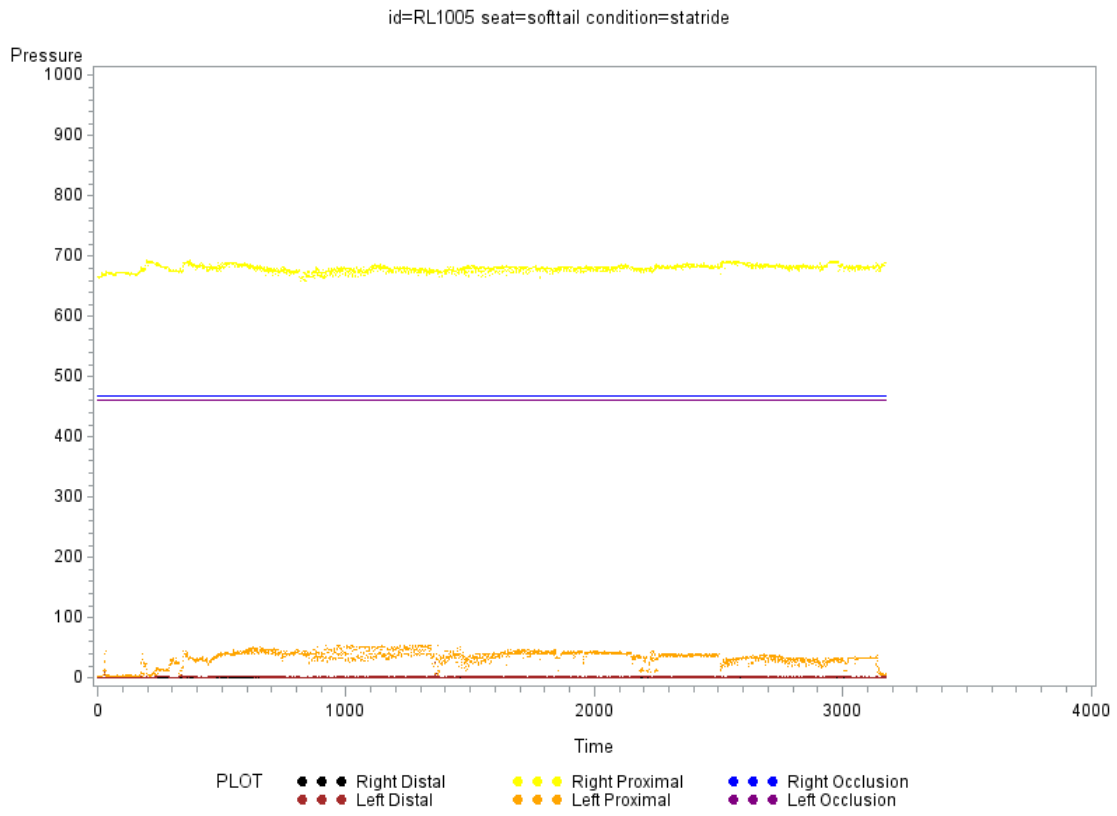

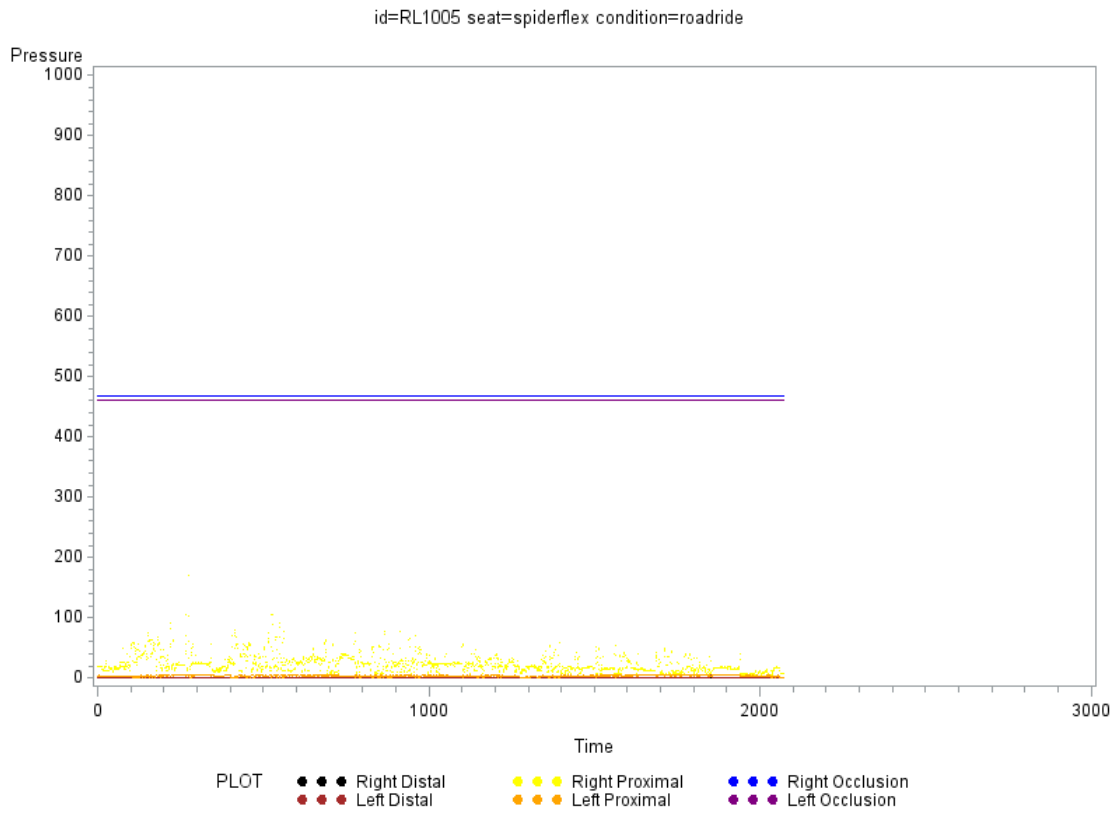

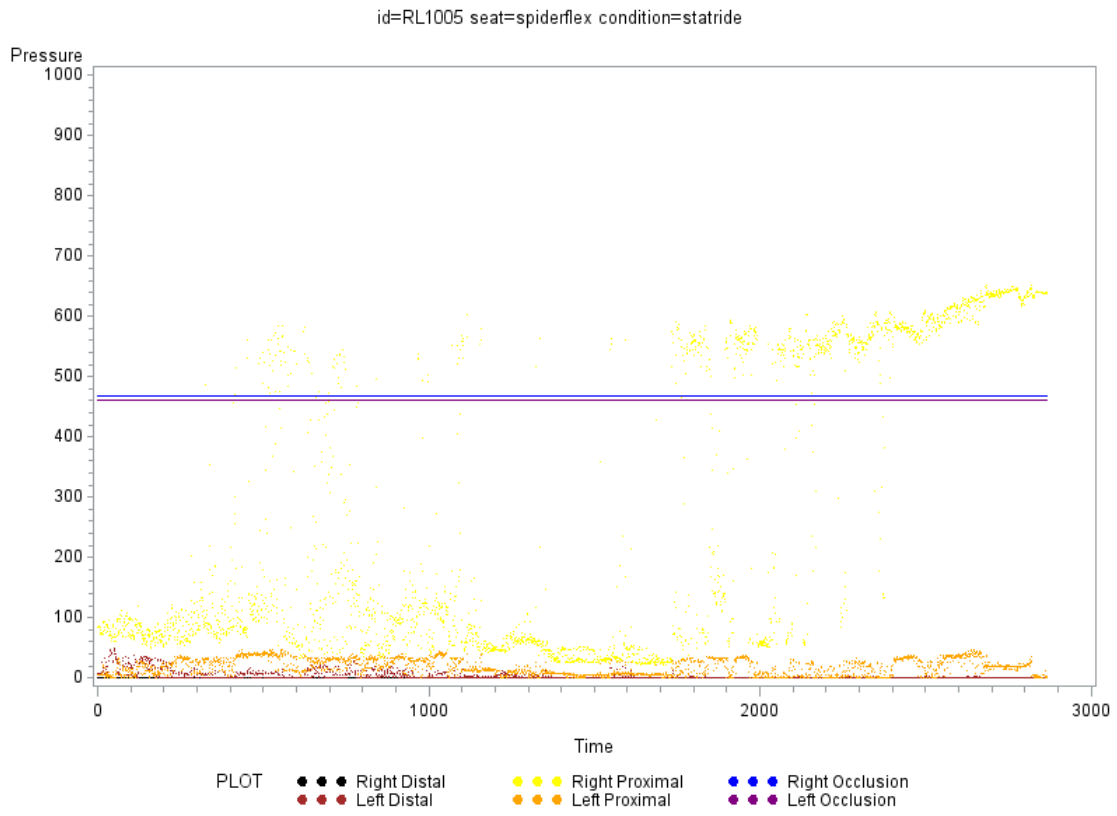

id=RL1005 seat=standard condition=roadride

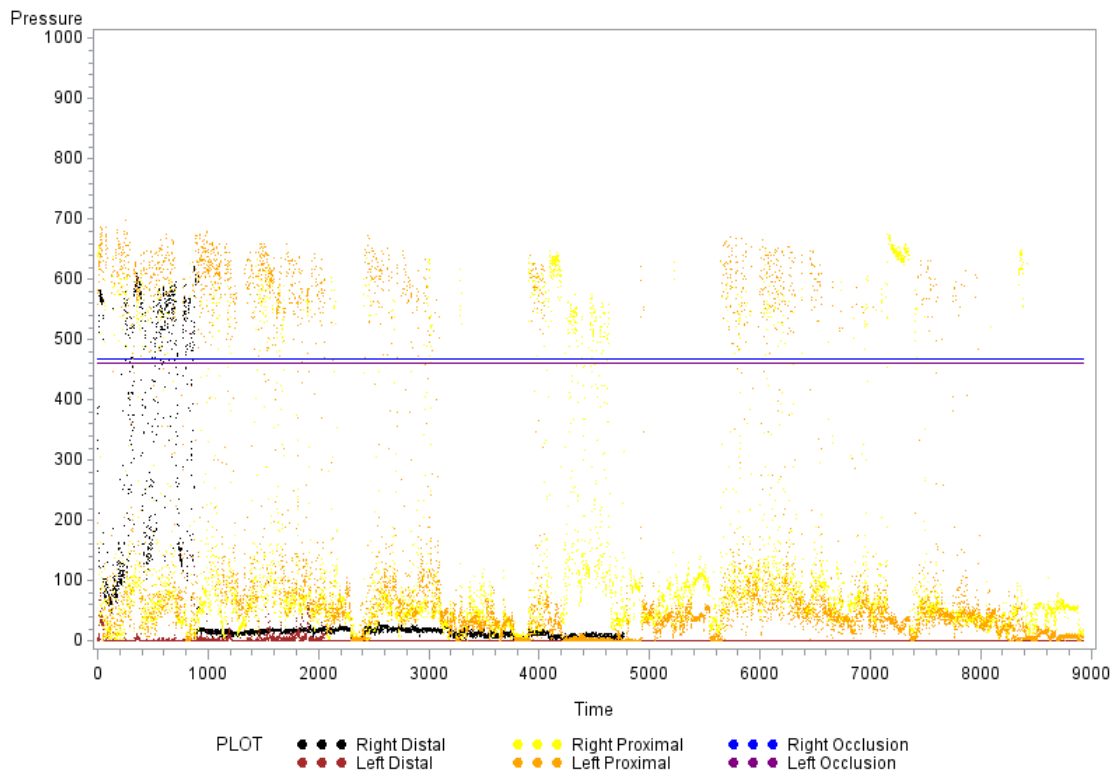

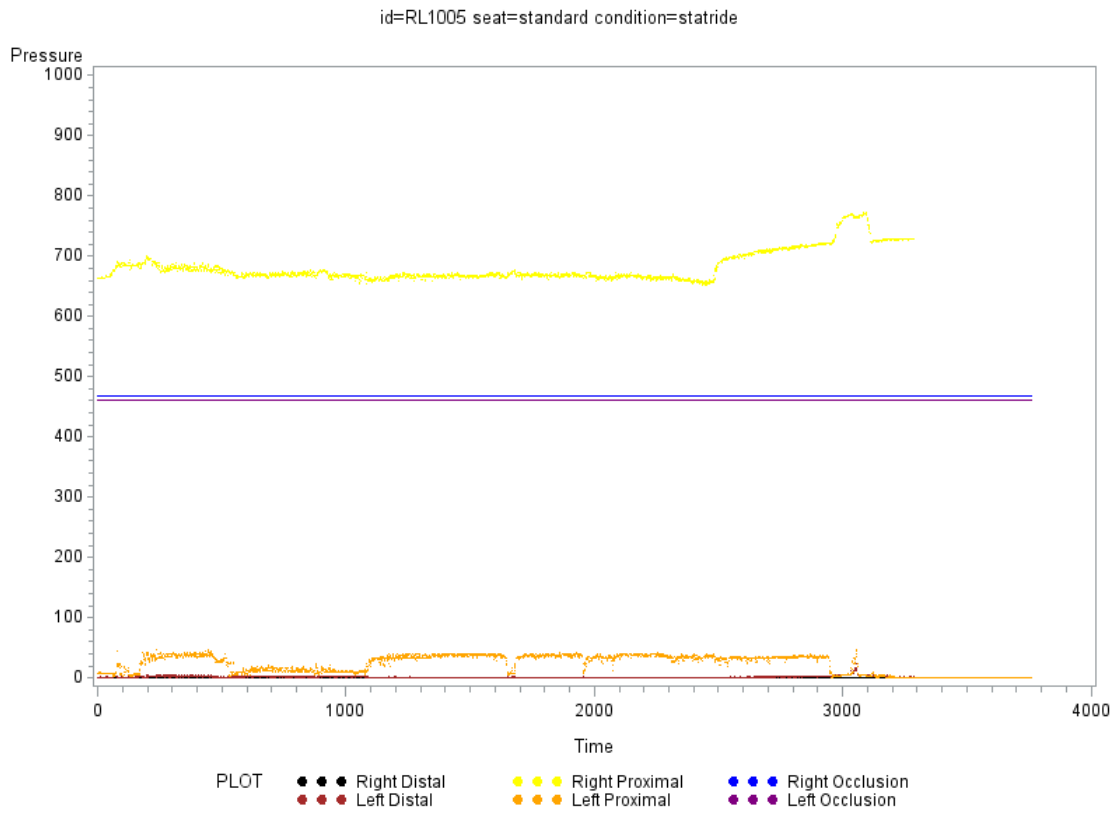

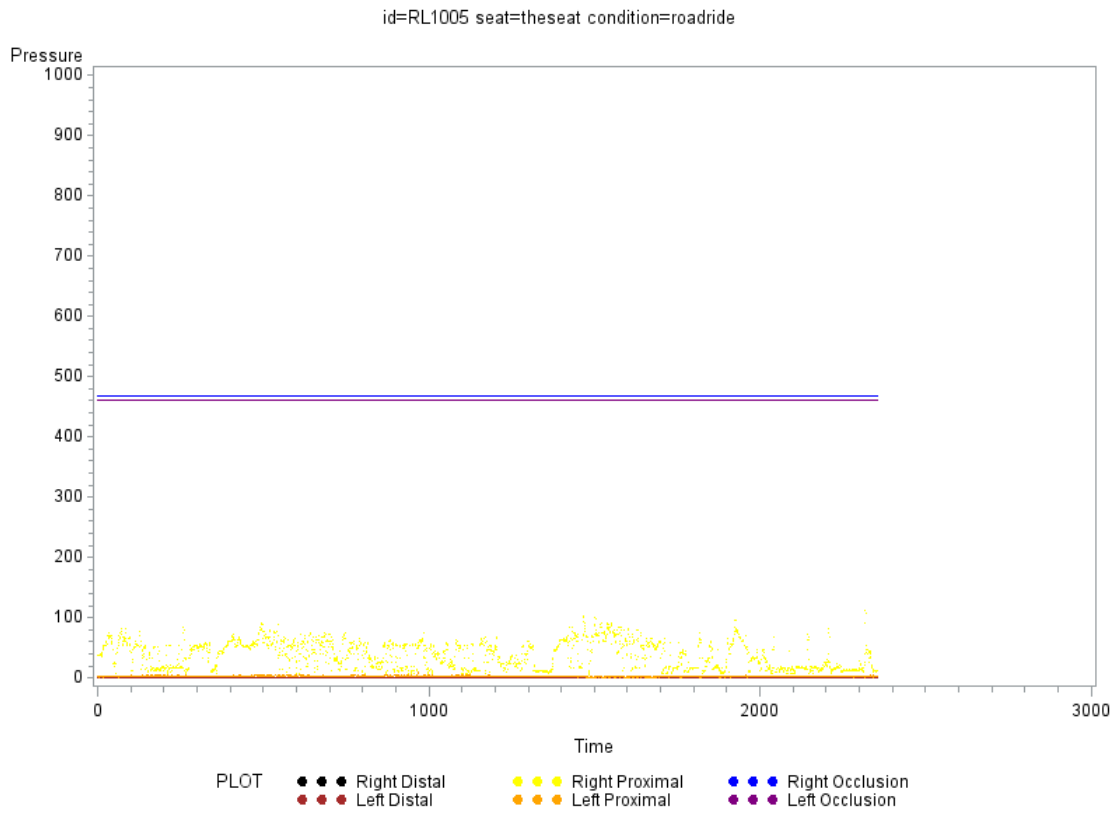

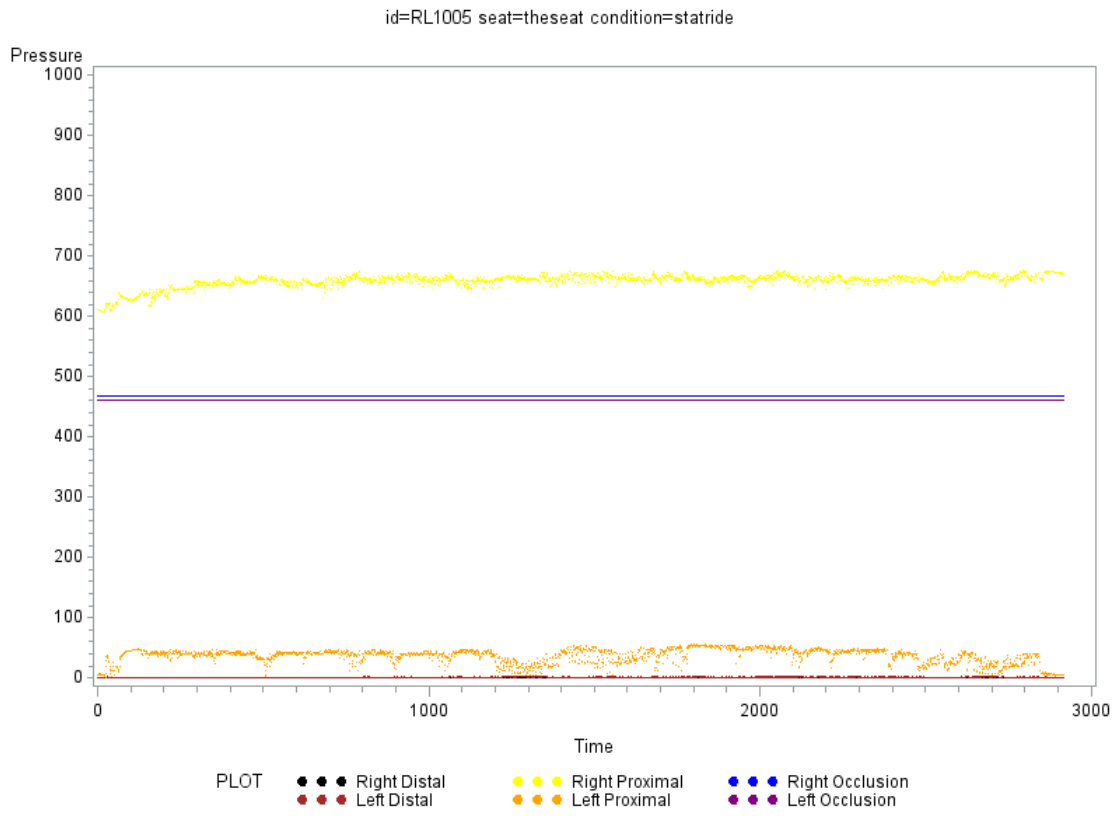



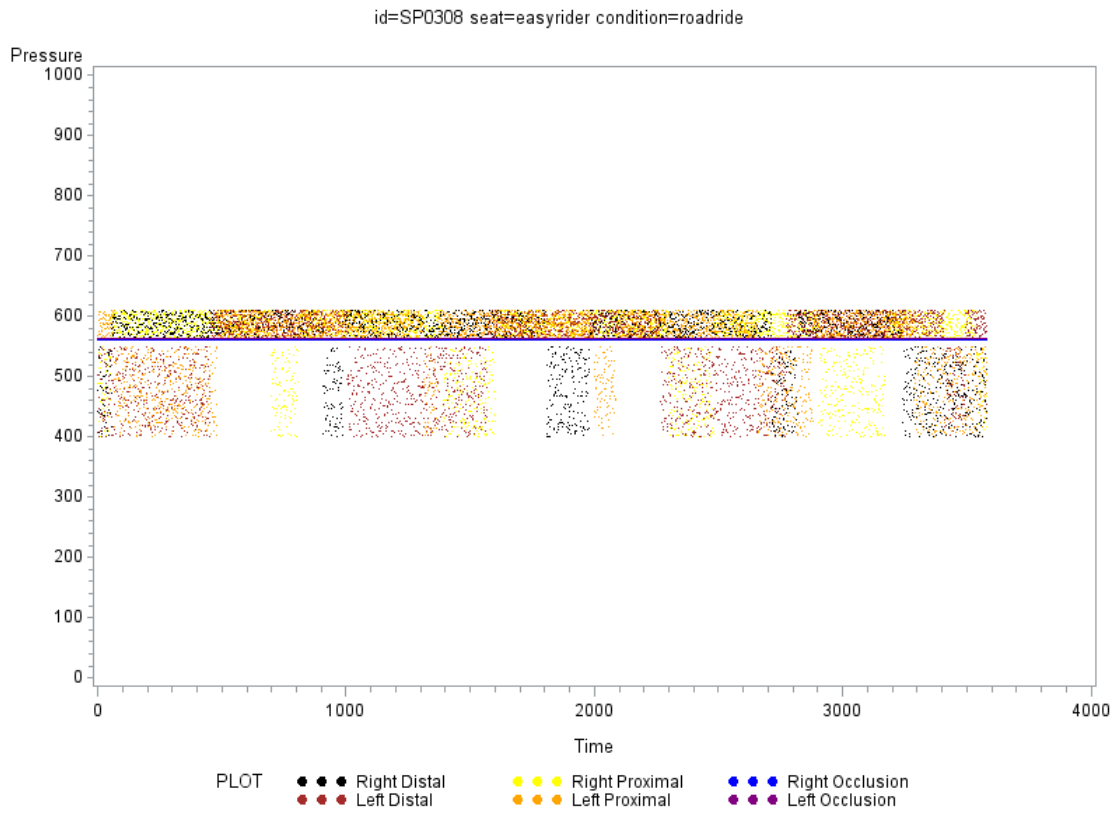

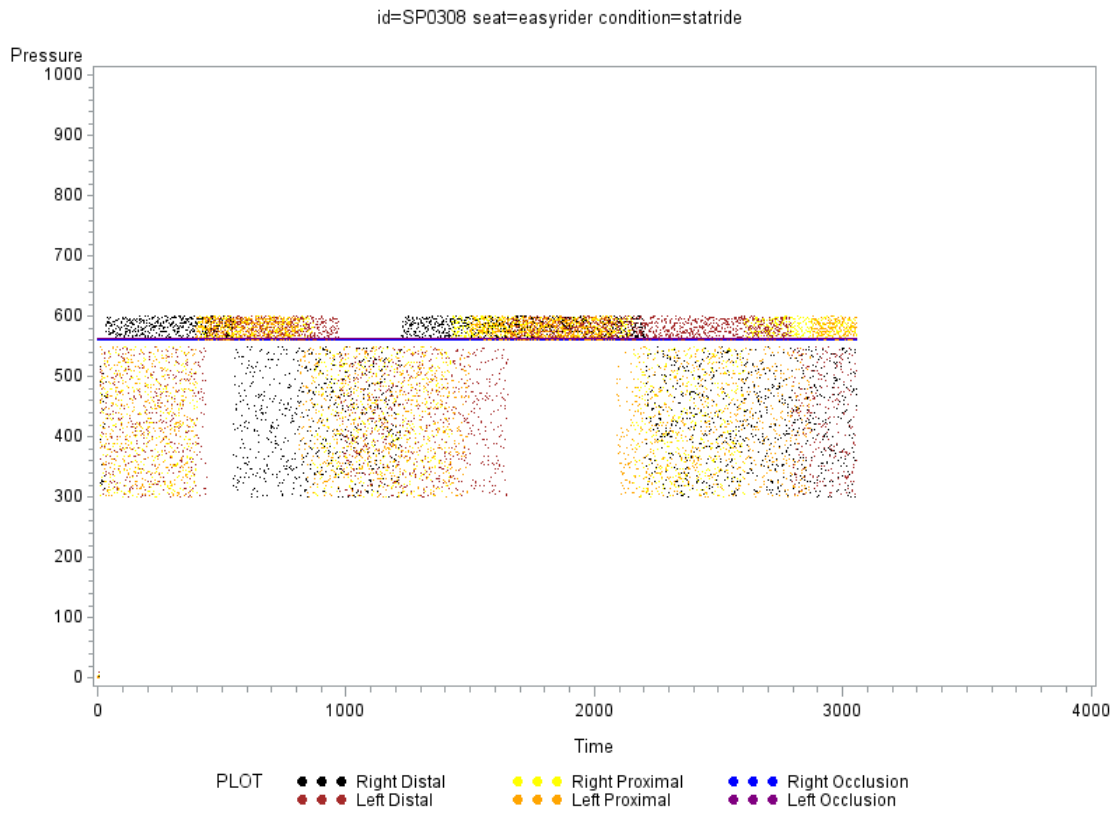

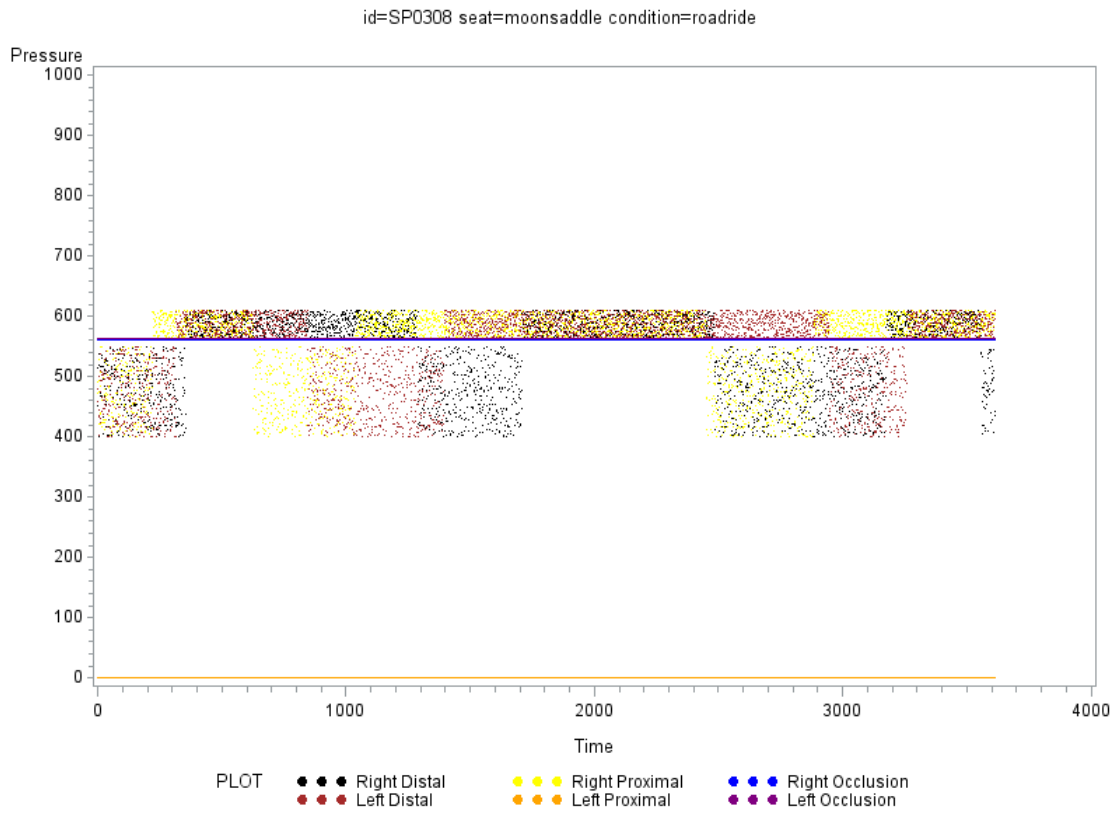

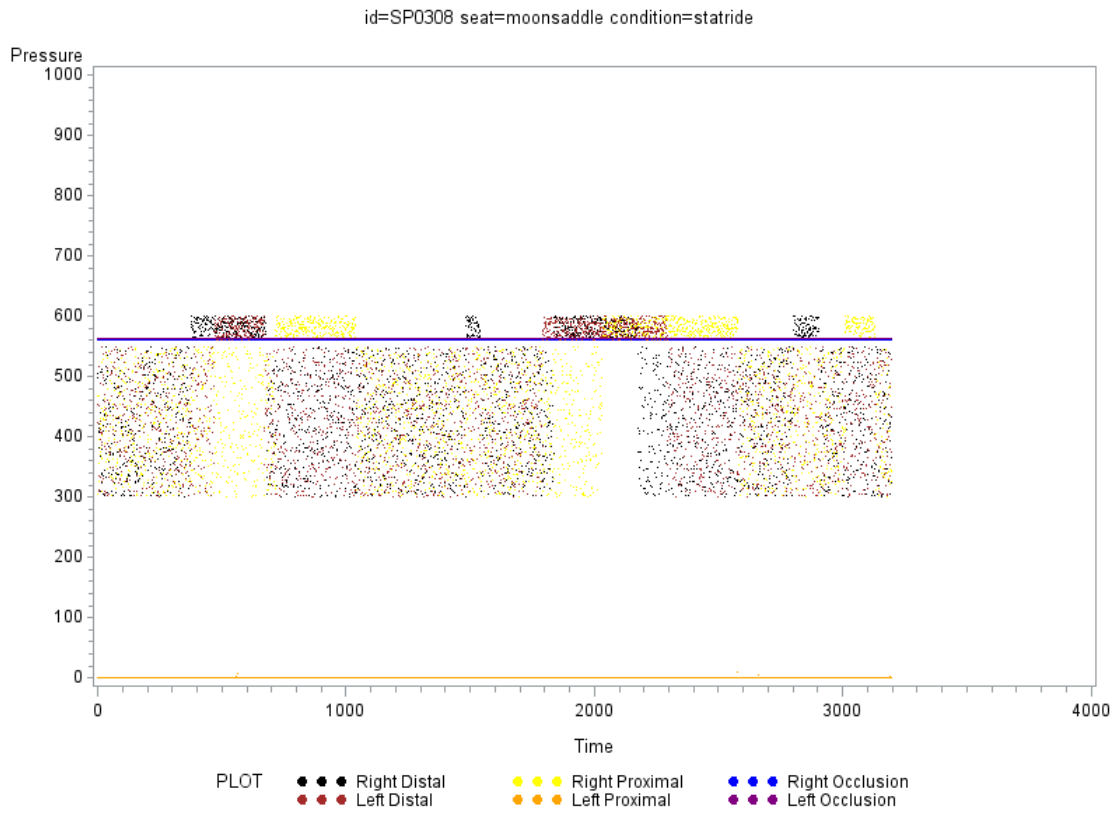

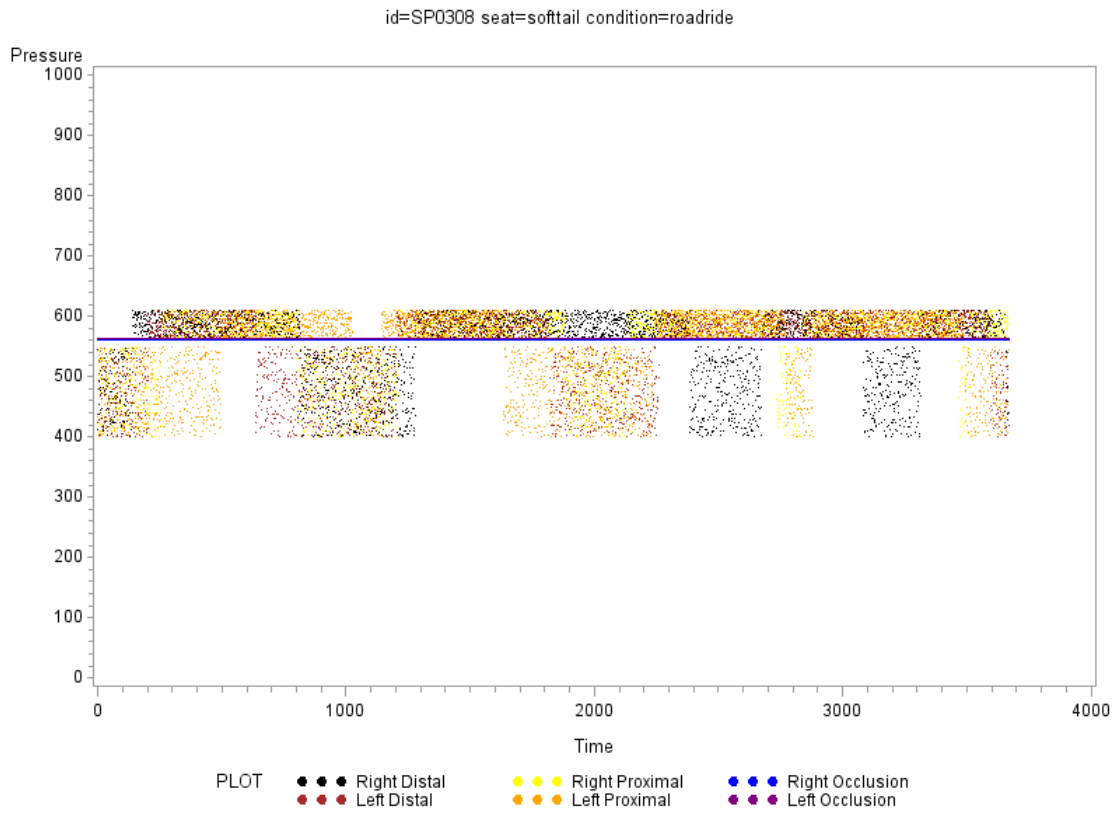

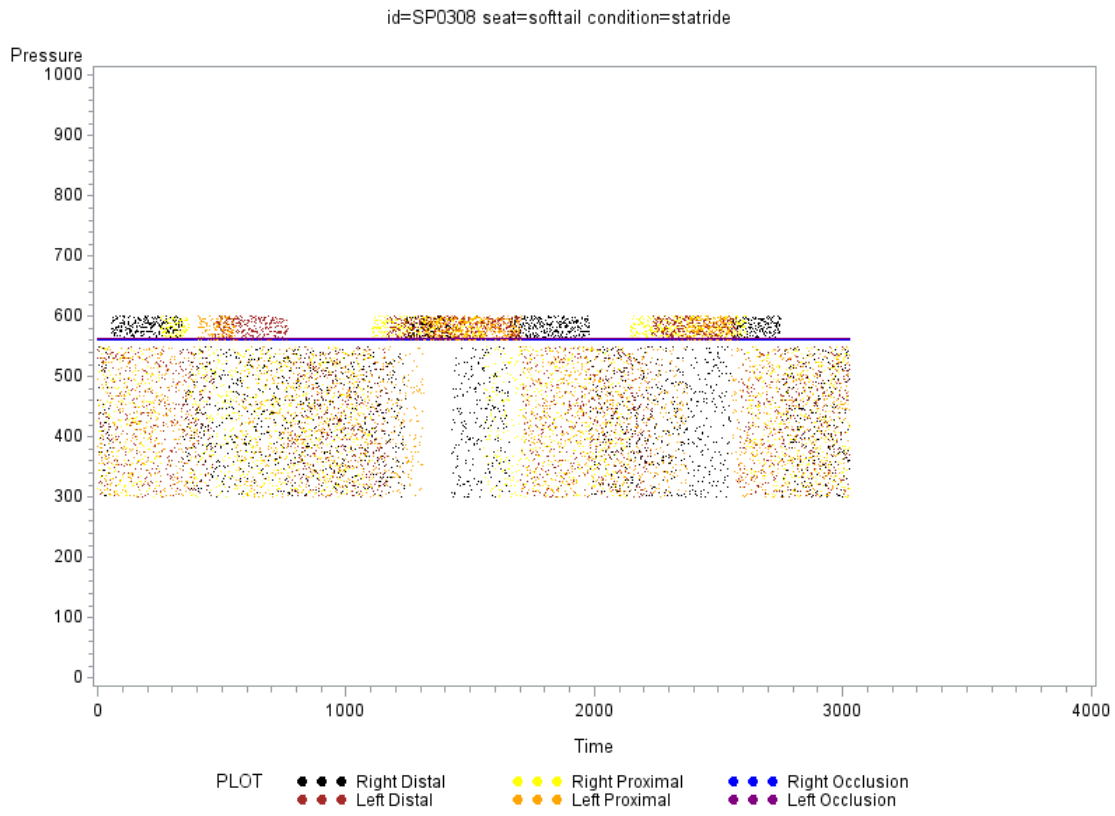

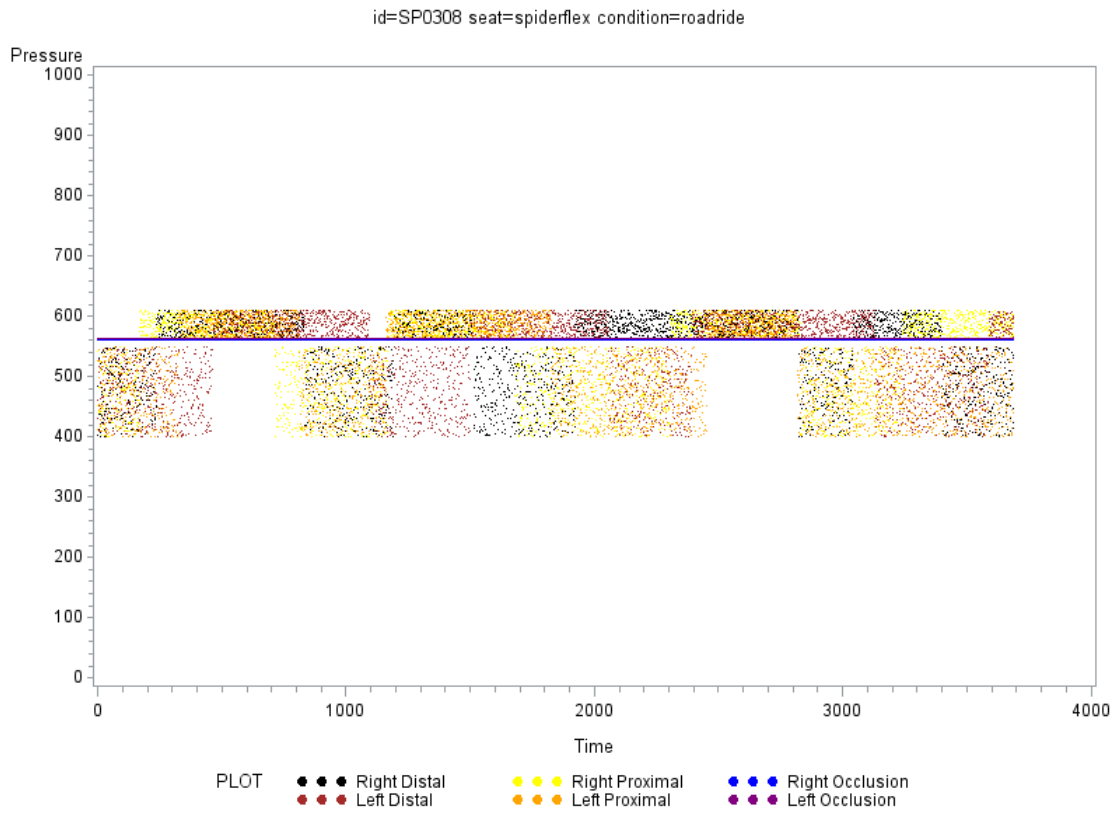

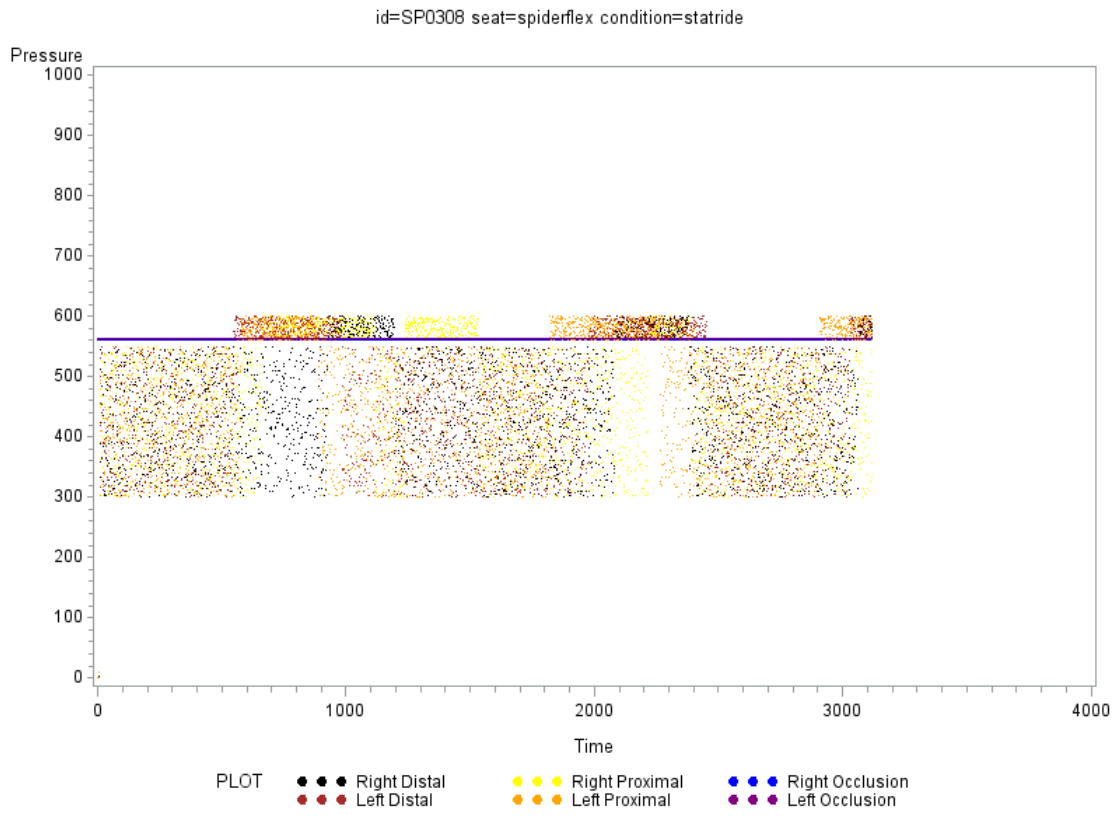



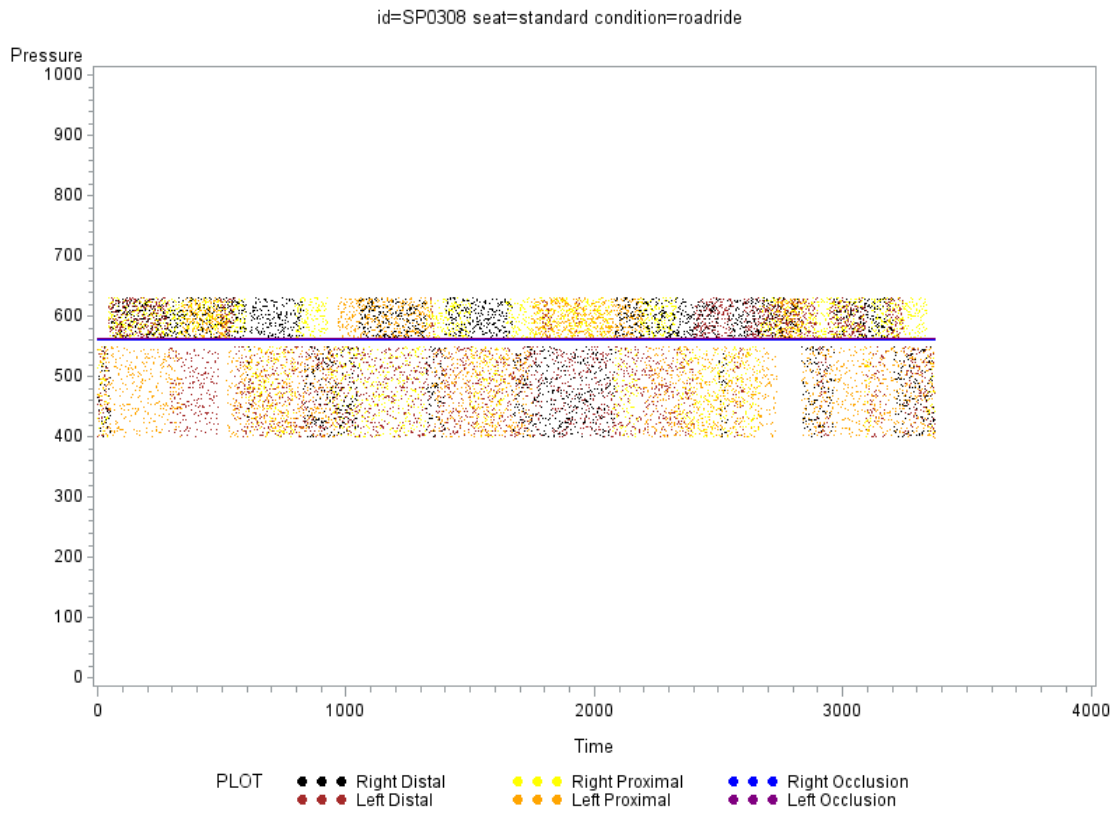

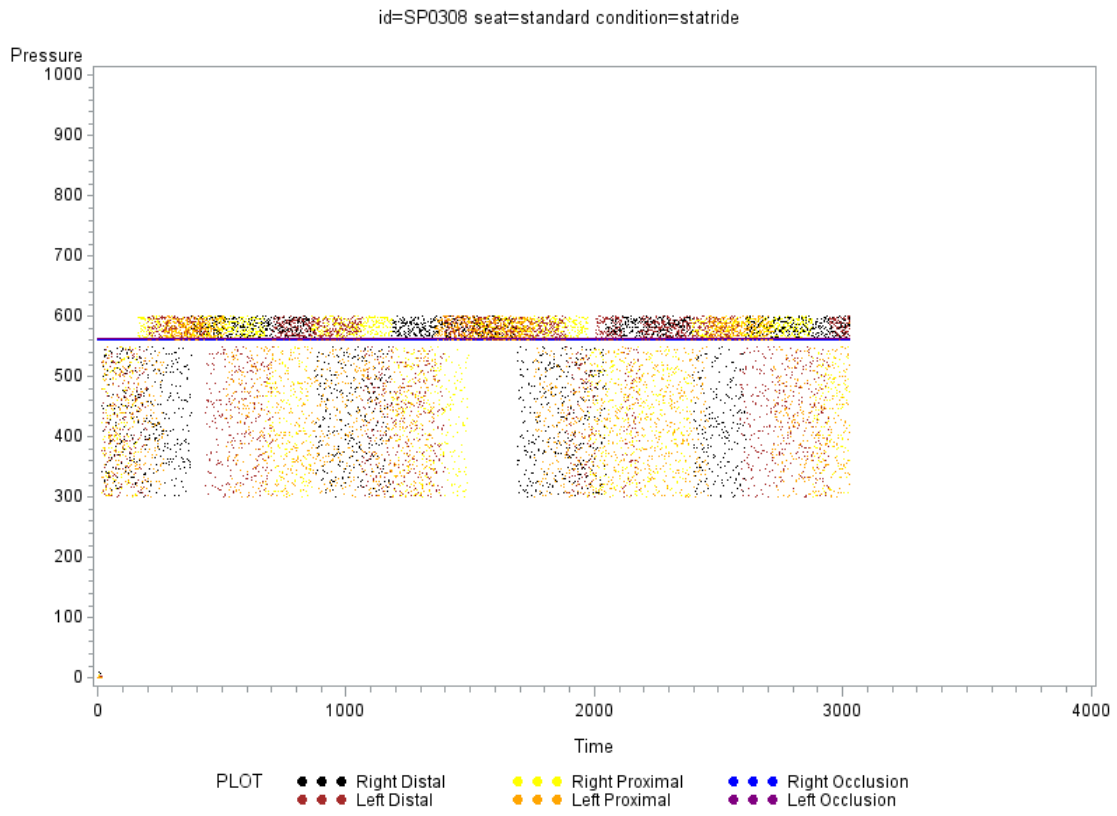

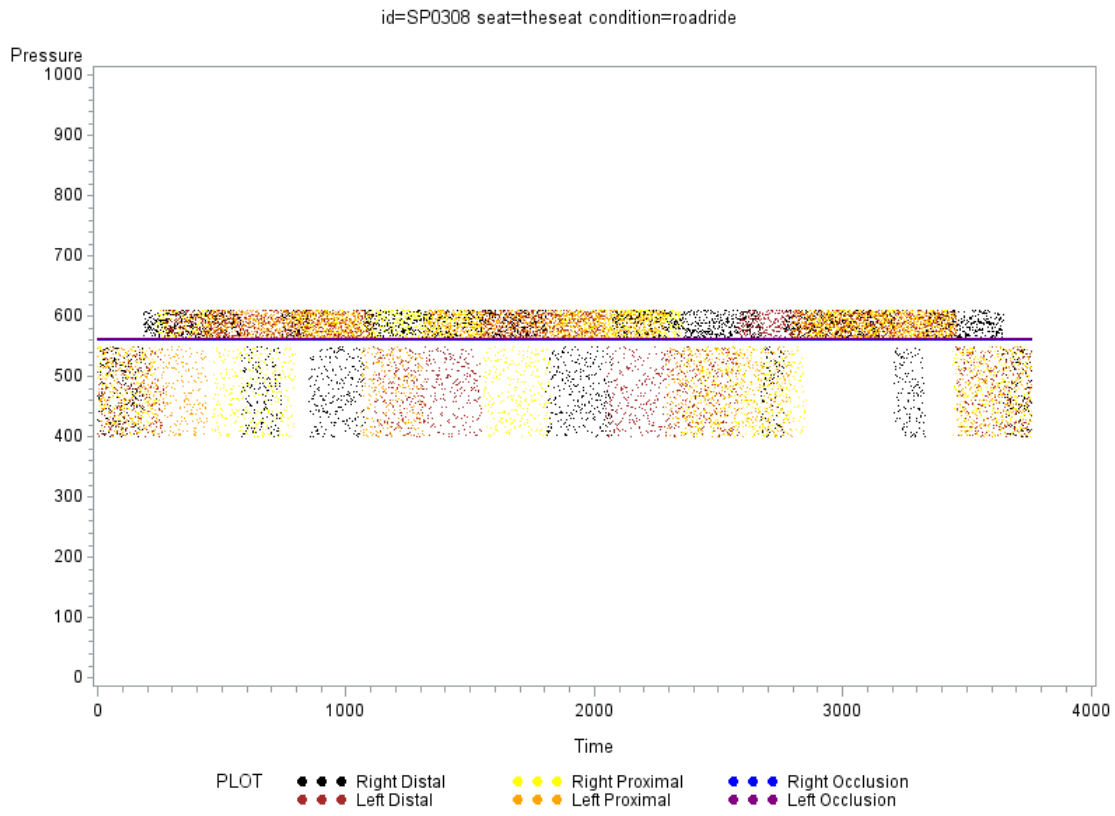

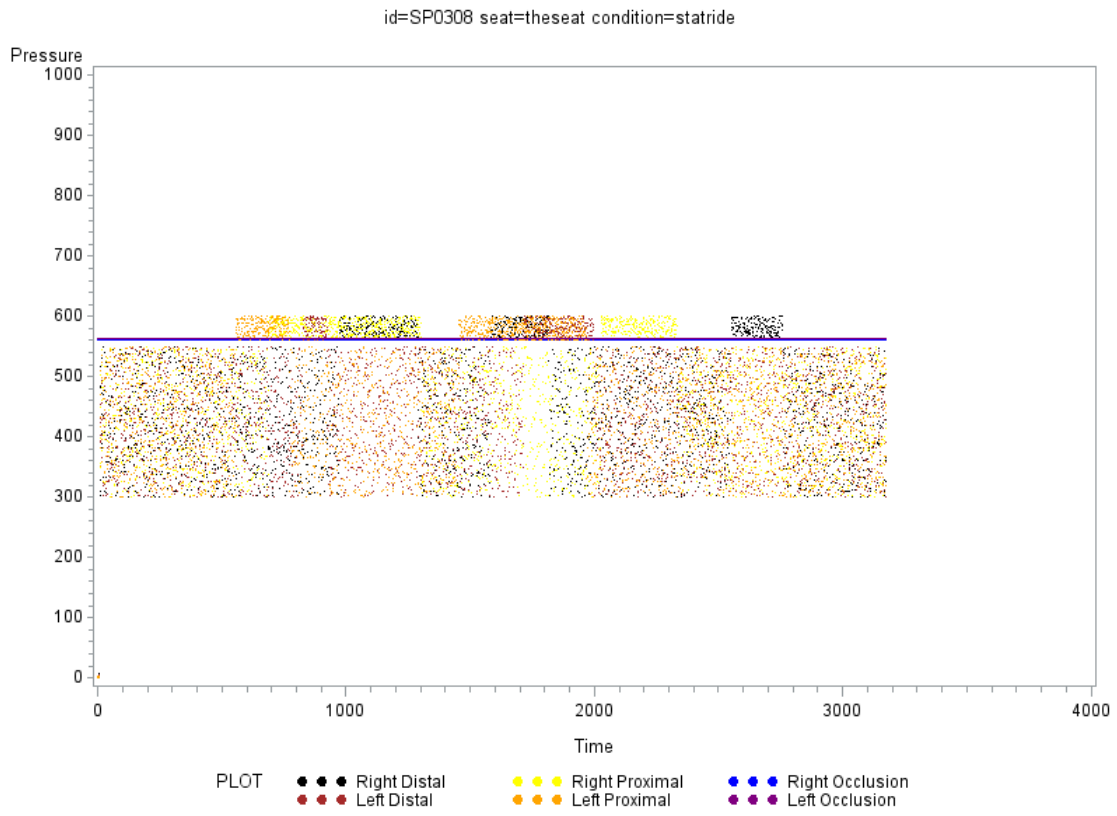

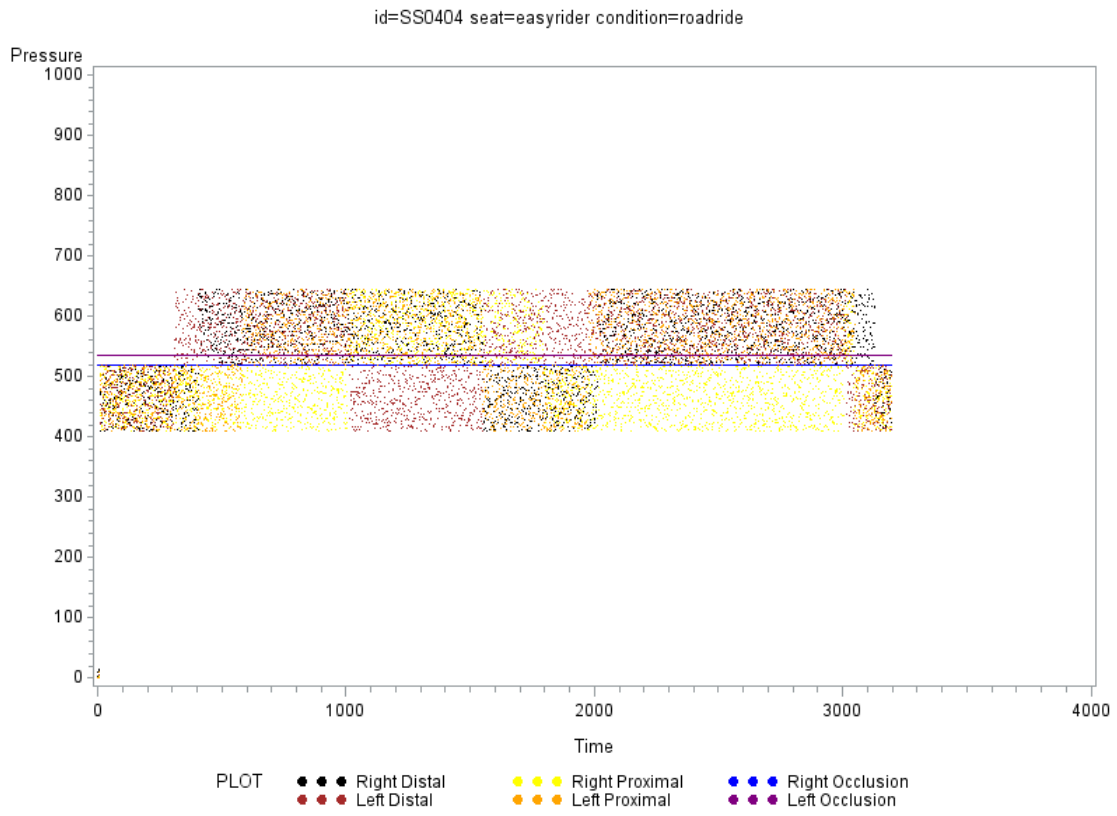

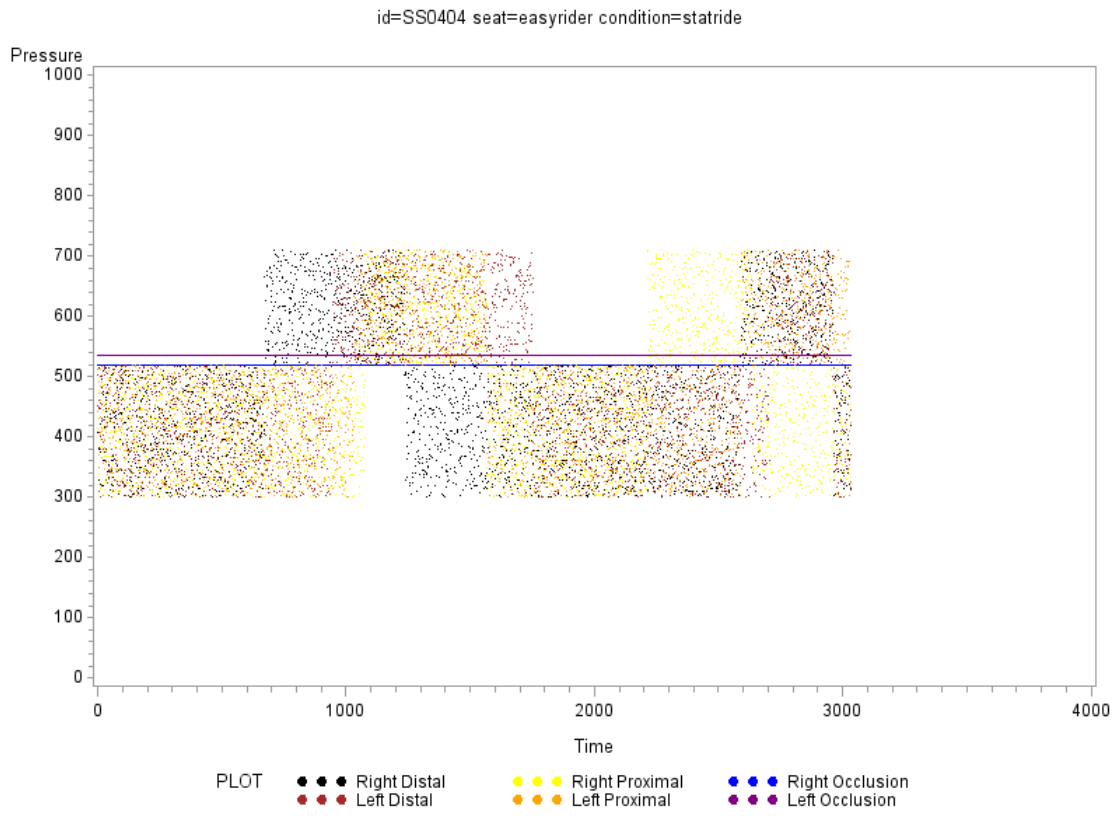

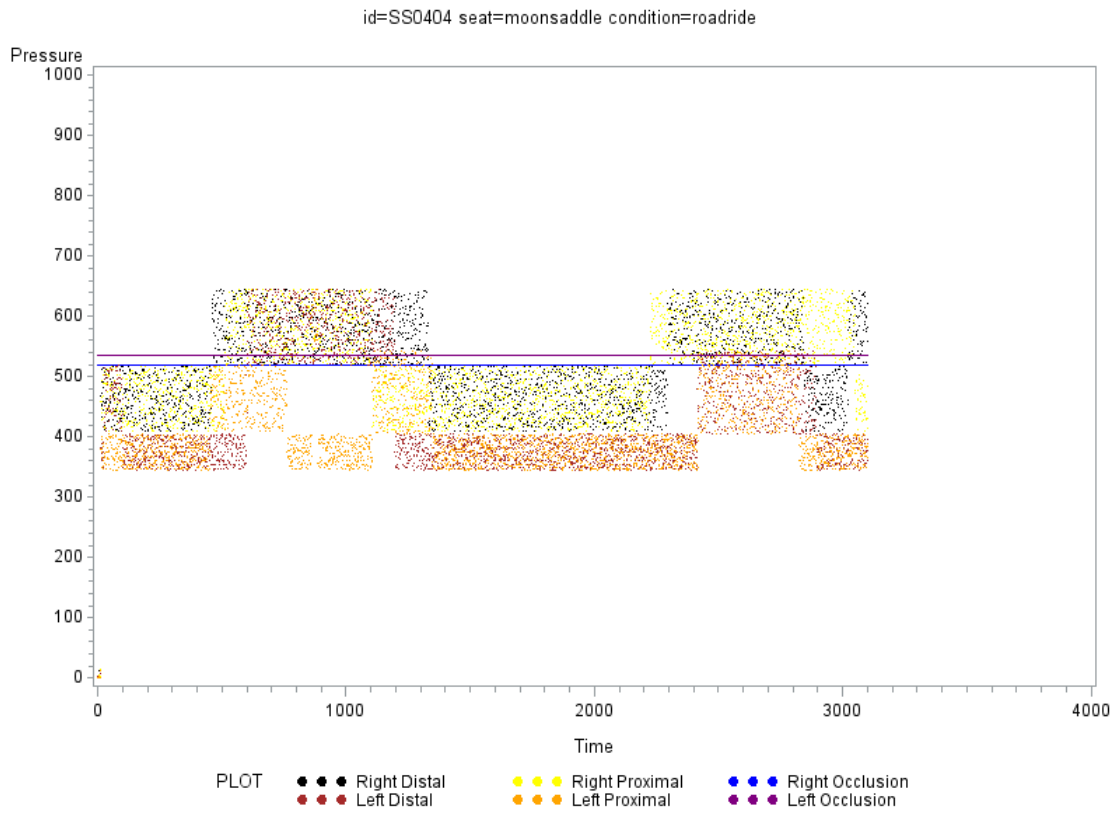

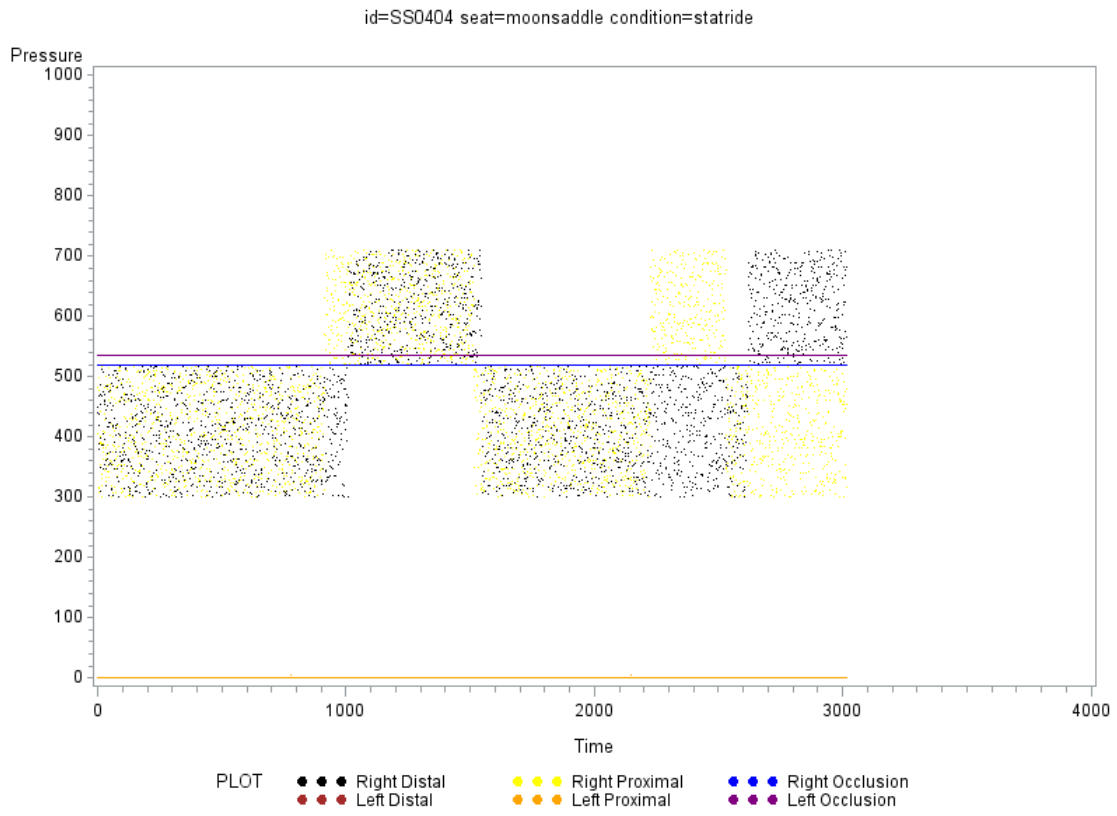



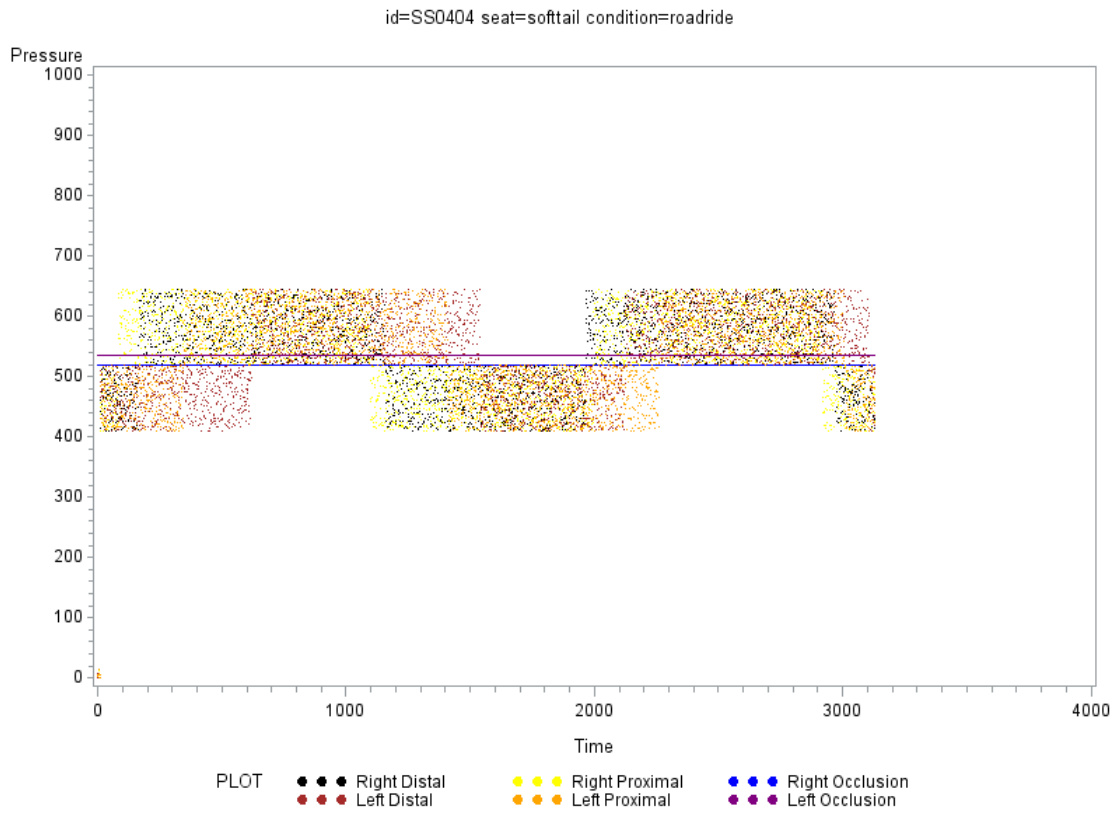

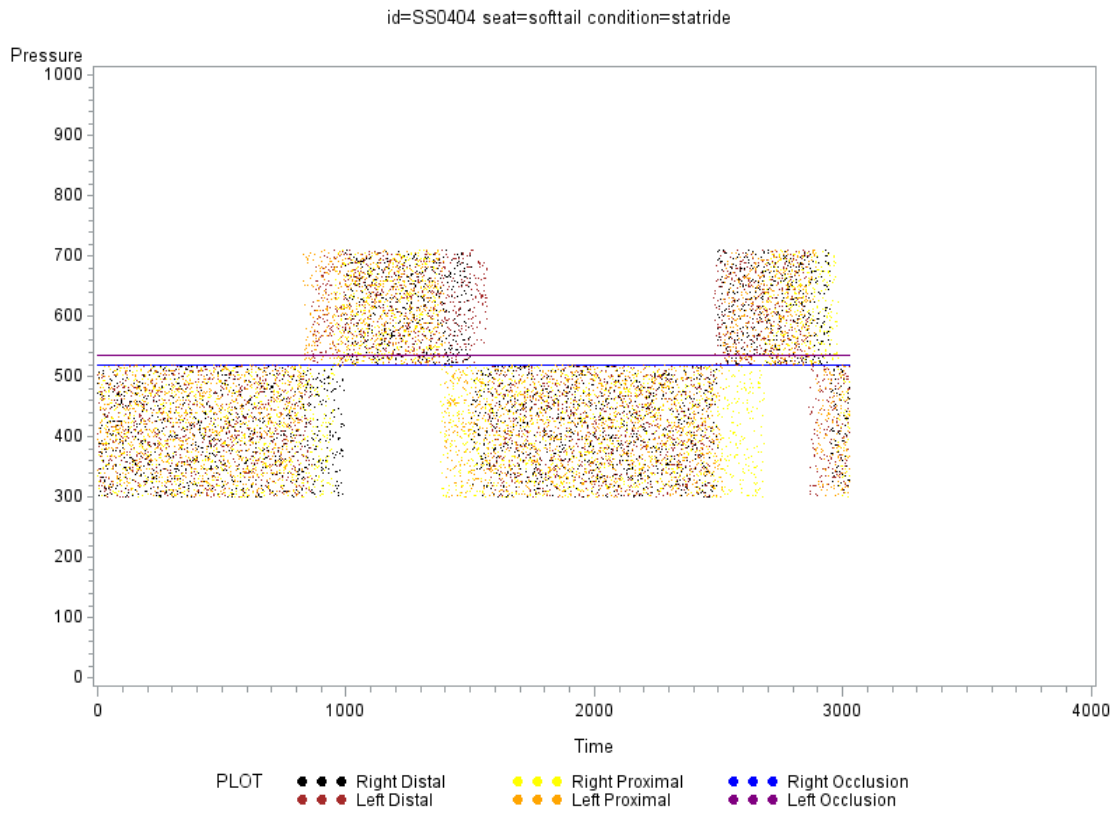

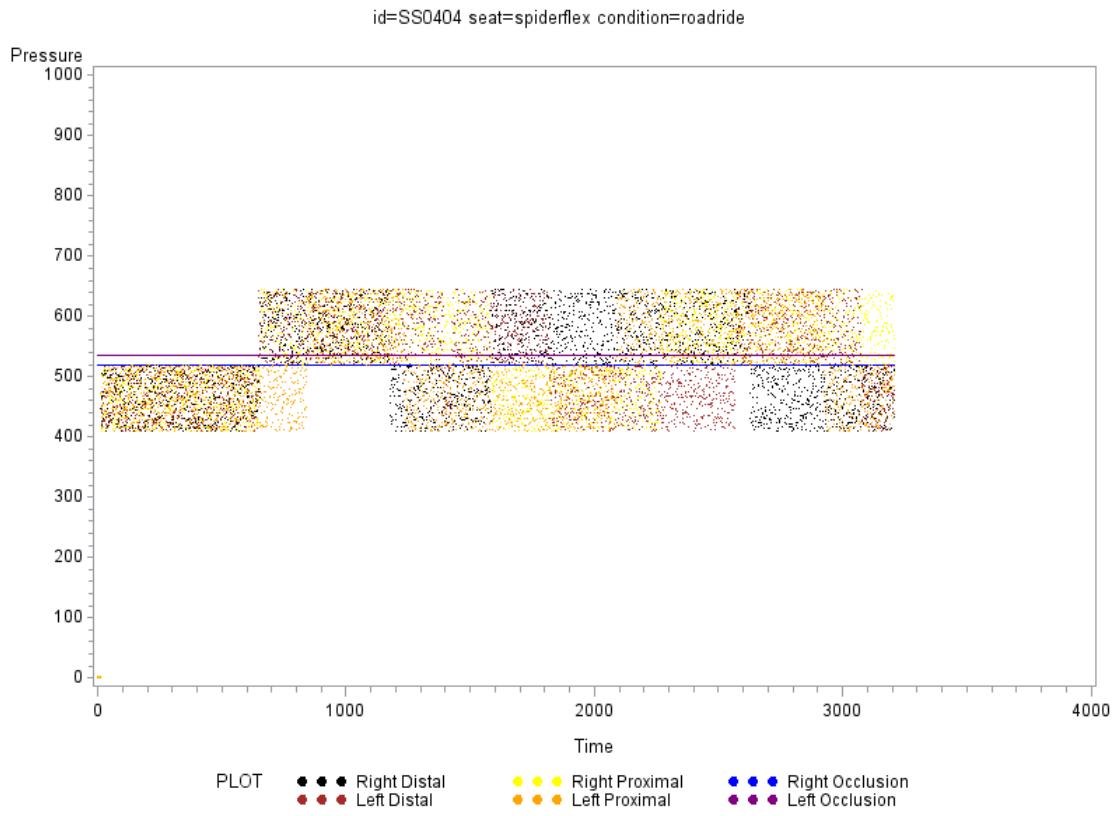

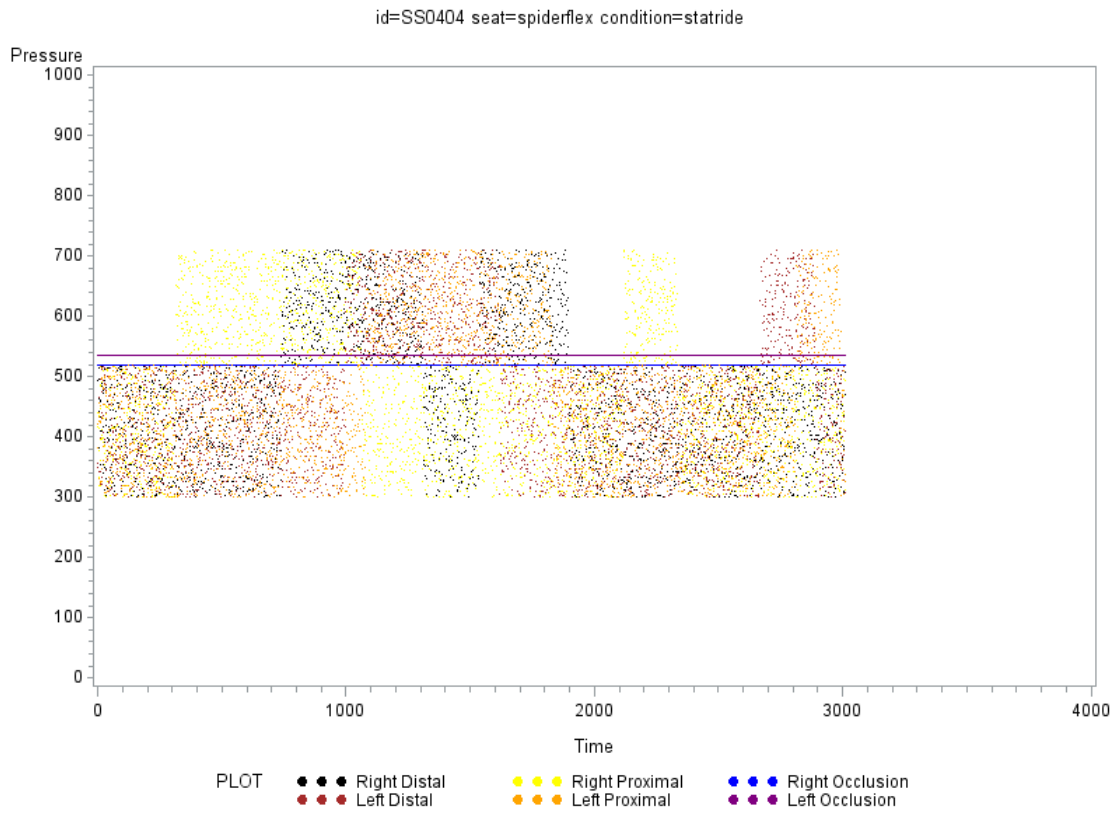

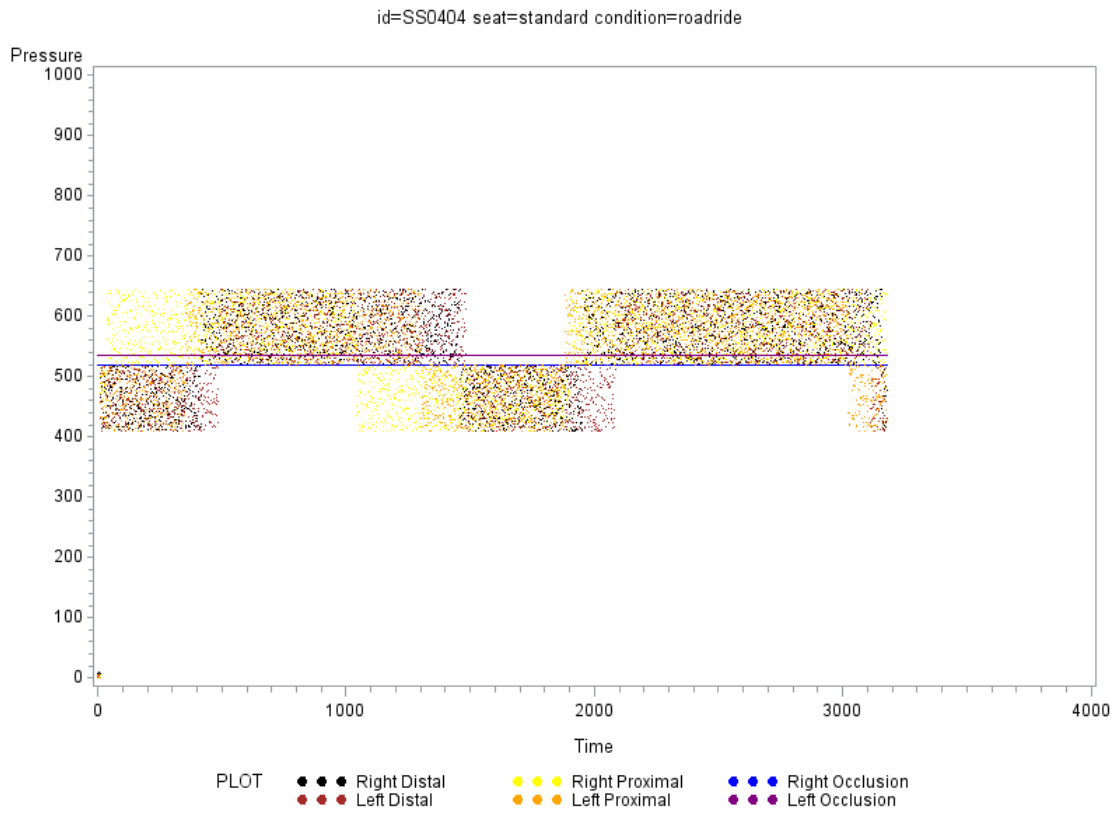

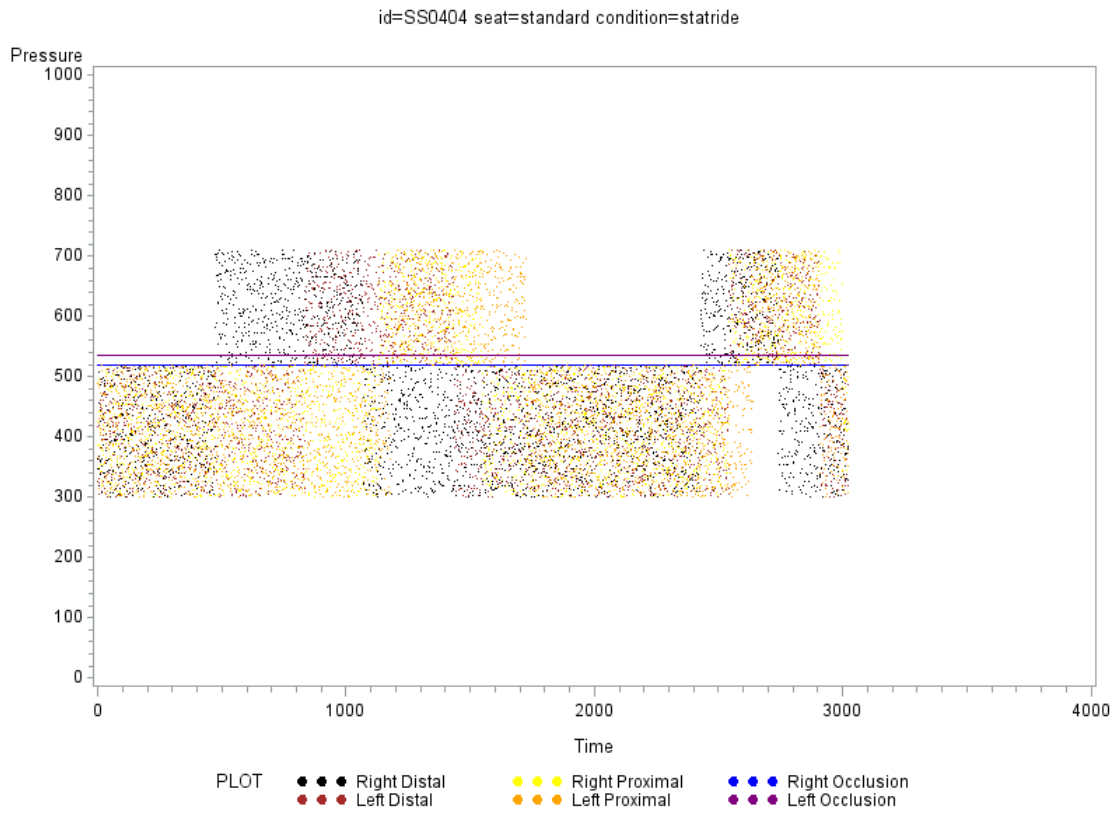

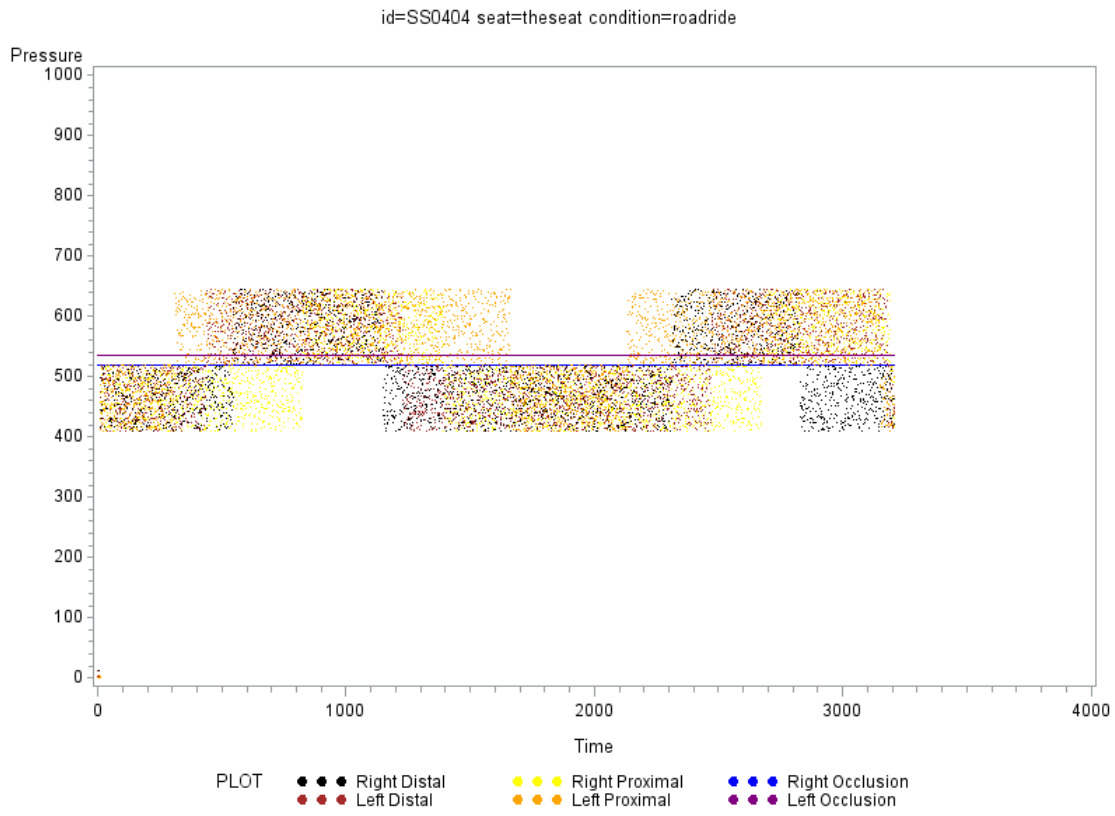

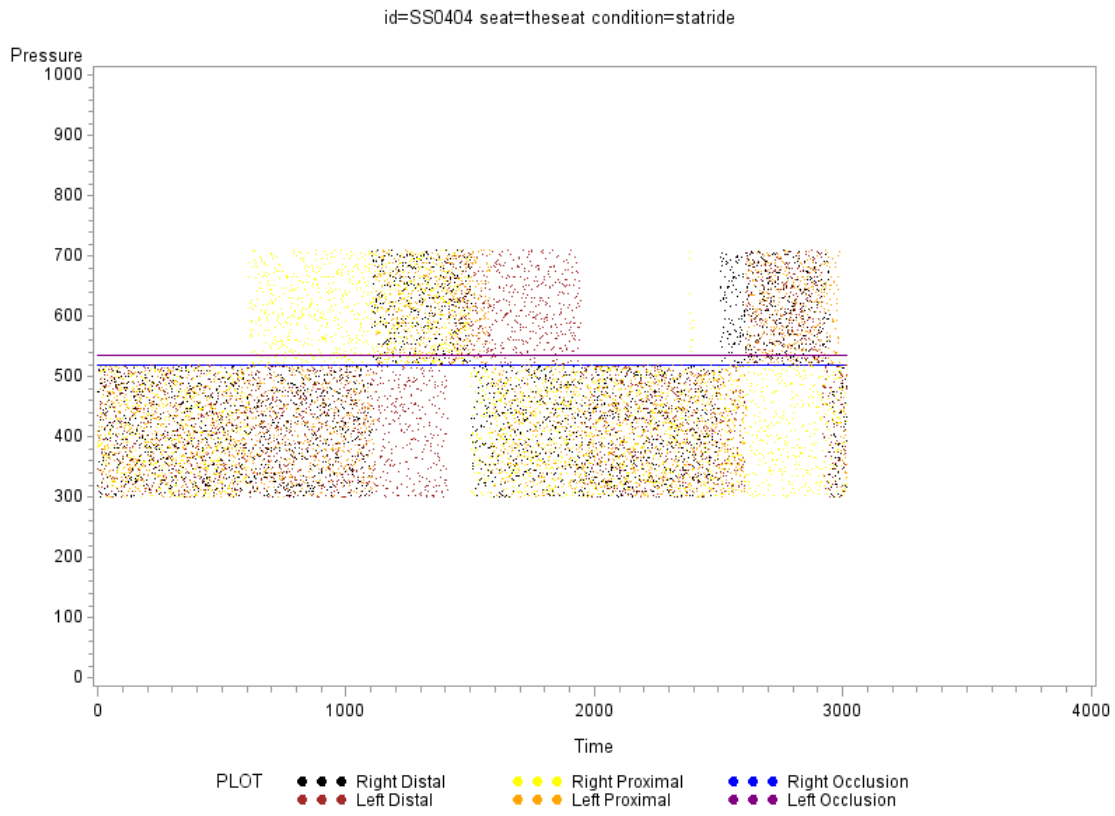

Supplement: PlotsPressureByTime_240.pdf [file PlotsPressureByTime_240.pdf]
